# Supplementary material for: Development of core-collections for Guizhou tea genetic resources and GWAS of leaf size using SNP developed by genotyping-by-sequencing
Source: PeerJ journal article supplement (doi:10.7717/peerj.8572), 2020-03-13

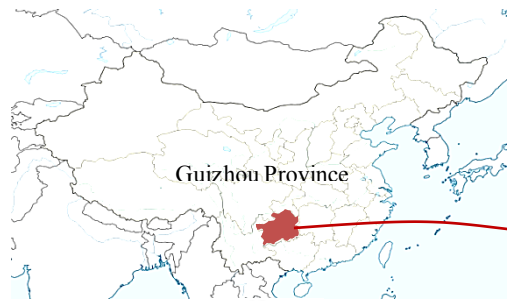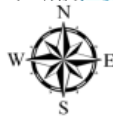

### Legend

- Ia. Area with a good suitable climate for tea plant growth in North, Guizhou
- Ib. Area with a good suitable climate for tea plant growth in East, Guizhou
- Ic. Area with a good suitable climate for tea plant growth in South, Guizhou
- II. Area with a suitable climate for tea plant growth in center, Guizhou
- III. Area with a minor suitable climate in West, Guizhou
- IV. Area with an unsuitable climate in West, Guizhou

⊙ City

Agriculture climate regionalization map for tea plant growth in Guizhou Plateau

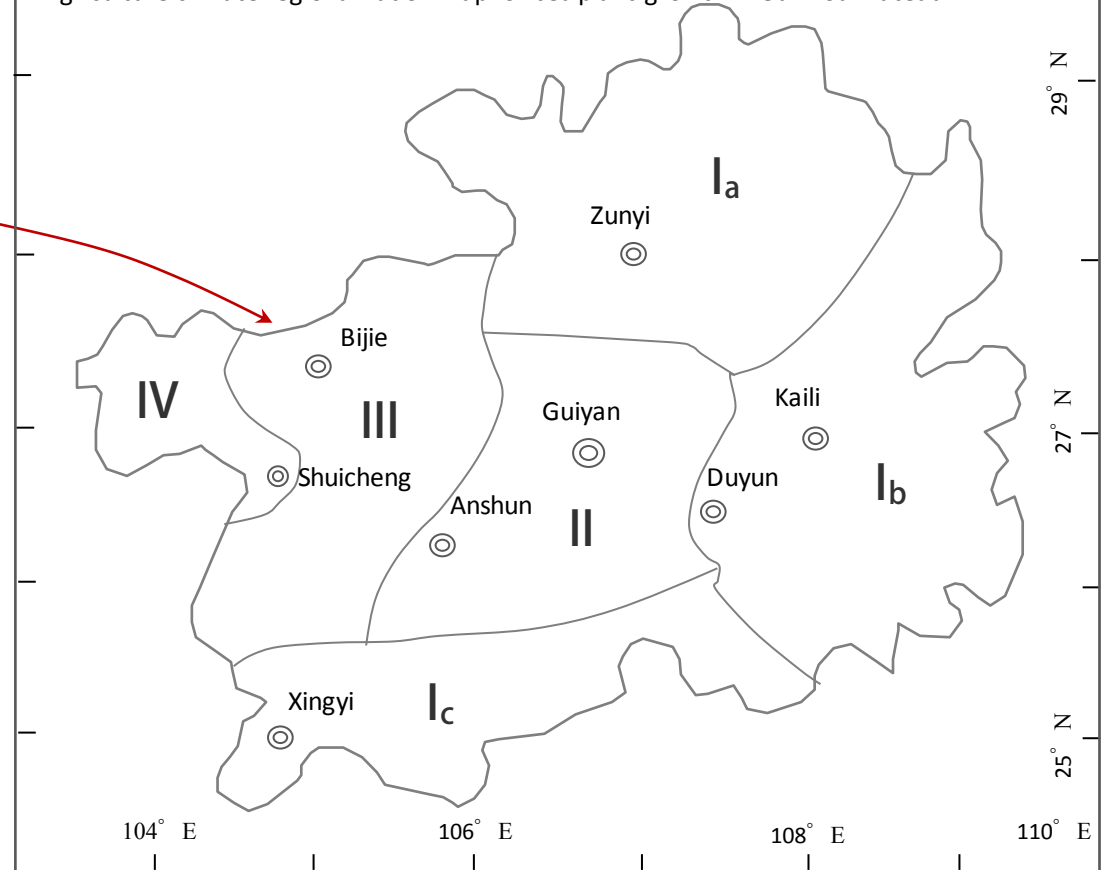

Supplement: Fig_S1.pdf [file Fig_S1.pdf]
