# Supplementary material for: Development of core-collections for Guizhou tea genetic resources and GWAS of leaf size using SNP developed by genotyping-by-sequencing
Source: PeerJ journal article supplement (doi:10.7717/peerj.8572), 2020-03-13

A

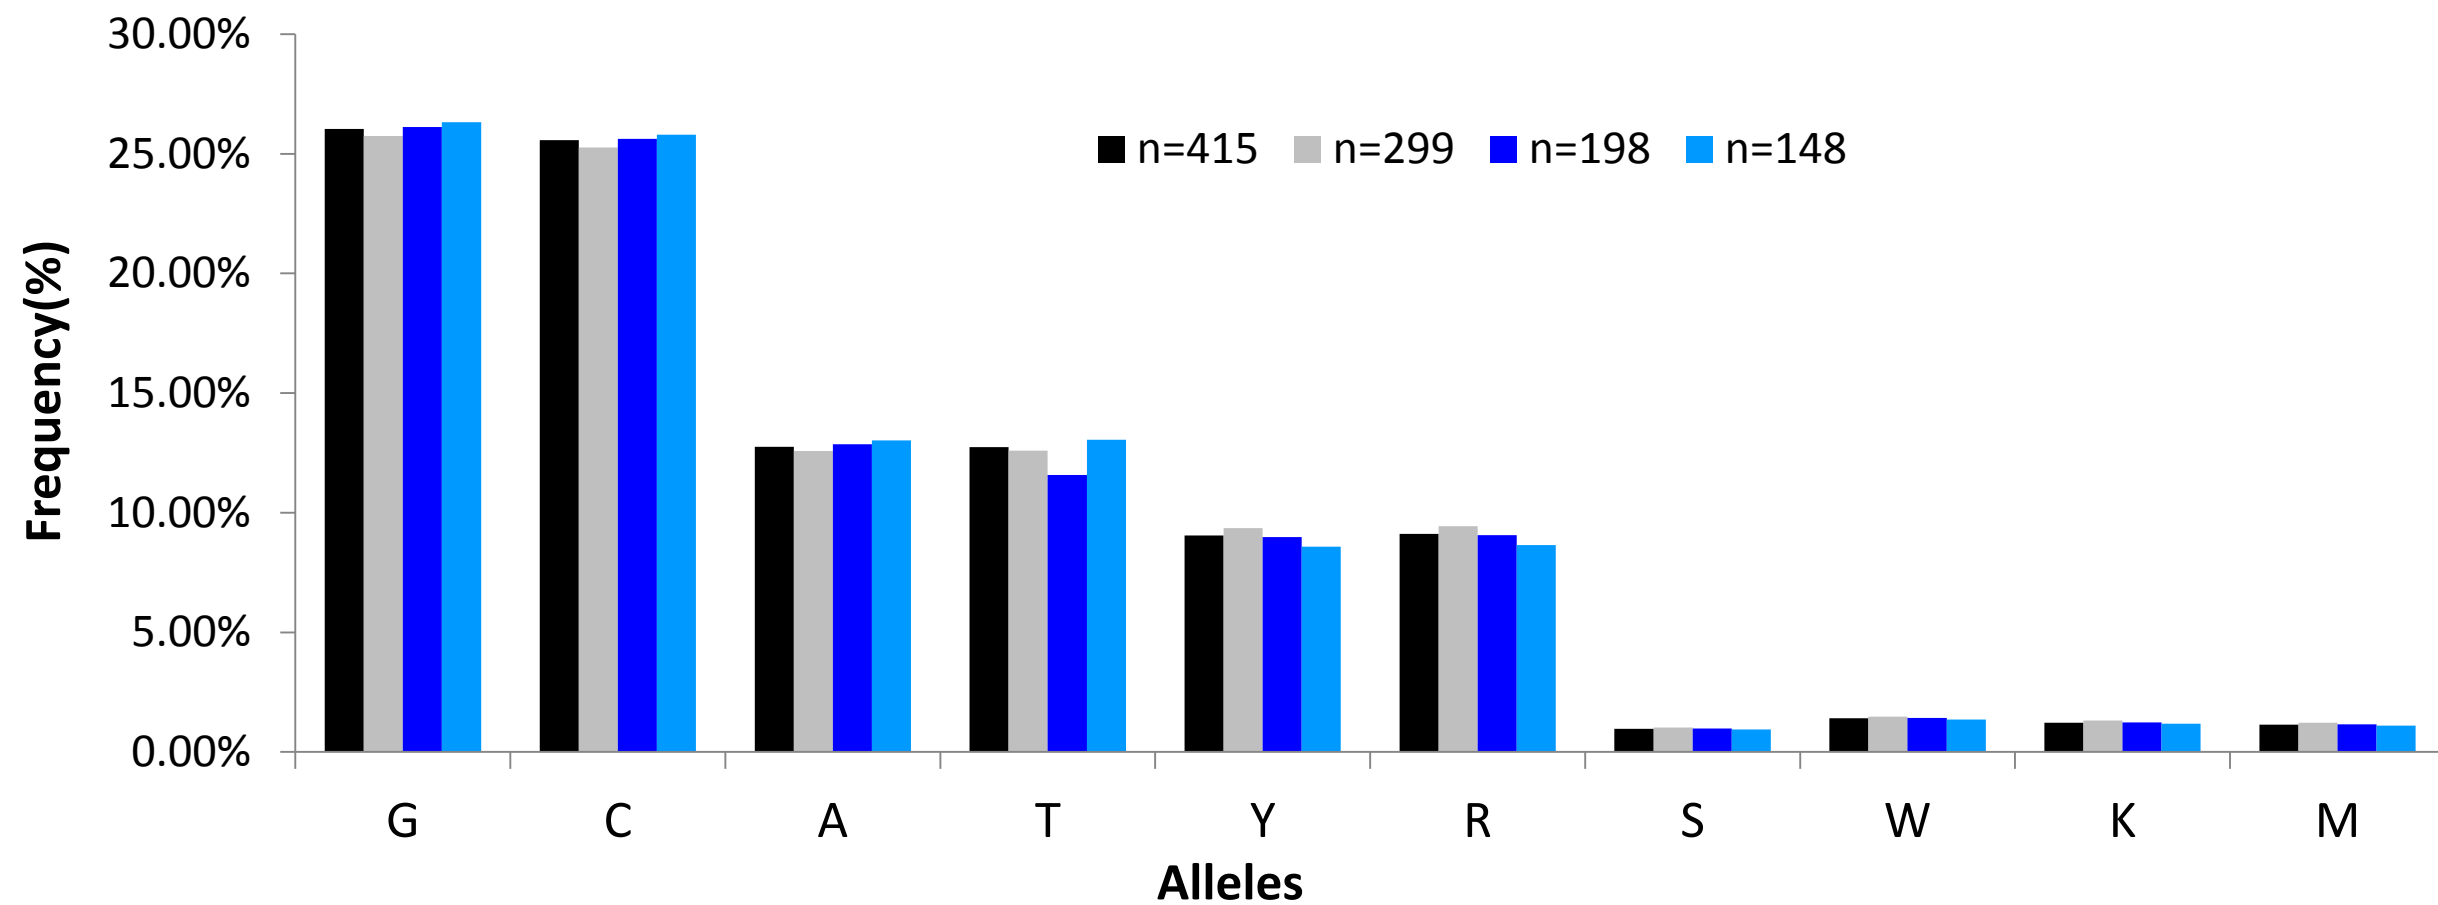

B

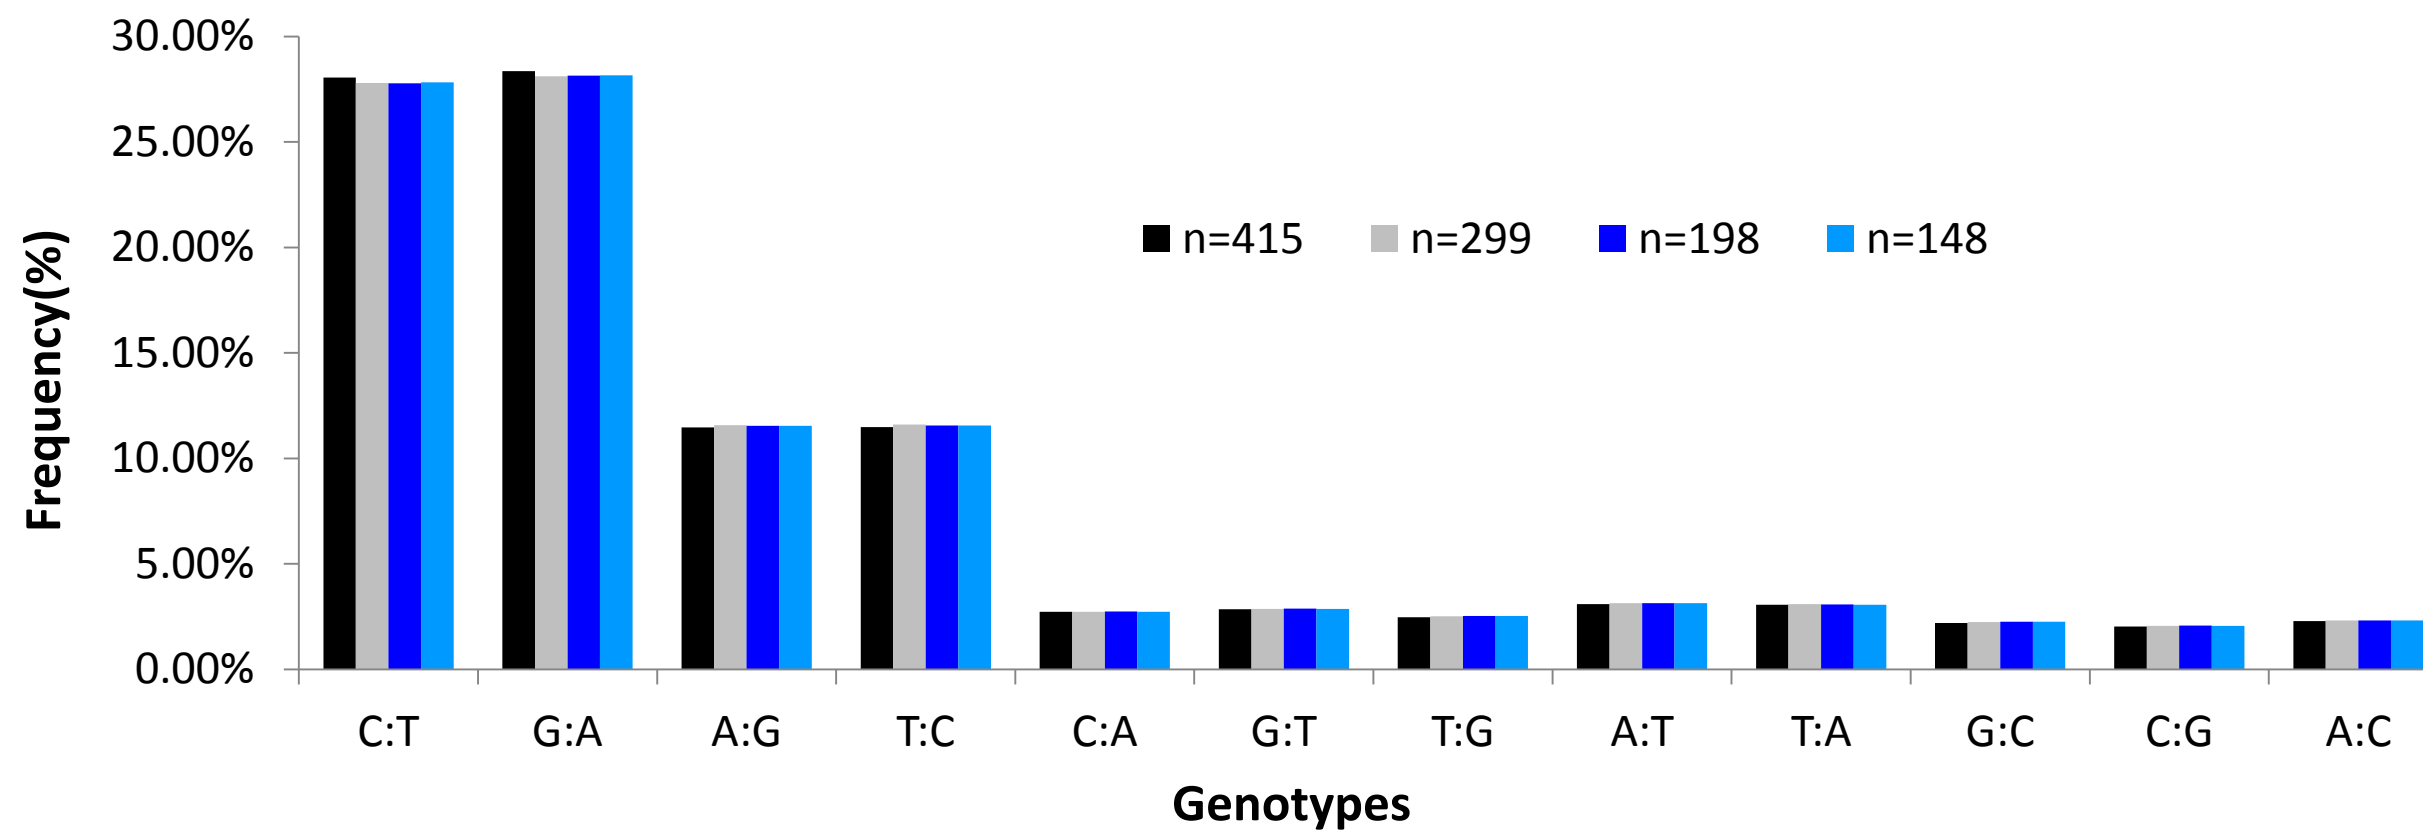

Supplement: Fig_S3.pdf [file Fig_S3.pdf]
