# Supplementary material for: Development of core-collections for Guizhou tea genetic resources and GWAS of leaf size using SNP developed by genotyping-by-sequencing
Source: PubMed Central journal article supplement (PMC7075365; doi:10.7717/peerj.8572), 2020-03-13

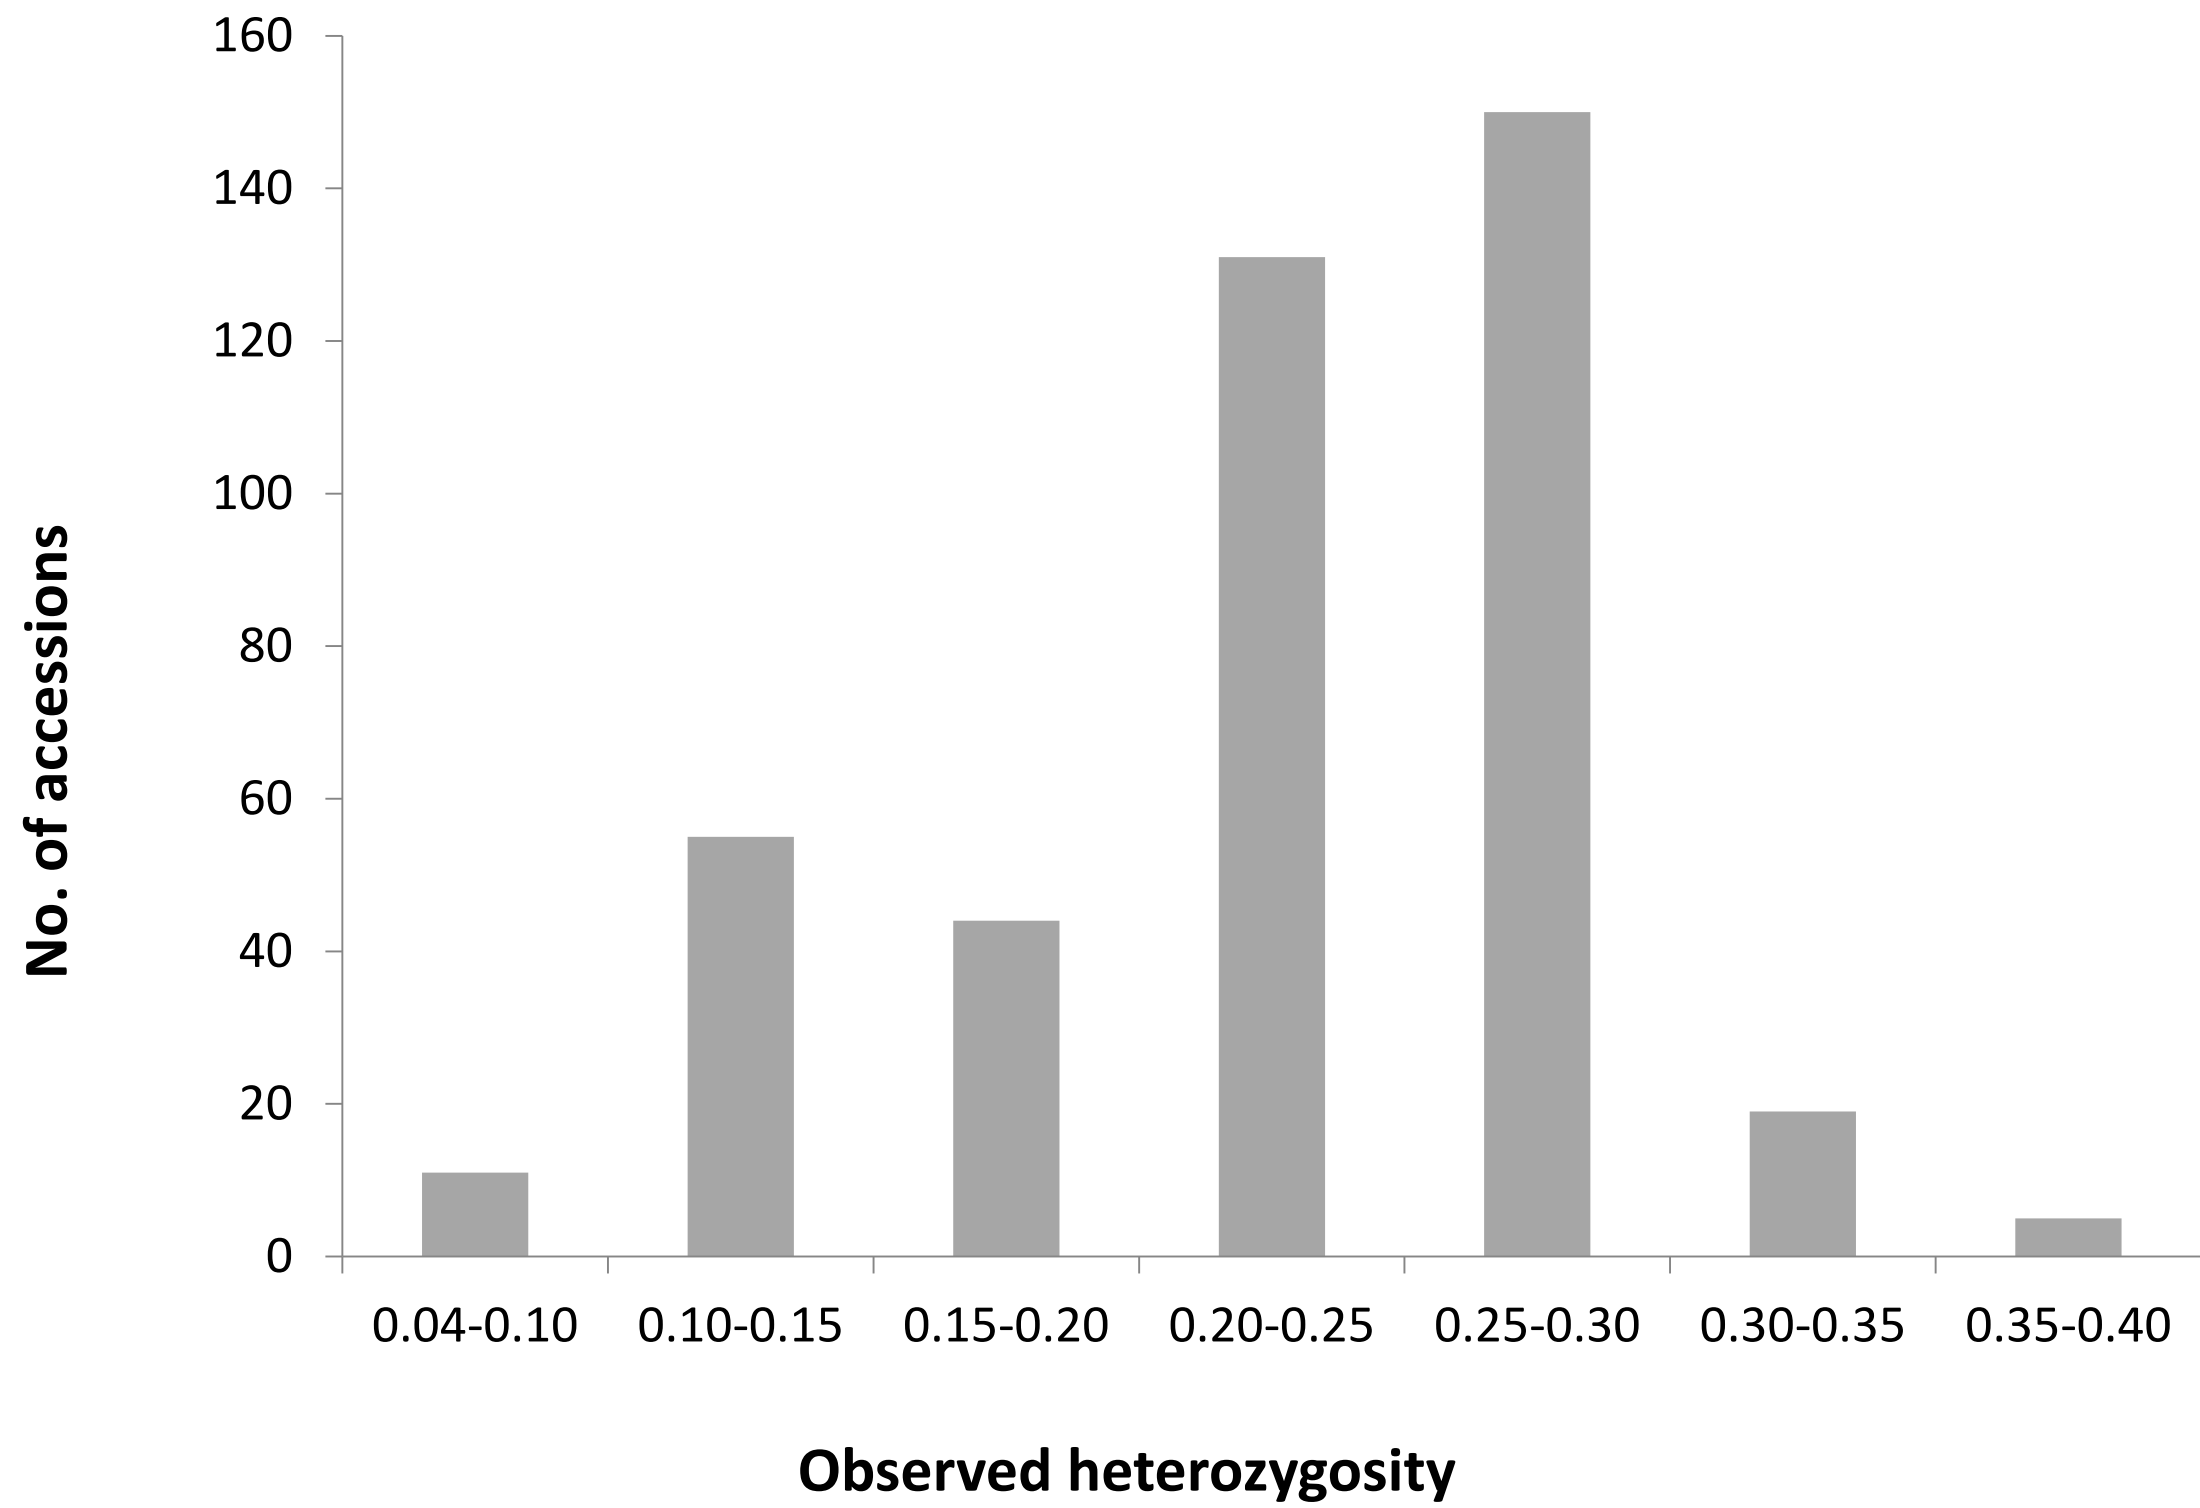

Supplement: peerj-08-8572-s002.pdf [file peerj-08-8572-s002.pdf]
