# Supplementary material for: Development of core-collections for Guizhou tea genetic resources and GWAS of leaf size using SNP developed by genotyping-by-sequencing
Source: PeerJ. 2020 Mar 13;8:e8572. doi: 10.7717/peerj.8572 (PMC7075365; doi:10.7717/peerj.8572)
Supplement: Table S1 — The accession/clone /collection, the accession name, the zone, the cultivation status, growth habits, the species, the observed heterozygosity, the core collection (N = 299), the core collection (N = 198) and the mini-core collection (N = 148). [file peerj-08-8572-s007.xlsx]

## Sheet: Table S1
Table S1 Information of 415 tea accessions used in this study.
Serial No.	DNA ID	Accession/clone/collection	zoning	cultivation status	growth habits	Species	Group (G) membership based on cluster analysis	Notes	source	Observed heterozygosity (%)	Core collection (N=299)	core collection (N=198)	Mini-core collection (N=148)
GZ001	1	J3-1	II	Ancient landraces	cultivation type	Camellia sinensis?	G1	Ancient cultivar shrub , more than two hundred years	Huaxi.Guizhou Province	0.188119	kept	kept	remove
GZ002	2	J3-2	II	Ancient landraces	cultivation type	Camellia sinensis	G1	Ancient cultivar shrub , more than two hundred years	Huaxi.Guizhou Province	0.270631	remove	remove	remove
GZ003	3	J3-3	II	Ancient landraces	cultivation type	Camellia sinensis	G1	Ancient cultivar shrub , more than two hundred years	Huaxi.Guizhou Province	0.343604	kept	remove	remove
GZ004	5	J3-4	II	Ancient landraces	cultivation type	Camellia sinensis	G1	Ancient cultivar shrub , more than two hundred years	Huaxi.Guizhou Province	0.217449	kept	kept	kept
GZ005	8	J7	II	Ancient landraces	cultivation type	Camellia sinensis	G1	Ancient cultivar shrub , more than two hundred years	Huaxi.Guizhou Province	0.218652	kept	kept	kept
GZ006	12	J4-5	II	Ancient landraces	cultivation type	Camellia sinensis	G1	Ancient cultivar shrub , more than two hundred years	Huaxi.Guizhou Province	0.226036	kept	kept	remove
GZ007	13	J4-6	II	Ancient landraces	cultivation type	Camellia sinensis	G1	Ancient cultivar shrub , more than two hundred years	Huaxi.Guizhou Province	0.253173	kept	remove	remove
GZ008	15	J5-2	II	Ancient landraces	cultivation type	Camellia sinensis	G1	Ancient cultivar shrub , more than two hundred years	Huaxi.Guizhou Province	0.326966	kept	kept	kept
GZ009	18	J4genqu	II	Ancient landraces	cultivation type	Camellia sinensis	G1	Ancient cultivar shrub , more than two hundred years	Huaxi.Guizhou Province	0.200316	kept	kept	kept
GZ010	20	J9genqu	II	Ancient landraces	cultivation type	Camellia sinensis	G1	Ancient cultivar shrub , more than two hundred years	Huaxi.Guizhou Province	0.23479	kept	kept	kept
GZ011	21	J9	II	Ancient landraces	cultivation type	Camellia sinensis	G1	Ancient cultivar shrub , more than two hundred years	Huaxi.Guizhou Province	0.234904	remove	remove	remove
GZ012	22	QINGSHA-1	Ia	Ancient landraces	cultivation type	Camellia sinensis	G1	Ancient cultivar shrub , more than two hundred years	Jinsha County.Guizhou Province	0.202422	kept	kept	kept
GZ013	23	QINGSHA-2	Ia	Wild tree	wild type	camellia remotiserrata?	G3	Ancient wild tree. more than two hundred years	Jinsha County.Guizhou Province	0.236449	kept	remove	remove
GZ014	24	QINGSHA-6	Ia	Wild tree	wild type	camellia remotiserrata?	G3	Ancient wild tree. more than three hundred years	Jinsha County.Guizhou Province	0.236444	kept	kept	kept+
GZ015	25	QINGSHA-7	Ia	Wild tree	wild type	camellia remotiserrata?	G3	Ancient wild tree. more than two hundred years	Jinsha County.Guizhou Province	0.301465	kept	kept	kept
GZ016	26	QINGSHA-9	Ia	Wild tree	wild type	camellia remotiserrata?	G3	Ancient wild tree. more than two hundred years	Jinsha County.Guizhou Province	0.250972	kept	remove	remove
GZ017	27	QINGSHA-11	Ia	Wild tree	wild type	camellia remotiserrata?	G3	Natural offsprings of Ancient wild tree	Jinsha County.Guizhou Province	0.352854	kept	remove	remove
GZ018	28	QINGSHA-12	Ia	Wild tree	wild type	camellia remotiserrata?	G11	Natural offsprings of Ancient wild tree	Jinsha County.Guizhou Province	0.26161	kept	kept	remove
GZ019	29	DY-Yuancha1	Ib	Modern landraces	cultivation type	Camellia sinensis	G4	landraces	Duyun City.Guizhou Province	0.224167	kept	remove	remove
GZ020	30	DY-Yuancha2	Ib	Modern landraces	cultivation type	Camellia sinensis	G4	landraces	Duyun City.Guizhou Province	0.221825	remove	remove	remove
GZ021	31	DY-Yuancha3	Ib	Modern landraces	cultivation type	Camellia sinensis	G4	landraces	Duyun City.Guizhou Province	0.221758	kept	remove	remove
GZ022	32	DY-Yuancha4	Ib	Modern landraces	cultivation type	Camellia sinensis	G4	landraces	Duyun City.Guizhou Province	0.196193	remove	remove	remove
GZ023	33	DY-Yuancha5	Ib	Modern landraces	cultivation type	Camellia sinensis	G4	landraces	Duyun City.Guizhou Province	0.237237	kept	remove	remove
GZ024	34	DY-Yuancha6	Ib	Modern landraces	cultivation type	Camellia sinensis	G4	landraces	Duyun City.Guizhou Province	0.236136	kept	remove	remove
GZ025	35	DY-Yuancha7	Ib	Modern landraces	cultivation type	Camellia sinensis	G4	landraces	Duyun City.Guizhou Province	0.237527	kept	remove	remove
GZ026	36	DY-Yuancha8	Ib	Modern landraces	cultivation type	Camellia sinensis	G4	landraces	Duyun City.Guizhou Province	0.241515	remove	remove	remove
GZ027	37	XINANLANMU-4	Ic	Wild tree	wild type	Camellia tachangensis	G2	Ancient wild tree. more than one hundred years	Xingyi City.Guizhou Province	0.123823	remove	remove	remove
GZ028	38	XINANLANMU	Ic	Wild tree	wild type	Camellia tachangensis	G2	Ancient wild tree. more than one hundred years	Xingyi City.Guizhou Province	0.160136	kept	remove	remove
GZ029	39	ZHENGAN2-1	Ia	Ancient landraces	cultivation type	Camellia sinensis	G4	Ancient cultivar shrub , more than two hundred years	zheng'an County.Guizhou Province	0.283095	remove	remove	remove
GZ030	40	ZHENGAN2-2	Ia	Ancient landraces	cultivation type	Camellia sinensis	G4	Ancient cultivar shrub , more than two hundred years	zheng'an County.Guizhou Province	0.306664	kept	remove	remove
GZ031	41	ZHENGAN2-3	Ia	Ancient landraces	cultivation type	Camellia sinensis	G4	Ancient cultivar shrub , more than two hundred years	zheng'an County.Guizhou Province	0.277015	remove	remove	remove
GZ032	42	ZHENGAN2-4	Ia	Ancient landraces	cultivation type	Camellia sinensis	G4	Ancient cultivar shrub , more than two hundred years	zheng'an County.Guizhou Province	0.29854	kept	kept	kept
GZ033	43	ZHENGAN2-5	Ia	Ancient landraces	cultivation type	Camellia sinensis	G4	Ancient cultivar shrub , more than three hundred years	Zheng'an County.Guizhou Province	0.284178	remove	remove	remove
GZ034	44	ZHENGAN2-6	Ia	Ancient landraces	cultivation type	Camellia sinensis	G4	Ancient cultivar shrub , more than two hundred years	zheng'an County.Guizhou Province	0.287485	kept	remove	remove
GZ035	45	ZHENGAN2-7	Ia	Ancient landraces	cultivation type	Camellia sinensis	G4	Ancient cultivar shrub , more than two hundred years	zheng'an County.Guizhou Province	0.206006	kept	kept	remove
GZ036	46	ZHENGAN1-1	Ia	Wild tree	wild type	camellia remotiserrata ?	G3	Natural offsprings of Ancient wild tree	zheng'an County.Guizhou Province	0.305062	kept	remove	remove
GZ037	47	ZHENGAN1-2	Ia	Wild tree	wild type	camellia remotiserrata ?	G3	Natural offsprings of Ancient wild tree	zheng'an County.Guizhou Province	0.289155	kept	kept	remove
GZ038	48	ZHENGAN1-3	Ia	Wild tree	wild type	camellia remotiserrata ?	G3	Ancient wild tree. more than one hundred years	zheng'an County.Guizhou Province	0.255799	kept	kept	kept
GZ039	51	ZHENGAN2-7	Ia	Ancient landraces	cultivation type	Camellia sinensis	G4	Ancient cultivar shrub , more than two hundred years	zheng'an County.Guizhou Province	0.200543	kept	kept	kept
GZ040	60	ZHENGAN2-8	Ia	Ancient landraces	cultivation type	Camellia sinensis	G4	Ancient cultivar shrub , more than two hundred years	zheng'an County.Guizhou Province	0.18826	kept	kept	kept
GZ041	61	ZHENGAN2-9	Ia	Ancient landraces	cultivation type	Camellia sinensis	G4	Ancient cultivar shrub , more than two hundred years	zheng'an County.Guizhou Province	0.214017	kept	remove	remove
GZ042	62	ZHENGAN2-35	Ia	Ancient landraces	cultivation type	Camellia sinensis	G4	Ancient cultivar shrub , more than two hundred years	zheng'an County.Guizhou Province	0.297294	kept	remove	remove
GZ043	63	ZHENGAN2-41	Ia	Ancient landraces	cultivation type	Camellia sinensis	G4	Ancient cultivar shrub , more than two hundred years	zheng'an County.Guizhou Province	0.254621	kept	remove	remove
GZ044	64	ZHENGAN2-42	Ia	Ancient landraces	cultivation type	Camellia sinensis	G4	Ancient cultivar shrub , more than two hundred years	zheng'an County.Guizhou Province	0.256941	remove	remove	remove
GZ045	65	ZHENGAN2-45	Ia	Ancient landraces	cultivation type	Camellia sinensis	G4	Natural offsprings of Ancient cultivar suber	zheng'an County.Guizhou Province	0.280804	remove	remove	remove
GZ046	67	XINGREN-3	Ic	Wild tree	wild type	Camellia tachangensis ?	G1	Natural offsprings of Ancient wild tree	Xingren County.Guizhou Province	0.227748	kept	kept	remove
GZ047	68	XINGREN-4	Ic	Wild tree	wild type	Camellia tachangensis ?	G2	Ancient wild tree. more than one hundred years	Xingren County.Guizhou Province	0.254358	remove	remove	remove
GZ048	69	XINGREN-5	Ic	Wild tree	wild type	Camellia tachangensis ?	G2	Ancient wild tree. more than one hundred years	Xingren County.Guizhou Province	0.253871	remove	remove	remove
GZ049	70	SD-Yuancha1	Ib	Modern landraces	cultivation type	Camellia sinensis	G5	landraces	Sandu County.Guizhou Province	0.253967	kept	remove	remove
GZ050	71	SD-Yuancha2	Ib	Modern landraces	cultivation type	Camellia sinensis	G5	landraces	Sandu County.Guizhou Province	0.262457	kept	remove	remove
GZ051	72	SD-Yuancha3	Ib	Modern landraces	cultivation type	Camellia sinensis	G5	landraces	Sandu County.Guizhou Province	0.237602	kept	kept	kept+
GZ052	73	SD-Yuancha4	Ib	Modern landraces	cultivation type	Camellia sinensis	G5	landraces	Sandu County.Guizhou Province	0.159534	kept	kept	kept
GZ053	74	SD-Yuancha5	Ib	Modern landraces	cultivation type	Camellia sinensis	G5	landraces	Sandu County.Guizhou Province	0.268906	remove	remove	remove
GZ054	75	SD-Yuancha6	Ib	Modern landraces	cultivation type	Camellia sinensis	G5	landraces	Sandu County.Guizhou Province	0.268228	remove	remove	remove
GZ055	76	SD-Yuancha7	Ib	Modern landraces	cultivation type	Camellia sinensis	G5	landraces	Sandu County.Guizhou Province	0.214339	kept	kept	kept
GZ056	77	QINGTANG-2(N139-2)	Ib	Ancient landraces	cultivation type	Camellia sinensis	G1	Ancient cultivar shrub, more than one hundred years	Duyun City.Guizhou Province	0.240023	kept	kept	kept
GZ057	78	QINGTANGSHISHENG2-9	Ib	Ancient landraces	cultivation type	Camellia sinensis	G1	Ancient cultivar shrub, more than one hundred years	Duyun City.Guizhou Province	0.260816	remove	remove	remove
GZ058	79	QINGTANG-4	Ib	Ancient landraces	cultivation type	Camellia sinensis	G1	Ancient cultivar shrub, more than one hundred years	Duyun City.Guizhou Province	0.262319	kept	remove	remove
GZ059	80	QINGTANG-5	Ib	Ancient landraces	cultivation type	Camellia sinensis	G1	Ancient cultivar shrub, more than one hundred years	Duyun City.Guizhou Province	0.239782	kept	kept	kept+
GZ060	81	QINGTANG-7	Ib	Ancient landraces	cultivation type	Camellia sinensis	G1	Ancient cultivar shrub, more than one hundred years	Duyun City.Guizhou Province	0.230383	remove	remove	remove
GZ061	82	SD-Yuancha8	Ib	Modern landraces	cultivation type	Camellia sinensis	G5	landraces	Sandu County.Guizhou Province	0.251941	kept	remove	remove
GZ062	83	WC-Jiacha-1	Ia	Modern landraces	cultivation type	Camellia sinensis	G4	landraces	Wuchuan County.Guizhou Province	0.210922	kept	remove	remove
GZ063	84	WC-Jiacha-3	Ia	Modern landraces	cultivation type	Camellia sinensis	G4	landraces	Wuchuan County.Guizhou Province	0.258348	kept	remove	remove
GZ064	85	DAOZHEN2-1	Ia	Ancient landraces	cultivation type	Camellia sinensis	G7	Ancient cultivar shrub , more than two hundred years	Daozhen County.Guizhou Province	0.324617	kept	kept	kept
GZ065	86	DAOZHEN2-3	Ia	Ancient landraces	cultivation type	Camellia sinensis	G7	Ancient cultivar shrub , more than two hundred years	Daozhen County.Guizhou Province	0.250745	kept	remove	remove
GZ066	87	DAOZHEN2-4	Ia	Ancient landraces	cultivation type	Camellia sinensis	G4	Ancient cultivar shrub , more than two hundred years	Daozhen County.Guizhou Province	0.267472	kept	remove	remove
GZ067	88	DAOZHEN2-5	Ia	Ancient landraces	cultivation type	Camellia sinensis	G7	Ancient cultivar shrub , more than two hundred years	Daozhen County.Guizhou Province	0.268988	remove	remove	remove
GZ068	89	DAOZHEN2-10	Ia	Wild tree	wild type	camellia remotiserrata?	G2	Ancient wild tree. more than one hundred years	Daozhen County.Guizhou Province	0.295484	kept	kept	remove
GZ069	90	DZH-Jiacha-9	Ia	Modern landraces	cultivation type	Camellia sinensis	G4	landraces	Daozhen County.Guizhou Province	0.294555	kept	kept	kept
GZ070	91	XINGYILANMUQING-1	Ic	Wild tree	wild type	Camellia taliensis	G3	Ancient wild tree. more than one hundred years	Xingyi City.Guizhou Province	0.268257	kept	remove	remove
GZ071	92	DAOZHEN1-2	Ia	Ancient landraces	cultivation type	Camellia sinensis	G7	Ancient cultivar shrub , more than two hundred years	Daozhen County.Guizhou Province	0.264753	kept	remove	remove
GZ072	93	DAOZHEN1-3	Ia	Wild tree	wild type	camellia remotiserrata ?	G3	Ancient wild tree. more than one hundred years	Daozhen County.Guizhou Province	0.385844	kept	kept	remove
GZ073	94	PUANBANPO3-6	III	Wild tree	wild type	Camellia tachangensis	G2	Ancient wild tree. more than one hundred years	Puan County.Guizhou Province	0.11071	remove	remove	remove
GZ074	96	PUANBANPO2-11	III	Wild tree	wild type	Camellia tachangensis	G2	Ancient wild tree. more than one hundred years	Puan County.Guizhou Province	0.121465	remove	remove	remove
GZ075	97	PUANBANPO-32	III	Wild tree	wild type	Camellia tachangensis	G1	Natural offsprings of ancient wild tree	Puan County.Guizhou Province	0.21965	kept	remove	remove
GZ076	98	PUANBANPO-43	III	Wild tree	wild type	Camellia tachangensis	G2	Ancient wild tree. more than one hundred years	Puan County.Guizhou Province	0.114001	remove	remove	remove
GZ077	100	PUANBANP1-73	III	Wild tree	wild type	Camellia tachangensis	G1	Natural offsprings of ancient wild tree	Puan County.Guizhou Province	0.205168	kept	kept	remove
GZ078	101	PUANBANP1-76	III	Wild tree	wild type	Camellia tachangensis	G2	Ancient wild tree. more than one hundred years	Puan County.Guizhou Province	0.111127	remove	remove	remove
GZ079	102	PUANBANP1-81	III	Wild tree	wild type	Camellia tachangensis	G2	Natural offsprings of ancient wild tree	Puan County.Guizhou Province	0.13176	kept	kept	kept
GZ080	103	PUANBANP1-87	III	Wild tree	wild type	Camellia tachangensis	G2	Natural offsprings of ancient wild tree	Puan County.Guizhou Province	0.201511	kept	remove	remove
GZ081	107	SH5-13(N271-1)	Ia	Wild tree	wild type	camellia remotiserrata?	G1	Ancient wild tree. more than one hundred years	Wuchuan County.Guizhou Province	0.151285	kept	kept	kept
GZ082	108	SH5-1	Ia	Wild tree	wild type	camellia remotiserrata	G3	Natural offsprings of ancient wild tree	Wuchuan County.Guizhou Province	0.259683	remove	remove	remove
GZ083	109	SH5-14	Ia	Wild tree	wild type	camellia remotiserrata	G3	Natural offsprings of ancient wild tree	Wuchuan County.Guizhou Province	0.26574	remove	remove	remove
GZ084	110	SH5-2(N274-1)	Ia	Wild tree	wild type	camellia remotiserrata	G3	Natural offsprings of ancient wild tree	Wuchuan County.Guizhou Province	0.261448	kept	remove	remove
GZ085	111	SH5-4	Ia	Wild tree	wild type	camellia remotiserrata	G3	Ancient wild tree. more than one hundred years	Wuchuan County.Guizhou Province	0.20023	kept	kept	remove
GZ086	112	SH5-6	Ia	Wild tree	wild type	camellia remotiserrata?	G3	Ancient wild tree. more than one hundred years	Wuchuan County.Guizhou Province	0.240711	remove	remove	remove
GZ087	113	SH5-7	Ia	Wild tree	wild type	camellia remotiserrata	G3	Ancient wild tree. more than one hundred years	Wuchuan County.Guizhou Province	0.276716	kept	remove	remove
GZ088	114	SH5-18	Ia	Wild tree	wild type	camellia remotiserrata	G3	Ancient wild tree. more than one hundred years	Wuchuan County.Guizhou Province	0.243061	kept	remove	remove
GZ089	115	SH5-21	Ia	Wild tree	wild type	camellia remotiserrata	G3	Ancient wild tree. more than one hundred years	Wuchuan County.Guizhou Province	0.304201	remove	remove	remove
GZ090	116	SH5-9	Ia	Wild tree	wild type	camellia remotiserrata	G3	Ancient wild tree. more than one hundred years	Wuchuan County.Guizhou Province	0.275429	remove	remove	remove
GZ091	117	SH5-23	Ia	Wild tree	wild type	camellia remotiserrata	G3	Natural offsprings of ancient wild tree	Wuchuan County.Guizhou Province	0.345767	kept	kept	kept
GZ092	118	SH5-24	Ia	Wild tree	wild type	camellia remotiserrata	G3	Ancient wild tree. more than one hundred years	Wuchuan County.Guizhou Province	0.293311	kept	remove	remove
GZ093	119	D217-6	Ia	Wild tree	wild type	camellia remotiserrata	G3	Ancient wild tree. more than one hundred years	Wuchuan County.Guizhou Province	0.233247	kept	kept	kept
GZ094	120	D21-5	Ia	Wild tree	wild type	camellia remotiserrata	G4	Ancient wild tree. more than one hundred years	Wuchuan County.Guizhou Province	0.324927	kept	kept	kept
GZ095	121	D21-3	Ia	Wild tree	wild type	camellia remotiserrata	G3	Ancient wild tree. more than one hundred years	Wuchuan County.Guizhou Province	0.312781	remove	remove	remove
GZ096	122	D21-1	Ia	Wild tree	wild type	camellia remotiserrata	G3	Ancient wild tree. more than one hundred years	Wuchuan County.Guizhou Province	0.230388	kept	kept	remove
GZ097	123	D27-1	Ia	Wild tree	wild type	camellia remotiserrata	G3	Ancient wild tree. more than one hundred years	Wuchuan County.Guizhou Province	0.25598	kept	kept	remove
GZ098	124	D21-11	Ia	Wild tree	wild type	camellia remotiserrata	G3	Ancient wild tree. more than one hundred years	Wuchuan County.Guizhou Province	0.358481	kept	remove	remove
GZ099	126	AN-G2	II	Ancient landraces	cultivation type	Camellia sinensis	G1	Ancient cultivar shrub, more than one hundred years	Huaxi District.Guizhou Province	0.220297	kept	kept	kept
GZ100	127	XINGLAN(N311)	Ic	Wild tree	wild type	Camellia tachangensis	G1	Ancient wild tree. more than one hundred years	Xingyi City.Guizhou Province	0.144697	kept	kept	kept
GZ101	128	AN-G3	II	Modern landraces	cultivation type	Camellia sinensis	G4	landraces	Huaxi District.Guizhou Province	0.244025	kept	remove	remove
GZ102	129	AN-G4	II	Ancient landraces	cultivation type	Camellia sinensis	G4	Ancient cultivar shrub, more than two hundred years	Huaxi District.Guizhou Province	0.244357	remove	remove	remove
GZ103	130	AN-G5	II	Ancient landraces	cultivation type	Camellia sinensis	G4	Ancient cultivar shrub, more than two hundred years	Huaxi District.Guizhou Province	0.224966	kept	kept	kept
GZ104	131	AN-G6	II	Ancient landraces	cultivation type	Camellia sinensis	G4	Ancient cultivar shrub, more than two hundred years	Huaxi District.Guizhou Province	0.234839	kept	kept	kept
GZ105	132	AN-G7	II	Ancient landraces	cultivation type	Camellia sinensis	G4	Ancient cultivar shrub, more than two hundred years	Huaxi District.Guizhou Province	0.275687	remove	remove	remove
GZ106	133	AN-G8	II	Ancient landraces	cultivation type	Camellia sinensis	G4	Ancient cultivar shrub, more than two hundred years	Huaxi District.Guizhou Province	0.28418	kept	remove	remove
GZ107	134	AN-G9	II	Modern landraces	cultivation type	Camellia sinensis	G4	landraces	Huaxi District.Guizhou Province	0.225506	kept	remove	remove
GZ108	135	AN-G10	II	Ancient landraces	cultivation type	Camellia sinensis	G1	Ancient cultivar shrub, more than two hundred years	Huaxi District.Guizhou Province	0.2248	kept	remove	remove
GZ109	136	DUQING5-1	Ib	Ancient landraces	cultivation type	Camellia sinensis	G1	Ancient cultivar shrub, more than two hundred years	Duyun City.Guizhou Province	0.255282	kept	remove	remove
GZ110	137	DUQING5-2	Ib	Ancient landraces	cultivation type	Camellia sinensis	G1	Ancient cultivar shrub, more than two hundred years	Duyun City.Guizhou Province	0.287709	kept	remove	remove
GZ111	138	DUQING3-1	Ib	Ancient landraces	cultivation type	Camellia sinensis	G1	Ancient cultivar shrub, more than two hundred years	Duyun City.Guizhou Province	0.154799	kept	kept	kept
GZ112	139	DUQING7	Ib	Ancient landraces	cultivation type	Camellia sinensis	G1	Ancient cultivar shrub, more than two hundred years	Duyun City.Guizhou Province	0.267563	kept	remove	remove
GZ113	140	SD-Yuancha9	Ib	Modern landraces	cultivation type	Camellia sinensis	G5	landraces	Sandu County.Guizhou Province	0.287394	kept	kept	remove
GZ114	141	DUQING-1	Ib	Ancient landraces	cultivation type	Camellia sinensis	G1	Ancient cultivar shrub, more than two hundred years	Duyun City.Guizhou Province	0.241455	kept	remove	remove
GZ115	142	SD-Yuancha10	Ib	Modern landraces	cultivation type	Camellia sinensis	G5	landraces	Sandu County.Guizhou Province	0.234249	remove	remove	remove
GZ116	143	SD-Yuancha11	Ib	Modern landraces	cultivation type	Camellia sinensis	G5	landraces	Sandu County.Guizhou Province	0.283269	remove	remove	remove
GZ117	144	YX2)-1	II	Wild tree	wild type	Camellia tachangensis	G2	Ancient wild tree. more than one hundred years	Guiding County.Guizhou Province	0.124506	remove	remove	remove
GZ118	145	GD-3	II	Wild tree	wild type	Camellia tachangensis	G2	Natural offsprings of Ancient wild tree	Guiding County.Guizhou Province	0.146424	remove	remove	remove
GZ119	146	GD-7	II	Wild tree	wild type	Camellia tachangensis	G2	Natural offsprings of Ancient wild tree	Guiding County.Guizhou Province	0.251208	kept	remove	remove
GZ120	147	GD-4	II	Wild tree	wild type	Camellia tachangensis	G2	Natural offsprings of Ancient wild tree	Guiding County.Guizhou Province	0.119328	remove	remove	remove
GZ121	148	GD-8	II	Wild tree	wild type	Camellia tachangensis ?	G2	Natural offsprings of Ancient wild tree	Guiding County.Guizhou Province	0.252569	kept	remove	remove
GZ122	149	GD-9	II	Wild tree	wild type	Camellia tachangensis	G2	Ancient wild tree. more than one hundred years	Guiding County.Guizhou Province	0.292189	remove	remove	remove
GZ123	150	GD-13	II	Wild tree	wild type	Camellia tachangensis	G2	Ancient wild tree. more than one hundred years	Guiding County.Guizhou Province	0.102932	remove	remove	remove
GZ124	151	GD-15	II	Wild tree	wild type	Camellia tachangensis	G2	Natural offsprings of Ancient wild tree	Guiding County.Guizhou Province	0.256485	kept	remove	remove
GZ125	152	GDG-17	II	Wild tree	wild type	Camellia tachangensis	G2	Natural offsprings of Ancient wild tree	Guiding County.Guizhou Province	0.094109	kept	kept	kept
GZ126	153	GD-19	II	Wild tree	wild type	Camellia tachangensis	G2	Natural offsprings of Ancient wild tree	Guiding County.Guizhou Province	0.249898	kept	remove	remove
GZ127	154	GD-20	II	Wild tree	wild type	Camellia tachangensis	G2	Natural offsprings of Ancient wild tree	Guiding County.Guizhou Province	0.282194	remove	remove	remove
GZ128	155	GD-21	II	Wild tree	wild type	Camellia tachangensis	G3	Ancient wild tree. more than one hundred years	Guiding County.Guizhou Province	0.123317	remove	remove	remove
GZ129	157	GD-31	II	Wild tree	wild type	Camellia tachangensis	G2	Natural offsprings of Ancient wild tree	Guiding County.Guizhou Province	0.196577	kept	kept	remove
GZ130	161	GD-52	II	Wild tree	wild type	Camellia tachangensis	G2	Natural offsprings of Ancient wild tree	Guiding County.Guizhou Province	0.162384	kept	kept	kept
GZ131	168	YJ-Jiacha6	Ia	Modern landraces	cultivation type	Camellia sinensis	G5	landraces	Yinjiang County.Guizhou Province	0.262849	kept	remove	remove
GZ132	171	YJ-Jiacha8	Ia	Modern landraces	cultivation type	Camellia sinensis	G5	landraces	Yinjiang County.Guizhou Province	0.270718	kept	remove	remove
GZ133	172	YJ-Jiacha11	Ia	Modern landraces	cultivation type	Camellia sinensis	G5	landraces	Yinjiang County.Guizhou Province	0.235641	kept	kept	kept
GZ134	173	YJ-Jiacha12	Ia	Modern landraces	cultivation type	Camellia sinensis	G4	landraces	Yinjiang County.Guizhou Province	0.250218	kept	kept	kept
GZ135	177	DEJIANG-GONGLIN	Ia	Ancient landraces	cultivation type	Camellia sinensis	G7	Ancient cultivar shrub, more than two hundred years	Dejiang County.Guizhou Province	0.155904	kept	kept	kept
GZ136	178	YJ-Jiacha1	Ia	Modern landraces	cultivation type	Camellia sinensis	G4	landraces	Yinjiang County.Guizhou Province	0.286122	kept	remove	remove
GZ137	179	YJ-Jiacha2	Ia	Modern landraces	cultivation type	Camellia sinensis	G4	landraces	Yinjiang County.Guizhou Province	0.234662	kept	remove	remove
GZ138	180	YJ-Jiacha3	Ia	Modern landraces	cultivation type	Camellia sinensis	G4	landraces	Yinjiang County.Guizhou Province	0.210795	remove	remove	remove
GZ139	181	YJ-Jiacha4	Ia	Modern landraces	cultivation type	Camellia sinensis	G4	landraces	Yinjiang County.Guizhou Province	0.210129	kept	kept	remove
GZ140	182	YJ-Jiacha5	Ia	Modern landraces	cultivation type	Camellia sinensis	G4	landraces	Yinjiang County.Guizhou Province	0.27427	remove	remove	remove
GZ141	183	YJ-Jiacha6	Ia	Modern landraces	cultivation type	Camellia sinensis	G4	landraces	Yinjiang County.Guizhou Province	0.244256	remove	remove	remove
GZ142	184	YJ-Jiacha9	Ia	Modern landraces	cultivation type	Camellia sinensis	G4	landraces	Yinjiang County.Guizhou Province	0.240887	remove	remove	remove
GZ143	185	TL-1BANMUSHU-9	Ia	Ancient landraces	cultivation type	Camellia sinensis	G7	Ancient cultivar shrub, more than two hundred years	Yinjiang County.Guizhou Province	0.263649	remove	remove	remove
GZ144	186	YJ-Jiacha10	Ia	Modern landraces	cultivation type	Camellia sinensis	G4	landraces	Yinjiang County.Guizhou Province	0.158923	kept	kept	kept
GZ145	187	YJ-Jiacha13	Ia	Modern landraces	cultivation type	Camellia sinensis	G4	landraces	Yinjiang County.Guizhou Province	0.240882	remove	remove	remove
GZ146	190	SANHE-YI	Ic	Wild tree	wild type	Camellia taliensis	G4	Ancient wild tree. more than one hundred years	Zhenfeng County.Guizhou Province	0.153029	kept	kept	kept
GZ147	192	GUANLINNEN-1	Ia	Ancient landraces	cultivation type	Camellia sinensis	G7	Ancient cultivar shrub, more than two hundred years	Dejiang County.Guizhou Province	0.166893	kept	kept	kept
GZ148	193	YZ-4	II	Wild tree	wild type	Camellia tachangensis ?	G2	Ancient wild tree. more than one hundred years	Guiding County.Guizhou Province	0.25393	kept	remove	remove
GZ149	194	YZ-2	II	Ancient landraces	cultivation type	Camellia sinensis	G1	Ancient cultivar shrub, more than two hundred years	Guiding County.Guizhou Province	0.22947	kept	kept	kept
GZ150	195	XT1	Ia	Ancient landraces	cultivation type	Camellia sinensis	G11	Ancient cultivar shrub, more than two hundred years	Wuchuan County.Guizhou Province	0.217542	kept	kept	kept
GZ151	199	DZJC6	Ia	Ancient landraces	cultivation type	Camellia sinensis	G11	Ancient cultivar shrub, more than two hundred years	Wuchuan County.Guizhou Province	0.0719311	kept	kept	kept
GZ152	200	DZJC4	Ia	Ancient landraces	cultivation type	Camellia sinensis	G11	Ancient cultivar shrub, more than two hundred years	Wuchuan County.Guizhou Province	0.208641	kept	kept	kept
GZ153	201	DZJC2	Ia	Ancient landraces	cultivation type	Camellia sinensis	G11	Ancient cultivar shrub, more than two hundred years	Wuchuan County.Guizhou Province	0.205777	kept	kept	kept
GZ154	202	ZHENGAN1-1	Ia	Ancient landraces	cultivation type	Camellia sinensis ?	G11	Ancient cultivar shrub, more than two hundred years	zheng'an County.Guizhou Province	0.276392	kept	remove	remove
GZ155	203	ZHENGAN1-2	Ia	Wild tree	wild type	camellia remotiserrata	G3	Ancient wild tree. more than one hundred years	zheng'an County.Guizhou Province	0.16684	kept	kept	kept
GZ156	204	ZHENGAN2	Ia	Ancient landraces	cultivation type	Camellia sinensis	G4	Ancient cultivar shrub, more than two hundred years	zheng'an County.Guizhou Province	0.235451	remove	remove	remove
GZ157	205	QING4	Ib	Ancient landraces	cultivation type	Camellia sinensis	G1	Ancient cultivar shrub, more than one hundred years	Duyun City.Guizhou Province	0.140397	kept	kept	kept
GZ158	206	DAO1-5	Ia	Ancient landraces	cultivation type	Camellia sinensis	G7	Ancient cultivar shrub, more than two hundred years	Daozhen County Guizhou Province	0.280612	kept	kept	remove
GZ159	207	DZ2	Ia	Wild tree	wild type	camellia remotiserrata	G3	Ancient wild tree. more than one hundred years	Wuchuan County.Guizhou Province	0.308637	remove	remove	remove
GZ160	208	SH1-1(N469)	Ia	Wild tree	wild type	camellia remotiserrata	G10	Ancient wild tree. more than one hundred years	Wuchuan County.Guizhou Province	0.206512	remove	remove	remove
GZ161	209	SH1-1(N469-1)	Ia	Wild tree	wild type	camellia remotiserrata	G10	Ancient wild tree. more than one hundred years	Wuchuan County.Guizhou Province	0.160584	kept	kept	kept
GZ162	210	SH2	Ia	Wild tree	wild type	camellia remotiserrata	G10	Ancient wild tree. more than one hundred years	Wuchuan County.Guizhou Province	0.336019	kept	kept	remove
GZ163	211	SH3	Ia	Wild tree	wild type	camellia remotiserrata	G10	Ancient wild tree. more than one hundred years	Wuchuan County.Guizhou Province	0.297953	remove	remove	remove
GZ164	212	SH4	Ia	Wild tree	wild type	camellia remotiserrata	G3	Ancient wild tree. more than one hundred years	Wuchuan County.Guizhou Province	0.235674	remove	remove	remove
GZ165	213	SH1-2	Ia	Wild tree	wild type	camellia remotiserrata	G10	Ancient wild tree. more than one hundred years	Wuchuan County.Guizhou Province	0.249338	remove	remove	remove
GZ166	214	DZ2	Ia	Wild tree	wild type	camellia remotiserrata	G3	Ancient wild tree. more than one hundred years	Wuchuan County.Guizhou Province	0.252835	kept	kept	kept
GZ167	215	DZJC5	Ia	Wild tree	wild type	camellia remotiserrata	G3	Ancient wild tree. more than one hundred years	Wuchuan County.Guizhou Province	0.352085	remove	remove	remove
GZ168	216	A-Gongcha	II	Ancient landraces	cultivation type	Camellia sinensis	G4	Ancient cultivar shrub, more than two hundred years	Huaxi District.Guizhou Province	0.264501	remove	remove	remove
GZ169	217	DUOLAO	II	Ancient landraces	cultivation type	Camellia sinensis	G1	Ancient cultivar shrub (tea King) around 1000 years?	Puding County.Guizhou Province	0.132689	kept	kept	kept
GZ170	219	PUBAI-3YI	III	Wild tree	wild type	Camellia tachangensis	G2	Ancient wild tree. more than one hundred years	Puan County.Guizhou Province	0.122427	remove	remove	remove
GZ171	221	PUBAI-8YI	III	Wild tree	wild type	Camellia tachangensis	G2	Ancient wild tree. more than one hundred years	Puan County.Guizhou Province	0.107706	remove	remove	remove
GZ172	224	PUBAI10	III	Wild tree	wild type	Camellia tachangensis	G2	Ancient wild tree. more than one hundred years	Puan County.Guizhou Province	0.0920033	remove	remove	remove
GZ173	227	YI-1	II	Wild tree	wild type	Camellia tachangensis	G1	Natural offsprings of Ancient wild tree	Guiding County.Guizhou Province	0.229154	kept	kept	kept
GZ174	233	SANHE-8	Ic	Ancient landraces	cultivation type	Camellia sinensis ?	G7	Ancient cultivar shrub, more than two hundred years	Zhenfeng County.Guizhou Province	0.244676	kept	kept	kept
GZ175	234	SANHE-9	Ic	Ancient landraces	cultivation type	Camellia sinensis ?	G1	Ancient cultivar shrub, more than two hundred years	Zhenfeng County.Guizhou Province	0.256042	kept	kept	kept
GZ176	235	SANHE-10	Ic	Wild tree	wild type	Camellia tachangensis	G1	Natural offsprings of Ancient wild tree	Zhenfeng County.Guizhou Province	0.126986	kept	kept	kept
GZ177	237	SANHE(DNA99)	Ic	Wild tree	wild type	Camellia tachangensis?	G2	Natural offsprings of Ancient wild tree	Zhenfeng County.Guizhou Province	0.165345	kept	kept	kept
GZ178	239	SANHE7-2	Ic	Ancient landraces	cultivation type	Camellia sinensis	G7	Ancient cultivar shrub, more than two hundred years	Zhenfeng County.Guizhou Province	0.118815	kept	kept	kept
GZ179	240	SANHE-1	Ic	Ancient landraces	cultivation type	Camellia sinensis	G7	Ancient cultivar shrub, more than two hundred years	Zhenfeng County.Guizhou Province	0.208588	remove	remove	remove
GZ180	241	SANHE-2	Ic	Wild tree	wild type	Camellia tachangensis	G1	Ancient wild tree. more than one hundred years	Zhenfeng County.Guizhou Province	0.108716	kept	kept	kept
GZ181	244	SANHE7-3	Ic	Ancient landraces	cultivation type	Camellia sinensis	G1	Ancient cultivar shrub, more than two hundred years	Zhenfeng County.Guizhou Province	0.155218	kept	kept	kept
GZ182	245	SANHE-ZISEBIAN	Ic	Wild tree	wild type	Camellia tachangensis	G2	Ancient wild tree. more than one hundred years	Zhenfeng County.Guizhou Province	0.168972	kept	kept	kept+
GZ183	249	SANHE-7	Ic	Wild tree	wild type	Camellia tachangensis	G2	Ancient wild tree. more than one hundred years	Zhenfeng County.Guizhou Province	0.0867699	kept	remove	remove
GZ184	251	SANHE-9	Ic	Wild tree	wild type	Camellia tachangensis	G2	Ancient wild tree. more than one hundred years	Zhenfeng County.Guizhou Province	0.10922	kept	kept	kept
GZ185	252	SANHE-12	Ic	Wild tree	wild type	Camellia tachangensis	G2	Ancient wild tree. more than one hundred years	Zhenfeng County.Guizhou Province	0.207877	kept	remove	remove
GZ186	255	SANHE9ZA-2	Ic	Ancient landraces	cultivation type	Camellia sinensis	G12	Ancient cultivar shrub, more than one hundred years	Zhenfeng County.Guizhou Province	0.262717	remove	remove	remove
GZ187	258	GUANLIN-1(YI)	Ia	Ancient landraces	cultivation type	Camellia sinensis	G7	Ancient cultivar shrub, more than two hundred years	Dejiang County.Guizhou Province	0.220071	kept	kept	remove
GZ188	260	GUANLIN-3	Ia	Ancient landraces	cultivation type	Camellia sinensis	G7	Ancient cultivar shrub, more than two hundred years	Dejiang County.Guizhou Province	0.263207	kept	remove	remove
GZ189	261	GUANLIN-8	Ia	Ancient landraces	cultivation type	Camellia sinensis	G7	Ancient cultivar shrub, more than two hundred years	Dejiang County.Guizhou Province	0.210643	remove	remove	remove
GZ190	263	GUANLIN-12	Ia	Ancient landraces	cultivation type	Camellia sinensis	G7	Ancient cultivar shrub, more than two hundred years	Dejiang County.Guizhou Province	0.178724	kept	kept	kept
GZ191	265	DW-DAIDING(N542)	Ic	Ancient landraces	cultivation type	Camellia sinensis	G1	Ancient cultivar shrub, more than one hundred years	Xingyi City.Guizhou Province	0.239824	kept	kept	remove
GZ192	267	DAW0-6	Ic	Ancient landraces	cultivation type	Camellia sinensis	G1	Ancient cultivar shrub, more than one hundred years	Xingyi City.Guizhou Province	0.251255	kept	kept	kept
GZ193	268	DW-DAIDING(N545)	Ic	Ancient landraces	cultivation type	Camellia sinensis	G1	Ancient cultivar shrub, more than one hundred years	Xingyi City.Guizhou Province	0.242638	kept	kept	kept+
GZ194	269	DAWO5-2	Ic	Ancient landraces	cultivation type	Camellia sinensis	G12	Ancient cultivar shrub, more than one hundred years	Xingyi City.Guizhou Province	0.257993	kept	kept	remove
GZ195	270	GUANLINGXIAOYE	II	Ancient landraces	cultivation type	Camellia sinensis	G12	Ancient cultivar shrub, more than one hundred years	Guanling County.Guizhou Province	0.260274	kept	remove	remove
GZ196	272	GU20	Ic	Wild tree	wild type	Camellia tachangensis	G2	Ancient wild tree. more than one hundred years	Xingyi City.Guizhou Province	0.225264	remove	remove	remove
GZ197	273	GU2	Ic	Ancient landraces	cultivation type	Camellia sinensis	G4	Ancient cultivar shrub, more than five hundred years	Xingyi City.Guizhou Province	0.113781	kept	kept	kept
GZ198	274	GU3	Ic	Wild tree	wild type	Camellia tachangensis	G2	Ancient wild tree. more than one hundred years	Xingyi City.Guizhou Province	0.131839	remove	remove	remove
GZ199	275	GU5	Ic	Wild tree	wild type	Camellia tachangensis	G2	Ancient wild tree. more than one hundred years	Xingyi City.Guizhou Province	0.117778	remove	remove	remove
GZ200	279	GU-DAI	Ic	Wild tree	wild type	Camellia tachangensis	G1	Ancient wild tree. more than one hundred years	Xingyi City.Guizhou Province	0.142115	kept	remove	remove
GZ201	280	GU8	Ic	Ancient landraces	cultivation type	Camellia sinensis ?	G12	Ancient cultivar shrub, more than one hundred years	Xingyi City.Guizhou Province	0.191395	kept	kept	kept
GZ202	281	GU22	Ic	Ancient landraces	cultivation type	Camellia sinensis ?	G12	Ancient cultivar shrub, more than two hundred years	Xingyi City.Guizhou Province	0.213326	kept	kept	kept
GZ203	282	GU4	Ic	Wild tree	wild type	Camellia taliensis	G2	Ancient wild tree. more than one hundred years	Xingyi City.Guizhou Province	0.229631	kept	kept	kept
GZ204	283	GU18	Ic	Wild tree	wild type	Camellia tachangensis	G2	Ancient wild tree. more than one hundred years	Xingyi City.Guizhou Province	0.219937	remove	remove	remove
GZ205	284	GU-DAI(N562)	Ic	Ancient landraces	cultivation type	Camellia sinensis ?	G1	Ancient cultivar shrub, more than one hundred years	Xingyi City.Guizhou Province	0.223039	kept	kept	kept
GZ206	285	GU7	Ic	Ancient landraces	cultivation type	Camellia sinensis	G12	Ancient cultivar shrub, more than two hundred years	Xingyi City.Guizhou Province	0.259103	kept	kept	remove
GZ207	286	GU13	Ic	Wild tree	wild type	Camellia tachangensis	G2	Ancient wild tree. more than one hundred years	Xingyi City.Guizhou Province	0.265198	kept	remove	remove
GZ208	287	GU-DAI(N565)	Ic	Wild tree	wild type	Camellia tachangensis	G1	Ancient wild tree. more than one hundred years	Xingyi City.Guizhou Province	0.205093	kept	kept	remove
GZ209	288	GU-DAI(N566)	Ic	Wild tree	wild type	Camellia tachangensis	G2	Ancient wild tree. more than one hundred years	Xingyi City.Guizhou Province	0.131055	kept+	remove	kept+
GZ210	289	GU19	Ic	Wild tree	wild type	Camellia tachangensis	G2	Ancient wild tree. more than one hundred years	Xingyi City.Guizhou Province	0.222989	remove	remove	remove
GZ211	290	GU21	Ic	Wild tree	wild type	Camellia tachangensis	G2	Ancient wild tree. more than one hundred years	Xingyi City.Guizhou Province	0.289512	remove	remove	remove
GZ212	291	DW-7	Ic	Wild tree	wild type	Camellia taliensis	G2	Ancient wild tree. more than one hundred years	Xingyi City.Guizhou Province	0.298255	remove	remove	remove
GZ213	292	DW-DAI	Ic	Ancient landraces	cultivation type	Camellia sinensis	G4	Ancient cultivar shrub, more than two hundred years	Xingyi City.Guizhou Province	0.206068	kept	remove	remove
GZ214	293	DY-Yuancha	Ib	Modern landraces	cultivation type	Camellia sinensis	G4	landraces	Duyun City.Guizhou Province	0.26342	kept	remove	remove
GZ215	294	DW-DAIDING(574)	Ic	Ancient landraces	cultivation type	Camellia sinensis	G12	Ancient cultivar shrub, more than two hundred years	Xingyi City.Guizhou Province	0.226582	kept	kept	kept
GZ216	295	YUANCHA	Ib	Modern landraces	cultivation type	Camellia sinensis	G1	landraces	Duyun City.Guizhou Province	0.247574	kept	kept	kept
GZ217	296	SHITA-SHQ(576)	Ia	Modern landraces	cultivation type	Camellia sinensis	G1	landraces	Shiqian County.Guizhou Province	0.246096	kept	kept	kept
GZ218	297	SHITA-SHIPING1HAO	Ia	Modern landraces	cultivation type	Camellia sinensis	G5	landraces	Shiqian County.Guizhou Province	0.169662	kept	kept	kept
GZ219	298	SHITA-SHIPING-15	Ia	Modern landraces	cultivation type	Camellia sinensis	G1	landraces	Shiqian County.Guizhou Province	0.256955	kept	remove	remove
GZ220	299	SHITA-SHIDONG	Ia	Modern landraces	cultivation type	Camellia sinensis	G5	landraces	Shiqian County.Guizhou Province	0.273638	kept	remove	remove
GZ221	302	SHITA-SHIDONG-11	Ia	Modern landraces	cultivation type	Camellia sinensis	G5	landraces	Shiqian County.Guizhou Province	0.18976	kept	kept	kept
GZ222	303	SHITA-SHIDONG-10	Ia	Modern landraces	cultivation type	Camellia sinensis	G5	landraces	Shiqian County.Guizhou Province	0.151815	kept	kept	kept
GZ223	304	SHITA-SHITAI-DAIDING	Ia	Modern landraces	cultivation type	Camellia sinensis	G1	landraces	Shiqian County.Guizhou Province	0.18241	kept	kept	kept
GZ224	306	SHITA-SHIDONG-9(N586-1)	Ia	Modern landraces	cultivation type	Camellia sinensis	G5	landraces	Shiqian County.Guizhou Province	0.279471	kept	kept	remove
GZ225	307	SHITA-SHITAI-DAIDING(N585)	Ia	Modern landraces	cultivation type	Camellia sinensis	G5	landraces	Shiqian County.Guizhou Province	0.274497	kept	kept	remove
GZ226	309	GU11	Ic	Wild tree	wild type	Camellia tachangensis	G2	Ancient wild tree. more than one hundred years	Xingyi City.Guizhou Province	0.145338	kept	kept	kept
GZ227	311	SHITAI-3	Ia	Modern landraces	cultivation type	Camellia sinensis	G5	landraces	Shiqian County.Guizhou Province	0.353965	kept	kept	remove
GZ228	313	SHITAI-5	Ia	Modern landraces	cultivation type	Camellia sinensis	G5	landraces	Shiqian County.Guizhou Province	0.255689	kept	kept	kept+
GZ229	314	SHITAI-6	Ia	Modern landraces	cultivation type	Camellia sinensis	G5	landraces	Shiqian County.Guizhou Province	0.251752	kept	kept	remove
GZ230	316	XINGLAN-1	Ic	Wild tree	wild type	Camellia tachangensis	G2	Ancient wild tree. more than one hundred years	Xingyi City.Guizhou Province	0.236828	kept	remove	remove
GZ231	317	XINGLAN-3	Ic	Wild tree	wild type	Camellia tachangensis	G2	Ancient wild tree. more than one hundred years	Xingyi City.Guizhou Province	0.256519	remove	remove	remove
GZ232	318	LAO-S22-1	Ib	Ancient landraces	wild type	Camellia sinensis	G2	Ancient cultivar shrub, more than one hundred years	Liping County.Guizhou Province	0.191655	kept	kept	kept
GZ233	319	LAO-S22-2	Ib	Ancient landraces	cultivation type	Camellia sinensis	G5	Ancient cultivar shrub, more than one hundred years	Liping County.Guizhou Province	0.230686	kept	kept	kept
GZ234	320	LAO-S20-1	Ib	Ancient landraces	cultivation type	Camellia sinensis	G2	Ancient cultivar shrub, more than two hundred years	Liping County.Guizhou Province	0.257351	kept	remove	remove
GZ235	321	LAO-S20-2	Ib	Ancient landraces	cultivation type	Camellia sinensis	G5	Ancient cultivar shrub, more than two hundred years	Liping County.Guizhou Province	0.268158	remove	remove	remove
GZ236	323	LAO-S25	Ib	Ancient landraces	cultivation type	Camellia sinensis	G5	Ancient cultivar shrub, more than two hundred years	Liping County.Guizhou Province	0.152717	kept	kept	kept
GZ237	324	XINGLAN-5	Ic	Wild tree	wild type	Camellia tachangensis	G2	Ancient cultivar shrub, more than two hundred years	Xingyi City.Guizhou Province	0.0921212	remove	remove	remove
GZ238	326	LAO-S18	Ib	Ancient landraces	cultivation type	Camellia sinensis	G5	Ancient cultivar shrub, more than two hundred years	Liping County.Guizhou Province	0.177931	kept	kept	kept
GZ239	327	LEISHAN9	Ib	Ancient landraces	cultivation type	Camellia sinensis	G5	Ancient cultivar shrub, more than two hundred years	Liping County.Guizhou Province	0.250017	kept	kept	kept
GZ240	328	GU1	Ic	Wild tree	wild type	Camellia tachangensis ?	G2	Ancient wild tree. more than one hundred years	Xingyi City.Guizhou Province	0.258869	kept	kept	remove
GZ241	329	N627	Ic	Wild tree	wild type	Camellia taliensis ?	G2	Ancient wild tree. more than one hundred years	Xingyi City.Guizhou Province	0.271431	kept	kept	kept+
GZ242	330	DUYUNXIAOYEYUANCHA	Ib	Modern landraces	cultivation type	Camellia sinensis	G4	landraces	Duyun City.Guizhou Province	0.243154	remove	remove	kept+
GZ243	331	DUOBEI-1	II	Ancient landraces	cultivation type	Camellia sinensis	G1	Ancient cultivar shrub, more than one hundred years	Puding County.Guizhou Province	0.269078	kept	kept	remove
GZ244	333	DUOBEI-3	II	Ancient landraces	cultivation type	Camellia sinensis	G1	Ancient cultivar shrub, more than one hundred years	Puding County.Guizhou Province	0.285594	kept	remove	remove
GZ245	335	PUTUO-1	III	Wild tree	wild type	Camellia tachangensis	G2	Ancient wild tree. more than one hundred years	Puan County.Guizhou Province	0.159948	remove	remove	remove
GZ246	336	PUTUO-2	III	Wild tree	wild type	Camellia tachangensis	G2	Ancient wild tree. more than one hundred years	Puan County.Guizhou Province	0.156059	remove	remove	remove
GZ247	337	PUTUO-3	III	Wild tree	wild type	Camellia tachangensis	G2	Ancient wild tree. more than one hundred years	Puan County.Guizhou Province	0.126959	remove	remove	remove
GZ248	338	PUTUO-4	III	Wild tree	wild type	Camellia tachangensis	G2	Ancient wild tree. more than one hundred years	Puan County.Guizhou Province	0.126687	remove	remove	remove
GZ249	339	PUTUO-5	III	Wild tree	wild type	Camellia tachangensis	G2	Ancient wild tree. more than one hundred years	Puan County.Guizhou Province	0.119042	remove	remove	remove
GZ250	340	SANDU-LIANGFENG-1	Ib	Wild tree	wild type	Camellia tachangensis	G2	Ancient wild tree. more than one hundred years	Sandu County.Guizhou Province	0.0489757	kept	kept	kept
GZ251	341	SANDU-LIANGFENG-2	Ib	Wild tree	wild type	Camellia tachangensis	G2	Ancient wild tree. more than one hundred years	Sandu County.Guizhou Province	0.111475	remove	remove	remove
GZ252	342	SANDU-LIANGFENG-3	Ib	Wild tree	wild type	Camellia tachangensis	G2	Ancient wild tree. more than one hundred years	Sandu County.Guizhou Province	0.12244	remove	remove	remove
GZ253	343	SANDU-LIANGFENG-7	Ib	Wild tree	wild type	Camellia tachangensis	G2	Ancient wild tree. more than one hundred years	Sandu County.Guizhou Province	0.0948106	kept	remove	remove
GZ254	344	P19	Ib	Wild tree	wild type	Camellia tachangensis	G2	Ancient wild tree. more than one hundred years	Sandu County.Guizhou Province	0.127154	remove	remove	remove
GZ255	345	P21	Ib	Wild tree	wild type	Camellia tachangensis	G2	Ancient wild tree. more than one hundred years	Sandu County.Guizhou Province	0.127116	remove	remove	remove
GZ256	346	P25	Ib	Wild tree	wild type	Camellia tachangensis	G2	Ancient wild tree. more than one hundred years	Sandu County.Guizhou Province	0.136416	remove	remove	remove
GZ257	347	P26	Ib	Wild tree	wild type	Camellia tachangensis	G2	Ancient wild tree. more than one hundred years	Sandu County.Guizhou Province	0.130505	remove	remove	remove
GZ258	348	PUAN-DIGUA	III	Wild tree	wild type	Camellia tachangensis	G2	Ancient wild tree. more than one hundred years	Puan County.Guizhou Province	0.110786	remove	remove	remove
GZ259	349	PUAN-JIANGXIBO	III	Wild tree	wild type	Camellia tachangensis	G2	Ancient wild tree. more than one hundred years	Puan County.Guizhou Province	0.115919	remove	remove	remove
GZ260	350	MO(GUIDINGNIAOWANGZHONG)	II	Ancient landraces	cultivation type	Camellia sinensis	G4	Ancient cultivar shrub, more than two hundred years	Guiding County.Guizhou Province	0.238403	kept	remove	remove
GZ261	353	MUCHENG30	IV	Ancient landraces	cultivation type	Camellia sinensis	G5	Ancient cultivar shrub, more than one hundred years	Shuicheng County.Guizhou Province	0.232951	kept	remove	remove
GZ262	354	MUCHENG34	IV	Ancient landraces	cultivation type	Camellia sinensis	G4	Ancient cultivar shrub, more than one hundred years	Shuicheng County.Guizhou Province	0.245979	kept	remove	remove
GZ263	355	MUCHENG31	IV	Ancient landraces	cultivation type	Camellia sinensis	G5	Ancient cultivar shrub, more than one hundred years	Shuicheng County.Guizhou Province	0.250978	remove	remove	remove
GZ264	356	QL1	III	Wild tree	wild type	Camellia tachangensis	G2	Ancient wild tree. more than one hundred years	Qinglong County.Guizhou Province	0.286957	remove	remove	remove
GZ265	357	JINSHA	Ia	Wild tree	wild type	camellia remotiserrata ?	G3	Ancient wild tree. more than one hundred years	Jinsha County.Guizhou Province	0.303885	kept	remove	remove
GZ266	358	NY-SHD	IV	Wild tree	wild type	Camellia tachangensis	G2	Ancient wild tree. more than one hundred years	Nayong County.Guizhou Province	0.123058	kept+	remove	kept+
GZ267	361	HUISHUIGULU201510	II	Ancient landraces	cultivation type	Camellia sinensis	G5	Ancient cultivar shrub, more than two hundred years	Huishui County.Guizhou Province	0.263363	kept	kept	kept+
GZ268	362	HUISHUIBAIXIANG201510	II	Wild tree	wild type	Camellia tachangensis?	G2	Ancient wild tree. more than one hundred years	Huishui County.Guizhou Province	0.279808	kept	remove	remove
GZ269	363	HUISHUIBAIXIANG201509	II	Wild tree	wild type	Camellia tachangensis	G2	Ancient wild tree. more than one hundred years	Huishui County.Guizhou Province	0.139907	remove	remove	remove
GZ270	364	HUISHUIGULU201501	II	Ancient landraces	cultivation type	Camellia sinensis	G5	Ancient cultivar shrub, more than two hundred years	Huishui County.Guizhou Province	0.261348	kept	kept	kept+
GZ271	365	WUCHUANHUANGDU3	Ia	Wild tree	wild type	camellia remotiserrata	G3	Ancient wild tree. more than one hundred years	Wuchuan County.Guizhou Province	0.253852	kept	kept	remove
GZ272	366	HUISHUIBAIXIANG07（JIA）	II	Wild tree	wild type	Camellia tachangensis	G2	Ancient wild tree. more than one hundred years	Huishui County.Guizhou Province	0.133356	remove	remove	remove
GZ273	367	HUISHUIBAIXIANG201504	II	Wild tree	wild type	Camellia tachangensis	G2	Ancient wild tree. more than one hundred years	Huishui County.Guizhou Province	0.13479	kept	kept	kept
GZ274	368	HUISHUIGULU201503	II	Wild tree	wild type	Camellia tachangensis	G2	Ancient wild tree. more than one hundred years	Huishui County.Guizhou Province	0.105013	remove	remove	remove
GZ275	369	HUISHUIGULU201504	II	Wild tree	wild type	Camellia tachangensis	G2	Ancient wild tree. more than one hundred years	Huishui County.Guizhou Province	0.111668	remove	remove	remove
GZ276	370	HUISHUI-WEIZHI	II	Ancient landraces	cultivation type	Camellia sinensis	G5	Ancient cultivar shrub, more than two hundred years	Huishui County.Guizhou Province	0.256053	kept	kept	kept
GZ277	372	ZHENFENG4	Ic	Ancient landraces	cultivation type	Camellia sinensis	G1	Ancient cultivar shrub, more than two hundred years	Zhenfeng County.Guizhou Province	0.304495	kept	kept	kept
GZ278	374	YANHE2333	Ia	Ancient landraces	cultivation type	Camellia sinensis	G1	Ancient cultivar shrub, more than one hundred years	Yanhe County.Guizhou Province	0.238286	kept	kept	kept
GZ279	375	YANHE691	Ia	Ancient landraces	cultivation type	Camellia sinensis	G6	Ancient cultivar shrub, more than one hundred years	Yanhe County.Guizhou Province	0.242398	kept	kept	kept
GZ280	376	YANHE700	Ia	Ancient landraces	cultivation type	Camellia sinensis	G6	Ancient cultivar shrub, more than one hundred years	Yanhe County.Guizhou Province	0.254061	kept	kept	kept+
GZ281	377	YANHE00962	Ia	Ancient landraces	cultivation type	camellia remotiserrata	G3	Ancient cultivar shrub, more than one hundred years	Yanhe County.Guizhou Province	0.294628	kept	remove	remove
GZ282	378	YANHE3047	Ia	Ancient landraces	cultivation type	Camellia sinensis	G6	Ancient cultivar shrub, more than one hundred years	Yanhe County.Guizhou Province	0.288085	kept	remove	remove
GZ283	379	YANHE1125	Ia	Ancient landraces	cultivation type	Camellia sinensis	G6	Ancient cultivar shrub, more than one hundred years	Yanhe County.Guizhou Province	0.252095	kept	kept	remove
GZ284	380	YANHE05	Ia	Ancient landraces	cultivation type	Camellia sinensis	G6	Ancient cultivar shrub, more than one hundred years	Yanhe County.Guizhou Province	0.289578	kept	remove	remove
GZ285	381	YANHE0001	Ia	Ancient landraces	cultivation type	Camellia sinensis	G6	Ancient cultivar shrub, more than one hundred years	Yanhe County.Guizhou Province	0.280804	kept	kept	remove
GZ286	382	MUCHENG32	IV	Ancient landraces	cultivation type	Camellia sinensis	G5	Ancient cultivar shrub, more than one hundred years	Shuicheng County.Guizhou Province	0.222333	kept	kept	kept
GZ287	383	LIUZHI1	III	Ancient landraces	cultivation type	Camellia sinensis	G1	Ancient cultivar shrub, more than one hundred years	Liuzhi County.Guizhou Province	0.268945	kept	kept	kept
GZ288	384	SHAZI4-2015	III	Ancient landraces	cultivation type	Camellia sinensis	G1	Ancient cultivar shrub, more than one hundred years	Qinglong County.Guizhou Province	0.255708	remove	remove	remove
GZ289	385	YANHE1053	Ia	Ancient landraces	cultivation type	Camellia sinensis	G8	Ancient cultivar shrub, more than one hundred years	Yanhe County.Guizhou Province	0.232687	kept	kept	kept
GZ290	386	YANHE01191	Ia	Ancient landraces	cultivation type	Camellia sinensis	G6	Ancient cultivar shrub, more than one hundred years	Yanhe County.Guizhou Province	0.263112	kept	kept	remove
GZ291	387	YANHE1487	Ia	Ancient landraces	cultivation type	Camellia sinensis	G6	Ancient cultivar shrub, more than one hundred years	Yanhe County.Guizhou Province	0.259317	kept	kept	remove
GZ292	388	YANHE1179	Ia	Ancient landraces	cultivation type	Camellia sinensis	G4	Ancient cultivar shrub, more than two hundred years	Yanhe County.Guizhou Province	0.257716	kept	remove	remove
GZ293	389	YANHE1128	Ia	Ancient landraces	cultivation type	Camellia sinensis	G6	Ancient cultivar shrub, more than one hundred years	Yanhe County.Guizhou Province	0.26801	kept	kept	remove
GZ294	390	HUISHUININGWANG-1	II	Wild tree	wild type	Camellia tachangensis	G2	Ancient wild tree. more than two hundred years	Huishui County.Guizhou Province	0.0408308	kept	kept	kept
GZ295	391	HUISHUININGWANG-2	II	Ancient landraces	cultivation type	Camellia sinensis	G5	Ancient cultivar shrub, more than two hundred years	Huishui County.Guizhou Province	0.265196	kept	kept	kept+
GZ296	392	HUISHUIMENGJIANG	II	Wild tree	wild type	Camellia tachangensis	G2	Ancient wild tree. more than two hundred years	Huishui County.Guizhou Province	0.124634	remove	remove	remove
GZ297	393	YANHE1095	Ia	Ancient landraces	cultivation type	Camellia sinensis	G14	Ancient cultivar shrub, more than one hundred years	Yanhe County.Guizhou Province	0.28118	kept	kept	kept
GZ298	394	TONGZIDA6	Ia	Wild tree	wild type	camellia tachangensis	G3	Ancient wild tree. more than two hundred years	Tongzi County.Guizhou Province	0.142493	remove	remove	remove
GZ299	395	YANHE668	Ia	Ancient landraces	cultivation type	Camellia sinensis	G6	Ancient cultivar shrub, more than two hundred years	Yanhe County.Guizhou Province	0.256268	kept	kept	kept+
GZ300	396	TONGZIDA5	Ia	Wild tree	wild type	camellia tachangensis	G3	Ancient wild tree. more than three hundred years	Tongzi County.Guizhou Province	0.145125	remove	remove	remove
GZ301	397	TONGZIDA2	Ia	Wild tree	wild type	camellia tachangensis	G3	Ancient wild tree. more than two hundred years	Tongzi County.Guizhou Province	0.159125	remove	remove	remove
GZ302	398	TONGZIDA4	Ia	Wild tree	wild type	camellia remotiserrata	G3	Ancient wild tree. more than two hundred years	Tongzi County.Guizhou Province	0.243501	kept	kept	kept
GZ303	399	YANHE1181	Ia	Ancient landraces	cultivation type	Camellia sinensis	G6	Ancient cultivar shrub, more than four hundred years	Yanhe County.Guizhou Province	0.239065	kept	kept	kept
GZ304	400	LANGDAI-xiaoye	III	Ancient landraces	cultivation type	Camellia sinensis	G1	Ancient cultivar shrub, more than one hundred years	Liuzhi County.Guizhou Province	0.285468	kept	kept	kept
GZ305	401	WUCHUANHUANGDU-1	Ia	Wild tree	wild type	camellia remotiserrata?	G3	Ancient wild tree. more than two hundred years	Wuchuan County.Guizhou Province	0.244843	kept	remove	remove
GZ306	402	YANHE00993	Ia	Ancient landraces	cultivation type	Camellia sinensis	G6	Ancient cultivar shrub, more than one hundred years	Yanhe County.Guizhou Province	0.268477	kept	kept	remove
GZ307	403	GUANLING-xiaoye	II	Ancient landraces	cultivation type	Camellia sinensis	G1	Ancient cultivar shrub, more than one hundred years	Guanling County.Guizhou Province	0.283974	remove	remove	remove
GZ308	404	CSH-HTP201509	Ia	Wild tree	wild type	camellia remotiserrata	G10	Ancient wild tree. more than one hundred years	ChishuiCounty.Guizhou Province	0.245027	kept	kept	kept
GZ309	406	HUISHUININGWANG201501	II	Wild tree	wild type	Camellia tachangensis	G3	Ancient wild tree. more than one hundred years	Huishui County.Guizhou Province	0.245276	kept	kept	kept
GZ310	407	RH-Xy-wd	Ia	Ancient landraces	cultivation type	Camellia sinensis	G1	Ancient cultivar shrub, more than one hundred years	Renhuai County.Guizhou Province	0.249707	kept	remove	remove
GZ311	409	SYQS D	III	Wild tree	wild type	Camellia tachangensis	G2	Ancient wild tree. more than one hundred years	Qinglong County.Guizhou Province	0.285747	remove	remove	remove
GZ312	410	SHAZIC	III	Ancient landraces	cultivation type	Camellia sinensis	G1	Ancient cultivar shrub, more than one hundred years	Qinglong County.Guizhou Province	0.234564	kept	kept	remove
GZ313	411	MUCHENG162	IV	Ancient landraces	cultivation type	Camellia sinensis	G6	Ancient cultivar shrub, more than three hundred years	Shuicheng County.Guizhou Province	0.273515	kept	kept	remove
GZ314	413	ZHIJIN-YMB201501	III	Modern landraces	cultivation type	Camellia sinensis	G4	landraces	Zhijin County.Guizhou Province	0.216911	kept	remove	remove
GZ315	414	SHAZI-C	III	Ancient landraces	cultivation type	Camellia sinensis	G1	Ancient cultivar shrub, more than one hundred years	Qinglong County.Guizhou Province	0.224359	kept	kept	remove
GZ316	415	TONGYAN1149	Ia	Wild tree	wild type	Camellia tachangensis	G3	Ancient wild tree. more than one hundred years	Yanhe County.Guizhou Province	0.234512	kept	kept	remove
GZ317	416	TONGYAN667	Ia	Ancient landraces	cultivation type	Camellia sinensis	G1	Ancient cultivar shrub, more than one hundred years	Yanhe County.Guizhou Province	0.2888	remove	remove	remove
GZ318	418	XISHUI-10yue	Ia	Ancient landraces	cultivation type	Camellia sinensis	G11	Ancient cultivar shrub, more than one hundred years	Xishui County.Guizhou Province	0.241155	remove	remove	remove
GZ319	419	XISHUI-6yue	Ia	Wild tree	wild type	camellia remotiserrata Zhang	G3	Ancient wild tree. more than two hundred years	Xishui County.Guizhou Province	0.324518	kept	kept	kept
GZ320	420	JINSHA-YCZ-MLZ	Ia	Ancient landraces	cultivation type	camellia remotiserrata Zhang	G9	Ancient cultivar shrub, more than one hundred years	Jinsha County.Guizhou Province	0.242152	kept	kept	kept
GZ321	421	HUISHUI-baixiang201506.05	II	Wild tree	wild type	Camellia tachangensis	G2	Ancient wild tree. more than one hundred years	Huishui County.Guizhou Province	0.133014	remove	remove	remove
GZ322	422	ZHIJIN-YMZBYJX	III	Modern landraces	cultivation type	Camellia sinensis	G4	landraces	Zhijin County.Guizhou Province	0.220106	kept	remove	remove
GZ323	423	WUCHUAN	Ia	Wild tree	wild type	Camellia tachangensis	G2	Ancient wild tree. more than one hundred years	Wuchuan County.Guizhou Province	0.119878	remove	remove	remove
GZ324	424	WUCHUAN-	Ia	Wild tree	wild type	camellia remotiserrata?	G3	Ancient wild tree. more than two hundred years	Wuchuan County.Guizhou Province	0.283442	kept	remove	remove
GZ325	425	JINSHA-YCZ201504	Ia	Ancient landraces	cultivation type	camellia remotiserrata?	G11	Ancient cultivar shrub, more than one hundred years	Jinsha County.Guizhou Province	0.279033	kept	remove	remove
GZ326	426	JINSHA-GH5313	Ia	Wild tree	wild type	camellia remotiserrata?	G3	Ancient wild tree. more than two hundred years	Jinsha County.Guizhou Province	0.273385	kept	remove	remove
GZ327	427	XSH-SL201507	Ia	Ancient landraces	cultivation type	Camellia sinensis	G11	Ancient cultivar shrub, more than one hundred years	Xishui County.Guizhou Province	0.249288	kept	kept	kept
GZ328	428	ZJZB201505	III	Ancient landraces	cultivation type	Camellia sinensis	G5	Ancient cultivar shrub, more than one hundred years	Zhijin County.Guizhou Province	0.226789	kept	kept	kept
GZ329	430	CSH-WTX201505	Ia	Ancient landraces	cultivation type	Camellia sinensis	G11	Ancient cultivar shrub, more than one hundred years	ChishuiCounty.Guizhou Province	0.249513	kept	kept	remove
GZ330	431	RH-Xy-201505	Ia	Wild tree	wild type	camellia remotiserrata	G11	Ancient wild tree. more than one hundred years	Renhuai County.Guizhou Province	0.332973	kept	remove	remove
GZ331	432	Daozhen-LL2	Ia	Wild tree	wild type	camellia remotiserrata	G3	Ancient wild tree. more than three hundred years	Daozhen County.Guizhou Province	0.199055	kept	kept	kept
GZ332	433	DZ4(SBSH)	Ia	Wild tree	wild type	camellia remotiserrata	G3	Ancient wild tree. more than one hundred years	Wuchuan County.Guizhou Province	0.190213	kept	kept	kept
GZ333	435	DZ6	Ia	Wild tree	wild type	Camellia tachangensis	G3	Ancient wild tree. more than one hundred years	Wuchuan County.Guizhou Province	0.0559552	kept	kept	kept
GZ334	437	JINSHA-GH201506-2	Ia	Wild tree	wild type	Camellia tachangensis	G3	Ancient wild tree. more than one hundred years	Jinsha County.Guizhou Province	0.135419	remove	remove	remove
GZ335	438	XSH-SL-9se	Ia	Ancient landraces	cultivation type	Camellia sinensis	G11	Ancient cultivar shrub, more than one hundred years	Xishui County.Guizhou Province	0.239718	kept	kept	kept
GZ336	439	RH-XT-SH	Ia	Modern landraces	cultivation type	Camellia sinensis	G4	landraces	Renhuai County.Guizhou Province	0.262083	kept	kept	kept
GZ337	440	SANHE(98)	Ic	Ancient landraces	cultivation type	Camellia sinensis	G6	Ancient cultivar shrub, more than one hundred years	Zhenfeng County.Guizhou Province	0.263383	remove	remove	remove
GZ338	441	JS-YC201503	Ia	Ancient landraces	cultivation type	Camellia sinensis	G11	Ancient cultivar shrub, more than one hundred years	Jinsha County.Guizhou Province	0.152315	kept	kept	kept
GZ339	442	ZJZB-YJY	III	Modern landraces	cultivation type	Camellia sinensis	G4	landraces	Zhijin County.Guizhou Province	0.245518	kept	kept	remove
GZ340	443	CSHMCB201509	Ia	Modern landraces	cultivation type	Camellia sinensis	G4	landraces	Chishui County.Guizhou Province	0.219072	kept	remove	remove
GZ341	444	XISHUI-SW	Ia	Wild tree	wild type	camellia remotiserrata	G3	Ancient wild tree. more than one hundred years	Xishui County.Guizhou Province	0.131994	kept	remove	remove
GZ342	445	TY01041	Ia	Ancient landraces	cultivation type	Camellia sinensis	G8	Ancient cultivar shrub, more than one hundred years	Yanhe County.Guizhou Province	0.176711	kept	kept	kept
GZ343	446	TY08	Ia	Ancient landraces	cultivation type	Camellia sinensis	G6	Ancient cultivar shrub, more than one hundred years	Yanhe County.Guizhou Province	0.250345	kept	kept	kept
GZ344	447	TZ-B1	Ia	Wild tree	wild type	camellia remotiserrata	G3	Ancient wild tree. around fIve hundred years	Tongzi County.Guizhou Province	0.144793	remove	remove	remove
GZ345	448	TZ-chongcha	Ia	Ancient landraces	cultivation type	Camellia sinensis	G11	Ancient cultivar shrub, more than one hundred years	Tongzi County.Guizhou Province	0.271893	kept	kept	remove
GZ346	449	TY00011	Ia	Ancient landraces	cultivation type	Camellia sinensis	G13	Ancient cultivar shrub, more than one hundred years	Yanhe County.Guizhou Province	0.253922	kept	kept	kept
GZ347	453	JINSHA-GH201510	Ia	Ancient landraces	cultivation type	camellia remotiserrata Zhang	G9	Ancient cultivar shrub, more than one hundred years	Jinsha County.Guizhou Province	0.246474	kept	kept	kept
GZ348	454	Daozhen-LL3	Ia	Modern landraces	cultivation type	Camellia sinensis	G4	landraces	Daozhen County.Guizhou Province	0.231177	kept	remove	remove
GZ349	455	MUCHENG29	IV	Ancient landraces	cultivation type	Camellia sinensis	G5	Ancient cultivar shrub, more than five hundred years	Shuicheng County.Guizhou Province	0.254313	kept	remove	remove
GZ350	456	MUCHENG33	IV	Ancient landraces	cultivation type	Camellia sinensis	G5	Ancient cultivar shrub, more than five hundred years	Shuicheng County.Guizhou Province	0.23027	remove	remove	remove
GZ351	457	LIUZHI2	III	Ancient landraces	cultivation type	Camellia sinensis	G1	Ancient cultivar shrub, around six hundred years	Liuzhi County.Guizhou Province	0.0796563	kept	kept	kept
GZ352	458	JINSHA-GH5310	Ia	Ancient landraces	cultivation type	Camellia sinensis	G5	Ancient cultivar shrub, more than one hundred years	Jinsha County.Guizhou Province	0.259405	kept	kept	kept
GZ353	459	JINSHA-GH150041	Ia	Wild tree	wild type	camellia remotiserrata	G9	Ancient wild tree. more than one hundred years	Jinsha County.Guizhou Province	0.281508	kept	kept	kept+
GZ354	460	JINSHA-YCZ201501	Ia	Wild tree	wild type	camellia remotiserrata	G3	Ancient wild tree. more than one hundred years	Jinsha County.Guizhou Province	0.256839	kept	kept	kept+
GZ355	461	XSH-SL201508	Ia	Ancient landraces	cultivation type	Camellia sinensis	G11	Ancient cultivar shrub, more than one hundred years	Xishui County.Guizhou Province	0.267246	remove	remove	remove
GZ356	462	XYQS-4	Ic	Wild tree	wild type	Camellia tachangensis	G2	Ancient wild tree. more than three hundred years	Xingyi City.Guizhou Province	0.141961	kept	kept	kept
GZ357	463	ZJZB-YJY201504	III	Ancient landraces	cultivation type	Camellia sinensis	G5	Ancient cultivar shrub, more than one hundred years	Zhijin County.Guizhou Province	0.246136	kept	remove	remove
GZ358	465	CSH-YHCG	Ia	Ancient landraces	cultivation type	Camellia sinensis	G11	Ancient cultivar shrub, more than one hundred years	ChishuiCounty.Guizhou Province	0.20124	kept	kept	kept
GZ359	466	JINSHA-GH5312	Ia	Wild tree	wild type	camellia remotiserrata	G3	Ancient wild tree. more than one hundred years	Jinsha County.Guizhou Province	0.307983	kept	remove	remove
GZ360	467	ChishuiQT201503	Ia	Ancient landraces	cultivation type	Camellia sinensis	G11	Ancient cultivar shrub, more than one hundred years	Chishui County.Guizhou Province	0.256454	kept	kept	kept
GZ361	468	JINSHA-YCZ201506	Ia	Modern landraces	cultivation type	Camellia sinensis	G4	landraces	Jinsha County.Guizhou Province	0.277162	kept	remove	remove
GZ362	469	QXGQGD201503	III	Modern landraces	cultivation type	Camellia sinensis	G4	landraces	Qixingguan District.Guizhou Province	0.251892	kept	remove	remove
GZ363	470	JINSHA-YMZB201506-3	Ia	Modern landraces	cultivation type	Camellia sinensis	G4	landraces	Jinsha County.Guizhou Province	0.263817	kept	kept	remove
GZ364	480	QXGQGD201502	III	Modern landraces	cultivation type	Camellia sinensis	G4	landraces	Qixingguan District.Guizhou Province	0.317323	kept	remove	remove
GZ365	481	QXG-QY-QGD201502	III	Modern landraces	cultivation type	Camellia sinensis	G4	landraces	Qixingguan District.Guizhou Province	0.215334	remove	remove	remove
GZ366	482	ZJZB201503	III	Modern landraces	cultivation type	Camellia sinensis	G4	landraces	Zhijin County.Guizhou Province	0.2212	remove	remove	remove
GZ367	483	NY-SHD201501(2)	IV	Wild tree	wild type	Camellia tachangensis	G2	Ancient wild tree. more than one hundred years	Nayong County.Guizhou Province	0.136845	remove	remove	remove
GZ368	484	QIXING201501	III	Wild tree	wild type	Camellia tachangensis	G3	Ancient wild tree. more than one hundred years	Qixingguan District.Guizhou Province	0.227084	kept	kept	kept
GZ369	485	JS-YC201502	Ia	Ancient landraces	cultivation type	Camellia sinensis	G11	Ancient cultivar shrub, more than one hundred years	Jinsha County.Guizhou Province	0.283519	kept	kept	remove
GZ370	486	NY-SHD201502	IV	Wild tree	wild type	Camellia tachangensis	G2	Ancient wild tree. more than one hundred years	Nayong County.Guizhou Province	0.13865	remove	remove	remove
GZ371	487	LP-ZB	Ib	Ancient landraces	cultivation type	Camellia sinensis	G5	Ancient cultivar shrub, more than one hundred years	Liping County.Guizhou Province	0.257822	kept	kept	kept
GZ372	488	LSJ4-2	Ib	Ancient landraces	cultivation type	Camellia sinensis	G5	Ancient cultivar shrub, more than one hundred years	Liping County.Guizhou Province	0.263832	remove	remove	remove
GZ373	489	LSJ-263	Ib	Ancient landraces	cultivation type	Camellia sinensis	G1	Ancient cultivar shrub, more than one hundred years	Liping County.Guizhou Province	0.221689	kept	kept	kept
GZ374	490	QLSZ1	III	Ancient landraces	cultivation type	Camellia sinensis	G1	Ancient cultivar shrub, more than one hundred years	Qinglong County.Guizhou Province	0.241859	kept	remove	remove
GZ375	491	QLSZ2	III	Ancient landraces	cultivation type	Camellia sinensis	G1	Ancient cultivar shrub, more than one hundred years	Qinglong County.Guizhou Province	0.264189	kept	remove	remove
GZ376	492	QLSZ-ZHZ	III	Ancient landraces	cultivation type	Camellia sinensis	G1	Ancient cultivar shrub, more than one hundred years	Qinglong County.Guizhou Province	0.225749	kept	kept	remove
GZ377	493	LIUZHI1	III	Ancient landraces	cultivation type	Camellia sinensis	G1	Ancient cultivar shrub, more than one hundred years	Liuzhi County.Guizhou Province	0.236066	kept	kept	remove
GZ378	494	QINGLONG6	III	Wild tree	wild type	Camellia tachangensis	G2	Ancient wild tree. more than one hundred years	Qinglong County.Guizhou Province	0.284216	kept	remove	remove
GZ379	495	SANHE10	Ic	Wild tree	wild type	Camellia tachangensis	G2	Ancient wild tree. more than one hundred years	Zhenfeng County.Guizhou Province	0.268838	kept	remove	remove
GZ380	496	SANHE1	Ic	Wild tree	wild type	Camellia tachangensis	G2	Ancient wild tree. more than one hundred years	Zhenfeng County.Guizhou Province	0.250206	kept	kept	remove
GZ381	497	SANHE6	Ic	Wild tree	wild type	Camellia tachangensis	G2	Ancient wild tree. more than one hundred years	Zhenfeng County.Guizhou Province	0.281904	remove	remove	remove
GZ382	498	SANHE8	Ic	Wild tree	wild type	Camellia tachangensis	G2	Ancient wild tree. more than one hundred years	Zhenfeng County.Guizhou Province	0.265168	kept	remove	remove
GZ383	499	TL1-4	II	Modern landraces	cultivation type	Camellia sinensis	G4	landraces	Huaxi District.Guizhou Province	0.237193	kept	remove	remove
GZ384	500	JIUAN-CHAWANG	II	Ancient landraces	cultivation type	Camellia sinensis	G5	Ancient cultivar shrub, around six hundred years	Huaxi District.Guizhou Province	0.254764	kept	kept	kept
GZ385	502	YQ-LJZ201503	Ia	Ancient landraces	cultivation type	Camellia sinensis	G11	Ancient cultivar shrub, more than one hundred years	Yuqing County.Guizhou Province	0.248724	remove	remove	remove
GZ386	503	\Niaowangcha08	II	Modern landraces	cultivation type	Camellia sinensis	G4	landraces	Guiding new city.Guizhou Province	0.154951	kept	kept	kept
GZ387	504	\Niaowangcha09	II	Modern landraces	cultivation type	Camellia sinensis	G5	landraces	Guiding new city.Guizhou Province	0.233839	kept	kept	kept
GZ388	505	\Niaowangcha01	II	Modern landraces	cultivation type	Camellia sinensis	G4	landraces	Guiding new city.Guizhou Province	0.237312	kept	remove	remove
GZ389	506	\Niaowangcha02	II	Modern landraces	cultivation type	Camellia sinensis	G4	landraces	Guiding new city.Guizhou Province	0.104437	kept	kept	kept
GZ390	507	\Niaowangcha04	II	Modern landraces	cultivation type	Camellia sinensis	G1	landraces	Guiding new city.Guizhou Province	0.153334	kept	kept	kept
GZ391	508	\Niaowangcha05	II	Modern landraces	cultivation type	Camellia sinensis	G1	landraces	Guiding new city.Guizhou Province	0.223855	kept	kept	kept
GZ392	509	\Niaowangcha03	II	Modern landraces	cultivation type	Camellia sinensis	G4	landraces	Guiding new city.Guizhou Province	0.265583	kept	kept	remove
GZ393	510	\Niaowangcha11	II	Modern landraces	cultivation type	Camellia sinensis	G11	landraces	Guiding new city.Guizhou Province	0.213842	kept	kept	kept
GZ394	511	\Niaowangcha07	II	Modern landraces	cultivation type	Camellia tachangensis	G2	landraces	Guiding new city.Guizhou Province	0.199256	kept	kept	kept
GZ395	512	\Niaowangcha12	II	Modern landraces	cultivation type	Camellia sinensis	G1	landraces	Guiding new city.Guizhou Province	0.265047	kept	kept	remove
GZ396	513	\Niaowangcha06	II	Modern landraces	cultivation type	Camellia sinensis	G1	landraces	Guiding new city.Guizhou Province	0.0647512	kept	kept	kept
GZ397	514	\Niaowangcha10	II	Modern landraces	cultivation type	Camellia sinensis	G4	landraces	Guiding new city.Guizhou Province	0.18579	kept	kept	kept
GZ398	515	Z0032	II	Ancient landraces	cultivation type	Camellia sinensis	G5	Ancient cultivar shrub, more than two hundred years	Guian new city.Guizhou Province	0.274814	kept	remove	remove
GZ399	516	Z003	II	Ancient landraces	cultivation type	Camellia sinensis	G5	Ancient cultivar shrub, more than two hundred years	Guian new city.Guizhou Province	0.256408	kept	kept	remove
GZ400	517	Z0031	II	Ancient landraces	cultivation type	Camellia sinensis	G5	Ancient cultivar shrub, more than two hundred years	Guian new city.Guizhou Province	0.239041	remove	remove	remove
GZ401	518	Z0807-1	II	Ancient landraces	cultivation type	Camellia sinensis	G5	Ancient cultivar shrub, more than two hundred years	Guian new city.Guizhou Province	0.153881	kept	kept	kept
GZ402	519	Z0031-2	II	Ancient landraces	cultivation type	Camellia sinensis	G5	Ancient cultivar shrub, more than two hundred years	Guian new city.Guizhou Province	0.227286	kept	kept	kept
GZ403	520	Z0807	II	Ancient landraces	cultivation type	Camellia sinensis	G5	Ancient cultivar shrub, more than two hundred years	Guian new city.Guizhou Province	0.274646	remove	remove	remove
GZ404	521	Z0029	II	Ancient landraces	cultivation type	Camellia sinensis	G5	Ancient cultivar shrub, more than two hundred years	Guian new city.Guizhou Province	0.264176	kept	remove	remove
GZ405	523	Z0879	II	Ancient landraces	cultivation type	Camellia sinensis	G5	Ancient cultivar shrub, more than two hundred years	Guian new city.Guizhou Province	0.201863	kept	kept	kept
GZ406	527	Z500	II	Ancient landraces	cultivation type	Camellia sinensis	G5	Ancient cultivar shrub, more than two hundred years	Guian new city.Guizhou Province	0.273188	kept	kept	remove
GZ407	540	Fudingdabaicha		breeding variety	cultivation type	Camellia sinensis	G4	Variety	Fujian Province	0.187485	kept	kept	kept+
GZ408	541	Longjingchangyecha		breeding variety	cultivation type	Camellia sinensis	G4	Variety	Zhejiang Province	0.189126	kept	kept	kept+
GZ409	542	Baojinghuangjincha		breeding variety	cultivation type	Camellia sinensis	G4	Variety	Hunan Province	0.15464	kept	kept	kept
GZ410	543	Tieguanyincha		breeding variety	cultivation type	Camellia sinensis	G4	Variety	Fujian Province	0.228733	kept	kept	kept+
GZ411	544	YQ-LJZ201501	Ia	Ancient landraces	cultivation type	Camellia sinensis	G11	Ancient cultivar shrub, more than one hundred years	Yuqing County.Guizhou Province	0.176367	kept	kept	remove
GZ412	545	YQ-LJZ201502	Ia	Ancient landraces	cultivation type	Camellia sinensis	G11	Ancient cultivar shrub, more than one hundred years	Yuqing County.Guizhou Province	0.166125	kept	kept	kept
GZ413	N10	Qiancha1		breeding variety	cultivation type	Camellia sinensis	G5	Variety	Guizhou Province	0.306181	kept	kept	kept
GZ414	N8	J8	II	Ancient landraces	cultivation type	Camellia sinensis	G1	Ancient cultivar shrub, more than two hundred years	Huaxi District.Guizhou Province	0.209061	kept	kept	kept+
GZ415	N9	J9-1	II	Ancient landraces	cultivation type	Camellia sinensis	G1	Ancient cultivar shrub, more than two hundred years	Huaxi District.Guizhou Province	0.246249	kept	kept	kept
