# Supplementary material for: Development of core-collections for Guizhou tea genetic resources and GWAS of leaf size using SNP developed by genotyping-by-sequencing
Source: PeerJ. 2020 Mar 13;8:e8572. doi: 10.7717/peerj.8572 (PMC7075365; doi:10.7717/peerj.8572)
Supplement: Table S2 [file peerj-08-8572-s008.xlsx]

## Sheet: Table S2
Table S2 Identity-by-state (IBS)-based genetic distance matrix for 415 accessions using 30,282 polymorphic SNPs.
Unit		1	2	3	4	5	6	7	8	9	10	11	12	13	14	15	16	17	18	19	20	21	22	23	24	25	26	27	28	29	30	31	32	33	34	35	36	37	38	39	40	41	42	43	44	45	46	47	48
	DNA ID
1	1
2	100	0.967391
3	101	0.201197	0.159174
4	102	0.228193	0.221357	0.559354
5	103	0.268276	0.28834	0.884761	0.637487
6	107	0.72772	0.761603	0.121671	0.205919	0.252983
7	108	0.32025	0.324062	0.368615	0.269678	0.466786	0.283858
8	109	0.351315	0.360668	0.360372	0.340135	0.525597	0.263493	1.79657
9	110	0.371457	0.385632	0.35466	0.332213	0.448014	0.255058	2.10811	1.81834
10	111	0.266315	0.305568	0.530924	0.351467	0.566233	0.241711	1.59145	1.80813	1.69995
11	112	0.36841	0.343326	0.497803	0.347057	0.557265	0.306414	1.92912	1.95966	1.78387	1.92777
12	113	0.377665	0.419918	0.32755	0.363932	0.538509	0.27909	1.85134	2.1512	1.8947	1.63956	1.96226
13	114	0.354122	0.356729	0.304486	0.291747	0.401545	0.258346	1.70497	1.64102	1.95704	1.42934	1.57807	1.67128
14	115	0.453999	0.380116	0.439394	0.371999	0.619867	0.292002	2.36962	1.98003	2.33227	1.77466	2.21733	2.13903	2.15067
15	116	0.375609	0.352823	0.374255	0.292237	0.517291	0.22883	2.26283	1.85918	2.26975	1.58942	1.9445	1.88894	1.89638	2.62187
16	117	0.452037	0.533694	0.377658	0.397614	0.632573	0.364905	2.3278	2.11345	2.26124	1.83442	2.14103	2.30947	2.17164	2.53073	2.938
17	118	0.35195	0.459957	0.366021	0.360017	0.583739	0.275479	1.84593	2.06599	1.80297	1.73227	2.088	2.1779	1.61787	2.24478	1.96278	2.32487
18	119	0.325348	0.378731	0.313135	0.305281	0.429007	0.236401	1.04283	1.2633	1.07749	1.15274	1.21113	1.31773	1.01255	1.27271	1.1558	1.37808	1.36024
19	12	0.42725	0.490992	0.107536	0.165159	0.340168	0.299984	0.368428	0.432729	0.346947	0.278832	0.347965	0.428094	0.29307	0.432926	0.382631	0.589175	0.444954	0.334524
20	120	0.524085	0.573943	0.272996	0.390156	0.467472	0.315457	1.19711	1.24724	1.27886	1.01682	1.13244	1.33464	1.14316	1.43404	1.30318	1.72915	1.32239	1.50332	0.513402
21	121	0.434291	0.482818	0.407541	0.368318	0.655593	0.261754	1.46063	1.71129	1.34898	1.51905	1.65176	1.66814	1.23853	1.72916	1.50781	1.83963	1.73398	2.11979	0.493903	1.74115
22	122	0.297013	0.347715	0.338439	0.323789	0.457868	0.188356	1.02965	1.17403	1.12688	1.15756	1.20264	1.2141	0.968253	1.21086	1.08417	1.36341	1.31841	1.39938	0.349089	1.3238	2.00005
23	123	0.336795	0.385566	0.354426	0.289756	0.527674	0.3211	1.19103	1.29619	1.18767	1.27842	1.35674	1.32327	1.07044	1.42454	1.31883	1.51505	1.43136	1.70377	0.431548	1.27506	2.28098	1.63784
24	124	0.518355	0.580061	0.410192	0.384869	0.697896	0.378973	2.13094	2.05175	1.90335	1.84175	2.08726	2.04347	1.79545	2.20533	2.04571	2.48833	2.08544	2.00368	0.53396	1.96414	3.65625	2.09616	2.23048
25	126	0.628412	0.718984	0.0972575	0.191523	0.357007	0.513351	0.332414	0.487999	0.418112	0.371016	0.404508	0.45847	0.42079	0.42669	0.377367	0.608032	0.434088	0.395651	0.501235	0.60669	0.491166	0.357975	0.366027	0.558448
26	127	0.710857	0.850648	0.111429	0.20116	0.169976	0.564293	0.226303	0.248573	0.247857	0.199434	0.299151	0.279575	0.247915	0.251085	0.248022	0.351212	0.238134	0.264292	0.23283	0.450972	0.312521	0.225129	0.209596	0.361335	0.487197
27	128	0.428441	0.448694	0.142442	0.173687	0.340217	0.317876	0.811476	0.37775	0.856204	0.274149	0.380563	0.381818	0.75929	0.9804	0.880762	0.876571	0.429593	0.301642	0.568464	0.75569	0.506731	0.327159	0.392497	0.795262	0.428188	0.27117
28	129	0.403689	0.40735	0.0893217	0.171638	0.336385	0.292689	0.321974	0.464738	0.361822	0.318429	0.358323	0.496285	0.292217	0.427762	0.367226	0.647825	0.5411	0.361147	0.673394	0.624281	0.576239	0.422929	0.528846	0.688081	0.607144	0.266363	0.551301
29	13	0.459474	0.550232	0.122052	0.182659	0.357032	0.375338	0.442992	0.565138	0.407622	0.331908	0.45893	0.515038	0.363771	0.551262	0.419318	0.678388	0.612246	0.444221	1.24704	0.688446	0.640769	0.435927	0.497747	0.673442	0.555693	0.28085	0.602437	0.675941
30	130	0.388789	0.458942	0.0426525	0.205319	0.221119	0.304893	0.455077	0.388734	0.461089	0.289504	0.319037	0.443754	0.398654	0.51736	0.490605	0.7789	0.459155	0.376793	0.431999	0.777089	0.516169	0.392798	0.392031	0.699526	0.512428	0.327047	0.647247	1.06569	0.505548
31	131	0.36075	0.406026	0.0767009	0.159421	0.287279	0.287329	0.333924	0.451525	0.338981	0.313472	0.348007	0.453447	0.297751	0.39949	0.351655	0.58796	0.506651	0.364613	0.703688	0.587153	0.541161	0.408431	0.4261	0.612706	0.654064	0.257967	0.561914	1.85942	0.66517	0.991545
32	132	0.505921	0.561271	0.0756985	0.244585	0.35975	0.376981	0.456014	0.595706	0.452459	0.415483	0.483987	0.651362	0.398425	0.571237	0.45954	0.774045	0.608323	0.469979	0.680459	0.757242	0.691552	0.472393	0.553963	0.824043	0.78472	0.351058	0.648694	1.51576	0.800072	1.17508	1.49533
33	133	0.518044	0.562999	0.105951	0.205848	0.381559	0.387235	0.679095	0.516749	0.762014	0.349446	0.458096	0.541988	0.63871	0.841654	0.726946	0.896452	0.567166	0.396067	0.662394	0.81206	0.612519	0.434534	0.516161	0.872439	0.640854	0.34977	1.07251	1.5675	0.679999	1.15652	1.32547	1.69536
34	134	0.42799	0.45634	0.105251	0.165858	0.278695	0.269554	0.74331	0.358069	0.786748	0.241678	0.324274	0.338732	0.655255	0.865267	0.753124	0.769565	0.380913	0.280475	0.50578	0.688164	0.397952	0.29038	0.363177	0.716496	0.42174	0.261028	1.26908	0.50069	0.543959	0.59723	0.467071	0.572473	0.979301
35	135	0.987871	0.956663	0.187862	0.227416	0.337958	0.747182	0.426179	0.440002	0.411186	0.41341	0.45517	0.435673	0.41182	0.49787	0.446797	0.550357	0.51496	0.410124	0.568094	0.503693	0.527119	0.413748	0.495514	0.668343	0.759945	0.643911	0.475724	0.563715	0.57704	0.437404	0.590479	0.673596	0.703531	0.475828
36	136	0.553957	0.589988	0.124661	0.174211	0.374068	0.414999	0.492609	0.529504	0.490019	0.324665	0.425555	0.513376	0.411647	0.546289	0.482701	0.637504	0.56072	0.412743	0.770212	0.679276	0.590835	0.414529	0.455799	0.721167	0.620819	0.360273	0.66639	0.589161	0.792917	0.528264	0.645561	0.785222	0.717341	0.587893	0.659205
37	137	0.61793	0.645211	0.133437	0.182459	0.439333	0.435962	0.484993	0.521199	0.506126	0.343181	0.438433	0.547281	0.467788	0.620564	0.497584	0.734222	0.585352	0.419828	0.807477	0.799249	0.659357	0.441603	0.522636	0.756142	0.694098	0.419747	0.72014	0.843112	0.906973	0.624748	0.816766	0.981297	0.923218	0.65556	0.67705	1.34308
38	138	0.337253	0.383547	0.0973318	0.164628	0.2066	0.269351	0.19065	0.271493	0.228798	0.179829	0.202687	0.249632	0.232518	0.236034	0.189482	0.317417	0.25201	0.20286	0.394761	0.356168	0.202319	0.219574	0.181862	0.234813	0.369701	0.361147	0.367683	0.339318	0.444742	0.337828	0.387062	0.451795	0.424286	0.318021	0.372393	0.824189	0.760321
39	139	0.583629	0.580826	0.14989	0.174254	0.39859	0.440695	0.513881	0.554517	0.473168	0.393394	0.498378	0.599545	0.436551	0.584221	0.501749	0.683191	0.569575	0.463114	0.788505	0.702496	0.642837	0.46365	0.502434	0.694859	0.664812	0.361108	0.638276	0.631081	0.822452	0.548913	0.701475	0.813991	0.778829	0.610105	0.734756	1.42374	1.50143	0.840568
40	140	0.495492	0.577343	0.0582489	0.141469	0.416292	0.322027	0.476201	0.580847	0.495157	0.374058	0.434355	0.65411	0.458382	0.576391	0.444963	0.755427	0.648663	0.504027	0.737	0.844017	0.693427	0.472411	0.554308	0.76399	0.669703	0.299141	0.675853	0.766602	0.857849	0.592285	0.715919	1.02153	0.825251	0.583724	0.641105	0.825696	1.07557	0.410503	0.903314
41	141	0.554625	0.629965	0.133957	0.158396	0.374088	0.425389	0.415854	0.430628	0.379821	0.303855	0.369797	0.465746	0.319126	0.476684	0.388789	0.57044	0.44368	0.323985	0.669843	0.545307	0.480857	0.381237	0.406922	0.615077	0.579364	0.358737	0.623094	0.59665	0.750607	0.449767	0.593198	0.752976	0.683278	0.497745	0.67086	1.34761	1.30609	0.834267	1.23694	0.772756
42	142	0.442887	0.416846	0.0644109	0.127822	0.276678	0.275192	0.319908	0.481198	0.339858	0.285803	0.357815	0.47861	0.282191	0.449303	0.351706	0.536711	0.477974	0.407645	0.59525	0.607427	0.540922	0.363156	0.478358	0.626077	0.512684	0.288759	0.55508	0.639173	0.651393	0.484723	0.621032	0.798704	0.699891	0.514735	0.523705	0.707359	0.769262	0.307082	0.739069	1.03062	0.684137
43	143	0.534497	0.505621	0.0674208	0.201198	0.339023	0.347359	0.424323	0.538723	0.463804	0.352739	0.454783	0.632708	0.423217	0.59797	0.490894	0.693282	0.593118	0.466083	0.683413	0.805097	0.718224	0.47755	0.606199	0.799212	0.687254	0.264441	0.674924	0.796812	0.760895	0.601479	0.710574	0.988002	0.839489	0.607474	0.634594	0.822228	1.00755	0.433597	0.933136	1.32906	0.769354	1.38174
44	144	0.225712	0.179431	0.748992	0.47372	0.662238	0.174702	0.417462	0.395882	0.44409	0.589512	0.552461	0.445517	0.388774	0.510427	0.465634	0.485997	0.429442	0.388211	0.0757415	0.31936	0.48379	0.393152	0.402548	0.537559	0.177716	0.129682	0.122147	0.0881263	0.131429	0.107012	0.0899365	0.117449	0.147412	0.174988	0.28224	0.138015	0.16559	0.13341	0.246921	0.0972795	0.1579	0.0857036	0.135105
45	145	0.251057	0.18674	0.922011	0.536073	0.806478	0.206729	0.563322	0.576148	0.566657	0.78933	0.72641	0.589632	0.476759	0.673712	0.612526	0.593293	0.597682	0.522584	0.122696	0.4288	0.658957	0.479551	0.519876	0.671915	0.166757	0.129729	0.158968	0.133278	0.17671	0.104369	0.144237	0.169928	0.188321	0.182066	0.311677	0.199198	0.208814	0.132946	0.305707	0.111698	0.24543	0.105653	0.154106	1.73845
46	146	0.415018	0.407132	0.52725	0.467333	0.695508	0.29993	0.513622	0.622345	0.608896	0.598841	0.588863	0.685249	0.583645	0.745772	0.639334	0.771689	0.677286	0.55673	0.448687	0.70069	0.702626	0.500727	0.555367	0.825931	0.453931	0.321402	0.366555	0.421766	0.491499	0.407942	0.445915	0.57141	0.485372	0.4175	0.479885	0.679015	0.67374	0.335189	0.614849	0.603566	0.552932	0.47859	0.594836	0.814161	1.24536
47	147	0.240945	0.144304	0.709547	0.436347	0.636862	0.177823	0.462232	0.409495	0.392922	0.647728	0.569202	0.440829	0.407589	0.520413	0.479373	0.426655	0.444528	0.374264	0.109266	0.233542	0.537471	0.357337	0.447455	0.549009	0.116433	0.0923764	0.109455	0.097691	0.131279	0.0790504	0.0821833	0.106634	0.114505	0.139724	0.291889	0.16938	0.148331	0.0934877	0.200511	0.0703064	0.206196	0.0901249	0.11521	1.10426	1.5659	0.908497
48	148	0.48395	0.453685	0.554346	0.445671	0.674077	0.360025	0.543792	0.63079	0.535305	0.624284	0.634939	0.644013	0.48546	0.69936	0.62674	0.709104	0.708147	0.541141	0.425925	0.630707	0.749296	0.531229	0.565385	0.871619	0.44486	0.323895	0.344034	0.385916	0.50238	0.365391	0.419587	0.578699	0.476713	0.364167	0.555654	0.742682	0.771761	0.373764	0.766418	0.566729	0.750962	0.452113	0.565213	0.86211	1.21767	1.42753	1.04598
49	149	0.422376	0.421912	0.540984	0.438893	0.715315	0.266371	0.642454	0.739466	0.655713	0.681719	0.695059	0.717791	0.59318	0.855496	0.727668	0.894381	0.785153	0.604662	0.502718	0.741922	0.878213	0.637246	0.643998	0.934864	0.452189	0.267231	0.461184	0.482425	0.60165	0.442871	0.485217	0.641956	0.628368	0.43521	0.553741	0.672527	0.774219	0.329252	0.776927	0.669643	0.628115	0.49933	0.668064	0.850633	1.3714	1.54572	1.00932	2.31767
50	15	0.577217	0.665042	0.0938606	0.213404	0.407046	0.406669	0.549744	0.695642	0.554747	0.393375	0.567251	0.729013	0.487151	0.651289	0.547948	0.91037	0.791786	0.617856	1.22801	1.01295	0.854506	0.64363	0.628552	1.0022	0.781786	0.406301	0.763494	0.958701	1.28629	0.841585	0.911515	1.15524	0.912127	0.703918	0.765582	1.01266	1.12497	0.504124	1.0359	1.24438	0.840401	0.955608	1.14358	0.151683	0.147669	0.683327	0.124284	0.728768
51	150	0.160236	0.106952	0.66557	0.44643	0.555642	0.178774	0.300948	0.336476	0.29937	0.475124	0.418664	0.323353	0.300317	0.354181	0.30547	0.336218	0.308179	0.311226	0.0647223	0.291279	0.333111	0.30712	0.291212	0.34296	0.108241	0.130048	0.101441	0.0501018	0.0586826	0.0723897	0.0478603	0.0623982	0.0705112	0.0942878	0.214458	0.130037	0.0939554	0.112496	0.144561	0.036629	0.118393	0.0262351	0.0732311	0.910096	1.21951	0.82674	0.9713	0.872119
52	151	0.398089	0.428183	0.518711	0.427528	0.665775	0.294858	0.601289	0.623812	0.573307	0.59618	0.644544	0.654927	0.522181	0.720066	0.604472	0.734376	0.744428	0.551769	0.427554	0.63449	0.795485	0.46757	0.570474	0.886839	0.451432	0.268845	0.402445	0.463816	0.459733	0.390078	0.432757	0.567838	0.489793	0.387652	0.481551	0.640045	0.732298	0.277682	0.676586	0.634123	0.607197	0.473743	0.616335	0.767662	1.10682	1.44344	0.986189	1.51484
53	152	0.160417	0.110564	0.644824	0.385725	0.468035	0.16687	0.280209	0.264244	0.269081	0.481649	0.413414	0.281688	0.299469	0.328744	0.282877	0.283704	0.268202	0.277552	0.0469947	0.177232	0.332418	0.267591	0.294145	0.279273	0.101773	0.106066	0.0692947	0.0441673	0.0726681	0.0623667	0.0508524	0.0614992	0.0652349	0.0939541	0.1812	0.0578468	0.0990651	0.0951273	0.129895	0.0502656	0.0993199	0.035316	0.0650599	1.13659	1.38838	0.637393	1.02511	0.716699
54	153	0.38849	0.385077	0.510139	0.406642	0.647664	0.25656	0.503664	0.572122	0.519982	0.530968	0.582349	0.589237	0.495636	0.699761	0.601669	0.720681	0.619419	0.490999	0.472732	0.576036	0.700588	0.497537	0.626665	0.781015	0.367781	0.21601	0.405346	0.475964	0.480073	0.382195	0.447708	0.569456	0.49776	0.34637	0.483683	0.646398	0.682384	0.367721	0.607577	0.533161	0.566731	0.387938	0.553416	0.769495	1.26891	1.65679	1.04418	1.2474
55	154	0.494249	0.470569	0.576557	0.444259	0.773889	0.381048	0.711019	0.714269	0.661289	0.760873	0.774629	0.727647	0.59927	0.80077	0.708484	0.865215	0.779008	0.616867	0.496301	0.748723	0.854998	0.591376	0.654669	0.954909	0.487805	0.327676	0.442289	0.484512	0.562091	0.357932	0.486217	0.65592	0.565956	0.43861	0.643039	0.747604	0.79308	0.347831	0.768799	0.671479	0.687362	0.534552	0.663958	0.941371	1.45206	1.76823	1.08981	2.32302
56	155	0.221502	0.167131	0.766823	0.408915	0.622583	0.188578	0.471433	0.45053	0.433268	0.589158	0.581071	0.440803	0.357292	0.573948	0.456826	0.452051	0.420754	0.366908	0.118651	0.226988	0.48643	0.348337	0.432941	0.482279	0.111601	0.101077	0.13469	0.117977	0.159683	0.0812795	0.123464	0.136301	0.147712	0.164673	0.267782	0.189719	0.165209	0.0989545	0.25014	0.104052	0.201585	0.109937	0.117738	1.3632	1.57022	0.751532	1.21715	0.826816
57	157	0.355459	0.353077	0.444564	0.409683	0.501856	0.243201	0.410487	0.426084	0.417739	0.371625	0.455489	0.434636	0.396194	0.501866	0.457761	0.57864	0.496135	0.415094	0.271649	0.542647	0.471942	0.4016	0.360248	0.531822	0.298185	0.227637	0.293031	0.285579	0.364375	0.291806	0.30341	0.405978	0.383716	0.296586	0.358596	0.507745	0.511161	0.398764	0.580345	0.366826	0.524636	0.276301	0.385965	0.974218	0.914923	0.732353	0.523498	0.817438
58	161	0.218436	0.265113	0.377019	0.382196	0.423833	0.177069	0.338494	0.271795	0.351859	0.306333	0.365412	0.344801	0.272126	0.347349	0.328467	0.438501	0.320507	0.301267	0.198055	0.487712	0.326283	0.294958	0.263273	0.396355	0.203517	0.248197	0.196692	0.185708	0.270418	0.297489	0.192593	0.275624	0.260816	0.219189	0.241873	0.287825	0.35708	0.210125	0.390769	0.303033	0.274953	0.197373	0.272755	0.511531	0.60302	0.642773	0.449581	0.637703
59	168	0.465674	0.531369	0.0580563	0.157381	0.385442	0.291017	0.442141	0.519071	0.454693	0.339503	0.453916	0.586799	0.384874	0.57247	0.441101	0.706474	0.587313	0.456721	0.68956	0.732543	0.659732	0.458124	0.500217	0.749731	0.576949	0.3001	0.601905	0.744128	0.757769	0.58328	0.685077	0.846741	0.834443	0.606704	0.626378	0.772951	0.89067	0.373929	0.749483	1.0682	0.674839	0.780828	1.03596	0.105931	0.125935	0.566731	0.0985756	0.464147
60	171	0.51013	0.508211	0.067148	0.167136	0.381656	0.310231	0.408902	0.545909	0.447873	0.357724	0.419213	0.583121	0.436461	0.569618	0.429197	0.64357	0.599296	0.466572	0.714882	0.751057	0.72682	0.451022	0.449244	0.769302	0.635469	0.281741	0.633857	0.790648	0.786737	0.598777	0.745481	0.850518	0.852271	0.605826	0.635829	0.759123	0.962822	0.414262	0.853147	1.05281	0.679589	0.792068	1.0551	0.121758	0.144111	0.473032	0.104268	0.512133
61	172	0.414631	0.436903	0.0748422	0.162203	0.289897	0.317211	0.596736	0.408767	0.580245	0.245235	0.337021	0.4558	0.528923	0.695921	0.576644	0.744239	0.420971	0.304001	0.523048	0.67959	0.44122	0.318247	0.336982	0.716333	0.43369	0.209986	0.840934	0.542306	0.539789	0.501167	0.538225	0.645469	0.875941	0.816579	0.456376	0.59572	0.681844	0.282045	0.644667	0.813233	0.573724	0.620941	0.75311	0.087361	0.122443	0.370051	0.0668503	0.338563
62	173	0.442689	0.435995	0.121329	0.11308	0.333061	0.279561	0.563327	0.415179	0.624885	0.251885	0.357729	0.468519	0.566424	0.722646	0.627205	0.715247	0.439181	0.32967	0.570514	0.668523	0.582643	0.390548	0.450296	0.763638	0.512519	0.238762	0.930781	0.606908	0.657304	0.512504	0.546572	0.656926	0.876649	0.857706	0.536479	0.665409	0.800797	0.268273	0.70677	0.911158	0.58578	0.688673	0.80158	0.160776	0.182495	0.459585	0.119974	0.393003
63	177	0.238721	0.302792	0.0196007	0.184787	0.167769	0.219339	0.187805	0.32082	0.218773	0.182583	0.238079	0.382014	0.256416	0.238822	0.199895	0.466886	0.24772	0.311096	0.355074	0.514072	0.334795	0.243799	0.207611	0.413239	0.460234	0.295582	0.26101	0.425987	0.390775	0.496426	0.410195	0.52724	0.362866	0.221387	0.216513	0.304745	0.447722	0.362595	0.412842	0.509942	0.267448	0.331119	0.450916	0.0733533	0.0536704	0.300592	0.0171803	0.26536
64	178	0.490374	0.50465	0.0768597	0.214294	0.333244	0.305494	0.730408	0.520467	0.758522	0.325661	0.41277	0.514523	0.646475	0.898945	0.785764	0.898765	0.520822	0.391815	0.690708	2.14002	0.655668	0.384744	0.464731	0.909751	0.55717	0.315747	1.17704	0.712932	0.754718	0.623602	0.678929	0.789626	1.14129	1.08794	0.60978	0.829901	0.881987	0.337711	0.812913	1.01126	0.651647	0.735792	1.01459	0.110345	0.160139	0.494824	0.103451	0.485865
65	179	0.420112	0.449816	0.0591753	0.157307	0.256131	0.244721	0.537744	0.359134	0.534675	0.242767	0.307218	0.405693	0.513459	0.63161	0.569996	0.73511	0.406988	0.282325	0.485948	0.812828	0.443108	0.296224	0.31809	0.701296	0.469311	0.289308	0.841529	0.522518	0.560333	0.604239	0.510701	0.583347	0.89724	0.78055	0.439206	0.546519	0.662176	0.361131	0.614804	0.691758	0.502409	0.594888	0.670367	0.121964	0.113168	0.383579	0.0838326	0.327857
66	18	0.362849	0.472463	0.0697662	0.185983	0.259659	0.286642	0.351351	0.395604	0.374822	0.239323	0.317216	0.394143	0.301315	0.36857	0.301116	0.537162	0.406774	0.341117	0.952116	0.57455	0.438395	0.324404	0.345593	0.522155	0.470492	0.295865	0.454047	0.553605	1.25007	0.524403	0.579328	0.662159	0.561669	0.471622	0.427559	0.563727	0.620696	0.416177	0.561868	0.593522	0.578005	0.436554	0.588635	0.0829444	0.100855	0.388222	0.0544394	0.307803
67	180	0.344365	0.360283	0.0980902	0.131684	0.209915	0.252175	0.680885	0.310624	0.652818	0.236178	0.274691	0.296569	0.655793	0.745961	0.76416	0.780334	0.319312	0.250641	0.442891	0.632615	0.336692	0.259038	0.253801	0.665271	0.377168	0.241644	1.19215	0.43509	0.507015	0.498885	0.406486	0.492441	0.9099	1.09007	0.43059	0.502722	0.564012	0.228885	0.54369	0.507029	0.459323	0.435806	0.516607	0.103978	0.135617	0.359665	0.126583	0.287187
68	181	0.355798	0.364443	0.108728	0.117009	0.221188	0.273077	0.693155	0.300082	0.69857	0.228676	0.269491	0.328315	0.619088	0.776769	0.733243	0.740139	0.363607	0.232959	0.445306	0.641128	0.368696	0.271389	0.292774	0.655189	0.362048	0.230722	1.09799	0.465017	0.477458	0.462902	0.436225	0.524068	0.919829	1.03205	0.434647	0.534529	0.555321	0.254111	0.52272	0.532684	0.500864	0.436318	0.513943	0.105749	0.127476	0.347105	0.146229	0.30354
69	182	0.411134	0.484814	0.0624899	0.173587	0.302076	0.31211	0.681406	0.445781	0.724129	0.271518	0.412413	0.482056	0.631046	0.793798	0.754229	0.882563	0.501104	0.358324	0.633459	1.26219	0.611601	0.377216	0.457227	0.821803	0.522123	0.281604	1.10732	0.630759	0.67235	0.635407	0.612264	0.741697	1.14881	1.02701	0.551639	0.721078	0.828439	0.31352	0.72885	0.913566	0.624638	0.737959	0.874661	0.0979509	0.136621	0.487661	0.105421	0.442148
70	183	0.429375	0.49619	0.063322	0.157221	0.277184	0.255771	0.49534	0.358934	0.563303	0.246091	0.327561	0.459098	0.551371	0.654013	0.558519	0.797508	0.412713	0.353657	0.564038	0.73517	0.430686	0.335334	0.362113	0.63635	0.475823	0.266375	0.85545	0.614877	0.586177	0.58007	0.581627	0.679069	0.842386	0.819772	0.464664	0.601746	0.700023	0.334405	0.641382	0.770611	0.568084	0.559702	0.718857	0.120178	0.126942	0.478847	0.102178	0.376172
71	184	0.470568	0.448542	0.109894	0.103767	0.24489	0.303811	0.775689	0.370097	0.844984	0.284638	0.318857	0.427059	0.711036	0.905095	0.869547	0.85429	0.427688	0.319731	0.477032	0.786563	0.450173	0.31315	0.321974	0.726504	0.459997	0.270324	1.29086	0.535049	0.510416	0.592931	0.536252	0.612495	1.08251	1.20538	0.492213	0.612642	0.68753	0.247741	0.643983	0.646745	0.535758	0.538352	0.6251	0.142345	0.16273	0.443352	0.114536	0.353879
72	185	0.444222	0.502334	0.0520753	0.151752	0.326555	0.360749	0.348965	0.568958	0.382105	0.326584	0.411935	0.644852	0.353474	0.453169	0.370636	0.628955	0.711171	0.50997	0.715157	0.774509	0.678004	0.4737	0.552493	0.685932	0.620374	0.289638	0.560344	0.814727	0.75717	0.590364	0.746854	0.888592	0.82311	0.526608	0.582582	0.755157	0.893813	0.357103	0.755732	1.07059	0.654274	0.807329	0.991345	0.0551606	0.0969336	0.47075	0.0693753	0.437888
73	186	0.260536	0.347248	0.0123585	0.14921	0.145116	0.176563	0.131284	0.200411	0.166344	0.156496	0.158941	0.290512	0.181176	0.190785	0.173062	0.366694	0.244619	0.24888	0.342414	0.450702	0.274084	0.253973	0.169545	0.347484	0.388523	0.228737	0.205215	0.361299	0.377563	0.392578	0.336757	0.453376	0.348885	0.27359	0.245915	0.380686	0.415746	0.275238	0.418036	0.51696	0.307825	0.399261	0.470149	0.0597973	0.0416214	0.300192	0.00676343	0.24611
74	187	0.411976	0.486104	0.0438319	0.138929	0.280346	0.295724	0.341817	0.410141	0.357099	0.292548	0.371098	0.510999	0.34433	0.438632	0.34638	0.610438	0.531238	0.382023	0.639088	0.664092	0.578916	0.381674	0.393734	0.650218	0.575077	0.266642	0.480219	0.677093	0.697822	0.544934	0.60937	0.758252	0.681221	0.47995	0.493086	0.709812	0.771223	0.343303	0.727091	0.91491	0.596261	0.741995	0.944857	0.103376	0.10298	0.484974	0.0514886	0.434948
75	190	0.250921	0.266071	0.271089	0.388295	0.338889	0.175004	0.502529	0.54536	0.499	0.465779	0.506454	0.525102	0.526032	0.625143	0.546002	0.663694	0.538445	0.578749	0.208399	0.850374	0.650235	0.547681	0.536228	0.728069	0.239011	0.187608	0.244264	0.232871	0.233104	0.287065	0.217295	0.268122	0.252497	0.25586	0.29809	0.3099	0.272406	0.181844	0.280449	0.255493	0.257487	0.223068	0.272045	0.42888	0.389991	0.352982	0.308194	0.369732
76	192	0.244982	0.335165	0.0390069	0.161938	0.173446	0.202914	0.149168	0.314116	0.196516	0.174199	0.153912	0.350209	0.25431	0.246723	0.178491	0.421126	0.306353	0.300432	0.411002	0.494043	0.251044	0.289507	0.249527	0.332895	0.445403	0.242117	0.294433	0.466647	0.414101	0.510203	0.423911	0.487415	0.424255	0.256061	0.347457	0.412373	0.511905	0.322714	0.420503	0.509889	0.326168	0.367584	0.496545	0.0570837	0.0385235	0.313554	0.00370699	0.238888
77	193	0.434342	0.402822	0.542449	0.421691	0.670613	0.35154	0.541294	0.572282	0.575971	0.575551	0.629116	0.622948	0.493124	0.756034	0.648527	0.741384	0.704138	0.509597	0.422795	0.674805	0.746693	0.426092	0.586118	0.785814	0.373288	0.270274	0.465653	0.468325	0.506098	0.407949	0.397523	0.4567	0.524928	0.406031	0.529742	0.741965	0.69578	0.390813	0.747239	0.560179	0.661392	0.449663	0.535786	0.677001	0.876599	0.989404	0.630439	0.995225
78	194	0.445794	0.537106	0.079818	0.153097	0.321837	0.351147	0.369333	0.437284	0.348833	0.247456	0.358583	0.443075	0.332456	0.443795	0.419809	0.558603	0.441895	0.395055	0.566525	0.601665	0.502265	0.37155	0.436522	0.675906	0.559156	0.315462	0.571341	0.635476	0.658725	0.482716	0.606242	0.773977	0.621923	0.515669	0.567092	0.871003	0.884388	0.424665	0.840277	0.761279	0.813967	0.73718	0.759938	0.107255	0.136549	0.63349	0.135215	0.740458
79	195	0.364656	0.472005	0.0195945	0.149505	0.255337	0.313552	0.339317	0.48883	0.306841	0.308759	0.35032	0.459229	0.293097	0.369762	0.29218	0.568022	0.539527	0.333083	0.557725	0.548694	0.511984	0.385393	0.513618	0.594138	0.510064	0.247396	0.427518	0.643359	0.570487	0.477581	0.639849	0.773473	0.63039	0.433572	0.462684	0.550875	0.658856	0.276991	0.621628	0.727647	0.519829	0.532889	0.636381	0.0728758	0.0824907	0.368146	0.113503	0.403384
80	199	0.0828176	0.120399	0.0204575	0.0650457	0.0154653	0.0761832	0.0264827	0.0900962	0.0068443	0.0212869	0.0756253	0.11988	0.0386498	0.0175687	-0.0242047	0.0984029	0.0841287	0.117084	0.109023	0.139836	0.0364718	0.136005	0.0770266	0.120906	0.133274	0.133866	0.0266487	0.101539	0.0968319	0.196463	0.135055	0.181053	0.102168	0.0300278	0.0512186	0.124316	0.102879	0.0918904	0.10435	0.144557	0.0465385	0.123434	0.0754215	0.0508165	0.0235659	0.0696659	0.0126357	0.0123548
81	2	0.425992	0.533684	0.0705381	0.139366	0.381381	0.327295	0.398498	0.566628	0.457114	0.339575	0.449219	0.557994	0.410067	0.511197	0.464664	0.711454	0.607949	0.46115	0.753567	0.754849	0.641799	0.425967	0.458867	0.764673	0.688859	0.307745	0.610232	0.841542	0.833499	0.679024	0.775961	0.984864	0.836732	0.553837	0.589065	0.787344	0.94502	0.399648	0.907319	0.942396	0.713693	0.696902	0.976577	0.0987183	0.155913	0.523175	0.122417	0.523417
82	20	0.439518	0.499021	0.132555	0.164446	0.422968	0.294246	0.36356	0.434615	0.38214	0.295995	0.355976	0.510033	0.358675	0.487286	0.388604	0.655552	0.471106	0.395149	1.05472	0.555521	0.514973	0.400402	0.446794	0.592279	0.559186	0.268089	0.584556	0.63931	0.89428	0.483521	0.635937	0.783244	0.703626	0.46081	0.525476	0.752149	0.882149	0.4388	0.831846	0.775006	0.747539	0.585153	0.74594	0.146347	0.16537	0.52763	0.152339	0.529857
83	200	0.309	0.411634	0.0474267	0.150075	0.222043	0.229685	0.290618	0.412784	0.250923	0.229786	0.311662	0.438538	0.258339	0.305729	0.266302	0.506855	0.49869	0.395271	0.530002	0.615375	0.531113	0.415099	0.399744	0.586707	0.483722	0.224064	0.407908	0.673824	0.649315	0.556039	0.66781	0.716091	0.598979	0.393105	0.47288	0.477238	0.564659	0.288185	0.541551	0.757052	0.4431	0.526175	0.679647	0.0670453	0.100436	0.338499	0.0545336	0.308674
84	201	0.310256	0.392527	0.0408913	0.180881	0.221549	0.263214	0.303034	0.452981	0.291667	0.236502	0.317656	0.459406	0.249346	0.30844	0.285476	0.601856	0.442443	0.317453	0.50222	0.576441	0.500972	0.405795	0.431885	0.614735	0.464979	0.190686	0.411453	0.575682	0.59094	0.575615	0.576887	0.793057	0.551423	0.393935	0.40296	0.488442	0.603841	0.238211	0.534354	0.689985	0.49833	0.599709	0.607015	0.056496	0.0854247	0.345258	0.0736017	0.31256
85	202	0.421003	0.509718	0.0538312	0.130707	0.334131	0.345769	0.385805	0.626403	0.422467	0.325349	0.473612	0.734286	0.384186	0.471061	0.39149	0.738503	0.605652	0.468431	0.772994	0.833827	0.833352	0.579011	0.558274	0.886278	0.674976	0.268819	0.585638	0.841417	0.892754	0.635068	0.77606	1.05489	0.836664	0.529841	0.563702	0.728022	0.840547	0.346524	0.775573	1.07814	0.627002	0.78439	1.0083	0.0976221	0.130812	0.473125	0.0835013	0.490397
86	203	0.190778	0.304925	0.185351	0.296592	0.237263	0.199999	0.780022	0.876346	0.73443	0.710834	0.839136	0.900406	0.792165	0.802511	0.7445	1.10651	0.955329	0.852094	0.139443	1.07284	0.89128	0.803479	0.682484	1.15515	0.293974	0.196795	0.148568	0.176518	0.235919	0.354505	0.163988	0.272703	0.250823	0.157849	0.209252	0.19216	0.20664	0.181011	0.260483	0.243279	0.177396	0.201882	0.246768	0.276958	0.271993	0.340614	0.213759	0.301389
87	204	0.349294	0.442056	0.0117206	0.170435	0.242115	0.288497	0.307233	0.503855	0.321766	0.25434	0.343007	0.47157	0.357834	0.393816	0.318501	0.684693	0.614851	0.394919	0.550187	0.6472	0.526017	0.3445	0.384162	0.631386	0.627874	0.269192	0.439736	0.611327	0.65127	0.532631	0.585887	0.7995	0.583975	0.376314	0.493286	0.602999	0.650212	0.284948	0.588607	0.735431	0.534562	0.559643	0.66121	0.0765836	0.0723434	0.400167	0.0579366	0.368701
88	205	0.324468	0.383585	0.0431176	0.185193	0.11935	0.293272	0.193462	0.155462	0.193999	0.142737	0.180636	0.238467	0.255172	0.200091	0.191126	0.337509	0.226854	0.174025	0.276576	0.395135	0.202966	0.193485	0.158662	0.268362	0.34387	0.354044	0.314011	0.256747	0.362876	0.400341	0.259697	0.36185	0.315996	0.218716	0.28682	0.710011	0.891914	0.676671	0.653938	0.33823	0.743956	0.269538	0.395513	0.117559	0.0968565	0.319156	0.0797045	0.405284
89	206	0.42448	0.513193	0.10478	0.270454	0.373385	0.332334	0.424569	0.651608	0.456218	0.363615	0.455977	0.67004	0.427667	0.582028	0.445242	0.866699	0.660344	0.487841	0.601109	0.861585	0.629257	0.450215	0.488982	0.780217	0.683558	0.314034	0.557961	0.786616	0.726703	0.671354	0.744922	0.973056	0.785001	0.52265	0.585349	0.756247	0.853874	0.384394	0.753093	0.976238	0.640101	0.647596	0.855175	0.16794	0.181018	0.555128	0.129751	0.529058
90	207	0.380554	0.454939	0.388448	0.335294	0.595776	0.307829	1.47324	1.70661	1.43008	1.57324	1.69749	1.66426	1.32654	1.71663	1.53401	1.83595	1.78615	2.11679	0.449636	1.66545	3.00267	1.99457	2.34304	3.05281	0.482593	0.255385	0.457451	0.587359	0.572439	0.47763	0.540646	0.709882	0.655576	0.405169	0.55999	0.539661	0.57939	0.236177	0.601511	0.618053	0.487171	0.52484	0.702699	0.496274	0.640659	0.662995	0.479952	0.709878
91	208	0.284444	0.341511	0.201647	0.245627	0.359941	0.21917	0.684917	1.01695	0.73507	0.74233	1.02229	1.01892	0.671734	0.76712	0.799922	1.08342	1.02624	0.833668	0.278151	1.02153	1.01984	0.736989	0.797474	1.11902	0.36271	0.278762	0.250706	0.314769	0.416355	0.395947	0.356227	0.4187	0.366902	0.241146	0.325521	0.392458	0.410633	0.2604	0.380935	0.473708	0.346446	0.301062	0.420857	0.243561	0.320249	0.373099	0.174384	0.404652
92	209	0.208879	0.301766	0.1465	0.271526	0.234573	0.187024	0.50793	0.768165	0.575945	0.539305	0.782004	0.856241	0.546376	0.573071	0.528931	0.855977	0.750025	0.703674	0.169382	0.963876	0.722131	0.588575	0.556754	0.810325	0.313201	0.299575	0.160415	0.190368	0.275272	0.349033	0.188349	0.231617	0.218554	0.155502	0.217642	0.236325	0.272573	0.267626	0.268848	0.307668	0.206551	0.188768	0.238474	0.163492	0.197929	0.219214	0.121349	0.280149
93	21	0.445881	0.53865	0.120026	0.157587	0.37755	0.321848	0.403128	0.471387	0.408283	0.324085	0.399322	0.480511	0.339798	0.512736	0.412939	0.63131	0.481897	0.420668	1.04646	0.591264	0.589054	0.412887	0.467785	0.622867	0.533371	0.249579	0.587108	0.603534	0.91248	0.494173	0.59441	0.769464	0.695138	0.485478	0.50397	0.776591	0.896856	0.425271	0.838781	0.787395	0.71046	0.575705	0.75086	0.134262	0.162227	0.514704	0.13711	0.504593
94	210	0.432611	0.579938	0.249643	0.240044	0.521035	0.329934	0.972349	1.51236	0.930505	0.97701	1.35029	1.39293	0.948078	1.1132	1.02208	1.55074	1.30131	0.984129	0.691736	1.23353	1.42229	0.946533	1.04446	1.55015	0.66543	0.33716	0.607411	0.904243	0.909233	0.654057	0.836428	1.01076	0.896919	0.525236	0.703039	0.759606	0.906542	0.362043	0.83474	0.992132	0.685497	0.725726	0.981492	0.241486	0.35835	0.638846	0.243263	0.669154
95	211	0.423717	0.466507	0.195988	0.193676	0.439124	0.304701	0.803768	1.25779	0.783881	0.853641	1.0793	1.20001	0.705303	0.945002	0.824099	1.18899	1.13254	0.753553	0.604119	1.0288	1.23606	0.697415	0.928534	1.29135	0.628508	0.279682	0.567652	0.828095	0.831063	0.621754	0.862512	0.960893	0.858473	0.467449	0.650756	0.685749	0.82426	0.377463	0.810068	0.991262	0.672559	0.725905	0.955466	0.23506	0.303034	0.619254	0.227997	0.633588
96	212	0.333892	0.351411	0.485686	0.321757	0.579541	0.195157	1.28801	1.55564	1.23531	1.74533	1.78924	1.42581	1.16142	1.52737	1.40656	1.66798	1.60445	1.30215	0.370651	1.11083	1.71018	1.22787	1.44251	1.84184	0.404513	0.274427	0.372345	0.385883	0.468451	0.296842	0.383047	0.402309	0.429442	0.275101	0.41027	0.402604	0.438003	0.201433	0.475625	0.473467	0.302478	0.349658	0.4597	0.498526	0.671849	0.610436	0.543073	0.618704
97	213	0.341094	0.397665	0.318366	0.233482	0.519421	0.270675	0.886233	1.30545	0.951348	0.969523	1.25704	1.21929	0.804723	1.04331	0.987185	1.26456	1.23649	0.920659	0.50455	0.999912	1.35049	0.971239	1.11779	1.39963	0.48869	0.258599	0.424887	0.561727	0.582118	0.422798	0.555922	0.566534	0.54567	0.394307	0.466774	0.553757	0.612929	0.320903	0.532518	0.658105	0.464723	0.421179	0.568518	0.28216	0.388021	0.47083	0.29112	0.536689
98	214	0.344132	0.409415	0.403136	0.36848	0.527406	0.221309	1.18398	1.36904	1.28149	1.38069	1.43631	1.44753	1.11692	1.40491	1.27094	1.69256	1.50999	1.70209	0.348559	1.7236	2.09206	1.66095	1.6958	2.27364	0.44499	0.307327	0.358929	0.449301	0.409652	0.521478	0.422878	0.491006	0.445112	0.291743	0.42132	0.400884	0.45801	0.249552	0.465231	0.489195	0.329604	0.337611	0.486066	0.472704	0.539434	0.61796	0.419646	0.602284
99	215	0.48449	0.570959	0.277662	0.354894	0.574012	0.372212	1.28297	1.56788	1.32404	1.31543	1.48786	1.54896	1.23495	1.50604	1.30215	1.86579	1.60232	1.90219	0.614258	1.93086	2.50614	1.7768	1.96733	2.70477	0.73116	0.373922	0.593598	0.795279	0.720363	0.719763	0.718776	0.893783	0.813746	0.514783	0.670821	0.702981	0.872657	0.435005	0.750662	0.878381	0.627757	0.687966	0.949658	0.421895	0.491223	0.802877	0.347082	0.689328
100	216	0.461429	0.486065	0.0801433	0.162629	0.32419	0.319304	0.395734	0.566422	0.427403	0.402973	0.430649	0.566146	0.314712	0.475154	0.421467	0.737851	0.613915	0.437263	0.712908	0.656756	0.639611	0.424623	0.545558	0.74625	0.704333	0.285036	0.572811	2.09792	0.765572	1.72661	1.91304	2.37772	2.13527	0.471677	0.630368	0.718084	0.913191	0.420396	0.768912	0.836526	0.698424	0.720985	0.816728	0.084008	0.143699	0.509858	0.0720256	0.492012
101	217	0.247375	0.27631	0.0510438	0.156754	0.111989	0.175368	0.155257	0.208482	0.228172	0.100912	0.135662	0.23393	0.185921	0.206426	0.145977	0.253404	0.199177	0.238963	0.307534	0.307829	0.20338	0.191033	0.207891	0.227463	0.342265	0.230568	0.236633	0.333413	0.315271	0.378944	0.318842	0.32785	0.309989	0.257937	0.248495	0.323602	0.354214	0.313865	0.37019	0.392875	0.28447	0.273676	0.364873	0.0655997	0.0425285	0.245428	0.0221604	0.181778
102	219	0.202575	0.173127	1.06842	0.563003	0.861217	0.184942	0.423715	0.40759	0.423458	0.602008	0.536699	0.352306	0.340233	0.475093	0.448957	0.405835	0.437189	0.380986	0.0954528	0.317853	0.486115	0.375736	0.459372	0.493451	0.130557	0.12443	0.164155	0.106918	0.121652	0.0936025	0.107419	0.109093	0.168444	0.148172	0.274726	0.169663	0.160992	0.100512	0.183267	0.0931502	0.169448	0.106784	0.130939	0.836632	1.0378	0.614813	0.913218	0.622532
103	22	0.372056	0.42795	0.0700034	0.165489	0.246705	0.290631	0.292232	0.360368	0.295952	0.239186	0.289791	0.398361	0.327779	0.368874	0.345979	0.55759	0.429333	0.360837	0.583429	0.607228	0.417205	0.363172	0.343263	0.482927	0.487449	0.317381	0.433707	0.51722	0.620484	0.513613	0.463173	0.630798	0.577099	0.4176	0.516716	0.591558	0.677374	0.320219	0.56682	0.704374	0.506973	0.49262	0.637613	0.0818409	0.114032	0.431958	0.0757237	0.358034
104	221	0.165622	0.127702	0.987236	0.500069	0.780502	0.148749	0.335434	0.332325	0.33939	0.471833	0.464433	0.306099	0.261482	0.406693	0.38821	0.334953	0.338993	0.293553	0.0837882	0.255645	0.376982	0.338637	0.36079	0.356604	0.115997	0.123741	0.134453	0.0703992	0.103347	0.0662117	0.0654591	0.0708559	0.108344	0.101261	0.222796	0.134368	0.10125	0.0985394	0.144006	0.0598787	0.139752	0.0839246	0.0740421	0.752026	0.918371	0.493843	0.737285	0.487903
105	224	0.13754	0.126729	0.872879	0.504245	0.702804	0.107331	0.310146	0.303438	0.307114	0.446875	0.384862	0.282974	0.318006	0.347737	0.295662	0.330176	0.286017	0.313427	0.0449807	0.223443	0.307854	0.284616	0.292957	0.312866	0.102714	0.11471	0.0553543	0.0389088	0.0598878	0.042745	0.0541597	0.0210406	0.0649262	0.0699118	0.171135	0.0805839	0.0607363	0.0954754	0.0990654	0.0161737	0.0927903	0.0252049	0.0554503	0.72423	0.740798	0.408363	0.570513	0.380173
106	227	0.353556	0.452461	0.476361	0.364929	1.11019	0.273105	0.425507	0.493081	0.443813	0.467922	0.43242	0.513513	0.416112	0.586196	0.47473	0.595254	0.511857	0.427089	0.564437	0.544993	0.564503	0.427865	0.454749	0.672192	0.436668	0.224807	0.418868	0.551594	0.534209	0.347375	0.497219	0.565954	0.578565	0.399423	0.526496	0.576968	0.654945	0.332445	0.60011	0.619763	0.54398	0.466125	0.609727	0.34618	0.436353	0.652733	0.349217	0.585049
107	23	0.315275	0.305952	0.439527	0.303294	0.549582	0.184624	0.68069	0.801293	0.71653	0.765851	0.812589	0.793441	0.598196	0.874557	0.745314	0.918856	0.8648	0.684876	0.483363	0.737562	0.972263	0.708459	0.854592	0.998805	0.335169	0.160144	0.366542	0.503167	0.485359	0.321514	0.485279	0.517416	0.502433	0.330848	0.398091	0.447757	0.50071	0.207351	0.489603	0.469563	0.382436	0.433038	0.536931	0.434706	0.56909	0.594578	0.453814	0.623834
108	233	0.501493	0.522449	0.108478	0.181256	0.344359	0.454898	0.398681	0.548248	0.406792	0.304392	0.422052	0.554781	0.356431	0.519741	0.419841	0.600722	0.552185	0.468145	0.631923	0.663685	0.579842	0.425897	0.462821	0.706396	0.638841	0.315883	0.627888	0.696357	0.766773	0.492919	0.609636	0.839829	0.702262	0.520171	0.60855	0.741587	0.747966	0.382073	0.772124	0.825349	0.703489	0.708486	0.770259	0.116198	0.13316	0.449673	0.125974	0.556412
109	234	0.501825	0.512841	0.268934	0.347486	0.951873	0.40269	0.495254	0.550589	0.493779	0.370012	0.47396	0.562354	0.413137	0.60795	0.456742	0.676421	0.626081	0.491871	0.686019	0.719642	0.691685	0.38767	0.497973	0.790651	0.598948	0.286406	0.547068	0.632399	0.649172	0.438367	0.582971	0.759782	0.704398	0.49779	0.584604	0.696511	0.780344	0.406904	0.74177	0.809926	0.599818	0.704862	0.785138	0.244284	0.303762	0.524085	0.24887	0.593311
110	235	0.20638	0.240973	0.274341	0.360399	0.668353	0.152228	0.155371	0.217647	0.151892	0.208777	0.202053	0.244511	0.166503	0.213589	0.177413	0.26364	0.242645	0.232708	0.200505	0.352711	0.278673	0.194803	0.168677	0.283852	0.223886	0.155216	0.170389	0.161725	0.204687	0.19984	0.149185	0.187389	0.155019	0.106726	0.216965	0.202203	0.265515	0.171627	0.190222	0.240801	0.182354	0.191751	0.235929	0.226662	0.263504	0.279273	0.207588	0.23218
111	237	0.290196	0.259782	0.450494	0.433391	0.489473	0.203918	0.295817	0.336129	0.34055	0.367447	0.374658	0.349753	0.280722	0.372317	0.301346	0.431391	0.378232	0.35625	0.175597	0.458099	0.401991	0.254572	0.321727	0.453855	0.258716	0.215349	0.209015	0.257239	0.278154	0.270105	0.20092	0.346884	0.319491	0.197362	0.180082	0.233854	0.251067	0.203877	0.292163	0.282531	0.227915	0.243414	0.27041	0.443527	0.475742	0.479242	0.362003	0.44604
112	239	0.20118	0.275947	0.0469643	0.163693	0.143568	0.115751	0.0782888	0.14224	0.102177	0.118766	0.126213	0.204825	0.145878	0.11211	0.0949449	0.223192	0.168912	0.177316	0.227524	0.294393	0.165511	0.173728	0.105907	0.173216	0.314375	0.225227	0.196354	0.305121	0.27691	0.345372	0.29789	0.347448	0.241751	0.191424	0.189371	0.215504	0.301386	0.252271	0.233889	0.273255	0.18493	0.262571	0.314555	0.0562001	0.0489317	0.173645	0.0534749	0.0992458
113	24	0.325504	0.397817	0.414622	0.358006	0.490133	0.241668	0.742253	0.817425	0.736367	0.740203	0.843013	0.932471	0.694725	0.893159	0.7978	1.00504	0.905098	0.782692	0.380977	1.01747	1.00154	0.722823	0.803123	1.05037	0.412686	0.265829	0.371644	0.423388	0.49781	0.43311	0.442939	0.560441	0.494334	0.31123	0.376818	0.434189	0.531005	0.236848	0.51727	0.519648	0.407383	0.394778	0.552731	0.401565	0.551147	0.564479	0.386339	0.596184
114	240	0.309396	0.38069	0.0675956	0.144849	0.272506	0.265216	0.268691	0.382239	0.292457	0.293931	0.348452	0.432394	0.284013	0.34116	0.287009	0.45719	0.47	0.349537	0.544594	0.492196	0.487274	0.352182	0.400424	0.543528	0.504693	0.216895	0.44779	0.689518	0.659344	0.440212	0.667549	0.780395	0.601653	0.397487	0.476907	0.526262	0.64103	0.277814	0.580315	0.71151	0.519597	0.708514	0.729047	0.0872762	0.12777	0.374935	0.116563	0.317267
115	241	0.801927	0.697851	0.159193	0.200298	0.136615	0.59817	0.15148	0.142469	0.177399	0.179159	0.203349	0.178683	0.18802	0.187862	0.175684	0.178155	0.149976	0.191806	0.172929	0.198155	0.186966	0.158648	0.180101	0.23305	0.344534	0.574503	0.188009	0.118545	0.230626	0.191251	0.120593	0.161149	0.251163	0.217119	0.683661	0.312589	0.27284	0.235492	0.328001	0.181696	0.308733	0.187738	0.204461	0.219502	0.226981	0.235852	0.201017	0.353382
116	244	0.73187	0.817956	0.0642883	0.213265	0.144516	0.60692	0.15807	0.231791	0.210002	0.160312	0.209267	0.351193	0.218175	0.21445	0.194668	0.373405	0.317399	0.38474	0.253484	0.467239	0.255462	0.237958	0.231744	0.352131	0.46791	0.696785	0.214422	0.253812	0.369181	0.417683	0.214116	0.341145	0.357824	0.251698	0.672938	0.36135	0.330147	0.304773	0.382069	0.342311	0.339664	0.248595	0.330887	0.152578	0.116586	0.337353	0.0479421	0.288428
117	245	0.312725	0.299773	0.444904	0.426307	0.497288	0.221014	0.322864	0.372004	0.351691	0.333493	0.386475	0.349514	0.299606	0.390365	0.332719	0.425988	0.425973	0.344923	0.224851	0.49165	0.324749	0.310597	0.266198	0.44803	0.273591	0.25765	0.225319	0.17571	0.243825	0.294018	0.172465	0.250164	0.201456	0.172544	0.261682	0.379369	0.358105	0.254667	0.370264	0.224171	0.318991	0.205853	0.262538	0.48252	0.505864	0.544175	0.376919	0.552228
118	249	0.149062	0.108361	0.701115	0.531408	0.537395	0.132802	0.217704	0.227492	0.287532	0.384683	0.302257	0.237738	0.232494	0.276531	0.244188	0.219782	0.256331	0.256921	0.0277387	0.234474	0.271701	0.23771	0.249869	0.261204	0.0624634	0.121616	0.0957561	0.02791	0.0493091	0.0249554	0.0228265	0.0506959	0.0413668	0.0986332	0.152168	0.0731128	0.0461039	0.095893	0.0878576	-0.00441201	0.0928966	0.0211871	0.0355339	0.686764	0.793514	0.472905	0.639385	0.476159
119	25	0.413232	0.428886	0.500894	0.316093	0.712625	0.27169	0.972219	0.929358	0.963886	0.873584	0.91655	0.981916	0.884701	1.24828	1.08119	1.27622	0.984343	0.810451	0.546711	1.03137	1.19473	0.919026	1.07267	1.42528	0.473588	0.224593	0.775487	0.591023	0.577499	0.59472	0.575175	0.655068	0.846079	0.711724	0.561812	0.573805	0.665042	0.249561	0.66127	0.65989	0.509144	0.507064	0.742038	0.500386	0.680252	0.718002	0.53595	0.73754
120	251	0.137892	0.138235	0.306152	0.292215	0.283907	0.108789	0.152831	0.129533	0.156028	0.138362	0.134438	0.142389	0.16983	0.156549	0.113447	0.17741	0.146267	0.228185	0.10248	0.255266	0.156862	0.177225	0.163342	0.200482	0.102519	0.105459	0.0995547	0.114381	0.133175	0.141072	0.0896846	0.116039	0.0849717	0.111057	0.104969	0.129468	0.129215	0.124927	0.157587	0.101478	0.0891716	0.10054	0.111629	0.309427	0.306849	0.246138	0.191843	0.303185
121	252	0.377697	0.32905	0.593885	0.492655	0.639215	0.291625	0.48535	0.478797	0.43776	0.537469	0.51036	0.500401	0.419007	0.54434	0.463502	0.576433	0.607207	0.450201	0.300559	0.532424	0.612319	0.428136	0.503916	0.686821	0.309517	0.210492	0.304487	0.308845	0.454107	0.330965	0.340858	0.458337	0.416765	0.274643	0.40706	0.433129	0.421752	0.214314	0.433736	0.383873	0.426026	0.358904	0.420716	0.572474	0.705207	0.654463	0.579462	0.709844
122	255	0.384694	0.472735	0.0749212	0.142429	0.307619	0.323021	0.412056	0.512037	0.425746	0.33294	0.407195	0.584276	0.381935	0.479119	0.375388	0.671717	0.613573	0.418184	0.711164	0.708307	0.628169	0.460259	0.549418	0.737409	0.640395	0.263923	0.583544	0.824909	0.782446	0.629158	0.796614	1.02871	0.868749	0.523354	0.685028	0.718475	0.867747	0.345501	0.746333	1.01236	0.652501	0.71351	0.91943	0.129809	0.145626	0.514175	0.0907654	0.514557
123	258	0.354501	0.430405	0.063478	0.13538	0.274492	0.2573	0.299617	0.500453	0.343354	0.301391	0.347668	0.446161	0.266704	0.365509	0.309074	0.598452	0.518703	0.361661	0.584768	0.635892	0.552768	0.42741	0.443973	0.575097	0.543032	0.23293	0.452697	0.671311	0.567353	0.52162	0.595518	0.677944	0.625017	0.461187	0.479216	0.557695	0.630652	0.329367	0.561192	0.673168	0.557523	0.583411	0.657645	0.118062	0.113014	0.410183	0.0986209	0.372483
124	26	0.322445	0.365748	0.418114	0.340119	0.546957	0.28257	0.876023	1.03864	0.927777	0.914656	1.01139	0.978948	0.829242	1.02496	0.917789	1.12772	1.00151	0.818413	0.425789	0.920718	1.14867	0.822823	0.971486	1.28016	0.369824	0.222464	0.39249	0.487378	0.432622	0.466875	0.453706	0.559105	0.546438	0.316402	0.433724	0.446563	0.481458	0.216312	0.417909	0.524844	0.405588	0.413458	0.525394	0.448088	0.595102	0.590742	0.485968	0.640706
125	260	0.421459	0.547281	0.0524989	0.181473	0.348025	0.373068	0.406623	0.587921	0.374754	0.326666	0.4516	0.564955	0.321942	0.45881	0.392577	0.695332	0.605767	0.417277	0.627186	0.714308	0.764678	0.465303	0.550697	0.82389	0.644698	0.274363	0.529389	0.808993	0.735043	0.588801	0.694813	0.941109	0.765132	0.50777	0.580387	0.743888	0.746752	0.271538	0.67604	0.944925	0.656669	0.756865	0.892048	0.0629458	0.106132	0.448715	0.0995016	0.45744
126	261	0.304558	0.42662	0.0589145	0.166896	0.250239	0.256014	0.279951	0.442635	0.28264	0.228326	0.318971	0.444159	0.237139	0.290834	0.260164	0.515346	0.472037	0.372809	0.514952	0.597986	0.533045	0.396174	0.38938	0.525373	0.462288	0.270994	0.437039	0.623875	0.601001	0.550582	0.616104	0.693848	0.587316	0.381808	0.421489	0.531066	0.630759	0.28584	0.542396	0.757438	0.551343	0.521949	0.705495	0.0750441	0.0844094	0.382327	0.0402972	0.35479
127	263	0.283304	0.37165	0.0443431	0.142795	0.181927	0.197652	0.200759	0.372085	0.232638	0.167872	0.242494	0.344034	0.222837	0.243134	0.218071	0.394383	0.355969	0.312703	0.398998	0.468278	0.38127	0.30484	0.292575	0.416354	0.401921	0.251744	0.310721	0.492214	0.478619	0.469092	0.476173	0.569995	0.517237	0.301445	0.364594	0.466387	0.506403	0.300677	0.466699	0.543686	0.433242	0.461182	0.54862	0.0735665	0.052641	0.261287	0.0317997	0.275761
128	265	0.850433	1.01876	0.145693	0.192844	0.34166	0.769313	0.389102	0.490582	0.454282	0.378005	0.447997	0.514723	0.436125	0.482227	0.467227	0.652783	0.569294	0.409061	0.602656	0.642443	0.629945	0.405826	0.489712	0.731969	0.741858	0.678952	0.549471	0.599131	0.673368	0.489459	0.566829	0.754437	0.683051	0.476831	1.07772	0.690995	0.795265	0.346599	0.794077	0.663471	0.693667	0.568476	0.729841	0.188428	0.258412	0.51827	0.191038	0.584764
129	267	0.414428	0.562349	0.116199	0.241881	0.32783	0.346437	0.372698	0.470261	0.436822	0.316886	0.399121	0.587588	0.339862	0.483671	0.361087	0.714904	0.522197	0.485735	0.553429	0.841275	0.611295	0.431172	0.431955	0.660127	0.586938	0.357421	0.516299	0.674422	0.710546	0.698383	0.683641	0.842704	0.749664	0.51095	0.545225	0.688029	0.833074	0.452387	0.657017	0.871906	0.569625	0.572151	0.756131	0.112427	0.143652	0.494948	0.0845291	0.49639
130	268	0.755202	0.85779	0.146589	0.215432	0.380779	0.565336	0.41844	0.501834	0.497389	0.418618	0.445763	0.570168	0.400174	0.530913	0.498908	0.671365	0.557137	0.400468	0.623476	0.699632	0.684183	0.447359	0.481707	0.756151	0.698098	0.635287	0.58681	0.718876	0.675792	0.515385	0.680975	0.763539	0.756449	0.48095	0.866892	0.783003	0.854939	0.411265	0.768029	0.770659	0.743234	0.606449	0.782739	0.200476	0.27298	0.504247	0.209977	0.542495
131	269	0.378648	0.459267	0.0722547	0.135026	0.322805	0.302354	0.397846	0.517669	0.412518	0.318749	0.409264	0.58047	0.378016	0.484258	0.371841	0.648266	0.593808	0.395062	0.714304	0.690027	0.589281	0.44092	0.556287	0.714175	0.606907	0.248061	0.59498	0.809578	0.74826	0.60504	0.787786	1.01607	0.836488	0.541582	0.662779	0.67922	0.829895	0.344551	0.738512	1.00465	0.622222	0.713783	0.919124	0.108574	0.141992	0.504337	0.0805862	0.483766
132	27	0.53137	0.518745	0.53337	0.367941	0.72975	0.348773	1.25095	1.36228	1.25928	1.25801	1.35515	1.42501	1.1074	1.57214	1.29651	1.58229	1.49957	1.20894	0.564885	1.41005	1.74319	1.14465	1.37153	1.88547	0.551301	0.315836	0.573865	0.704098	0.718879	0.542912	0.654176	0.857312	0.785161	0.476162	0.647976	0.68635	0.778185	0.322067	0.67903	0.785315	0.553051	0.62457	0.827464	0.635707	0.841625	0.922177	0.600521	0.958035
133	270	0.419373	0.482695	0.0636777	0.152779	0.299489	0.344499	0.345401	0.553895	0.441771	0.309837	0.398843	0.616736	0.372566	0.499852	0.367233	0.683093	0.622127	0.463298	0.685697	0.694106	0.643609	0.366442	0.468153	0.677878	0.61062	0.26708	0.609399	0.815767	0.818671	0.639978	0.780735	1.02675	0.771645	0.477301	0.623286	0.775334	0.869449	0.394082	0.795978	0.917519	0.70489	0.72721	0.891557	0.10795	0.163499	0.499918	0.100067	0.46917
134	272	0.31547	0.330359	0.640155	0.399239	0.664085	0.267364	0.494463	0.545883	0.567987	0.541993	0.570719	0.537184	0.497984	0.606531	0.504396	0.664824	0.611195	0.503735	0.306543	0.632159	0.635978	0.501737	0.513725	0.718497	0.312118	0.228445	0.370409	0.41473	0.368221	0.31829	0.365132	0.478142	0.450825	0.364771	0.459805	0.436688	0.450414	0.240337	0.479302	0.429566	0.394512	0.377103	0.422593	0.580863	0.717033	0.683913	0.544955	0.612087
135	273	0.280636	0.410898	0.102487	0.174077	0.119799	0.253174	0.21078	0.0772484	0.210562	0.0507219	0.0765244	0.0978874	0.203474	0.23563	0.217842	0.258208	0.0705109	0.117269	0.214957	0.249881	0.125694	0.13591	0.132033	0.175166	0.217273	0.349887	0.347293	0.163187	0.199513	0.378099	0.215776	0.232117	0.327624	0.348434	0.264103	0.190398	0.227811	0.191979	0.165618	0.250711	0.195086	0.159122	0.214981	0.106557	0.0534898	0.220558	0.0660486	0.117019
136	274	0.242599	0.151216	1.01016	0.597567	0.802144	0.171033	0.46779	0.460829	0.489601	0.668377	0.581492	0.437259	0.391272	0.599417	0.469165	0.453857	0.483345	0.386095	0.127396	0.325213	0.520906	0.392979	0.44871	0.536734	0.132721	0.122619	0.149232	0.137727	0.162178	0.0725134	0.0985162	0.125062	0.164909	0.133428	0.259309	0.199838	0.177058	0.138981	0.215382	0.110079	0.215301	0.0897523	0.120231	0.879283	1.05954	0.630842	0.870623	0.680549
137	275	0.195562	0.151043	0.906048	0.516155	0.720284	0.203903	0.421978	0.400318	0.377657	0.561575	0.574042	0.358522	0.319892	0.471057	0.432242	0.379534	0.410419	0.355362	0.0967662	0.300499	0.445164	0.368174	0.415142	0.486445	0.126698	0.118552	0.135234	0.0979368	0.118193	0.0381273	0.0841613	0.114957	0.133415	0.143891	0.246883	0.144261	0.163536	0.143398	0.222819	0.102073	0.197785	0.0784827	0.087058	0.729848	0.879074	0.471824	0.742851	0.542914
138	279	0.749453	0.816381	0.106775	0.166024	0.178514	0.624091	0.209066	0.250487	0.203464	0.150852	0.196998	0.256313	0.234025	0.233498	0.216398	0.266098	0.238428	0.216402	0.233748	0.373752	0.222812	0.188413	0.186994	0.32533	0.47343	0.569215	0.263562	0.220247	0.279404	0.289755	0.205206	0.329698	0.301306	0.242733	0.736787	0.381512	0.410976	0.276178	0.318671	0.329529	0.418498	0.246824	0.333131	0.183711	0.169756	0.259912	0.136291	0.309042
139	28	0.399079	0.487233	0.0856129	0.166578	0.331313	0.272539	0.390731	0.617965	0.420579	0.405532	0.483186	0.588272	0.363681	0.514928	0.413786	0.7474	0.624586	0.502965	0.697744	0.724768	0.701111	0.506294	0.541533	0.791797	0.615815	0.323403	0.571561	0.726368	0.838971	0.660502	0.749185	1.00531	0.79709	0.480163	0.589052	0.646649	0.792397	0.313752	0.729217	0.857601	0.618347	0.742979	0.867146	0.128058	0.143368	0.50344	0.0957324	0.443764
140	280	0.279884	0.400607	0.0690248	0.0789498	0.193155	0.2784	0.286862	0.326297	0.270926	0.224518	0.283467	0.334866	0.275856	0.332987	0.243862	0.464645	0.417276	0.274446	0.496572	0.451165	0.379084	0.237406	0.308987	0.517811	0.454416	0.169675	0.389331	0.577574	0.550705	0.411722	0.537305	0.643038	0.480092	0.368204	0.372791	0.482553	0.572123	0.23114	0.441075	0.64022	0.463519	0.586518	0.580922	0.0405506	0.068808	0.334205	0.0621739	0.328475
141	281	0.353962	0.416588	0.0523428	0.140562	0.224436	0.283163	0.291892	0.453513	0.356602	0.246931	0.304861	0.459542	0.288101	0.382214	0.275618	0.544815	0.405737	0.36624	0.459758	0.641308	0.475774	0.391458	0.387087	0.54868	0.585303	0.28406	0.446098	0.539205	0.573168	0.534392	0.589008	0.724283	0.592098	0.431729	0.445968	0.533899	0.641031	0.333713	0.576467	0.634628	0.488563	0.508333	0.653365	0.0708515	0.116888	0.434615	0.0457598	0.324009
142	282	0.312971	0.350802	0.553808	0.441077	0.609878	0.214385	0.496126	0.502688	0.513046	0.501079	0.523179	0.590382	0.494766	0.634698	0.509922	0.639878	0.639908	0.454255	0.344816	0.596919	0.615939	0.516733	0.508729	0.698555	0.401307	0.209422	0.32297	0.374643	0.427266	0.33203	0.405073	0.453799	0.434605	0.329343	0.412137	0.42702	0.482614	0.27149	0.449024	0.452969	0.390701	0.345117	0.462915	0.55754	0.633519	0.734228	0.459722	0.561677
143	283	0.304122	0.307843	0.825499	0.421108	0.826178	0.258361	0.618038	0.671962	0.535955	0.649175	0.733058	0.664098	0.507096	0.711344	0.589908	0.726151	0.64934	0.489192	0.326672	0.611732	0.682764	0.535352	0.601638	0.823824	0.320353	0.174989	0.290578	0.336793	0.368895	0.210286	0.323471	0.395094	0.370347	0.312835	0.393299	0.402023	0.438938	0.254713	0.486059	0.431413	0.425746	0.320965	0.399704	0.721422	0.861403	0.70671	0.698359	0.800269
144	284	0.810467	0.907505	0.111762	0.157772	0.297582	0.641753	0.359457	0.41307	0.437714	0.301983	0.458724	0.500125	0.402392	0.502745	0.438472	0.647096	0.519987	0.394694	0.596488	0.597046	0.556217	0.394542	0.425566	0.610166	0.740543	0.582783	0.5669	0.652253	0.660732	0.545202	0.655021	0.74829	0.705599	0.485422	0.852862	0.610325	0.705621	0.369394	0.672017	0.705087	0.653731	0.486484	0.638456	0.143212	0.191098	0.426941	0.149759	0.492858
145	285	0.432854	0.497514	0.07741	0.166339	0.329517	0.24426	0.374141	0.574024	0.407616	0.321891	0.43683	0.584627	0.347028	0.503994	0.401613	0.739559	0.597155	0.396129	0.646373	0.68906	0.66219	0.479786	0.530273	0.716861	0.681998	0.300184	0.626885	0.773846	0.741824	0.630245	0.775903	0.93795	0.78542	0.529486	0.579829	0.701577	0.866599	0.385035	0.71946	0.913534	0.631496	0.651548	0.887007	0.118347	0.139696	0.459379	0.0790957	0.485103
146	286	0.383326	0.446178	0.465199	0.428208	0.681398	0.282012	0.527452	0.641159	0.521003	0.524583	0.573799	0.651953	0.480907	0.623283	0.500869	0.69753	0.73999	0.516396	0.418989	0.688699	0.714104	0.511417	0.575558	0.872433	0.52387	0.245281	0.421499	0.556831	0.523315	0.42657	0.462773	0.64313	0.550491	0.397605	0.496003	0.55263	0.635717	0.274644	0.602185	0.637714	0.488076	0.462679	0.59558	0.470645	0.561235	0.657625	0.392913	0.656357
147	287	0.799174	0.925596	0.173011	0.189083	0.293639	0.685696	0.378523	0.458539	0.352295	0.287928	0.355751	0.435475	0.344381	0.42465	0.383328	0.504578	0.432476	0.34647	0.482439	0.470628	0.540658	0.349924	0.390618	0.580455	0.716441	0.602637	0.47659	0.468209	0.545621	0.407038	0.524714	0.60847	0.609894	0.442475	0.928077	0.610783	0.642697	0.36142	0.633059	0.567016	0.577285	0.440853	0.619553	0.20717	0.234211	0.425469	0.195875	0.444978
148	288	0.203668	0.173111	0.890557	0.497765	0.727781	0.231635	0.450378	0.470739	0.446347	0.662949	0.620143	0.435134	0.390966	0.579978	0.445059	0.46113	0.495999	0.432949	0.115886	0.345405	0.545836	0.48117	0.459519	0.55697	0.154359	0.122224	0.149039	0.118224	0.112531	0.0753085	0.106125	0.125773	0.153999	0.153043	0.272824	0.160431	0.183253	0.150972	0.205903	0.136539	0.206194	0.0928422	0.121958	0.831982	0.996595	0.550107	0.742151	0.575867
149	289	0.327204	0.335105	0.661114	0.473079	0.691117	0.218581	0.493328	0.570024	0.476332	0.557422	0.57871	0.509957	0.443812	0.590119	0.5272	0.686741	0.583126	0.526262	0.340866	0.687379	0.653807	0.570316	0.592229	0.747869	0.3489	0.223495	0.336584	0.431157	0.394585	0.320588	0.358627	0.459172	0.408019	0.340679	0.470917	0.422653	0.474323	0.248523	0.415438	0.426433	0.406174	0.343917	0.415277	0.628705	0.730213	0.718217	0.516711	0.629921
150	29	0.424619	0.361503	0.109889	0.161399	0.234541	0.277145	0.741988	0.358328	0.797389	0.296714	0.311081	0.367372	0.662943	0.928003	0.830384	0.829381	0.377522	0.310907	0.483804	0.710094	0.360118	0.30534	0.299702	0.698458	0.414093	0.249697	1.11548	0.443426	0.484378	0.558857	0.416225	0.570381	0.918069	1.06323	0.460509	0.557377	0.617762	0.284559	0.559813	0.569994	0.472132	0.418357	0.552662	0.13969	0.159809	0.433733	0.102891	0.340936
151	290	0.410746	0.439739	0.604457	0.48536	0.828576	0.29096	0.561941	0.674982	0.586536	0.613013	0.653772	0.738144	0.532554	0.718422	0.625535	0.869618	0.790321	0.598922	0.523118	0.763191	0.908547	0.619095	0.6398	0.956548	0.469192	0.249482	0.482849	0.552277	0.537334	0.440955	0.525337	0.678253	0.636942	0.453574	0.565254	0.633555	0.64205	0.350225	0.638136	0.701136	0.587464	0.539999	0.579224	0.559983	0.69761	0.81136	0.538107	0.786025
152	291	0.376473	0.431325	0.665733	0.482905	0.769654	0.307118	0.681348	0.697323	0.638713	0.666465	0.75185	0.766341	0.591807	0.855152	0.691512	0.814602	0.827391	0.60625	0.449197	0.795763	0.876116	0.630207	0.687485	0.90517	0.454765	0.227956	0.462749	0.52738	0.596899	0.393088	0.569955	0.64471	0.640047	0.451785	0.540503	0.573911	0.656145	0.276588	0.628744	0.66008	0.541696	0.475863	0.664587	0.626156	0.82768	0.879279	0.608514	0.800741
153	292	0.384571	0.36698	0.127916	0.191794	0.25788	0.231264	0.655233	0.276841	0.687403	0.268282	0.25691	0.395576	0.688943	0.780311	0.723266	0.757128	0.307266	0.264677	0.431645	0.623119	0.356445	0.311711	0.349465	0.611497	0.461794	0.225294	1.1058	0.446984	0.445469	0.530128	0.431383	0.54389	0.874544	1.0209	0.450374	0.482402	0.624761	0.292666	0.526736	0.544641	0.460209	0.406766	0.558212	0.166815	0.141078	0.387098	0.0927104	0.298777
154	293	0.616649	0.692447	0.107223	0.18218	0.346109	0.405542	0.686334	0.40959	0.711677	0.336188	0.387859	0.437668	0.620195	0.855386	0.758932	0.83333	0.511028	0.347941	0.595249	0.764285	0.598012	0.409935	0.42548	0.796339	0.614722	0.42657	1.17192	0.648488	0.663087	0.637207	0.632379	0.716062	1.33218	0.976057	0.762041	0.707819	0.891177	0.37389	0.731832	0.804468	0.660236	0.617223	0.759252	0.182741	0.239995	0.459106	0.173589	0.450795
155	294	0.365618	0.451186	0.0582772	0.165181	0.290646	0.265689	0.308956	0.440436	0.319766	0.282009	0.356588	0.498582	0.301871	0.382565	0.302379	0.635894	0.498916	0.367375	0.546507	0.712858	0.524604	0.361525	0.405658	0.581529	0.582057	0.283052	0.481659	0.668125	0.669254	0.59842	0.607967	0.801236	0.670236	0.432624	0.434527	0.59264	0.695979	0.311136	0.581959	0.739356	0.518275	0.559616	0.695268	0.0452209	0.0782044	0.409295	0.0429157	0.347599
156	295	0.441017	0.505948	0.0915894	0.196746	0.346793	0.353315	0.360669	0.509473	0.366109	0.26717	0.399023	0.517232	0.327848	0.495808	0.402928	0.612757	0.517142	0.423368	0.767687	0.667217	0.555101	0.423901	0.472533	0.683455	0.613944	0.305618	0.554413	0.78544	0.750428	0.657591	0.785147	0.88308	0.733113	0.534936	0.619041	0.838358	0.922762	0.429464	0.857966	0.874256	0.747081	0.71908	0.877155	0.110402	0.134388	0.484879	0.0969334	0.462768
157	296	0.469425	0.582902	0.118801	0.15992	0.320602	0.43617	0.49094	0.416783	0.48116	0.322853	0.414767	0.517657	0.403607	0.550543	0.499288	0.602185	0.504206	0.408777	0.629269	0.743134	0.515575	0.367295	0.392071	0.631142	0.547422	0.336604	0.625338	0.630735	0.669253	0.529836	0.666031	0.891772	0.733143	0.588056	0.612711	0.999092	0.985459	0.51005	0.961615	0.878852	0.801988	0.710032	0.777579	0.14188	0.197142	0.62443	0.156925	0.602526
158	297	0.271902	0.327191	0.0357572	0.167398	0.173227	0.253543	0.193412	0.29637	0.24305	0.149476	0.234159	0.361075	0.289596	0.270539	0.22775	0.473762	0.329649	0.297669	0.307424	0.488891	0.322336	0.259249	0.229833	0.422821	0.428702	0.296207	0.319502	0.2849	0.438741	0.457438	0.331405	0.504376	0.403006	0.311965	0.297286	0.411693	0.417519	0.343075	0.392581	0.499873	0.358629	0.419067	0.546566	0.0815979	0.0582222	0.341171	0.0486104	0.274769
159	298	1.15389	1.21094	0.212388	0.209807	0.433942	0.878595	0.482748	0.521339	0.514638	0.397512	0.575869	0.572035	0.448216	0.601751	0.583348	0.707572	0.585309	0.458709	0.643784	0.667356	0.639839	0.477669	0.496801	0.778506	0.908508	0.813115	0.648725	0.599985	0.720597	0.540438	0.636905	0.777819	0.819003	0.546609	1.25832	0.836436	0.800816	0.45847	0.851759	0.718799	0.793228	0.637479	0.760778	0.281411	0.341761	0.583717	0.282673	0.684621
160	299	0.454774	0.451507	0.0728337	0.226797	0.34773	0.357873	0.526617	0.549396	0.535317	0.372988	0.498958	0.584254	0.444256	0.593659	0.523001	0.722305	0.612771	0.45094	0.779808	0.774131	0.681515	0.434403	0.49445	0.72722	0.619274	0.296461	0.721908	0.842348	0.799079	0.57708	0.734916	0.922093	0.868258	0.626531	0.609917	0.862288	0.973318	0.375227	0.862109	1.06775	0.724593	0.796856	1.08199	0.122537	0.150822	0.616156	0.133591	0.5547
161	3	0.590434	0.712732	0.058262	0.218585	0.443388	0.388054	0.50458	0.736981	0.537455	0.403219	0.566957	0.765961	0.513589	0.667256	0.605463	0.971196	0.831112	0.613159	0.967191	1.06302	0.879443	0.599752	0.622696	1.08069	0.855702	0.388729	0.791188	1.06974	1.00355	0.881498	0.99922	1.23429	1.0254	0.696632	0.802398	1.05267	1.24866	0.483974	1.09641	1.22897	0.895181	0.924105	1.22349	0.103173	0.160351	0.673441	0.117392	0.685014
162	30	0.361143	0.350978	0.096348	0.136389	0.223301	0.25626	0.730825	0.342671	0.716566	0.261964	0.313557	0.362771	0.684682	0.853658	0.811588	0.827618	0.341951	0.258112	0.459323	0.666746	0.417327	0.273481	0.30485	0.74595	0.394265	0.227089	1.1686	0.478564	0.484569	0.585287	0.449828	0.524157	0.910799	1.05911	0.448148	0.56904	0.601657	0.222711	0.552414	0.527346	0.502917	0.441223	0.53778	0.115414	0.169542	0.380219	0.111149	0.359043
163	302	0.32433	0.432665	0.0367422	0.152293	0.195492	0.357868	0.265939	0.298924	0.281266	0.199418	0.236287	0.367091	0.249846	0.324296	0.28971	0.510807	0.373968	0.302066	0.438286	0.593916	0.351659	0.276543	0.278818	0.427327	0.471506	0.289331	0.384621	0.51941	0.493129	0.467491	0.457745	0.552179	0.543314	0.371759	0.379577	0.504591	0.599238	0.351625	0.568107	0.676835	0.487926	0.473611	0.594134	0.0661555	0.0614386	0.348635	0.0361303	0.390882
164	303	0.283257	0.240983	0.00234477	0.153005	0.095366	0.212678	0.186441	0.209628	0.235321	0.113348	0.150185	0.29846	0.180237	0.221398	0.206418	0.35756	0.243177	0.222549	0.251694	0.402999	0.203026	0.157514	0.131891	0.299707	0.327597	0.192821	0.270163	0.344612	0.34159	0.467159	0.307916	0.439041	0.337858	0.257177	0.230732	0.382188	0.502011	0.282177	0.397177	0.509812	0.30067	0.318179	0.431225	0.0387692	0.0213276	0.25687	0.0148095	0.213075
165	304	0.752311	0.977112	0.0994603	0.191405	0.270169	0.671981	0.260985	0.340279	0.275447	0.228327	0.291831	0.331745	0.259656	0.295883	0.265627	0.454301	0.327321	0.319396	0.393406	0.43442	0.356548	0.295411	0.303907	0.415166	0.650735	0.59945	0.32519	0.384639	0.467267	0.396163	0.404323	0.523485	0.489701	0.341295	0.768827	0.512194	0.571083	0.370501	0.529425	0.500897	0.4875	0.366723	0.502029	0.152711	0.167362	0.368924	0.140952	0.422726
166	306	0.50089	0.480747	0.0812425	0.185683	0.388045	0.348886	0.442751	0.545348	0.462085	0.345176	0.431727	0.571456	0.451458	0.567614	0.506047	0.788414	0.560359	0.41452	0.849144	0.798278	0.698812	0.467672	0.482625	0.771663	0.615575	0.318551	0.715201	0.752224	0.850181	0.630886	0.695195	0.918597	0.865181	0.613677	0.561743	0.836485	1.07919	0.420225	0.979278	1.13088	0.770793	0.821569	1.07318	0.139317	0.166227	0.633127	0.124753	0.474069
167	307	0.483192	0.496966	0.0756366	0.150032	0.340849	0.339286	0.421399	0.478778	0.457011	0.289245	0.408401	0.614669	0.411213	0.537475	0.509802	0.753035	0.55352	0.457114	0.806305	0.77721	0.618387	0.460398	0.527696	0.794818	0.620767	0.285732	0.683245	0.78365	0.839891	0.617614	0.761087	1.01709	0.90515	0.600599	0.590966	0.824487	0.923958	0.328813	0.820966	1.03531	0.738231	0.912099	0.992007	0.0688826	0.132464	0.57944	0.0521859	0.540166
168	309	0.19048	0.217077	0.303075	0.35309	0.373414	0.17771	0.248271	0.294882	0.263621	0.252918	0.257426	0.31599	0.277883	0.296717	0.261905	0.374637	0.317364	0.342175	0.228226	0.395291	0.343619	0.284582	0.265683	0.377403	0.254151	0.168935	0.193211	0.183446	0.226866	0.269956	0.237599	0.271156	0.227452	0.164763	0.240983	0.229373	0.248687	0.254154	0.251878	0.211022	0.219483	0.164062	0.227399	0.372023	0.386521	0.366242	0.259585	0.360279
169	31	0.365459	0.374172	0.120108	0.128031	0.267517	0.258899	0.699903	0.326326	0.805327	0.268528	0.307674	0.334733	0.666955	0.918464	0.869148	0.769154	0.369272	0.2636	0.423841	0.73934	0.380018	0.285435	0.297797	0.673293	0.44024	0.232793	1.16939	0.464723	0.530096	0.535879	0.463975	0.594667	0.904363	1.12903	0.397113	0.573065	0.603849	0.254	0.549392	0.62531	0.465024	0.466822	0.57332	0.140874	0.158962	0.360507	0.120978	0.334936
170	311	0.608503	0.700236	0.0789633	0.259059	0.461201	0.37566	0.611709	0.715441	0.596887	0.441844	0.574444	0.789898	0.569741	0.750438	0.643423	1.0433	0.821123	0.596341	0.99318	1.06019	0.902397	0.648555	0.696934	1.02622	0.787358	0.354951	0.862177	1.03861	1.02546	0.839594	1.00869	1.15625	1.09926	0.749201	0.812316	0.998312	1.23649	0.426377	1.10708	1.34915	0.971013	1.03017	1.32488	0.0993103	0.170251	0.736008	0.100988	0.668627
171	313	0.487657	0.446292	0.0732053	0.246304	0.342143	0.339767	0.419549	0.511268	0.436214	0.367516	0.423531	0.580146	0.416622	0.597008	0.437994	0.764046	0.570817	0.416667	0.765115	0.715183	0.611713	0.398798	0.522498	0.738897	0.632836	0.32329	0.604692	0.752281	0.808544	0.589063	0.687964	0.820641	0.785599	0.601229	0.593062	0.738846	0.888707	0.340124	0.840997	0.992655	0.755309	0.758817	1.00235	0.12766	0.141557	0.610896	0.104413	0.523612
172	314	0.460482	0.446294	0.0680111	0.222844	0.35224	0.279797	0.407759	0.507984	0.45809	0.333782	0.426522	0.569652	0.479434	0.538392	0.494657	0.674681	0.569468	0.42996	0.666608	0.684101	0.600435	0.428095	0.458381	0.670006	0.561576	0.274256	0.641052	0.77543	0.77258	0.53368	0.773203	0.860031	0.762849	0.578933	0.548849	0.692392	0.876386	0.377615	0.715629	0.913782	0.654239	0.723309	0.925406	0.0887376	0.13008	0.520568	0.100363	0.450405
173	316	0.321575	0.3696	0.554043	0.387829	0.622317	0.259948	0.480476	0.573381	0.451675	0.599876	0.561542	0.552799	0.44583	0.585089	0.545229	0.731039	0.641466	0.505898	0.471458	0.669812	0.716635	0.547368	0.618962	0.792317	0.369278	0.225918	0.352674	0.45135	0.393442	0.338374	0.442749	0.553683	0.549723	0.392201	0.474249	0.515861	0.533431	0.261514	0.531549	0.535256	0.46455	0.48426	0.514993	0.508052	0.629611	0.656801	0.471864	0.598687
174	317	0.30435	0.33269	0.636366	0.408774	0.732322	0.240285	0.549835	0.592386	0.597517	0.61782	0.738972	0.662358	0.552348	0.737325	0.61658	0.764753	0.708137	0.556985	0.404215	0.613345	0.776587	0.53937	0.58937	0.836394	0.480945	0.165298	0.388725	0.437457	0.492756	0.284457	0.457827	0.533904	0.483274	0.339861	0.459168	0.526071	0.58327	0.24685	0.564074	0.564068	0.492625	0.40677	0.535372	0.555311	0.677376	0.699309	0.519977	0.718774
175	318	0.308006	0.254756	0.325547	0.292135	0.407192	0.186776	0.463964	0.330943	0.51067	0.343961	0.288944	0.37701	0.484196	0.531416	0.590505	0.577258	0.369656	0.307435	0.289601	0.540742	0.398817	0.319568	0.353066	0.557776	0.288538	0.242789	0.517979	0.285782	0.317336	0.417332	0.290414	0.349959	0.529362	0.528883	0.324972	0.36583	0.408833	0.236264	0.419125	0.410258	0.324378	0.303129	0.38299	0.286671	0.349584	0.396717	0.228575	0.40586
176	319	0.460071	0.499495	0.0810316	0.183673	0.304406	0.304997	0.318253	0.397658	0.386927	0.301151	0.351868	0.47081	0.355432	0.435167	0.368737	0.63241	0.460977	0.344442	0.57343	0.694366	0.525136	0.36075	0.397133	0.568447	0.556119	0.315293	0.482586	0.539549	0.708434	0.529644	0.595822	0.766629	0.668209	0.487476	0.483564	0.750925	0.738489	0.444209	0.75635	0.805596	0.713073	0.642351	0.8249	0.116983	0.13358	0.446162	0.0910338	0.400497
177	32	0.315104	0.298934	0.106355	0.113607	0.218852	0.234644	0.628353	0.312003	0.660554	0.242593	0.281158	0.322802	0.578091	0.731809	0.715071	0.693365	0.294436	0.220854	0.370508	0.570362	0.335604	0.25879	0.260632	0.620974	0.337121	0.18072	1.02322	0.411321	0.387801	0.553405	0.376767	0.465039	0.766447	0.946054	0.341364	0.464629	0.502458	0.19903	0.471078	0.434811	0.39552	0.346098	0.452177	0.102282	0.121145	0.318068	0.0986661	0.275195
178	320	0.378809	0.405717	0.284521	0.259902	0.480761	0.280251	0.432712	0.559326	0.426598	0.475421	0.481645	0.557515	0.409551	0.566652	0.419982	0.732176	0.661014	0.381674	0.615829	0.676614	0.679153	0.496005	0.542666	0.749264	0.512274	0.226233	0.537615	0.656881	0.644373	0.516015	0.698132	0.767677	0.68205	0.448073	0.549075	0.615556	0.69648	0.320679	0.695059	0.751364	0.589122	0.549161	0.703493	0.312319	0.406634	0.619474	0.29211	0.573372
179	321	0.513058	0.55536	0.0826967	0.199067	0.382476	0.353609	0.485197	0.563987	0.472419	0.372105	0.468287	0.627246	0.485816	0.575014	0.523927	0.712506	0.573771	0.422065	0.711847	0.725445	0.670278	0.400591	0.480689	0.748194	0.664598	0.349549	0.66999	0.776827	0.782865	0.566969	0.70918	0.904988	0.857276	0.612143	0.579259	0.820625	1.05223	0.443768	0.936854	1.08476	0.751987	0.767818	0.995522	0.1096	0.151298	0.509274	0.114652	0.553434
180	323	0.23787	0.299183	0.0456617	0.134806	0.159375	0.222845	0.213342	0.223517	0.194253	0.082749	0.173058	0.220566	0.253103	0.232427	0.195717	0.355581	0.248058	0.225246	0.294738	0.401558	0.236315	0.166765	0.152552	0.297205	0.308768	0.24539	0.324142	0.280318	0.373438	0.371103	0.268405	0.424804	0.404902	0.345536	0.233339	0.486998	0.449045	0.308922	0.476361	0.439027	0.366666	0.395061	0.502629	0.0782995	0.0415271	0.205446	0.0377751	0.241908
181	324	0.151426	0.0896766	0.685899	0.383891	0.528683	0.156685	0.270209	0.244576	0.27041	0.431852	0.356149	0.2619	0.20627	0.352133	0.289249	0.247272	0.262218	0.241307	0.0568731	0.224528	0.260759	0.280656	0.229486	0.291262	0.109045	0.107916	0.0816971	0.0573598	0.0688187	0.0251281	0.0577798	0.0499006	0.0787858	0.0840139	0.15932	0.0749517	0.089157	0.124195	0.144488	0.0290111	0.109512	0.0422358	0.0637249	0.635316	0.72056	0.385297	0.538063	0.429718
182	326	0.300636	0.359137	0.0249236	0.14793	0.19947	0.260111	0.21908	0.239472	0.228975	0.17379	0.243444	0.303559	0.230132	0.307079	0.230626	0.440374	0.268326	0.24311	0.389601	0.514866	0.296574	0.174069	0.22453	0.395736	0.396985	0.307417	0.341197	0.390634	0.4512	0.48048	0.364052	0.564703	0.421415	0.360768	0.331033	0.540659	0.613302	0.309634	0.53846	0.61361	0.463883	0.458437	0.613834	0.0540448	0.0624177	0.277506	0.017813	0.324055
183	327	0.422827	0.458454	0.0814345	0.166509	0.278029	0.325417	0.426489	0.510346	0.413635	0.336973	0.42799	0.569851	0.378211	0.531768	0.434542	0.634748	0.58985	0.447794	0.740226	0.687816	0.610881	0.377809	0.468979	0.691974	0.615136	0.240278	0.652958	0.719634	0.811883	0.565187	0.763445	0.904583	0.744993	0.581141	0.54657	0.783555	0.912051	0.327406	0.808814	0.962736	0.683961	0.794342	0.929362	0.137429	0.133916	0.575338	0.0894981	0.51311
184	328	0.388011	0.451234	0.563219	0.398621	0.689003	0.364621	0.536245	0.680524	0.528149	0.503012	0.608107	0.674946	0.445439	0.717294	0.532046	0.807399	0.723194	0.582717	0.546309	0.710533	0.719064	0.483003	0.583154	0.836435	0.473572	0.237202	0.451433	0.630774	0.562447	0.447819	0.539826	0.652141	0.61319	0.431588	0.525662	0.633589	0.674851	0.27754	0.644638	0.690901	0.581105	0.495534	0.664496	0.533145	0.641454	0.72032	0.500597	0.702623
185	329	0.36222	0.418378	0.368666	0.288736	0.552156	0.271355	0.47597	0.63106	0.511265	0.466818	0.563398	0.663196	0.421996	0.672423	0.495261	0.749031	0.658744	0.540466	0.624164	0.704694	0.715876	0.518122	0.553853	0.789395	0.529352	0.268417	0.537541	0.742353	0.696239	0.468307	0.710326	0.766355	0.743348	0.477168	0.53948	0.666621	0.807491	0.322824	0.735226	0.817579	0.618519	0.609009	0.802484	0.360703	0.457903	0.62093	0.347435	0.614546
186	33	0.406166	0.425284	0.128679	0.158834	0.284669	0.274079	0.784002	0.381405	0.798418	0.265175	0.323756	0.373717	0.727519	0.941796	0.875671	0.858323	0.356616	0.321975	0.54908	0.781771	0.444442	0.294163	0.347933	0.776629	0.442143	0.253715	1.32645	0.513827	0.591661	0.566173	0.522684	0.613864	1.09724	1.17596	0.470423	0.622892	0.678771	0.259934	0.641536	0.632076	0.56832	0.473112	0.649145	0.154564	0.17526	0.427146	0.111634	0.408387
187	330	0.399536	0.383915	0.100105	0.152371	0.296366	0.2635	0.870882	0.364431	0.85133	0.287262	0.337218	0.40208	0.676739	1.0086	0.954975	0.904477	0.403442	0.312623	0.524015	0.817383	0.494476	0.308438	0.341753	0.831853	0.436953	0.19826	1.26609	0.523955	0.545365	0.621587	0.503622	0.661735	1.02037	1.23476	0.473878	0.654062	0.701515	0.244874	0.662969	0.677984	0.542026	0.520919	0.685195	0.126487	0.163601	0.449242	0.114862	0.387517
188	331	0.499514	0.601051	0.103037	0.211952	0.285874	0.353186	0.464616	0.54112	0.465382	0.280327	0.44307	0.638689	0.415907	0.548322	0.42176	0.77718	0.608724	0.426147	0.685544	0.758992	0.623789	0.471772	0.470895	0.754797	0.665581	0.342832	0.560285	0.731186	0.833639	0.718292	0.755725	0.826401	0.755566	0.551467	0.586421	0.814666	0.93251	0.487727	0.825328	0.928859	0.708751	0.681486	0.864753	0.112935	0.101585	0.450852	0.0641672	0.497476
189	333	0.510513	0.551864	0.0535504	0.161305	0.325371	0.34791	0.584052	0.539405	0.579006	0.276516	0.461875	0.590752	0.575403	0.779582	0.680612	0.891334	0.61544	0.384188	0.790449	0.784717	0.612554	0.445701	0.57266	0.816144	0.737934	0.345585	0.888647	0.820026	0.860891	0.691109	0.79239	0.861397	0.929344	0.80955	0.612991	0.794281	0.905587	0.417475	0.838039	0.991223	0.727942	0.752473	0.952287	0.0925373	0.101037	0.489383	0.0757344	0.550992
190	335	0.27258	0.210847	1.36776	0.751412	1.18542	0.208284	0.593559	0.564121	0.60938	0.800136	0.761144	0.502349	0.521565	0.702297	0.589692	0.602657	0.59939	0.512227	0.144158	0.499332	0.710269	0.550696	0.607525	0.750995	0.19141	0.174068	0.240866	0.131815	0.173826	0.106632	0.141814	0.148738	0.22894	0.192328	0.336389	0.227213	0.206	0.168931	0.2531	0.138922	0.257181	0.126221	0.187213	1.21199	1.48646	0.865201	1.14943	0.927061
191	336	0.273328	0.221079	1.32878	0.760799	1.13768	0.218422	0.559743	0.555983	0.594913	0.764802	0.711099	0.489725	0.45148	0.688107	0.606842	0.582627	0.586763	0.523961	0.167236	0.421179	0.698271	0.483723	0.621762	0.704892	0.205384	0.190059	0.211407	0.124476	0.228005	0.0908523	0.134918	0.15018	0.198371	0.221749	0.339545	0.269785	0.18573	0.154424	0.259485	0.121561	0.262568	0.134905	0.178274	1.1007	1.37379	0.817981	1.12442	0.866854
192	337	0.223159	0.130214	1.03868	0.53963	0.861036	0.161157	0.400904	0.392575	0.398651	0.552463	0.548524	0.379604	0.360389	0.51587	0.40802	0.443571	0.423234	0.371551	0.110594	0.303645	0.50044	0.35882	0.446476	0.453488	0.165147	0.141125	0.16112	0.103805	0.152323	0.0860904	0.115405	0.12322	0.174686	0.174916	0.253951	0.18029	0.176116	0.131485	0.181184	0.0946575	0.216883	0.111396	0.113371	0.925639	1.15911	0.644411	0.904265	0.66777
193	338	0.20465	0.166433	1.08405	0.538984	0.875335	0.162109	0.44469	0.437444	0.450429	0.587765	0.604393	0.39697	0.351668	0.556292	0.480957	0.434021	0.483375	0.423336	0.102849	0.281709	0.524003	0.412622	0.435588	0.489862	0.133597	0.144028	0.163957	0.0982568	0.119746	0.0717206	0.104365	0.111927	0.159948	0.151596	0.27134	0.177364	0.147518	0.120115	0.214125	0.119917	0.178476	0.0914596	0.114054	0.870107	1.07993	0.637582	0.935126	0.725191
194	339	0.189988	0.133973	1.0287	0.556235	0.887048	0.158641	0.391719	0.370603	0.393105	0.556747	0.536626	0.35213	0.342764	0.502082	0.431177	0.354208	0.399715	0.310518	0.10457	0.255396	0.456686	0.350674	0.409969	0.441722	0.147507	0.116704	0.167564	0.106065	0.104009	0.0756255	0.0927459	0.106039	0.138046	0.138368	0.257228	0.184526	0.174822	0.100619	0.202168	0.0754938	0.177417	0.0868302	0.105204	0.82162	1.05448	0.563119	0.820269	0.611911
195	34	0.433746	0.386753	0.156901	0.162684	0.32044	0.324916	0.800861	0.384806	0.784943	0.264037	0.361369	0.382424	0.731482	1.00654	0.882786	0.860768	0.429435	0.362318	0.502606	0.759912	0.473339	0.326108	0.425553	0.761082	0.460652	0.254096	1.36479	0.508306	0.546374	0.630298	0.547672	0.624002	1.02814	1.25983	0.513859	0.625392	0.683436	0.304665	0.673183	0.649466	0.58189	0.521536	0.668559	0.155412	0.175749	0.45794	0.140514	0.420322
196	340	0.048565	0.0377555	0.217913	0.185994	0.141828	0.0819482	0.118845	0.0798949	0.141509	0.227134	0.207831	0.153048	0.141935	0.164922	0.143381	0.117755	0.136612	0.152746	-0.0264154	0.0786112	0.104347	0.167263	0.165878	0.192066	-0.00495046	0.0671677	-0.0127493	-0.0368633	-0.0125369	-0.0379884	-0.0229336	-0.0132801	-0.0271291	0.0239892	0.0242147	-0.00874237	-0.0103354	0.0457571	0.00859891	-0.0442412	0.00665441	0.019054	-0.0119507	0.239866	0.25428	0.115146	0.227431	0.171863
197	341	0.195117	0.135206	0.592049	0.27341	0.499041	0.196196	0.427749	0.476687	0.400641	0.543435	0.526418	0.416072	0.371209	0.525517	0.488639	0.459732	0.454545	0.368619	0.129191	0.227435	0.498632	0.37408	0.436533	0.490204	0.154336	0.123024	0.167438	0.088417	0.154598	0.0594737	0.137993	0.106152	0.142767	0.138811	0.255273	0.201647	0.176054	0.136408	0.224882	0.0928602	0.195587	0.106595	0.14685	0.608459	0.788316	0.437975	0.656999	0.44167
198	342	0.217953	0.181854	0.672117	0.340948	0.565762	0.177244	0.541358	0.554117	0.566057	0.721612	0.710972	0.545881	0.496224	0.665029	0.630607	0.594415	0.598485	0.492567	0.15154	0.400017	0.63557	0.446168	0.579195	0.671391	0.155061	0.157839	0.201044	0.0873878	0.189074	0.0577424	0.100564	0.132224	0.165435	0.172447	0.312472	0.225594	0.189399	0.157868	0.229769	0.114506	0.198727	0.098201	0.143823	0.694651	0.889245	0.512788	0.750318	0.515844
199	343	0.175496	0.109201	0.491416	0.331377	0.413837	0.159156	0.3779	0.395229	0.422044	0.512362	0.47254	0.398642	0.382877	0.422947	0.402316	0.383764	0.385645	0.403414	0.0383238	0.396909	0.449408	0.365809	0.37005	0.478699	0.123117	0.182644	0.116274	0.022168	0.0787397	0.0825897	0.0131604	0.0666873	0.10399	0.116507	0.170336	0.124477	0.0798477	0.126801	0.166982	0.0360416	0.129957	0.0486202	0.0651854	0.562954	0.691487	0.337907	0.518723	0.426137
200	344	0.207697	0.174968	0.653278	0.348332	0.555217	0.222057	0.526485	0.530676	0.502211	0.670596	0.655912	0.485406	0.436986	0.612405	0.579999	0.531753	0.516957	0.438307	0.163873	0.364297	0.601886	0.431355	0.510177	0.640344	0.194038	0.166871	0.189635	0.128723	0.157276	0.0949864	0.144241	0.154962	0.184318	0.172866	0.276101	0.228197	0.213651	0.150985	0.261039	0.149074	0.249449	0.139847	0.184483	0.710982	0.869233	0.481593	0.728277	0.502811
201	345	0.258798	0.211207	0.711859	0.380699	0.578154	0.215325	0.540274	0.591518	0.525346	0.77041	0.719884	0.579115	0.503706	0.701888	0.593188	0.621446	0.590604	0.530698	0.165238	0.421276	0.655737	0.464315	0.570954	0.708679	0.183664	0.168777	0.152046	0.13361	0.179576	0.0781164	0.127282	0.168571	0.184977	0.165391	0.289017	0.229267	0.209826	0.148169	0.250128	0.139801	0.221309	0.126218	0.164124	0.680914	0.906394	0.48448	0.717172	0.571068
202	346	0.251219	0.196314	0.713123	0.368001	0.576997	0.22438	0.579378	0.574433	0.55732	0.713577	0.725126	0.546341	0.457981	0.677766	0.611254	0.618986	0.581515	0.51022	0.17275	0.447028	0.732083	0.523079	0.650394	0.727332	0.179839	0.169148	0.214986	0.128439	0.199747	0.108579	0.136238	0.169569	0.224663	0.202606	0.314116	0.249902	0.256166	0.139367	0.292125	0.153042	0.254154	0.139447	0.194738	0.701056	0.854374	0.534892	0.744164	0.552757
203	347	0.254718	0.225068	0.713742	0.374514	0.598648	0.228971	0.605112	0.599895	0.556791	0.773774	0.718268	0.595252	0.471836	0.679913	0.622724	0.639527	0.607361	0.490165	0.157962	0.40694	0.627929	0.520757	0.545127	0.696789	0.17684	0.209007	0.215041	0.122703	0.197476	0.0986905	0.141887	0.159917	0.164973	0.185883	0.349508	0.233073	0.204353	0.153383	0.26724	0.149893	0.246998	0.130272	0.177501	0.735298	0.901422	0.559755	0.770831	0.555142
204	348	0.156208	0.116419	0.94456	0.490716	0.740809	0.132721	0.331421	0.353195	0.333746	0.499593	0.488907	0.310706	0.288098	0.430907	0.364002	0.290102	0.358069	0.346706	0.0914869	0.25485	0.449121	0.341758	0.374068	0.415706	0.117549	0.119139	0.138512	0.0885338	0.136353	0.052315	0.0755788	0.0935188	0.127771	0.123576	0.201667	0.153445	0.11703	0.0862989	0.176956	0.0575657	0.129167	0.0582078	0.0698135	0.878858	1.01476	0.57685	0.85948	0.546829
205	349	0.193251	0.161877	0.869292	0.459089	0.758736	0.168154	0.34348	0.377046	0.35702	0.534631	0.457769	0.325373	0.326814	0.427419	0.366441	0.388211	0.345254	0.322317	0.0846195	0.226357	0.436538	0.326176	0.383935	0.409178	0.130807	0.103774	0.11712	0.111106	0.111445	0.0704633	0.0873127	0.118876	0.154938	0.135667	0.218351	0.146704	0.128085	0.0958474	0.156144	0.0646681	0.126684	0.0849791	0.104476	0.866211	1.03118	0.629749	0.837643	0.599501
206	35	0.429682	0.410827	0.145407	0.190745	0.255171	0.27071	0.734194	0.342043	0.78203	0.276577	0.335539	0.362667	0.692882	0.888914	0.827932	0.822256	0.379007	0.328078	0.502309	0.788705	0.453887	0.304004	0.330744	0.783295	0.459236	0.288619	1.19686	0.516848	0.573705	0.64392	0.507095	0.593153	0.939429	1.25592	0.487038	0.581196	0.668575	0.330387	0.628711	0.601249	0.543375	0.450779	0.565136	0.145646	0.190788	0.418352	0.103579	0.366931
207	350	0.39407	0.456384	0.124581	0.145222	0.268185	0.303251	0.788793	0.38316	0.843683	0.297995	0.405929	0.429932	0.686883	1.01203	0.872757	0.808087	0.383875	0.343791	0.551657	0.713786	0.456857	0.308822	0.379084	0.71685	0.462408	0.26542	1.31373	0.589793	0.57433	0.595927	0.538602	0.601884	1.06583	1.18049	0.528293	0.64743	0.662977	0.294593	0.662422	0.720702	0.595441	0.489538	0.619511	0.141111	0.197695	0.37602	0.108342	0.410332
208	353	0.383379	0.464754	0.125555	0.11665	0.338449	0.303183	0.411027	0.520189	0.411309	0.267043	0.325986	0.478423	0.360695	0.517804	0.459194	0.562822	0.385417	0.38908	0.637414	0.615736	0.483367	0.352628	0.475583	0.559786	0.571688	0.248177	0.664474	0.7339	0.701804	0.563666	0.724311	0.849967	0.792095	0.564019	0.515596	0.719989	0.861954	0.412504	0.820203	0.795559	0.654632	0.638613	0.757372	0.129174	0.181633	0.509189	0.1333	0.490299
209	354	0.451052	0.415123	0.103736	0.160316	0.313259	0.344181	0.792389	0.375773	0.884947	0.269705	0.324734	0.411033	0.759768	0.991904	0.904354	0.831036	0.431126	0.360017	0.550553	0.78086	0.485644	0.305885	0.3861	0.779963	0.470748	0.266414	1.34168	0.56757	0.551704	0.61184	0.558296	0.673512	1.10538	1.26927	0.531988	0.6465	0.659415	0.320698	0.690701	0.672748	0.539426	0.504452	0.668009	0.168283	0.179776	0.479133	0.128134	0.412898
210	355	0.382956	0.503455	0.112684	0.168098	0.362017	0.336579	0.423413	0.481601	0.465779	0.321437	0.375613	0.474747	0.398555	0.547328	0.472974	0.637118	0.463479	0.438743	0.666057	0.633399	0.51417	0.391849	0.427505	0.65712	0.624941	0.281226	0.696636	0.753491	0.750998	0.507416	0.692352	0.840156	0.783818	0.581408	0.561819	0.741088	0.95805	0.428271	0.893791	0.870022	0.7215	0.644807	0.848413	0.123865	0.194083	0.45993	0.133438	0.560452
211	356	0.395891	0.331097	0.741374	0.555782	0.803387	0.269573	0.873957	0.550762	0.925316	0.554069	0.577852	0.536878	0.749144	1.08979	0.921971	0.901689	0.596118	0.505487	0.381874	0.785391	0.692057	0.467392	0.575035	0.990164	0.374224	0.242875	0.98647	0.352603	0.448745	0.443662	0.380399	0.483798	0.756963	0.834487	0.499599	0.532539	0.583075	0.238354	0.595637	0.51721	0.476833	0.355331	0.495034	0.721065	0.916307	0.829564	0.655442	0.851639
212	357	0.388792	0.441948	0.412923	0.325043	0.614668	0.29312	1.33799	1.47983	1.26272	1.32214	1.46086	1.45569	1.08767	1.56758	1.34433	1.57609	1.6004	1.25937	0.481564	1.34776	1.87119	1.20021	1.48666	1.91379	0.472584	0.296356	0.470393	0.576137	0.648979	0.492869	0.52724	0.753073	0.682584	0.448898	0.49198	0.584831	0.666894	0.242996	0.638406	0.716095	0.479722	0.515842	0.638429	0.463361	0.679093	0.70167	0.54587	0.817238
213	358	0.202046	0.160214	0.829515	0.445055	0.680468	0.157935	0.451038	0.392831	0.407059	0.600647	0.568798	0.417119	0.360234	0.527845	0.441173	0.452543	0.474858	0.326928	0.108197	0.265459	0.481772	0.343612	0.402023	0.46841	0.132064	0.118878	0.154497	0.082425	0.113716	0.0850963	0.0726878	0.0849128	0.130097	0.146708	0.235688	0.15678	0.14075	0.117992	0.201137	0.0864216	0.179791	0.109799	0.139867	0.901003	1.04504	0.625205	0.87961	0.687242
214	36	0.396632	0.400039	0.13796	0.163419	0.300795	0.266077	0.791758	0.394087	0.861208	0.290359	0.347822	0.368615	0.731491	0.939136	0.839428	0.851446	0.366599	0.292843	0.576234	0.723061	0.484664	0.284861	0.340997	0.794666	0.456184	0.219457	1.42995	0.535162	0.557209	0.61886	0.518439	0.607185	1.21947	1.29535	0.460732	0.571683	0.735568	0.313717	0.637569	0.651895	0.536845	0.536169	0.614127	0.14539	0.163726	0.413198	0.118395	0.36049
215	361	0.373768	0.486146	0.0562465	0.152548	0.29638	0.272047	0.357663	0.577322	0.405901	0.342554	0.376767	0.488023	0.361443	0.477362	0.432129	0.75648	0.548439	0.410702	0.713858	0.706981	0.622066	0.453049	0.499312	0.686062	0.626852	0.291502	0.601735	0.865986	0.770778	0.654898	0.823989	1.01763	0.830394	0.583366	0.635319	0.787502	0.907553	0.403395	0.813943	0.961102	0.698415	0.767725	0.967981	0.0816025	0.12175	0.47969	0.0873204	0.518791
216	362	0.521183	0.514844	0.637587	0.481917	0.724156	0.319818	0.625691	0.706343	0.600332	0.636263	0.751538	0.699954	0.584688	0.775132	0.64179	0.892059	0.765837	0.66467	0.494262	0.678009	0.815162	0.557986	0.675282	0.936455	0.556771	0.302214	0.482563	0.683557	0.618204	0.480662	0.594989	0.754673	0.754579	0.470002	0.59009	0.816739	0.888784	0.376297	0.864818	0.626865	0.780565	0.518459	0.622893	0.82402	1.01987	0.993715	0.78342	1.1616
217	363	0.265649	0.202467	0.940669	0.551186	0.78924	0.215607	0.471007	0.506474	0.511849	0.687588	0.654479	0.462773	0.450053	0.64138	0.523109	0.526719	0.463241	0.463153	0.137795	0.335558	0.605461	0.430758	0.527535	0.582549	0.168379	0.17022	0.20299	0.143752	0.179717	0.0998844	0.149382	0.162446	0.191538	0.179956	0.303674	0.201674	0.223278	0.127301	0.281624	0.141119	0.232517	0.122218	0.163386	1.17287	1.46888	0.872853	1.19402	0.964598
218	364	0.428941	0.507101	0.100121	0.168256	0.393599	0.332803	0.424366	0.467317	0.422502	0.319037	0.446492	0.514797	0.443841	0.519798	0.455457	0.709138	0.516474	0.469273	0.696127	0.698457	0.608417	0.407421	0.507703	0.714229	0.635484	0.306356	0.655912	0.825216	0.794806	0.722549	0.896905	0.89411	0.874864	0.590238	0.581705	0.742293	0.910639	0.382099	0.868654	0.94568	0.70385	0.698768	0.875132	0.118761	0.149069	0.508852	0.0880266	0.460975
219	365	0.289584	0.367361	0.311489	0.290102	0.432373	0.284393	1.21805	1.29536	1.10842	1.13044	1.37029	1.31474	1.0322	1.27288	1.15822	1.54215	1.42019	1.25756	0.386519	1.23328	1.79047	1.25539	1.3529	1.85907	0.377869	0.233767	0.361864	0.463726	0.466302	0.378239	0.426647	0.575775	0.487694	0.291415	0.422321	0.392885	0.467186	0.187006	0.407703	0.478845	0.355199	0.374302	0.462149	0.410161	0.503285	0.536267	0.397613	0.551096
220	366	0.236709	0.193905	0.953073	0.518467	0.778781	0.193448	0.43297	0.467553	0.467613	0.672111	0.658791	0.476463	0.40662	0.588698	0.511477	0.503336	0.495858	0.450781	0.146282	0.329116	0.568631	0.440871	0.473363	0.534531	0.166818	0.153729	0.177267	0.110095	0.191711	0.0782619	0.133739	0.133055	0.151515	0.180745	0.300011	0.224702	0.183482	0.131088	0.256591	0.11811	0.1978	0.120538	0.122603	1.17343	1.49177	0.898388	1.12754	0.945645
221	367	0.231947	0.199765	0.441514	0.374702	0.450239	0.221798	0.365627	0.351354	0.324914	0.405003	0.412661	0.355562	0.280324	0.386983	0.303908	0.36973	0.369205	0.301807	0.151659	0.369315	0.355801	0.30541	0.334442	0.43388	0.184862	0.163997	0.167212	0.14624	0.179373	0.196964	0.156894	0.255066	0.213154	0.130678	0.30199	0.185668	0.230029	0.17199	0.192335	0.162656	0.234783	0.144119	0.14516	0.601216	0.737527	0.546441	0.648004	0.633218
222	368	0.143615	0.14159	0.651875	0.43131	0.536559	0.164284	0.299372	0.333745	0.296359	0.47321	0.4154	0.320966	0.258259	0.381114	0.333062	0.331053	0.370076	0.34256	0.0686065	0.309213	0.348925	0.267492	0.296077	0.351473	0.0798083	0.120805	0.141292	0.065079	0.0876885	0.0786624	0.0734181	0.0760461	0.0888515	0.115055	0.170242	0.128382	0.0911448	0.100652	0.189041	0.0606398	0.150831	0.0571852	0.0670837	0.839398	0.967019	0.603747	0.748485	0.623935
223	369	0.176342	0.136475	0.687916	0.524612	0.526613	0.155267	0.334859	0.357797	0.321383	0.448545	0.411206	0.345436	0.273657	0.430212	0.369854	0.347076	0.366217	0.371791	0.0849046	0.288291	0.431754	0.281021	0.306047	0.385921	0.088708	0.131044	0.125501	0.0842276	0.109875	0.0920497	0.10682	0.118193	0.111307	0.114057	0.17256	0.139265	0.134662	0.109964	0.172205	0.0952943	0.158603	0.080348	0.0921828	0.825057	1.02204	0.617457	0.727195	0.650503
224	37	0.201352	0.16869	0.93517	0.680727	0.757282	0.179573	0.412348	0.450014	0.446372	0.610457	0.543709	0.391866	0.397643	0.503293	0.407142	0.473091	0.444018	0.387941	0.0649143	0.46897	0.500092	0.384369	0.367842	0.518255	0.136897	0.165532	0.14038	0.091148	0.094886	0.0963339	0.0700296	0.103524	0.116821	0.151499	0.230036	0.138642	0.118474	0.144587	0.173542	0.072064	0.176366	0.0648404	0.0881701	0.911296	1.13143	0.696381	0.826676	0.680611
225	370	0.461064	0.576244	0.0828567	0.135699	0.331545	0.327083	0.390546	0.505634	0.425598	0.358699	0.39496	0.559807	0.436043	0.551525	0.41717	0.704261	0.556661	0.453039	0.694927	0.684209	0.577382	0.454806	0.453728	0.709935	0.627784	0.359536	0.647568	0.771565	0.759097	0.660887	0.797323	0.867102	0.867583	0.639133	0.605472	0.745275	0.911064	0.457418	0.740181	0.948275	0.738217	0.694041	0.897868	0.0989716	0.1357	0.530059	0.0979178	0.495924
226	372	0.836714	0.915364	0.2138	0.29126	0.512046	0.606133	0.631181	0.591661	0.648734	0.427895	0.571315	0.63973	0.575458	0.736417	0.640146	0.889911	0.659643	0.493366	0.886005	0.861921	0.664521	0.457606	0.575734	0.888592	0.685512	0.598968	0.750128	0.659334	1.01464	0.679229	0.682326	0.837085	0.859547	0.673976	0.947583	1.29097	1.18052	0.711334	1.3829	0.908081	1.14984	0.842267	0.890896	0.254552	0.310025	0.715808	0.240274	0.886562
227	374	0.419112	0.497794	0.097553	0.179777	0.330895	0.300891	0.390765	0.492072	0.375746	0.26292	0.408611	0.451812	0.34529	0.462721	0.418868	0.631738	0.49029	0.392692	0.709175	0.586781	0.538432	0.42997	0.444057	0.600926	0.554956	0.293028	0.553606	0.716317	0.717189	0.486787	0.623428	0.747568	0.674665	0.453362	0.567948	0.756836	0.868105	0.357702	0.78047	0.786548	0.656738	0.650917	0.795832	0.102162	0.110103	0.482205	0.101792	0.455841
228	375	0.390159	0.479836	0.0664763	0.170293	0.330916	0.296332	0.401581	0.47637	0.381296	0.285313	0.4319	0.503417	0.32863	0.420143	0.385509	0.649463	0.552584	0.407475	0.647493	0.60712	0.604672	0.485365	0.588989	0.680385	0.559348	0.25873	0.494034	0.717221	0.679856	0.561671	0.696896	0.865272	0.7164	0.489297	0.52458	0.695168	0.821628	0.346627	0.758899	0.869386	0.62115	0.646917	0.789041	0.121579	0.157065	0.474689	0.100261	0.493207
229	376	0.458979	0.551165	0.0681708	0.167901	0.310323	0.32013	0.424574	0.527504	0.451181	0.302798	0.495224	0.576523	0.343307	0.50489	0.398215	0.714494	0.573585	0.499159	0.665712	0.775439	0.568384	0.451697	0.533046	0.713307	0.67541	0.31496	0.594852	0.8294	0.745968	0.649207	0.809451	0.973259	0.816276	0.552516	0.560439	0.755839	0.841664	0.450109	0.765404	0.979772	0.707366	0.707531	0.917369	0.108851	0.132188	0.486429	0.096891	0.445976
230	377	0.343561	0.401625	0.409593	0.341794	0.581685	0.291966	1.37815	1.46343	1.32904	1.37876	1.53215	1.53873	1.21345	1.64718	1.44572	1.66599	1.58643	1.35187	0.459897	1.33528	1.9069	1.24562	1.44602	2.00049	0.440818	0.232563	0.458084	0.483728	0.549093	0.434697	0.535522	0.579413	0.572219	0.419345	0.462691	0.611974	0.700727	0.313068	0.623108	0.641314	0.567502	0.502006	0.640678	0.454484	0.641033	0.692287	0.493563	0.7719
231	378	0.480194	0.576239	0.108584	0.205659	0.405645	0.391286	0.457944	0.642945	0.458899	0.403697	0.490733	0.69902	0.400142	0.551872	0.453948	0.778562	0.710531	0.530073	0.827354	0.774744	0.687501	0.514663	0.541082	0.78554	0.671167	0.313739	0.641917	0.868381	0.981706	0.639826	0.819884	1.05284	0.924537	0.574036	0.682774	0.899846	1.07731	0.395348	0.915153	0.999409	0.80226	0.747877	0.990098	0.119388	0.162662	0.592754	0.10299	0.550222
232	379	0.395241	0.475281	0.0406823	0.193987	0.248437	0.28898	0.35161	0.541964	0.362625	0.289474	0.409865	0.516938	0.365148	0.443406	0.38173	0.715802	0.563074	0.477857	0.659057	0.682334	0.600622	0.485947	0.43351	0.706491	0.665007	0.269001	0.575978	0.71953	0.756532	0.595807	0.752813	0.853247	0.721568	0.515369	0.533384	0.658881	0.852366	0.367217	0.699874	0.948704	0.608757	0.667102	0.855453	0.0789578	0.114192	0.407205	0.0630506	0.412311
233	38	0.202151	0.192197	0.873402	0.454141	0.77225	0.227156	0.44493	0.498173	0.478531	0.614187	0.561316	0.429383	0.367572	0.561818	0.48189	0.487937	0.495148	0.454908	0.208312	0.434924	0.562941	0.486365	0.468367	0.547295	0.212591	0.162684	0.205258	0.257742	0.23563	0.120803	0.211446	0.20082	0.241402	0.207539	0.331113	0.280373	0.29057	0.165027	0.298201	0.223244	0.218809	0.210182	0.218885	0.73548	0.892572	0.61492	0.656095	0.605405
234	380	0.432623	0.506772	0.0433571	0.202614	0.342282	0.331955	0.382129	0.708008	0.425933	0.414504	0.456528	0.729123	0.376436	0.568866	0.418031	0.800878	0.817719	0.575842	0.818627	0.846897	0.762532	0.542152	0.58271	0.86408	0.683086	0.263047	0.670674	0.854669	0.896541	0.602385	0.840122	1.05071	0.859009	0.57246	0.702613	0.792609	0.892159	0.367464	0.78017	1.10965	0.779375	0.841527	1.03281	0.0875996	0.127284	0.556235	0.077388	0.498636
235	381	0.480558	0.585021	0.103985	0.220128	0.383135	0.376906	0.434091	0.699957	0.489105	0.336048	0.476242	0.617922	0.416348	0.602285	0.49113	0.792822	0.685468	0.540416	0.756391	0.794026	0.710332	0.506539	0.582438	0.782455	0.702871	0.323544	0.701709	0.787771	0.825306	0.63367	0.843203	1.01754	0.955707	0.636448	0.621416	0.833715	0.9747	0.429087	0.929609	1.10743	0.755284	0.804271	1.05559	0.126795	0.143321	0.571837	0.0846828	0.608463
236	382	0.370116	0.420501	0.0960137	0.183042	0.339388	0.32171	0.343516	0.455086	0.413929	0.303503	0.364033	0.454742	0.378046	0.469087	0.380464	0.61052	0.428578	0.401948	0.58888	0.574984	0.455017	0.354245	0.427681	0.55559	0.579807	0.212686	0.590187	0.688747	0.697604	0.553384	0.610807	0.756619	0.700495	0.491231	0.462491	0.649353	0.818523	0.357548	0.701486	0.717502	0.644733	0.541331	0.768468	0.1242	0.153567	0.444026	0.108255	0.420651
237	383	0.577116	0.592614	0.149093	0.20946	0.443566	0.373616	0.452381	0.483672	0.494377	0.376786	0.457474	0.543049	0.41053	0.65981	0.530739	0.672204	0.599772	0.434134	0.851973	0.698279	0.651692	0.443454	0.518035	0.737724	0.658133	0.35678	0.70319	0.773605	1.01436	0.587612	0.727739	0.888498	0.884468	0.646019	0.637542	0.878734	0.933986	0.490457	0.910249	0.857022	0.811384	0.686583	0.923876	0.182504	0.197772	0.564606	0.174018	0.57599
238	384	0.498135	0.526284	0.0981254	0.264338	0.482534	0.383926	0.436034	0.477843	0.476473	0.328674	0.456914	0.507766	0.407598	0.57486	0.464385	0.704907	0.516429	0.407196	0.77054	0.669479	0.532169	0.383665	0.492492	0.673417	0.577015	0.287571	0.612181	0.58806	0.918509	0.583329	0.61747	0.767089	0.757642	0.581348	0.644025	0.892641	0.913619	0.447326	0.940945	0.892038	0.79156	0.708925	0.861204	0.176535	0.16545	0.60428	0.152518	0.538915
239	385	0.309142	0.397583	0.190798	0.144514	0.33978	0.218748	0.556245	0.722342	0.57282	0.635243	0.692809	0.764943	0.490317	0.705146	0.571998	0.870105	0.833113	0.669684	0.545626	0.848966	1.00816	0.69317	0.755303	0.97929	0.468331	0.256945	0.40525	0.596669	0.564137	0.452215	0.609723	0.634509	0.509961	0.365494	0.450681	0.570236	0.70303	0.290635	0.573276	0.699707	0.59302	0.572752	0.692389	0.181698	0.237509	0.468311	0.207745	0.420641
240	386	0.418308	0.504246	0.0579776	0.128242	0.342944	0.287081	0.364018	0.515579	0.376572	0.28272	0.467269	0.511839	0.326699	0.47196	0.408236	0.689235	0.635583	0.485693	0.728264	0.696251	0.652859	0.489791	0.50345	0.71677	0.614325	0.30844	0.630802	0.810078	0.802255	0.604881	0.786652	0.922547	0.794992	0.604549	0.550951	0.749383	0.841123	0.417167	0.701039	0.887116	0.697471	0.780118	0.919283	0.0920591	0.118554	0.533251	0.0901482	0.47628
241	387	0.442855	0.480905	0.0636011	0.140228	0.261061	0.268059	0.340651	0.567813	0.388669	0.300069	0.463668	0.593732	0.374958	0.459842	0.369456	0.745977	0.643241	0.487579	0.695443	0.727453	0.671859	0.437334	0.551138	0.697306	0.586865	0.305405	0.531669	0.785258	0.757831	0.585228	0.707767	0.874913	0.780376	0.517507	0.573291	0.749967	0.85513	0.341863	0.77833	0.935756	0.647352	0.671279	0.870323	0.107176	0.123063	0.457211	0.082839	0.437811
242	388	0.40242	0.474347	0.0535192	0.165676	0.278224	0.284648	0.645087	0.419292	0.662454	0.224881	0.370011	0.431771	0.589044	0.744941	0.686376	0.848105	0.437514	0.311162	0.580842	1.16587	0.533725	0.329091	0.407308	0.770745	0.480297	0.258575	1.01683	0.593835	0.622591	0.595709	0.581879	0.678656	1.02676	0.928963	0.480091	0.691331	0.782223	0.28854	0.66583	0.840637	0.60601	0.663534	0.797322	0.104108	0.127699	0.470973	0.0983634	0.4322
243	389	0.425055	0.479677	0.0606059	0.17029	0.338742	0.301965	0.414638	0.679732	0.455108	0.356382	0.489451	0.650353	0.409504	0.588982	0.450546	0.774694	0.74644	0.475079	0.788753	0.746376	0.760553	0.507697	0.570638	0.784891	0.642519	0.298374	0.626757	0.829336	0.859833	0.621682	0.861104	0.936691	0.837773	0.53116	0.624504	0.756484	0.922677	0.469319	0.825803	0.970294	0.715678	0.802585	0.973877	0.0760186	0.125671	0.498596	0.109146	0.506919
244	39	0.384996	0.497416	0.0515507	0.19741	0.294694	0.30232	0.370827	0.623361	0.391323	0.322707	0.408049	0.541775	0.387914	0.544708	0.441825	0.742493	0.780089	0.443621	0.687621	0.771135	0.737241	0.497213	0.501194	0.831361	0.698376	0.278557	0.552935	0.786664	0.819457	0.665119	0.78918	1.0378	0.837459	0.483851	0.627005	0.779049	0.875096	0.35236	0.831124	0.982872	0.705104	0.728861	0.906448	0.0915464	0.124192	0.5418	0.0783795	0.471859
245	390	0.0147676	-0.00376153	0.28049	0.149761	0.186251	0.0406628	0.0221814	-0.00681859	0.0580011	0.0746242	0.0568199	-0.0139056	0.018274	0.0229243	0.0253503	-0.0432887	-0.0157571	0.0545179	-0.0336294	-0.0166658	0.00561493	0.0610463	0.0498244	-0.0169181	-0.020237	0.039551	-0.0367871	-0.0645523	-0.0335212	-0.0425771	-0.0420025	-0.0506911	-0.0854237	-0.0317254	0.0254601	-0.0343026	-0.0814313	0.0138666	-0.0282789	-0.0782967	-0.0402361	-0.0570132	-0.0783894	0.333501	0.353518	0.141854	0.304134	0.139591
246	391	0.458959	0.511235	0.0465376	0.182542	0.368409	0.331662	0.404418	0.585996	0.471894	0.345055	0.427672	0.580229	0.401542	0.550892	0.483602	0.743635	0.569556	0.455226	0.719617	0.837527	0.613248	0.465921	0.507968	0.719887	0.63858	0.311911	0.659393	0.741866	0.830119	0.640142	0.739171	0.968471	0.854658	0.581554	0.570572	0.75899	0.913431	0.397702	0.818897	0.978571	0.718367	0.70703	0.936716	0.125693	0.143239	0.568536	0.0847107	0.484048
247	392	0.22935	0.152447	0.79897	0.458671	0.690287	0.180629	0.406495	0.414553	0.374438	0.578279	0.550431	0.389542	0.37377	0.501184	0.406154	0.401133	0.433154	0.393417	0.124964	0.262787	0.504156	0.375037	0.444019	0.497411	0.146526	0.137648	0.130905	0.0900059	0.134611	0.0757877	0.0904417	0.103306	0.153086	0.136727	0.24146	0.181559	0.155353	0.128789	0.238304	0.108305	0.183394	0.0758258	0.121402	0.988004	1.20449	0.701853	1.03795	0.794928
248	393	0.440566	0.493706	0.233123	0.227517	0.482546	0.322327	0.779976	0.928449	0.816916	0.723942	0.95325	0.949298	0.692999	0.95526	0.886264	1.1446	1.04615	0.834612	0.634923	0.999503	1.16526	0.864824	0.939947	1.18203	0.555789	0.278882	0.539666	0.668918	0.701483	0.565858	0.645036	0.816317	0.694236	0.512157	0.543211	0.731406	0.829048	0.328821	0.816303	0.835903	0.657732	0.694235	0.921921	0.281044	0.308494	0.590619	0.256194	0.521249
249	394	0.22519	0.193415	0.652481	0.378881	0.561989	0.22903	1.00772	1.09566	1.00086	1.29612	1.29421	1.0459	0.921988	1.24015	1.03752	1.13108	1.14603	0.926663	0.135911	0.746629	1.27213	0.917254	1.06226	1.29468	0.125981	0.155268	0.16657	0.124021	0.191015	0.114725	0.135817	0.167537	0.173882	0.179987	0.285824	0.221849	0.180768	0.143374	0.23684	0.138529	0.184499	0.111813	0.1409	0.66623	0.90555	0.507202	0.717723	0.583265
250	395	0.406758	0.519186	0.0468515	0.120804	0.278497	0.303115	0.343103	0.556618	0.388471	0.283729	0.390245	0.557156	0.316735	0.467689	0.369278	0.730806	0.589249	0.439014	0.707082	0.778128	0.659098	0.440277	0.554124	0.696214	0.604816	0.289377	0.592525	0.808321	0.829688	0.613905	0.762536	0.864445	0.80749	0.577636	0.592345	0.688755	0.850704	0.382046	0.804063	0.922275	0.6717	0.778389	0.919872	0.0861551	0.121092	0.434483	0.101845	0.446837
251	396	0.218995	0.219956	0.647684	0.351314	0.51331	0.176419	1.03382	1.17494	1.04014	1.39803	1.35335	1.0941	0.955827	1.31394	1.17739	1.23225	1.19159	1.02747	0.155202	0.86682	1.37899	1.0162	1.16365	1.45847	0.163587	0.204865	0.179778	0.12672	0.181292	0.110781	0.119781	0.190657	0.20808	0.17765	0.270201	0.22206	0.179017	0.116624	0.253691	0.151838	0.193297	0.125905	0.168603	0.621059	0.827416	0.505923	0.681266	0.548941
252	397	0.288412	0.257563	0.647768	0.401959	0.533224	0.251424	1.12304	1.14901	1.02611	1.34422	1.32529	1.14798	0.959311	1.29811	1.12674	1.23174	1.2233	0.966707	0.162982	0.905906	1.3006	0.982885	1.08307	1.42164	0.170235	0.198486	0.224435	0.162877	0.209443	0.147293	0.208218	0.222265	0.20354	0.225972	0.296024	0.277504	0.242544	0.173503	0.269483	0.199082	0.225931	0.158721	0.21081	0.676278	0.857267	0.516651	0.716974	0.616333
253	398	0.28139	0.340857	0.316621	0.220061	0.515501	0.283952	0.932553	1.04515	0.880517	0.977491	1.11889	1.05346	0.849373	1.1137	1.00111	1.15886	1.20043	0.904395	0.41658	0.849124	1.38857	0.934057	1.10645	1.38555	0.381991	0.178733	0.381487	0.473366	0.480558	0.358878	0.419629	0.555818	0.504771	0.383337	0.413322	0.477414	0.490673	0.190946	0.502077	0.50055	0.40478	0.433061	0.521101	0.361756	0.524364	0.533986	0.430737	0.559001
254	399	0.40845	0.448885	0.0761749	0.106338	0.327008	0.299049	0.353785	0.61425	0.377113	0.359043	0.385983	0.600886	0.33737	0.433425	0.346023	0.645186	0.515227	0.391298	0.680928	0.61207	0.608559	0.407627	0.521351	0.684527	0.58053	0.266345	0.57098	0.753944	0.712343	0.506227	0.734673	0.827814	0.742295	0.489731	0.556064	0.680563	0.753483	0.340147	0.780975	0.863859	0.640196	0.752483	0.805194	0.0997174	0.130698	0.420491	0.109926	0.403301
255	40	0.458262	0.525461	0.0587002	0.18692	0.364216	0.278895	0.645119	0.584892	0.683536	0.319787	0.428136	0.546163	0.559917	0.901936	0.728884	0.98858	0.708322	0.45478	0.771694	0.906889	0.69869	0.491825	0.548929	0.938894	0.647191	0.284526	1.00885	0.830206	0.876006	0.795426	0.839185	0.946118	1.03635	0.902815	0.593114	0.782256	0.852826	0.341786	0.801018	0.946692	0.731377	0.759862	0.916382	0.0963139	0.132269	0.544828	0.0933993	0.475678
256	400	0.621465	0.642533	0.145278	0.2128	0.536052	0.455143	0.489438	0.519664	0.527814	0.369088	0.524912	0.578542	0.455867	0.613609	0.528763	0.727151	0.577267	0.402011	0.891369	0.731763	0.656659	0.438576	0.595294	0.822236	0.682542	0.328174	0.762675	0.814142	0.907802	0.586489	0.819617	0.930762	0.877214	0.650018	0.783945	0.975318	1.04891	0.44297	1.14392	0.930412	0.929339	0.843588	0.921561	0.140446	0.200388	0.597966	0.194344	0.681131
257	401	0.332804	0.348492	0.483048	0.335184	0.551861	0.24071	1.32027	1.40489	1.34206	1.53146	1.63801	1.42423	1.14729	1.57738	1.4618	1.57303	1.59864	1.37202	0.362127	1.18491	1.92728	1.4555	1.51694	2.03348	0.334632	0.213316	0.363254	0.369988	0.43821	0.332462	0.38621	0.432509	0.42271	0.347172	0.413477	0.449248	0.448821	0.233964	0.483683	0.497381	0.399651	0.343426	0.486809	0.581838	0.790695	0.62451	0.650151	0.689536
258	402	0.412593	0.462298	0.105701	0.195664	0.363906	0.311493	0.463556	0.633793	0.426449	0.361349	0.465158	0.704019	0.402466	0.607721	0.536872	0.776179	0.631783	0.477625	0.71487	0.760488	0.761858	0.562831	0.590054	0.849452	0.530824	0.249673	0.646357	0.81094	0.839065	0.605088	0.802858	0.943695	0.827042	0.562963	0.544064	0.739054	0.837411	0.35967	0.792179	0.95048	0.706512	0.731775	0.910728	0.115978	0.173932	0.496636	0.0887851	0.491175
259	403	0.4971	0.58685	0.0893919	0.204901	0.369747	0.377156	0.476787	0.611032	0.485693	0.3278	0.505563	0.575546	0.427597	0.56986	0.495612	0.792321	0.69484	0.494457	0.770211	0.748976	0.685829	0.501771	0.521783	0.781593	0.657052	0.381742	0.663375	0.824585	0.887305	0.57119	0.711869	0.922962	0.833727	0.569785	0.697523	0.935093	1.05035	0.465282	0.997255	0.998948	0.853114	0.80091	0.98623	0.130117	0.170922	0.603338	0.108676	0.571665
260	404	0.298438	0.363078	0.256312	0.211912	0.459436	0.204597	0.784029	0.938867	0.778441	0.798101	0.902644	0.948191	0.738975	0.919794	0.805899	0.999996	0.963697	0.707002	0.51919	0.764331	1.1826	0.735455	0.973691	1.2521	0.471812	0.212372	0.446681	0.576398	0.62122	0.403503	0.543643	0.675117	0.615054	0.391141	0.471814	0.571198	0.623652	0.200171	0.558852	0.670577	0.522478	0.52886	0.63249	0.272526	0.399616	0.495236	0.293923	0.513677
261	406	0.295333	0.333524	0.377959	0.223587	0.506752	0.227686	1.02778	1.17113	0.975234	1.06627	1.15657	1.09154	0.86324	1.18363	1.09573	1.28217	1.21588	0.882744	0.418971	0.779666	1.37076	0.931307	1.22979	1.5004	0.363756	0.146463	0.361671	0.495602	0.442815	0.311806	0.462214	0.610868	0.45321	0.342551	0.416	0.44535	0.510309	0.153933	0.51105	0.552199	0.403104	0.42816	0.523926	0.39315	0.537578	0.571388	0.46205	0.630847
262	407	0.457074	0.483347	0.112399	0.260739	0.431532	0.381695	0.441857	0.462442	0.444926	0.32047	0.432862	0.468232	0.425915	0.575846	0.505566	0.678161	0.525233	0.397099	0.683317	0.742359	0.56147	0.368494	0.489991	0.72436	0.563854	0.306626	0.622574	0.62176	0.810773	0.523255	0.667632	0.762249	0.78642	0.623662	0.629427	0.804979	0.8845	0.416453	0.847829	0.866765	0.810137	0.731495	0.912807	0.142868	0.157437	0.528836	0.123188	0.58021
263	409	0.376329	0.405101	0.656234	0.47628	0.742391	0.30037	0.606206	0.658206	0.606058	0.636965	0.667944	0.721458	0.578584	0.783785	0.633863	0.774055	0.789654	0.605383	0.438904	0.807398	0.807905	0.604365	0.653348	0.889224	0.433653	0.232431	0.412888	0.520476	0.541897	0.390119	0.540936	0.598971	0.578238	0.393906	0.513747	0.529961	0.620345	0.273926	0.586996	0.612392	0.495195	0.433998	0.624144	0.615247	0.754657	0.836488	0.560837	0.760951
264	41	0.439099	0.488036	0.0552869	0.131001	0.306569	0.282221	0.368064	0.57816	0.408845	0.33394	0.457768	0.519203	0.363785	0.476344	0.406586	0.681392	0.751452	0.44468	0.793029	0.714384	0.6875	0.469513	0.495633	0.727599	0.713872	0.272074	0.606723	0.845484	0.84347	0.632966	0.87658	1.01344	0.82421	0.541948	0.653418	0.807255	0.858591	0.360212	0.817056	1.01407	0.696848	0.778421	0.93347	0.103272	0.0994723	0.507592	0.0583401	0.460188
265	410	0.45483	0.453235	0.11509	0.194774	0.357265	0.315527	0.418205	0.448172	0.448674	0.314366	0.431138	0.530228	0.386487	0.554893	0.43959	0.586198	0.489037	0.340196	0.682266	0.520254	0.509385	0.354476	0.412219	0.656324	0.498282	0.283498	0.613949	0.653211	0.788566	0.460273	0.627639	0.712793	0.693609	0.554796	0.580942	0.789077	0.862604	0.32908	0.848226	0.741647	0.727271	0.64098	0.791179	0.131379	0.139237	0.475658	0.131604	0.566602
266	411	0.42936	0.558213	0.103944	0.165387	0.349393	0.358229	0.430487	0.642626	0.44141	0.366037	0.482189	0.620127	0.349859	0.581362	0.427818	0.775444	0.712997	0.57729	0.77223	0.82576	0.737501	0.50111	0.561109	0.770773	0.689132	0.352225	0.580808	0.832992	0.8691	0.656398	0.837099	0.992418	0.850855	0.607124	0.57887	0.930145	0.990111	0.44291	0.919094	1.00362	0.753176	0.713232	0.912662	0.106695	0.154489	0.606496	0.0857941	0.550046
267	413	0.374031	0.361248	0.139287	0.101217	0.266143	0.269307	0.658928	0.319439	0.704027	0.185196	0.304625	0.306065	0.585946	0.783139	0.720618	0.703168	0.324867	0.211809	0.517776	0.641897	0.424513	0.282397	0.29918	0.590336	0.362375	0.210596	1.2442	0.53383	0.564157	0.48826	0.542018	0.555878	1.05285	1.15031	0.423253	0.576162	0.620671	0.254195	0.583956	0.575301	0.517028	0.48016	0.578702	0.137314	0.168509	0.326268	0.14918	0.313474
268	414	0.432931	0.465443	0.119017	0.192976	0.355647	0.359658	0.378863	0.448028	0.48579	0.29833	0.40077	0.443721	0.327295	0.49566	0.440717	0.568216	0.436944	0.350659	0.639222	0.5134	0.47522	0.348075	0.408435	0.588694	0.503653	0.275454	0.499775	0.50539	0.713324	0.448613	0.591278	0.660903	0.626169	0.47371	0.618221	0.758418	0.733822	0.374577	0.849886	0.703415	0.740069	0.660232	0.754323	0.162336	0.175236	0.477052	0.138148	0.519441
269	415	0.298513	0.284556	0.402715	0.264415	0.569527	0.233462	1.16607	1.31439	1.13674	1.32655	1.38273	1.20372	1.06687	1.41004	1.2616	1.38888	1.35039	1.05937	0.38495	0.960957	1.62584	1.14692	1.35495	1.71154	0.310651	0.17609	0.373182	0.396414	0.409851	0.322179	0.408875	0.496318	0.485997	0.334455	0.45398	0.497618	0.523591	0.191166	0.504735	0.499893	0.431569	0.42496	0.506991	0.505967	0.675127	0.605779	0.556267	0.655609
270	416	0.503643	0.586122	0.099036	0.209368	0.392138	0.38039	0.487665	0.605903	0.488425	0.35587	0.49872	0.584344	0.437014	0.595774	0.504734	0.825587	0.667719	0.492959	0.802525	0.785635	0.701434	0.516216	0.535467	0.797783	0.676195	0.36747	0.687124	0.848931	0.9129	0.602769	0.719391	0.955493	0.870415	0.576977	0.722887	0.96915	1.07052	0.485923	1.05331	1.02425	0.862763	0.81514	1.00035	0.150442	0.179985	0.616461	0.124183	0.586817
271	418	0.400368	0.466767	0.0682537	0.18135	0.271427	0.310667	0.335486	0.53963	0.312655	0.307545	0.382724	0.515029	0.349917	0.403328	0.351981	0.63419	0.556624	0.371458	0.592527	0.692448	0.581191	0.389636	0.474428	0.624926	0.557774	0.283661	0.484364	0.723649	0.691341	0.590105	0.687255	0.807549	0.714917	0.455912	0.516104	0.591702	0.737079	0.37869	0.631416	0.854416	0.603577	0.580267	0.779443	0.0687394	0.0990337	0.456005	0.0557662	0.403075
272	419	0.446408	0.491355	0.468389	0.305359	0.665082	0.297554	1.33932	1.57288	1.22601	1.38178	1.52762	1.44967	1.13254	1.56371	1.475	1.74003	1.62395	1.15395	0.633416	1.20916	1.79866	1.19125	1.55284	1.96427	0.579392	0.26449	0.535647	0.746678	0.637132	0.465688	0.655357	0.732884	0.721615	0.485479	0.603341	0.636682	0.732748	0.258551	0.684239	0.731934	0.572075	0.610248	0.737816	0.436936	0.652178	0.740738	0.516888	0.780941
273	42	0.451754	0.523717	0.0893179	0.111307	0.334223	0.298245	0.697825	0.551681	0.728229	0.319938	0.432383	0.516345	0.666101	0.864832	0.848503	1.03878	0.573418	0.390688	0.776808	0.865527	0.589431	0.435454	0.512812	0.98387	0.585479	0.259712	1.21028	0.823444	0.705424	0.786939	0.767699	0.827402	1.05237	1.07244	0.616554	0.782609	0.886286	0.307776	0.790657	0.860452	0.654809	0.660624	0.806167	0.106251	0.122887	0.50928	0.0781916	0.479665
274	420	0.3662	0.397922	0.223839	0.207835	0.406827	0.264721	0.550067	0.660359	0.541164	0.578512	0.67786	0.664607	0.484292	0.693134	0.534336	0.775623	0.753123	0.628158	0.605571	0.694477	0.996586	0.642968	0.785761	1.0184	0.499414	0.176034	0.449643	0.658781	0.599553	0.464061	0.616249	0.776907	0.653412	0.391997	0.537157	0.602621	0.705028	0.236692	0.588715	0.732069	0.552495	0.558479	0.719178	0.201894	0.273949	0.514555	0.251391	0.507544
275	421	0.220896	0.188325	0.852209	0.424146	0.766572	0.220614	0.49273	0.479972	0.488047	0.714561	0.680725	0.501874	0.434345	0.582949	0.49271	0.512994	0.528402	0.401689	0.142764	0.277687	0.572779	0.417799	0.525929	0.576715	0.145753	0.131124	0.183487	0.119552	0.146211	0.0903103	0.118181	0.112539	0.144782	0.173699	0.310161	0.188665	0.172948	0.101765	0.25677	0.117239	0.207375	0.124588	0.162393	1.0481	1.36945	0.784859	1.18599	0.823969
276	422	0.380278	0.377728	0.120232	0.112034	0.242538	0.238313	0.658762	0.329704	0.705249	0.254572	0.317859	0.319439	0.599275	0.8453	0.783382	0.737946	0.341777	0.292339	0.491008	0.676496	0.414026	0.302889	0.369903	0.664892	0.428848	0.218262	1.19507	0.541129	0.501655	0.509271	0.50778	0.547927	0.938199	1.12232	0.45335	0.565307	0.652049	0.260626	0.63827	0.609145	0.504534	0.487747	0.583243	0.124755	0.169225	0.389214	0.140733	0.336379
277	423	0.21913	0.134896	1.05196	0.48277	0.850128	0.192317	0.409638	0.418347	0.35267	0.579919	0.506867	0.322036	0.3541	0.4709	0.39598	0.323875	0.361381	0.356951	0.112186	0.241896	0.501302	0.403529	0.439993	0.470289	0.127188	0.143006	0.130313	0.10683	0.125272	0.0390215	0.110333	0.112009	0.135171	0.150929	0.263383	0.157265	0.158955	0.103957	0.186227	0.0949896	0.19166	0.0555673	0.100802	0.825275	1.06435	0.584015	0.866786	0.601508
278	424	0.385965	0.434197	0.611478	0.463338	0.687406	0.338426	1.64822	1.77845	1.6132	1.8087	1.95803	1.79393	1.44296	1.94787	1.75035	2.10905	1.98477	1.86452	0.40607	1.82176	2.403	1.73875	2.08599	2.60432	0.430924	0.282165	0.497667	0.446716	0.457988	0.428313	0.403608	0.556796	0.551949	0.444385	0.540092	0.547068	0.574084	0.230382	0.628238	0.576623	0.443115	0.431736	0.547305	0.688909	0.915494	0.839893	0.737495	0.830848
279	425	0.458557	0.564506	0.0850361	0.187985	0.398411	0.342723	0.446461	0.71158	0.463059	0.387447	0.547265	0.708091	0.38459	0.552706	0.437916	0.829631	0.806367	0.510948	0.667115	0.832582	0.750955	0.524339	0.587625	0.804916	0.651955	0.328593	0.547034	0.867555	0.801207	0.68101	0.823993	1.01033	0.825295	0.515812	0.627302	0.729612	0.833243	0.398426	0.782595	0.995268	0.610978	0.759371	0.983297	0.097705	0.143895	0.5206	0.094771	0.510971
280	426	0.35169	0.379257	0.370085	0.268552	0.538607	0.270076	1.16979	1.30952	1.12564	1.19641	1.2971	1.26142	1.03333	1.34345	1.20185	1.49692	1.41736	1.11088	0.448356	1.17674	1.57189	1.09101	1.22729	1.61397	0.446192	0.213709	0.392702	0.573374	0.519642	0.41739	0.531164	0.573616	0.5805	0.340693	0.433269	0.53387	0.596754	0.271775	0.49822	0.646177	0.433119	0.476291	0.538312	0.398697	0.563725	0.634538	0.468752	0.666846
281	427	0.380508	0.414068	0.132754	0.169497	0.382276	0.296138	0.48526	0.69925	0.510168	0.488601	0.617772	0.586918	0.486394	0.593559	0.569149	0.814999	0.678507	0.508649	0.636883	0.737758	0.759644	0.590132	0.612103	0.836567	0.596567	0.258862	0.534563	0.766265	0.690827	0.524222	0.704563	0.801566	0.792721	0.441753	0.470873	0.575557	0.763394	0.274585	0.70248	0.82864	0.601574	0.677383	0.854339	0.173624	0.24094	0.495082	0.169319	0.455479
282	428	0.378775	0.423136	0.11337	0.122055	0.335766	0.304842	0.340731	0.435989	0.426208	0.298805	0.35267	0.442297	0.311321	0.410353	0.416243	0.561487	0.486732	0.305096	0.630128	0.574747	0.537187	0.358182	0.407678	0.633976	0.529342	0.247951	0.586944	0.827894	0.627079	0.507461	0.734881	0.812961	0.764431	0.54599	0.534753	0.651874	0.816751	0.359932	0.752856	0.793245	0.646204	0.657812	0.834496	0.129918	0.129122	0.461128	0.128747	0.407241
283	43	0.415625	0.436046	0.0371281	0.1561	0.32885	0.286679	0.532471	0.555797	0.55639	0.326096	0.373868	0.587677	0.49887	0.741907	0.591712	0.797801	0.658999	0.418901	0.669857	0.81898	0.611582	0.418733	0.489391	0.7901	0.554187	0.277825	0.797981	0.818434	0.795906	0.715074	0.771502	0.959823	0.989702	0.724427	0.562425	0.778848	0.812836	0.303586	0.709506	0.912055	0.68549	0.740943	0.859896	0.0549581	0.0989171	0.471315	0.0732036	0.481214
284	430	0.363183	0.427723	0.0372206	0.134453	0.303515	0.24723	0.31138	0.601456	0.418014	0.340386	0.391347	0.557334	0.343264	0.472066	0.390086	0.624333	0.563182	0.417715	0.648392	0.584815	0.664706	0.476062	0.565529	0.713895	0.57778	0.206639	0.519294	0.81972	0.711543	0.524014	0.828625	0.851844	0.8064	0.469913	0.53266	0.611186	0.785325	0.30998	0.644774	0.883985	0.612015	0.682782	0.858697	0.058227	0.105711	0.407192	0.0845213	0.422414
285	431	0.46325	0.568093	0.266371	0.31354	0.508703	0.382925	1.09172	1.31325	1.09858	1.03778	1.27646	1.33347	0.988392	1.32107	1.19487	1.60835	1.40792	1.06742	0.604788	1.25582	1.48342	1.03838	1.33727	1.78876	0.603247	0.29435	0.517004	0.777056	0.718933	0.630432	0.686718	0.925656	0.830068	0.484168	0.588699	0.67655	0.888217	0.322905	0.726326	0.924597	0.701707	0.725245	0.885926	0.317285	0.476257	0.72261	0.411353	0.801153
286	432	0.298216	0.310204	0.24656	0.301325	0.362547	0.230137	0.898724	0.990553	0.892528	0.967708	1.06551	1.05964	0.793214	0.987675	0.901838	1.20683	1.06145	0.95508	0.265148	1.05869	1.13281	0.91293	0.980245	1.29987	0.340403	0.20099	0.225325	0.294734	0.340054	0.340702	0.257788	0.373656	0.294542	0.224169	0.267697	0.31667	0.331433	0.180925	0.314031	0.375827	0.276601	0.283883	0.373681	0.333144	0.392166	0.394411	0.299605	0.416806
287	433	0.245659	0.298056	0.269678	0.298064	0.359325	0.233086	0.729315	0.870194	0.736227	0.848748	0.8558	0.861101	0.743002	0.963866	0.777848	0.985816	0.963298	0.992954	0.275447	1.01864	1.11872	0.811659	0.774125	1.13529	0.331521	0.276885	0.311534	0.373953	0.392386	0.331378	0.337882	0.430521	0.376384	0.215816	0.281105	0.310835	0.35481	0.22925	0.368625	0.386065	0.289119	0.319534	0.359005	0.336488	0.389035	0.413529	0.267824	0.418436
288	435	0.0267281	0.034392	0.155749	0.111096	0.0328502	0.0341258	0.18837	0.258402	0.233092	0.391473	0.360858	0.244901	0.19643	0.224997	0.237578	0.24067	0.295323	0.350878	-0.00441907	0.101039	0.442307	0.419049	0.425883	0.3836	-0.00358363	0.0342859	-0.0394888	-0.0514757	-0.0219007	-0.01354	-0.0377614	-0.0373864	-0.0600431	0.0186667	0.0309406	-0.0288306	-0.0621611	0.0213392	0.0136206	-0.053251	-0.0349518	-0.00799628	-0.0292145	0.172474	0.220249	0.110584	0.24764	0.102851
289	437	0.242065	0.179089	0.732385	0.411846	0.566482	0.200434	1.05424	1.03779	0.986735	1.30296	1.21992	1.01136	0.847041	1.23905	1.09197	1.05621	1.08763	0.916202	0.130698	0.776196	1.23544	0.852715	1.01501	1.24723	0.165694	0.196248	0.166276	0.0963332	0.154421	0.103797	0.0716297	0.117318	0.158703	0.172534	0.234998	0.216073	0.162293	0.106696	0.229469	0.134964	0.168058	0.0907246	0.134505	0.704176	0.962408	0.541146	0.773786	0.573729
290	438	0.3604	0.425158	0.0574801	0.164759	0.287475	0.264838	0.377975	0.538691	0.33811	0.320879	0.404875	0.528493	0.345715	0.436797	0.361064	0.648191	0.558629	0.405607	0.71539	0.659014	0.563952	0.371149	0.387032	0.650684	0.547268	0.265692	0.510078	0.689886	0.729266	0.532844	0.703867	0.79318	0.747717	0.456498	0.494298	0.605404	0.71083	0.329409	0.620961	0.862284	0.561189	0.671752	0.841669	0.0988097	0.116955	0.452928	0.051823	0.413563
291	439	0.411192	0.42518	0.103518	0.105201	0.344053	0.266223	0.579619	0.47865	0.60578	0.293119	0.400322	0.516769	0.582101	0.761337	0.673007	0.759741	0.551725	0.409771	0.622112	0.76055	0.55782	0.370867	0.522021	0.796083	0.566834	0.242467	1.0271	0.669529	0.727419	0.569336	0.647095	0.733822	0.956248	0.868591	0.569768	0.708312	0.795556	0.294411	0.718336	0.833162	0.58521	0.674063	0.78899	0.104962	0.155105	0.513598	0.0751346	0.426097
292	44	0.481314	0.633113	0.061466	0.212145	0.349653	0.303286	0.351104	0.704504	0.437093	0.288154	0.459565	0.602441	0.391302	0.449512	0.411549	0.928818	0.829709	0.543851	0.697994	0.956661	0.666833	0.512563	0.521346	0.707692	0.749894	0.337572	0.609928	0.840549	0.867909	0.753169	0.840583	0.994279	0.805524	0.525244	0.580085	0.775176	0.892301	0.479119	0.750042	0.990604	0.656872	0.662221	0.863197	0.0807088	0.0927369	0.54613	0.0383723	0.491546
293	440	0.394962	0.531162	0.0595535	0.123232	0.310319	0.358615	0.409192	0.650619	0.386277	0.323188	0.447806	0.56425	0.33664	0.458311	0.378854	0.692564	0.704204	0.436056	0.731003	0.68176	0.657666	0.450707	0.589375	0.815025	0.584871	0.266149	0.594502	0.852622	0.861065	0.578817	0.816138	1.01867	0.819594	0.524905	0.577793	0.765957	0.860275	0.328569	0.774808	0.922746	0.695556	0.706571	0.884639	0.060704	0.112344	0.496313	0.115956	0.42729
294	441	0.203604	0.286098	0.0343525	0.106334	0.186619	0.208685	0.163198	0.282803	0.164814	0.162321	0.216707	0.313361	0.176517	0.218551	0.193968	0.371021	0.308032	0.254323	0.323408	0.450628	0.272182	0.256518	0.2053	0.328423	0.370408	0.210719	0.263841	0.388228	0.375007	0.417204	0.359947	0.465926	0.356455	0.229428	0.282775	0.343816	0.391659	0.243855	0.270826	0.477141	0.259049	0.291	0.403809	0.0502991	0.0662385	0.246721	0.041597	0.216449
295	442	0.593028	0.638846	0.13761	0.176733	0.356783	0.533435	0.696346	0.396771	0.72043	0.332324	0.386363	0.424394	0.621107	0.845537	0.787045	0.824871	0.471507	0.303264	0.560298	0.718698	0.49882	0.344929	0.425268	0.777298	0.579813	0.378717	1.11857	0.558536	0.555174	0.525726	0.556788	0.619637	1.14696	0.96311	0.671766	0.624133	0.738678	0.297733	0.645866	0.639576	0.611671	0.521111	0.634544	0.187875	0.201017	0.371046	0.154376	0.423753
296	443	0.408582	0.387881	0.0942534	0.0830623	0.208204	0.263501	0.699955	0.319199	0.736735	0.246187	0.277002	0.359344	0.625687	0.798937	0.782936	0.777081	0.386856	0.271696	0.442255	0.710134	0.377915	0.283039	0.278506	0.686116	0.40855	0.242102	1.1138	0.491248	0.449697	0.540461	0.472149	0.53006	0.982972	1.09985	0.448981	0.528854	0.565819	0.231812	0.533785	0.565867	0.488687	0.494024	0.563949	0.114932	0.161649	0.41146	0.11785	0.303665
297	444	0.204252	0.165258	0.625934	0.327302	0.48771	0.182774	1.09395	1.14019	1.01135	1.34286	1.33238	1.02721	0.939125	1.22727	1.13099	1.15088	1.12011	0.941328	0.0909418	0.684876	1.34232	0.960629	1.11415	1.38873	0.137196	0.173612	0.191111	0.0893723	0.144461	0.0921394	0.103455	0.118413	0.112617	0.145222	0.232132	0.207513	0.181572	0.112947	0.184722	0.145815	0.148732	0.105374	0.15766	0.617828	0.849885	0.44064	0.745584	0.539684
298	445	0.258413	0.327978	0.0605508	0.232692	0.180385	0.243745	0.30407	0.40239	0.385744	0.26046	0.30796	0.482252	0.350797	0.319046	0.314743	0.583312	0.452664	0.440255	0.340311	0.725172	0.466382	0.414797	0.328234	0.512995	0.359882	0.380665	0.265842	0.346026	0.395267	0.521461	0.343092	0.459283	0.306051	0.264267	0.266547	0.383961	0.422307	0.3546	0.408743	0.454806	0.364918	0.32375	0.478841	0.12082	0.0687899	0.330874	0.0798271	0.313532
299	446	0.37237	0.478432	0.0778222	0.107278	0.295384	0.316994	0.36686	0.593964	0.365502	0.31823	0.440803	0.534703	0.311239	0.409285	0.341433	0.624234	0.630841	0.403325	0.744194	0.628872	0.65467	0.474587	0.567576	0.759935	0.582173	0.257202	0.593661	0.85324	0.829153	0.533195	0.796919	0.985912	0.798571	0.494907	0.593918	0.729941	0.814888	0.33449	0.736864	0.876184	0.664204	0.661304	0.867364	0.089224	0.1308	0.454707	0.119668	0.398924
300	447	0.264617	0.182254	0.569172	0.317808	0.490624	0.201178	1.04424	1.02828	0.92535	1.22075	1.22271	0.963388	0.836097	1.07194	0.998727	1.06481	1.03017	0.869708	0.161385	0.669277	1.18586	0.917446	1.02628	1.32229	0.15958	0.161119	0.180239	0.133967	0.205677	0.157558	0.160257	0.212015	0.204802	0.186823	0.279813	0.187662	0.191703	0.0946992	0.220407	0.190098	0.213369	0.130327	0.211928	0.575779	0.751325	0.454928	0.670078	0.510119
301	448	0.473646	0.468609	0.094857	0.207339	0.346661	0.294481	0.398037	0.60319	0.4628	0.348095	0.440921	0.562619	0.402086	0.497657	0.466553	0.733966	0.573399	0.465341	0.741844	0.79858	0.690424	0.490152	0.473245	0.773423	0.672558	0.253121	0.659847	0.834655	0.791414	0.626752	0.843064	0.974172	0.874604	0.553071	0.623629	0.755102	0.93453	0.411135	0.742589	0.969371	0.681537	0.734278	0.932323	0.106141	0.16794	0.586129	0.103141	0.503279
302	449	0.407535	0.473211	0.0958276	0.16915	0.295844	0.338407	0.459218	0.566407	0.404969	0.379692	0.474598	0.605638	0.399589	0.538169	0.429877	0.725847	0.586315	0.47918	0.632436	0.702029	0.631602	0.452728	0.540483	0.747427	0.60543	0.274309	0.528892	0.72521	0.761602	0.544323	0.731737	0.896476	0.781786	0.57306	0.563029	0.704811	0.857641	0.390597	0.800058	0.973707	0.675695	0.67999	0.817788	0.107042	0.171205	0.568684	0.15322	0.420299
303	45	0.305798	0.344366	0.0614044	0.149554	0.210074	0.235225	0.417186	0.346843	0.48055	0.21414	0.230904	0.323393	0.436837	0.57142	0.489318	0.619843	0.443242	0.29448	0.451508	0.572345	0.365627	0.295283	0.273133	0.551232	0.415889	0.256642	0.674961	0.458271	0.528511	0.540538	0.441138	0.51022	0.675164	0.641643	0.370587	0.508653	0.545671	0.282236	0.483423	0.554039	0.425324	0.434263	0.532362	0.0653778	0.0579955	0.332324	0.0540794	0.271239
304	453	0.387908	0.487669	0.181281	0.181125	0.351301	0.26328	0.589563	0.698447	0.476089	0.441256	0.566277	0.69293	0.469872	0.661003	0.569734	0.769814	0.746418	0.594884	0.598557	0.773972	0.842445	0.64582	0.670065	0.909219	0.55281	0.322695	0.507279	0.729729	0.730362	0.50882	0.686858	0.817366	0.760372	0.516159	0.592709	0.665133	0.736891	0.317101	0.653828	0.805019	0.574334	0.574288	0.716797	0.144974	0.207756	0.512695	0.173183	0.433201
305	454	0.410483	0.412724	0.113326	0.135626	0.270135	0.286591	0.748503	0.351515	0.745715	0.248069	0.27029	0.366745	0.651434	0.878604	0.826187	0.818287	0.387178	0.300972	0.511415	0.732645	0.451618	0.303237	0.319226	0.706339	0.457478	0.23958	1.14442	0.510953	0.55304	0.603449	0.464955	0.575434	0.948972	1.05571	0.475793	0.578417	0.650936	0.32806	0.566201	0.584379	0.490303	0.463736	0.589026	0.116431	0.155255	0.414209	0.0961419	0.353263
306	455	0.502367	0.555504	0.107614	0.20232	0.344431	0.33184	0.386991	0.459112	0.432722	0.279025	0.380125	0.487988	0.474508	0.493994	0.442751	0.720063	0.461118	0.464484	0.61843	0.718422	0.482668	0.384483	0.415399	0.639257	0.639254	0.349187	0.622024	0.689187	0.706138	0.622929	0.637591	0.850009	0.756008	0.566492	0.533759	0.831307	0.911846	0.509368	0.878814	0.840665	0.692355	0.628751	0.815258	0.13808	0.173877	0.499537	0.113373	0.579182
307	456	0.414379	0.527281	0.111595	0.177458	0.334499	0.422231	0.373592	0.46012	0.373438	0.258191	0.370983	0.423875	0.366852	0.47711	0.449398	0.608876	0.412643	0.356624	0.547258	0.644504	0.458607	0.306	0.378615	0.646355	0.594883	0.30518	0.613056	0.664324	0.648638	0.556738	0.562711	0.766275	0.660517	0.562478	0.53585	0.766004	0.834237	0.443426	0.827611	0.747252	0.787778	0.593842	0.760789	0.136277	0.156329	0.484549	0.109036	0.513806
308	457	0.124995	0.155616	0.0306753	0.090856	0.0653802	0.129341	0.0307698	0.0382467	0.0494682	0.0273525	0.0509874	0.0515817	0.0318362	0.0576545	0.077822	0.067166	0.0391483	0.0578656	0.117012	0.0961683	0.0382181	0.0776159	0.088258	0.00455348	0.0737399	0.109767	0.0514985	0.0751214	0.201795	0.108184	0.0476472	0.101423	0.0625105	0.116594	0.127417	0.212105	0.180563	0.151178	0.161752	0.16417	0.137255	0.117832	0.140994	0.0618062	0.0581215	0.0721494	0.0356536	0.0530226
309	458	0.462163	0.492863	0.114319	0.212353	0.352171	0.309146	0.42299	0.609908	0.439367	0.407377	0.496149	0.566912	0.425942	0.512562	0.510861	0.738856	0.616848	0.497123	0.707044	0.793393	0.679159	0.474723	0.541683	0.80244	0.739314	0.364113	0.554665	0.759769	0.775974	0.647831	0.770462	0.898121	0.868132	0.524781	0.611784	0.698428	0.829823	0.352616	0.720198	0.915114	0.675937	0.738649	0.887485	0.139259	0.172644	0.536616	0.137743	0.533557
310	459	0.388109	0.437943	0.293189	0.240427	0.513526	0.277694	0.900307	1.03269	0.850723	0.859767	1.05304	1.02564	0.732041	1.07068	0.955974	1.17113	1.14113	0.926217	0.574639	1.00266	1.34795	0.913879	1.04564	1.39964	0.52281	0.270173	0.486586	0.675203	0.73034	0.488566	0.666935	0.799091	0.692866	0.479203	0.535579	0.654561	0.720233	0.249132	0.647631	0.743069	0.545914	0.62181	0.739296	0.309577	0.426355	0.659936	0.365816	0.684249
311	46	0.476799	0.484533	0.338468	0.318265	0.580881	0.329131	1.19648	0.981828	1.08045	0.845829	1.01227	1.02336	1.0689	1.42025	1.35035	1.46963	1.05041	0.898065	0.538585	1.20749	1.22027	0.913203	0.98176	1.5093	0.547185	0.261567	0.945228	0.608529	0.628641	0.651907	0.562469	0.717525	0.942425	0.866159	0.553877	0.64235	0.810347	0.241615	0.707062	0.722662	0.563925	0.580533	0.694206	0.415444	0.497687	0.647334	0.377222	0.666206
312	460	0.428914	0.423689	0.354378	0.283085	0.483087	0.324911	1.06615	1.14775	1.00892	1.04544	1.19905	1.15892	0.885917	1.21463	1.04537	1.3049	1.26894	0.994098	0.498408	1.00151	1.42188	0.96975	1.19093	1.50841	0.472584	0.266745	0.447318	0.561214	0.506132	0.4568	0.554995	0.669249	0.622479	0.400226	0.479247	0.540563	0.586919	0.20576	0.576656	0.629658	0.464771	0.431385	0.562736	0.447173	0.595425	0.619954	0.509117	0.659943
313	461	0.43147	0.536861	0.0821993	0.166031	0.341082	0.344617	0.409377	0.668589	0.371097	0.378625	0.431	0.571033	0.400369	0.508141	0.40869	0.716036	0.621666	0.429612	0.72438	0.760241	0.652948	0.440721	0.496309	0.749497	0.640944	0.313057	0.527076	0.814499	0.805719	0.653132	0.832394	0.951774	0.799324	0.534779	0.579812	0.691085	0.868358	0.343551	0.663757	0.97953	0.64639	0.646502	0.907911	0.104677	0.134213	0.531204	0.0770033	0.475338
314	462	0.161073	0.195596	0.413577	0.389227	0.382136	0.151147	0.219961	0.27296	0.268665	0.250919	0.281628	0.290762	0.241709	0.269951	0.20763	0.331021	0.283498	0.341776	0.133114	0.442663	0.303044	0.250482	0.216821	0.331321	0.20059	0.191002	0.106661	0.163127	0.160813	0.239515	0.162224	0.202748	0.176983	0.117961	0.174299	0.147254	0.209856	0.187958	0.18721	0.174365	0.125628	0.163409	0.216022	0.391788	0.4432	0.413734	0.280969	0.425688
315	463	0.427311	0.436442	0.0855882	0.143765	0.354294	0.304011	0.41792	0.495234	0.406081	0.30574	0.369263	0.539615	0.353787	0.534866	0.477027	0.657039	0.515508	0.433016	0.646034	0.667198	0.601819	0.37196	0.446316	0.674713	0.540366	0.252484	0.610916	0.790323	0.74228	0.56295	0.722687	0.873102	0.879818	0.567068	0.600374	0.728021	0.928578	0.334253	0.788585	0.929102	0.671174	0.775061	0.963728	0.104363	0.153376	0.50014	0.114853	0.451933
316	465	0.288357	0.394721	0.104487	0.227787	0.311574	0.221081	0.367492	0.555754	0.458916	0.449116	0.440091	0.63346	0.397968	0.504828	0.451049	0.689411	0.639215	0.533098	0.403308	0.741256	0.595574	0.490011	0.446448	0.706869	0.442112	0.307237	0.306335	0.493761	0.492459	0.57438	0.463025	0.687776	0.513225	0.286657	0.368775	0.391474	0.524495	0.328672	0.479654	0.560416	0.445264	0.484342	0.5966	0.165901	0.192354	0.428578	0.110791	0.370526
317	466	0.400032	0.510944	0.444531	0.370938	0.635762	0.277109	1.24109	1.42531	1.23717	1.29729	1.41325	1.35088	1.09572	1.44881	1.36796	1.54558	1.50839	1.19795	0.526859	1.30883	1.69782	1.14233	1.35792	1.84918	0.523847	0.273503	0.494119	0.582048	0.695697	0.473119	0.596922	0.717227	0.63508	0.414267	0.544834	0.588113	0.647096	0.330573	0.650551	0.724582	0.522356	0.544032	0.680448	0.491974	0.634056	0.756951	0.49714	0.753442
318	467	0.460324	0.516745	0.0800284	0.149762	0.360588	0.357537	0.382903	0.590405	0.440821	0.350559	0.454835	0.653518	0.393806	0.479805	0.405602	0.683892	0.593059	0.503482	0.64671	0.722358	0.614547	0.477708	0.584184	0.699717	0.605498	0.30037	0.549097	0.789839	0.78847	0.574318	0.825917	0.995184	0.852549	0.504903	0.552476	0.738776	0.827578	0.34829	0.73601	1.02138	0.714929	0.845191	0.960345	0.101549	0.130232	0.463529	0.113831	0.47003
319	468	0.823144	0.929338	0.214169	0.234692	0.402292	0.645222	0.764051	0.464544	0.786963	0.367836	0.476726	0.508539	0.691297	0.954453	0.793133	0.900202	0.593402	0.445073	0.602529	0.841455	0.665927	0.413787	0.480746	0.942015	0.743523	0.611535	1.15503	0.586812	0.712604	0.61327	0.619864	0.739102	1.36677	1.06724	1.03935	0.844528	0.937461	0.428603	0.870701	0.782759	0.763169	0.610846	0.79465	0.234407	0.282193	0.565536	0.247587	0.590698
320	469	0.410102	0.424116	0.126347	0.125354	0.273413	0.276256	0.773257	0.372047	0.811402	0.317285	0.33203	0.424013	0.764571	0.979473	0.955966	0.88994	0.404367	0.335763	0.560692	0.825829	0.496404	0.346823	0.393654	0.778601	0.486253	0.279159	1.36588	0.547203	0.625227	0.676286	0.527143	0.630661	1.09172	1.24768	0.5434	0.665159	0.752456	0.330588	0.666559	0.707144	0.603688	0.509069	0.656593	0.14566	0.208931	0.47104	0.138407	0.394463
321	47	0.425081	0.441116	0.229545	0.232079	0.454328	0.314688	1.25625	1.04178	1.26685	0.896671	0.97776	1.0952	1.12907	1.55192	1.42085	1.47155	1.15822	0.850131	0.533545	1.17647	1.26535	0.809958	0.972043	1.5619	0.523131	0.237534	0.990971	0.537922	0.596132	0.579439	0.543792	0.660474	0.912777	0.895775	0.535328	0.614631	0.664186	0.295168	0.680106	0.681902	0.544321	0.599151	0.716059	0.300213	0.395619	0.548996	0.305435	0.608392
322	470	0.712294	0.775912	0.144732	0.166295	0.334277	0.601752	0.678498	0.487106	0.747296	0.343454	0.427307	0.475407	0.632736	0.84652	0.689161	0.809481	0.486717	0.372322	0.608282	0.686453	0.578784	0.393795	0.437439	0.822314	0.73777	0.509705	1.0708	0.642639	0.651087	0.624441	0.606011	0.721979	1.01775	0.983404	0.884929	0.742175	0.808998	0.372859	0.766894	0.772307	0.747119	0.547117	0.769672	0.170236	0.214686	0.498804	0.122249	0.549543
323	48	0.39486	0.435292	0.221513	0.255253	0.372888	0.287051	1.0778	1.03167	0.961662	0.833999	0.947874	1.01215	0.925208	1.20275	1.09479	1.30622	1.07846	0.849326	0.518981	1.01543	1.22557	0.861349	0.986789	1.35777	0.447614	0.237537	0.588534	0.546185	0.583547	0.514482	0.51027	0.652093	0.670326	0.595224	0.508964	0.568341	0.609899	0.242045	0.617565	0.655154	0.53759	0.540824	0.65244	0.254625	0.405874	0.527132	0.306755	0.593466
324	480	0.577919	0.589901	0.117854	0.187569	0.379841	0.401302	1.11568	0.511941	1.09168	0.355368	0.455677	0.559978	1.0265	1.2797	1.22682	1.29803	0.510426	0.386592	0.667795	1.12769	0.614561	0.388959	0.494853	1.17006	0.656558	0.358101	1.73006	0.683264	0.775753	0.88339	0.668526	0.871004	1.48326	1.63065	0.644203	0.857312	0.964185	0.420959	0.829009	0.909302	0.802599	0.72497	0.853043	0.159487	0.206009	0.608925	0.142697	0.566901
325	481	0.359071	0.362347	0.128608	0.114072	0.271083	0.260526	0.697065	0.305629	0.747352	0.236049	0.302007	0.319498	0.620986	0.776538	0.740314	0.738503	0.275698	0.249826	0.464715	0.66224	0.390235	0.264089	0.319962	0.651156	0.346887	0.189587	1.24967	0.503986	0.492478	0.508079	0.441439	0.530436	1.03316	1.17982	0.435451	0.556064	0.603241	0.220498	0.531818	0.572436	0.49926	0.483739	0.572256	0.125827	0.134197	0.349607	0.11664	0.308471
326	482	0.362596	0.35296	0.103037	0.116541	0.253742	0.272508	0.714454	0.362259	0.819514	0.259725	0.292103	0.355642	0.671225	0.885306	0.817293	0.766195	0.331613	0.236893	0.487864	0.699109	0.42304	0.250384	0.305969	0.637721	0.390355	0.215068	1.29594	0.446427	0.505365	0.512178	0.450711	0.517114	1.16381	1.13215	0.455301	0.591079	0.571786	0.281064	0.54761	0.580055	0.501048	0.469179	0.595419	0.126069	0.159369	0.34747	0.119757	0.28397
327	483	0.225738	0.161509	0.865106	0.480818	0.703873	0.162519	0.464261	0.455774	0.432674	0.609444	0.630623	0.437622	0.418112	0.592144	0.50904	0.485514	0.483515	0.380322	0.123296	0.326599	0.513215	0.394705	0.476974	0.546148	0.159636	0.127673	0.170321	0.165651	0.163469	0.100499	0.159424	0.175	0.1762	0.18078	0.255165	0.206664	0.222011	0.122729	0.259254	0.147505	0.222947	0.137396	0.177289	0.951083	1.17963	0.670736	0.973626	0.770137
328	484	0.307977	0.395933	0.297743	0.279994	0.417728	0.350162	0.958194	0.949935	0.931219	0.87014	0.96781	1.04469	0.862956	1.0377	1.03953	1.22006	1.05528	0.832797	0.328825	0.959758	1.07985	0.758348	0.865063	1.26052	0.367998	0.178636	0.336444	0.413163	0.450881	0.428208	0.432017	0.552905	0.470869	0.319742	0.372291	0.462285	0.512637	0.193659	0.42865	0.474067	0.441198	0.342942	0.429639	0.314322	0.516667	0.502329	0.385234	0.577689
329	485	0.433753	0.500287	0.0725387	0.17908	0.38931	0.349194	0.427125	0.650804	0.424994	0.449595	0.483955	0.704476	0.384034	0.558122	0.494694	0.765435	0.785269	0.565602	0.743454	0.882757	0.735033	0.493819	0.542943	0.83329	0.699833	0.297557	0.588907	0.828457	0.900611	0.653876	0.895761	1.0141	0.878109	0.513013	0.62659	0.710556	0.929991	0.37862	0.828979	1.01363	0.696688	0.715224	0.991301	0.12459	0.181734	0.578818	0.0921631	0.538868
330	486	0.225418	0.176254	0.937134	0.520631	0.745577	0.196368	0.485807	0.505755	0.4602	0.705194	0.687122	0.517184	0.456767	0.64348	0.534259	0.535478	0.545024	0.419631	0.124962	0.379786	0.575061	0.445481	0.491083	0.616251	0.15303	0.172902	0.176171	0.105485	0.144108	0.0970028	0.132914	0.151893	0.162761	0.194145	0.276427	0.183716	0.188764	0.140164	0.241362	0.128395	0.203176	0.105024	0.170622	1.04628	1.31191	0.753972	1.05727	0.816752
331	487	0.485204	0.558405	0.0731132	0.161542	0.388727	0.353796	0.461305	0.537651	0.446475	0.341169	0.451796	0.57101	0.442278	0.525293	0.463629	0.693163	0.518056	0.420712	0.694207	0.690481	0.599833	0.449511	0.472335	0.721454	0.635487	0.276761	0.620698	0.746626	0.782581	0.511143	0.693409	0.912845	0.742421	0.599656	0.6365	0.876653	1.01763	0.415417	0.905172	1.0273	0.802969	0.763943	0.971878	0.100129	0.162874	0.522152	0.114328	0.514651
332	488	0.476857	0.566865	0.0478132	0.168442	0.387203	0.363868	0.451248	0.563735	0.46427	0.343061	0.472088	0.61711	0.446011	0.529024	0.485079	0.723972	0.528012	0.427394	0.722717	0.738686	0.619558	0.456168	0.475786	0.756009	0.674611	0.299131	0.625681	0.760986	0.780184	0.527843	0.700904	0.945155	0.780736	0.613005	0.626841	0.900113	1.02467	0.461517	0.922817	1.06102	0.770109	0.751685	1.01361	0.0852475	0.160418	0.548675	0.109325	0.509325
333	489	0.449892	0.43179	0.142264	0.186725	0.346318	0.323436	0.391535	0.355317	0.373997	0.29755	0.352588	0.457368	0.307816	0.475732	0.453622	0.506464	0.387425	0.30134	0.732221	0.502526	0.46865	0.344466	0.4784	0.536269	0.51734	0.232435	0.580464	0.57819	0.737603	0.45507	0.600096	0.677213	0.701193	0.539801	0.586814	0.762742	0.777985	0.328453	0.791254	0.726941	0.740524	0.624757	0.765487	0.127122	0.185304	0.441524	0.135433	0.460372
334	490	0.48279	0.482645	0.101894	0.210073	0.333191	0.391151	0.467496	0.445573	0.454154	0.352523	0.394944	0.455102	0.392904	0.542212	0.485302	0.608037	0.451587	0.381601	0.702556	0.590904	0.483262	0.354556	0.420019	0.631621	0.561744	0.280818	0.626162	0.56586	0.810527	0.477599	0.598489	0.748499	0.729238	0.652364	0.632727	0.850753	0.839812	0.384776	0.816776	0.846625	0.746948	0.686729	0.799257	0.141643	0.168202	0.526526	0.154766	0.494315
335	491	0.504503	0.522458	0.109696	0.227745	0.43725	0.399857	0.475879	0.489029	0.557633	0.349293	0.434072	0.556654	0.435931	0.621888	0.554645	0.727022	0.559358	0.403657	0.771311	0.749181	0.580522	0.403439	0.475353	0.705993	0.605315	0.297345	0.724394	0.664919	0.89344	0.619739	0.669701	0.811341	0.81582	0.669836	0.642248	0.830509	0.905032	0.451474	0.884075	0.997772	0.842458	0.709255	0.974747	0.165073	0.195526	0.560677	0.13946	0.563941
336	492	0.438175	0.412792	0.0965979	0.235304	0.38338	0.295416	0.416503	0.425168	0.386609	0.277059	0.390937	0.424816	0.36241	0.497676	0.405231	0.58726	0.473082	0.350484	0.692471	0.606312	0.514499	0.346033	0.429059	0.582362	0.469137	0.249501	0.581934	0.531326	0.803253	0.511246	0.594588	0.718091	0.671515	0.53053	0.529426	0.742705	0.829497	0.370442	0.791059	0.759269	0.678688	0.625631	0.821105	0.158796	0.145878	0.496562	0.12419	0.455756
337	493	0.822348	0.893823	0.16169	0.204209	0.380286	0.710294	0.359939	0.47484	0.417421	0.40632	0.470608	0.491498	0.380349	0.498216	0.447488	0.586215	0.532766	0.346198	0.59545	0.550709	0.575418	0.40416	0.520992	0.607786	0.940617	0.583901	0.572004	0.662825	0.644024	0.46685	0.648084	0.732625	0.704733	0.491158	1.01265	0.704451	0.744437	0.34363	0.718837	0.754189	0.624017	0.565897	0.693238	0.217424	0.285375	0.520362	0.190013	0.508968
338	494	0.399966	0.328324	0.722905	0.547656	0.81553	0.268259	0.903378	0.56136	0.918534	0.567015	0.574935	0.517514	0.71697	1.07529	0.935264	0.899218	0.593524	0.475698	0.383331	0.768662	0.70771	0.453838	0.579849	0.976056	0.378637	0.246589	0.998095	0.37791	0.435166	0.436393	0.377786	0.466902	0.765103	0.846108	0.481138	0.530783	0.577812	0.248656	0.613195	0.52599	0.474309	0.375485	0.495488	0.701511	0.877172	0.794405	0.675876	0.841864
339	495	0.418601	0.45013	0.673945	0.523876	0.798346	0.290687	0.565195	0.688349	0.612554	0.579001	0.656866	0.627836	0.522235	0.730379	0.59925	0.750143	0.704942	0.543221	0.462538	0.639903	0.84759	0.532137	0.622687	0.880986	0.474285	0.249093	0.479023	0.531951	0.544508	0.382456	0.511801	0.597636	0.602258	0.401856	0.58782	0.58966	0.715417	0.274289	0.662223	0.619732	0.530469	0.518777	0.620845	0.673263	0.923637	0.812101	0.676318	0.931773
340	496	0.371658	0.347595	0.615285	0.419699	0.784119	0.232029	0.494968	0.578019	0.453006	0.472049	0.561461	0.55799	0.41908	0.650733	0.532686	0.706236	0.617373	0.45157	0.416381	0.551708	0.708837	0.514242	0.593105	0.79029	0.382098	0.200739	0.432464	0.493086	0.496472	0.395233	0.505616	0.523184	0.555535	0.379367	0.455828	0.490196	0.596279	0.227584	0.518093	0.556645	0.483342	0.413367	0.472012	0.602693	0.769706	0.759051	0.607849	0.809247
341	497	0.412573	0.427896	0.34392	0.273407	0.608164	0.327391	0.513425	0.639524	0.504381	0.477338	0.582817	0.656512	0.407779	0.631676	0.539053	0.733614	0.698465	0.512781	0.582728	0.690914	0.71768	0.485139	0.59631	0.793293	0.530771	0.232277	0.591205	0.748184	0.660953	0.510058	0.69515	0.829181	0.772435	0.517269	0.530786	0.640186	0.852488	0.323748	0.738302	0.799583	0.671196	0.61483	0.740916	0.387331	0.478056	0.739304	0.350088	0.725235
342	498	0.386168	0.374424	0.587337	0.497943	0.754121	0.27259	0.54472	0.601678	0.557576	0.519993	0.619972	0.57988	0.465643	0.674625	0.57474	0.681213	0.689645	0.556972	0.41718	0.704577	0.733191	0.514645	0.609025	0.830788	0.456228	0.269826	0.414173	0.477187	0.476246	0.4014	0.466835	0.547444	0.550872	0.421087	0.471745	0.627957	0.66236	0.297492	0.549946	0.606303	0.536161	0.434254	0.602939	0.642283	0.805132	0.896993	0.614089	0.866594
343	499	0.407016	0.403719	0.110726	0.151848	0.290314	0.323221	0.744951	0.362967	0.747171	0.270864	0.332528	0.367193	0.695101	0.930715	0.847308	0.811383	0.351413	0.31887	0.529386	0.748791	0.470903	0.330045	0.391402	0.789243	0.413217	0.274166	1.27893	0.553196	0.567531	0.572484	0.509025	0.60094	1.01144	1.1643	0.499286	0.658569	0.647248	0.261646	0.618134	0.634031	0.508206	0.518582	0.654153	0.135874	0.152745	0.406675	0.111686	0.405949
344	5	0.374702	0.43528	0.0619325	0.219115	0.281417	0.264428	0.263546	0.436305	0.332919	0.248363	0.296514	0.444941	0.313496	0.407325	0.361034	0.58982	0.522202	0.334688	0.597145	0.64504	0.500854	0.360949	0.362349	0.589898	0.477975	0.276073	0.436435	0.672629	0.689282	0.533002	0.637303	0.795158	0.633916	0.42628	0.441663	0.633321	0.742938	0.351602	0.614783	0.77617	0.598902	0.483554	0.779758	0.0817921	0.126393	0.426596	0.099106	0.398892
345	500	0.38787	0.421488	0.0833823	0.146206	0.318105	0.282693	0.391082	0.50569	0.397633	0.336624	0.412468	0.511982	0.375952	0.52789	0.425159	0.664375	0.494868	0.411349	0.70559	0.766028	0.654133	0.4183	0.469215	0.699213	0.606616	0.293942	0.623159	0.740378	0.750892	0.576565	0.723788	0.912681	0.84184	0.565489	0.592872	0.725653	0.918713	0.37287	0.766986	1.03555	0.657963	0.79547	0.961846	0.102219	0.151116	0.516244	0.119955	0.476915
346	502	0.404613	0.454487	0.069899	0.1748	0.336279	0.319597	0.391251	0.615081	0.392832	0.339593	0.43895	0.566959	0.357588	0.435697	0.375925	0.731124	0.60544	0.432479	0.569907	0.691121	0.622343	0.395204	0.508206	0.718816	0.57095	0.245356	0.54723	0.751572	0.686657	0.546942	0.737131	0.871316	0.687715	0.513006	0.476051	0.608971	0.782861	0.306106	0.649882	0.883444	0.602356	0.635554	0.759465	0.0972083	0.129978	0.49887	0.076806	0.439891
347	503	0.265266	0.291832	0.10166	0.130837	0.18888	0.18424	0.414691	0.201501	0.487397	0.181402	0.209905	0.233716	0.471684	0.588182	0.491581	0.490712	0.196321	0.212531	0.283658	0.380813	0.252511	0.176494	0.211371	0.427441	0.266831	0.189448	0.82926	0.314983	0.318962	0.398594	0.311809	0.316724	0.555686	0.758953	0.297889	0.33511	0.405346	0.208536	0.333052	0.354069	0.279801	0.264122	0.356014	0.0880815	0.0754816	0.237616	0.111198	0.200257
348	504	0.434616	0.409594	0.0602764	0.128633	0.32638	0.281615	0.367569	0.413298	0.378376	0.238312	0.356059	0.458037	0.337836	0.441251	0.439516	0.576795	0.426939	0.378766	0.602147	0.647158	0.499162	0.309805	0.411479	0.584787	0.494117	0.221996	0.570696	0.738488	0.633259	0.464416	0.731177	0.759843	0.730468	0.519034	0.474079	0.698458	0.799775	0.335584	0.709145	0.969081	0.656692	0.74845	0.863797	0.0878025	0.120716	0.420895	0.0925303	0.430247
349	505	0.371354	0.402845	0.146398	0.12544	0.288967	0.267579	0.76554	0.41456	0.790993	0.316254	0.359286	0.424304	0.671936	0.965427	0.886086	0.840318	0.445617	0.30892	0.534537	0.697035	0.499509	0.310007	0.363504	0.73195	0.476539	0.238008	1.16241	0.502466	0.533015	0.553453	0.507491	0.621308	0.950453	1.15691	0.513975	0.60218	0.69572	0.324925	0.682915	0.665251	0.607533	0.565512	0.64141	0.13176	0.183627	0.408273	0.121337	0.402412
350	506	0.144665	0.179358	0.052876	0.156936	0.0608493	0.152316	0.274089	0.128326	0.242315	0.0909053	0.0866462	0.106764	0.278341	0.275198	0.251453	0.329282	0.0835444	0.110457	0.199958	0.187846	0.06099	0.089245	0.0501148	0.222488	0.149818	0.185612	0.456139	0.174717	0.165875	0.37123	0.142635	0.163671	0.316903	0.412383	0.157817	0.172254	0.186545	0.176037	0.156638	0.142813	0.138592	0.140626	0.171213	0.06109	0.0297336	0.113903	0.0268947	0.112715
351	507	0.265443	0.316306	0.100335	0.133892	0.246269	0.237259	0.17138	0.222746	0.234755	0.157443	0.176005	0.297001	0.219965	0.260401	0.211992	0.361326	0.260137	0.273907	0.378193	0.330127	0.265051	0.242913	0.295417	0.286882	0.374196	0.208349	0.36096	0.532598	0.353462	0.475185	0.486264	0.514853	0.418728	0.319039	0.388697	0.581314	0.570137	0.406064	0.554244	0.421275	0.441437	0.373414	0.44637	0.147743	0.144315	0.330606	0.127722	0.347829
352	508	0.438378	0.502398	0.111174	0.184221	0.291471	0.322824	0.327729	0.458085	0.376483	0.290422	0.341177	0.410697	0.336509	0.439784	0.331604	0.58956	0.441884	0.362108	0.546242	0.637106	0.463499	0.332009	0.380016	0.553211	0.609071	0.326208	0.490104	0.70919	0.664309	0.68858	0.701525	0.928913	0.763367	0.457253	0.497988	0.819685	0.930396	0.544763	0.867086	0.778	0.797093	0.522554	0.725972	0.137599	0.164133	0.499373	0.0999692	0.529956
353	509	0.487826	0.516457	0.0826677	0.173515	0.363515	0.335281	0.430759	0.515066	0.416343	0.310791	0.40303	0.494952	0.438705	0.612173	0.507189	0.707727	0.557899	0.392814	0.673892	0.700773	0.647293	0.399408	0.481953	0.825971	0.654315	0.262821	0.712839	0.799513	0.740467	0.595659	0.742996	0.897162	0.834591	0.646466	0.593323	0.835592	0.964403	0.369247	0.884951	0.948339	0.759451	0.711398	0.958061	0.117704	0.157804	0.56005	0.0915767	0.442063
354	51	0.363679	0.389669	0.0318083	0.19506	0.171703	0.285755	0.237446	0.355263	0.313397	0.218668	0.262644	0.36356	0.28771	0.30908	0.247284	0.497025	0.496028	0.362412	0.446863	0.57255	0.386323	0.323833	0.292744	0.54041	0.469362	0.270812	0.413427	0.497402	0.542407	0.551206	0.489745	0.654243	0.566413	0.366731	0.405228	0.555946	0.575172	0.32336	0.499023	0.688827	0.488221	0.510126	0.64903	0.0786387	0.0549199	0.372411	0.0564217	0.378585
355	510	0.34105	0.373967	0.0663439	0.177331	0.261844	0.292583	0.338312	0.408552	0.340526	0.258034	0.32764	0.420164	0.327588	0.417978	0.367552	0.566566	0.416892	0.287008	0.551243	0.489079	0.455148	0.318843	0.420549	0.580441	0.510589	0.217323	0.472268	0.6235	0.557607	0.475662	0.59855	0.743226	0.61256	0.449075	0.439758	0.557304	0.632589	0.275487	0.613989	0.683183	0.570001	0.561466	0.678114	0.0871764	0.120413	0.343453	0.105511	0.382311
356	511	0.366599	0.302969	0.459694	0.277224	0.50975	0.2275	0.480414	0.452456	0.43855	0.444552	0.523429	0.474864	0.392878	0.54843	0.497524	0.534995	0.463368	0.370832	0.388833	0.50392	0.536129	0.407346	0.48128	0.646678	0.32767	0.172112	0.331449	0.432229	0.369384	0.294257	0.444765	0.460239	0.419326	0.361537	0.419872	0.459783	0.519137	0.242719	0.516095	0.448765	0.497712	0.454692	0.464624	0.626679	0.772071	0.767194	0.690355	0.828185
357	512	0.481383	0.587301	0.117614	0.219164	0.392764	0.398863	0.477726	0.532178	0.469474	0.334719	0.426939	0.510773	0.409841	0.571672	0.531909	0.707907	0.550283	0.446744	0.671901	0.744174	0.619683	0.411213	0.519189	0.70337	0.637671	0.345754	0.689739	0.752171	0.819386	0.647627	0.766289	0.891067	0.883514	0.625833	0.625088	0.998803	1.10281	0.499992	0.977297	0.979037	0.930652	0.810387	0.968816	0.172761	0.219095	0.663284	0.15701	0.620411
358	513	0.0783965	0.0967269	0.0655501	0.0887391	0.0305992	0.0808355	-0.00477355	0.00301402	-0.00204666	0.0174574	0.0281626	0.011625	0.00662652	-0.0106015	-0.00801206	0.0415378	0.0334696	-0.00969886	0.107757	0.0637898	-0.025729	0.0356654	-0.0129459	0.00751297	0.0924938	0.093517	0.0533127	0.132744	0.0823507	0.146169	0.14402	0.110441	0.0815503	0.0647839	0.0857402	0.102902	0.0802019	0.113647	0.0847549	0.0999033	0.142304	0.0374439	0.11271	0.0524322	0.0597143	0.0958482	0.0488169	0.0304852
359	514	0.30965	0.298231	0.0863811	0.130124	0.198766	0.239942	0.598713	0.306917	0.643374	0.244172	0.282589	0.308662	0.552654	0.699637	0.644848	0.649144	0.315642	0.202766	0.341573	0.506262	0.296887	0.192941	0.273173	0.538201	0.334015	0.154381	0.824345	0.366495	0.405621	0.421088	0.356382	0.409522	0.719078	0.844647	0.393177	0.41521	0.44857	0.220896	0.43805	0.440197	0.378534	0.41217	0.478638	0.121991	0.112869	0.315165	0.110956	0.241619
360	515	0.45947	0.570471	0.0644288	0.201803	0.41756	0.41053	0.533403	0.522432	0.470456	0.377024	0.447337	0.538038	0.430058	0.638294	0.52988	0.738371	0.612736	0.452076	0.745025	0.768203	0.638051	0.432357	0.487861	0.750264	0.667437	0.309836	0.733246	0.778086	0.805646	0.6153	0.713202	0.946518	0.85441	0.675008	0.682473	0.933685	1.17622	0.44674	1.02316	1.06722	0.821693	0.864904	1.02045	0.157732	0.221229	0.589509	0.123591	0.578684
361	516	0.477499	0.450134	0.108979	0.13531	0.353461	0.359214	0.449161	0.489326	0.417915	0.343486	0.460629	0.500895	0.372819	0.512239	0.449426	0.643448	0.574001	0.398487	0.690205	0.705641	0.564359	0.425717	0.505275	0.680087	0.655003	0.27695	0.63717	0.816139	0.756125	0.525133	0.785472	0.84832	0.789421	0.580345	0.626459	0.855124	1.08136	0.39993	0.877523	0.890353	0.788943	0.785914	0.914032	0.129826	0.173126	0.536917	0.152682	0.561056
362	517	0.392549	0.554054	0.0847968	0.158072	0.317015	0.357561	0.439668	0.461021	0.443338	0.324196	0.355119	0.476013	0.371251	0.488913	0.419101	0.614329	0.517115	0.371878	0.631585	0.645807	0.531572	0.389038	0.43734	0.648837	0.557844	0.35105	0.599412	0.706752	0.716972	0.542308	0.643783	0.835848	0.777285	0.579586	0.590599	0.830475	0.985022	0.396603	0.83255	0.858494	0.713847	0.74078	0.887554	0.136764	0.177052	0.491427	0.12845	0.493089
363	518	0.269299	0.287272	0.0324413	0.16162	0.129996	0.192567	0.175231	0.223523	0.169398	0.139051	0.145364	0.298042	0.191872	0.186031	0.156038	0.356014	0.263197	0.20554	0.368944	0.409134	0.230149	0.197372	0.181181	0.281245	0.413162	0.207125	0.281472	0.368914	0.423972	0.430827	0.34589	0.436959	0.363502	0.236873	0.244884	0.329271	0.448546	0.328	0.385755	0.457788	0.296878	0.304078	0.434081	0.0810905	0.0471405	0.241203	0.0698256	0.249575
364	519	0.347833	0.453027	0.0711226	0.14432	0.322851	0.285081	0.373642	0.426343	0.370921	0.277518	0.353011	0.429687	0.325315	0.450787	0.35781	0.545089	0.439278	0.284952	0.58641	0.555037	0.504396	0.36011	0.438126	0.58404	0.510669	0.239395	0.596883	0.696796	0.612499	0.478568	0.635617	0.737079	0.678702	0.51937	0.554559	0.671681	0.927039	0.296526	0.745603	0.810729	0.664797	0.720175	0.738496	0.0982808	0.131346	0.426272	0.106375	0.435846
365	520	0.489033	0.501123	0.0980948	0.186744	0.350271	0.371611	0.433968	0.577156	0.411857	0.357847	0.439255	0.628585	0.403774	0.552628	0.467385	0.740733	0.657677	0.418361	0.769099	0.740805	0.680921	0.405886	0.504557	0.802838	0.706914	0.268218	0.698481	0.787838	0.868886	0.619086	0.720329	0.955459	0.853654	0.593036	0.629316	0.791439	1.01403	0.4564	0.913504	1.06324	0.751246	0.773945	1.05058	0.137657	0.150805	0.514886	0.11852	0.566262
366	521	0.471634	0.491854	0.100638	0.163727	0.385549	0.373828	0.439037	0.53032	0.495716	0.356974	0.471826	0.571117	0.474749	0.554482	0.525409	0.734821	0.584901	0.451904	0.674359	0.67603	0.641391	0.42056	0.496959	0.759452	0.676635	0.317891	0.654299	0.79811	0.718751	0.595772	0.706995	0.93875	0.846773	0.591585	0.609211	0.837319	1.01028	0.432532	0.913578	0.933729	0.769392	0.804943	0.983585	0.14604	0.205558	0.59363	0.170253	0.570931
367	523	0.312431	0.377798	0.0548054	0.165206	0.274771	0.285125	0.3343	0.338183	0.306076	0.227105	0.281269	0.367154	0.306892	0.354857	0.298815	0.520701	0.37397	0.263022	0.52387	0.482666	0.418611	0.278258	0.358623	0.499285	0.470124	0.229236	0.50253	0.61055	0.53077	0.455163	0.636697	0.684564	0.625041	0.426659	0.455906	0.571242	0.687128	0.268435	0.693408	0.660855	0.577997	0.586737	0.722927	0.0979841	0.0992328	0.417147	0.131863	0.397288
368	527	0.534002	0.509581	0.0637115	0.221627	0.404086	0.432098	0.530288	0.556948	0.469198	0.389318	0.451029	0.587546	0.443013	0.596129	0.462772	0.73201	0.553251	0.433713	0.713608	0.71254	0.623504	0.454553	0.483599	0.730672	0.624529	0.314461	0.714098	0.790041	0.78209	0.533485	0.746658	0.912246	0.86631	0.620758	0.619293	0.831951	1.01683	0.411092	0.896078	0.996756	0.795153	0.868515	1.02069	0.127104	0.171609	0.581534	0.153708	0.561406
369	540	0.281737	0.307838	0.113594	0.157179	0.204701	0.251115	0.593537	0.271467	0.675185	0.198646	0.217548	0.280457	0.61273	0.7805	0.676736	0.661913	0.256194	0.266567	0.346036	0.649653	0.3107	0.212267	0.237522	0.50651	0.330558	0.213101	1.02499	0.332612	0.369768	0.491943	0.357586	0.404196	1.01222	0.970829	0.330074	0.446768	0.48133	0.264766	0.43161	0.436222	0.383242	0.358745	0.438077	0.149852	0.147997	0.287008	0.0969695	0.242523
370	541	0.316857	0.34123	0.103032	0.133376	0.20661	0.255974	0.568722	0.306475	0.609284	0.217568	0.226793	0.252309	0.617594	0.657299	0.666904	0.648005	0.295335	0.298517	0.320063	0.540244	0.300647	0.241126	0.259631	0.512762	0.40911	0.276551	0.948831	0.390203	0.424595	0.544533	0.376695	0.443835	0.770319	0.93718	0.380084	0.419742	0.490843	0.280014	0.471554	0.478149	0.38796	0.384863	0.473363	0.113399	0.142772	0.336581	0.102852	0.275459
371	542	0.28432	0.251122	0.0784947	0.109742	0.150956	0.193304	0.496537	0.186975	0.528627	0.141397	0.165275	0.248669	0.483049	0.60119	0.489876	0.517302	0.20672	0.173271	0.283009	0.472616	0.195259	0.170406	0.144097	0.374645	0.223849	0.197296	0.801783	0.227855	0.336034	0.482832	0.254153	0.319851	0.739171	0.766583	0.281405	0.379952	0.361752	0.242557	0.325715	0.333415	0.292721	0.248286	0.311977	0.110475	0.0956321	0.250378	0.0627692	0.198703
372	543	0.41278	0.401936	0.111797	0.157691	0.308345	0.324829	0.75094	0.366913	0.738008	0.259399	0.293145	0.396171	0.702195	0.831135	0.825252	0.814854	0.38348	0.292127	0.45447	0.755615	0.419915	0.268844	0.359735	0.803857	0.408113	0.273504	1.20793	0.48512	0.540597	0.592205	0.434906	0.597919	0.917864	1.126	0.460639	0.585522	0.649655	0.245564	0.566993	0.605645	0.540206	0.472303	0.555342	0.134826	0.160837	0.392804	0.140344	0.35838
373	544	0.303473	0.364654	0.0402317	0.173774	0.215787	0.195492	0.235834	0.362789	0.222994	0.218874	0.302091	0.36824	0.225128	0.272663	0.217295	0.435371	0.376023	0.383661	0.369925	0.490285	0.369278	0.239346	0.271884	0.412027	0.436001	0.248466	0.327514	0.494313	0.468898	0.5188	0.490981	0.619522	0.445321	0.307221	0.29762	0.412594	0.519835	0.302275	0.445178	0.548497	0.378308	0.399758	0.525051	0.0479929	0.089676	0.355806	0.0714132	0.264728
374	545	0.265387	0.290656	0.0457181	0.168367	0.177515	0.211354	0.185266	0.358471	0.222718	0.187025	0.224811	0.361983	0.207175	0.225006	0.205323	0.444067	0.365947	0.333608	0.326162	0.505904	0.294507	0.219998	0.318279	0.377933	0.389312	0.220233	0.312104	0.450665	0.411121	0.451	0.423082	0.506514	0.383237	0.281307	0.267792	0.384445	0.471182	0.264131	0.3707	0.517082	0.352391	0.352794	0.48485	0.0590779	0.047752	0.301742	0.013674	0.247853
375	60	0.273316	0.355158	0.0294168	0.166241	0.20937	0.220759	0.209046	0.340228	0.216605	0.188486	0.275076	0.38681	0.231224	0.267879	0.215867	0.46032	0.462328	0.34021	0.3691	0.612151	0.372146	0.333088	0.251374	0.417308	0.426093	0.221878	0.335445	0.490228	0.494192	0.490448	0.482149	0.636998	0.496406	0.316755	0.341671	0.462351	0.571157	0.289457	0.395104	0.577805	0.41954	0.40633	0.56262	0.0481485	0.0701762	0.353409	0.011833	0.27865
376	61	0.315683	0.391633	0.0515531	0.155171	0.237537	0.222081	0.251804	0.415992	0.252897	0.253287	0.30722	0.43168	0.26829	0.315455	0.278486	0.601328	0.532362	0.39155	0.558396	0.582621	0.493592	0.380743	0.35214	0.493707	0.505473	0.251488	0.403086	0.590685	0.637952	0.551775	0.611167	0.752676	0.617419	0.370251	0.436918	0.544925	0.621095	0.318612	0.522598	0.684801	0.511723	0.508018	0.669794	0.0624314	0.0647266	0.367271	0.0295746	0.372865
377	62	0.453901	0.54581	0.0714525	0.18626	0.319163	0.359078	0.671796	0.551973	0.748345	0.316624	0.419942	0.563955	0.610953	0.888271	0.77701	0.969329	0.754481	0.433342	0.706596	0.926991	0.65067	0.435717	0.451051	0.849966	0.631317	0.299554	1.10468	0.741109	0.809949	0.741429	0.727054	0.903382	1.04376	1.00162	0.586922	0.802926	0.970005	0.357813	0.814975	0.950809	0.726263	0.668698	0.904887	0.0972514	0.1298	0.537947	0.0772531	0.515703
378	63	0.371953	0.418255	0.0568692	0.125657	0.307128	0.260591	0.329583	0.567219	0.332887	0.302536	0.427461	0.497536	0.352874	0.410666	0.386398	0.641572	0.645927	0.379639	0.722118	0.678973	0.629034	0.439001	0.529475	0.683942	0.632071	0.271125	0.597052	0.828931	0.773905	0.588085	0.8316	0.92419	0.727442	0.457599	0.552688	0.712441	0.77751	0.284963	0.743828	0.841671	0.639967	0.705533	0.8078	0.0893804	0.122398	0.420521	0.0768911	0.436047
379	64	0.385444	0.436317	0.0828757	0.16762	0.354163	0.281062	0.288914	0.557573	0.357064	0.310647	0.409858	0.544386	0.362463	0.464479	0.413464	0.651019	0.665355	0.40864	0.754666	0.638652	0.653849	0.479583	0.506417	0.689044	0.594348	0.226294	0.51292	0.75651	0.712639	0.540724	0.749922	0.884884	0.730629	0.443273	0.538822	0.747168	0.844187	0.291713	0.686326	0.85905	0.671841	0.649005	0.806701	0.0839085	0.0987153	0.454167	0.0752593	0.43125
380	65	0.413966	0.501664	0.0457247	0.153195	0.323662	0.29221	0.347731	0.627772	0.398654	0.304908	0.409318	0.5563	0.370977	0.473989	0.360815	0.718338	0.776773	0.470922	0.795987	0.721295	0.691406	0.457616	0.500577	0.754528	0.707224	0.225022	0.566237	0.88168	0.852994	0.654876	0.870402	0.986929	0.867301	0.52901	0.601568	0.774408	0.886995	0.352822	0.805199	0.984534	0.728005	0.690886	0.824402	0.100132	0.0976986	0.492283	0.0675815	0.452924
381	67	0.92111	0.966833	0.180598	0.138485	0.337112	0.711861	0.402455	0.394105	0.365998	0.320602	0.454202	0.445961	0.370723	0.483165	0.427995	0.584548	0.467531	0.355498	0.584724	0.591175	0.531201	0.414425	0.442771	0.65541	0.69707	0.724429	0.522014	0.58829	0.628293	0.436532	0.57345	0.695209	0.608343	0.490825	0.957103	0.668476	0.729214	0.34853	0.725377	0.739152	0.696521	0.5419	0.727103	0.191331	0.250384	0.485338	0.220593	0.563433
382	68	0.324936	0.372938	0.632607	0.415224	0.6689	0.262385	0.632799	0.660985	0.617096	0.6133	0.750219	0.674471	0.553235	0.708929	0.628187	0.817791	0.727734	0.554359	0.352108	0.638182	0.705044	0.525796	0.590257	0.891335	0.420191	0.233028	0.324886	0.423408	0.453306	0.325537	0.433188	0.552061	0.4709	0.35454	0.492924	0.437985	0.534834	0.221373	0.52919	0.487409	0.47591	0.420329	0.543014	0.512917	0.661414	0.645937	0.580892	0.671324
383	69	0.367455	0.37166	0.511564	0.349508	0.605883	0.257438	0.535994	0.554434	0.607394	0.559501	0.617215	0.608605	0.52904	0.671244	0.56225	0.748083	0.723525	0.547398	0.477351	0.691725	0.666966	0.505944	0.558885	0.786378	0.433982	0.285406	0.455822	0.531709	0.54801	0.412644	0.456231	0.647666	0.562462	0.450035	0.528669	0.56152	0.602394	0.290127	0.608046	0.626205	0.539298	0.455027	0.658293	0.456505	0.604298	0.710447	0.460051	0.625327
384	70	0.460182	0.43904	0.0881035	0.193626	0.31823	0.288348	0.621459	0.383986	0.645402	0.265607	0.367936	0.376326	0.513159	0.763172	0.682449	0.828032	0.448394	0.382767	0.608422	0.749396	0.517568	0.344041	0.432653	0.710497	0.53557	0.26057	0.91766	0.637087	0.666725	0.620321	0.636987	0.686232	0.922885	0.859256	0.527687	0.671502	0.778285	0.360516	0.726814	0.85996	0.567954	0.804087	1.11842	0.110465	0.152239	0.465586	0.0783811	0.406118
385	71	0.493681	0.464372	0.0879757	0.185698	0.348497	0.324204	0.636446	0.4283	0.641163	0.333983	0.389857	0.462611	0.614627	0.79843	0.701585	0.803589	0.544877	0.379715	0.626284	0.730316	0.522572	0.371391	0.419755	0.718643	0.515147	0.271745	1.0665	0.730196	0.69729	0.605425	0.627875	0.715722	1.00153	1.01197	0.616775	0.695484	0.836252	0.343887	0.715186	0.889618	0.632087	0.79833	1.10728	0.114507	0.144435	0.435916	0.112453	0.427658
386	72	0.491241	0.407406	0.111386	0.133835	0.312448	0.257248	0.4894	0.38345	0.526776	0.269873	0.354343	0.405634	0.527419	0.665252	0.565251	0.673157	0.48582	0.31903	0.597622	0.619109	0.508349	0.302087	0.405732	0.612746	0.474247	0.234589	0.893973	0.637623	0.625238	0.54482	0.571188	0.643359	0.857271	0.838797	0.536667	0.636489	0.690315	0.305876	0.683704	0.824531	0.571843	0.751467	1.015	0.116117	0.156015	0.439637	0.11423	0.409351
387	73	0.370729	0.280331	0.076095	0.165764	0.175457	0.169303	0.33168	0.1857	0.322704	0.135032	0.192744	0.235221	0.342092	0.371336	0.327412	0.437231	0.195559	0.259493	0.270071	0.473317	0.268986	0.201927	0.165995	0.385902	0.285153	0.22255	0.475758	0.259618	0.352595	0.488621	0.267108	0.318189	0.442577	0.536542	0.276207	0.333589	0.439624	0.276927	0.371109	0.449325	0.305206	0.373087	0.568491	0.0665727	0.0433812	0.208815	0.0436128	0.248861
388	74	0.560333	0.469324	0.0915893	0.190181	0.320282	0.30297	0.608308	0.439744	0.638949	0.301791	0.414501	0.471287	0.611707	0.781127	0.696179	0.795033	0.534328	0.408261	0.578155	0.739591	0.58255	0.366067	0.413464	0.770582	0.557719	0.286049	0.952837	0.613042	0.6937	0.674309	0.62339	0.723519	0.907465	0.953641	0.549794	0.72269	0.866822	0.363881	0.715704	0.932615	0.629449	0.740145	1.09221	0.130091	0.132878	0.475334	0.0750784	0.489207
389	75	0.500726	0.481911	0.0805148	0.196593	0.319079	0.287154	0.396837	0.50646	0.397804	0.30106	0.444653	0.557825	0.385227	0.508765	0.411972	0.616288	0.560542	0.421427	0.726864	0.695166	0.690085	0.407873	0.557144	0.73163	0.593316	0.225489	0.647683	0.808779	0.751039	0.573994	0.802012	0.865452	0.828523	0.580211	0.548495	0.787173	0.92117	0.430414	0.896527	1.23497	0.723582	1.16307	2.60769	0.117553	0.149232	0.523337	0.120022	0.55134
390	76	0.41319	0.383547	0.0237425	0.159466	0.213859	0.278128	0.323991	0.375929	0.33827	0.21182	0.296681	0.459707	0.331933	0.362084	0.325435	0.52687	0.425008	0.305569	0.497807	0.600625	0.45161	0.332627	0.38837	0.585417	0.485177	0.218426	0.488641	0.590174	0.557148	0.456711	0.551092	0.681738	0.606632	0.428339	0.439586	0.571592	0.666822	0.319681	0.622328	0.853409	0.546913	1.70557	1.97325	0.103432	0.0792777	0.402498	0.0832642	0.385135
391	77	0.475309	0.520309	0.141828	0.201902	0.366723	0.339379	0.406522	0.485131	0.457488	0.309097	0.381422	0.486511	0.3506	0.526819	0.484615	0.603535	0.55784	0.388144	0.740109	0.627301	0.589466	0.405852	0.463529	0.649626	0.60312	0.3028	0.573743	0.630761	0.745894	0.518022	0.697827	0.832259	0.713956	0.546242	0.584182	1.16258	1.16837	0.639244	1.00636	0.783284	0.988355	0.627207	0.82936	0.157917	0.232249	0.60355	0.1572	0.617767
392	78	0.582027	0.601615	0.145951	0.191292	0.403732	0.468503	0.451589	0.492185	0.469778	0.331861	0.475796	0.500582	0.385027	0.571985	0.458667	0.60663	0.546197	0.423881	0.648207	0.706855	0.586675	0.431389	0.511564	0.63093	0.684564	0.380804	0.662344	0.688235	0.854026	0.545736	0.75101	0.979548	0.790258	0.563759	0.683776	1.46607	1.39506	0.934935	1.67887	0.961752	1.32787	0.709702	0.900916	0.230579	0.308087	0.606691	0.204231	0.804706
393	79	0.586311	0.609492	0.165295	0.22901	0.415103	0.483317	0.485029	0.581141	0.495551	0.376947	0.450581	0.580135	0.416662	0.617118	0.481973	0.645634	0.559935	0.419601	0.714515	0.688926	0.597921	0.38065	0.494935	0.723341	0.584144	0.356498	0.63481	0.6187	0.790658	0.567035	0.674666	0.85789	0.74699	0.566821	0.689554	1.39416	1.40261	0.729874	1.70305	0.864826	1.29171	0.668394	0.846119	0.244099	0.292735	0.61753	0.216745	0.805537
394	8	0.403254	0.434764	0.0941257	0.15935	0.278378	0.262223	0.329954	0.453342	0.349291	0.244088	0.309145	0.426526	0.320409	0.405262	0.318839	0.549706	0.48901	0.358512	0.732869	0.585263	0.509931	0.336767	0.374638	0.615545	0.54888	0.312606	0.445737	0.636166	0.787649	0.551877	0.594125	0.760127	0.647728	0.448514	0.47554	0.64335	0.687155	0.346035	0.641259	0.728378	0.551505	0.54825	0.705076	0.097343	0.106322	0.415494	0.0794472	0.420654
395	80	0.518929	0.54968	0.161045	0.176239	0.368486	0.405013	0.455353	0.476384	0.447189	0.333897	0.45651	0.508704	0.381681	0.554986	0.416238	0.586578	0.479006	0.365126	0.615858	0.642157	0.519561	0.410133	0.401925	0.580597	0.598047	0.3569	0.6005	0.635062	0.7359	0.512739	0.697516	0.743767	0.700085	0.531087	0.605831	1.44172	1.36707	0.812254	1.40904	0.850543	1.33582	0.611362	0.775288	0.181813	0.254877	0.62069	0.182826	0.744438
396	81	0.486015	0.583755	0.115942	0.161006	0.369489	0.364212	0.38881	0.447699	0.355268	0.352008	0.362543	0.468724	0.329959	0.43477	0.369757	0.519359	0.422186	0.320202	0.646778	0.535694	0.504162	0.383107	0.405611	0.522647	0.559253	0.330596	0.570593	0.619736	0.75633	0.434544	0.640095	0.742398	0.6748	0.501992	0.666634	1.3618	1.17502	1.49002	1.54292	0.752208	1.31933	0.648207	0.81631	0.150574	0.195514	0.551353	0.161755	0.600422
397	82	0.46727	0.493123	0.0561933	0.146064	0.299826	0.324933	0.400123	0.436432	0.400174	0.298408	0.370425	0.539643	0.37177	0.548793	0.403209	0.66644	0.480355	0.420956	0.571764	0.653545	0.591528	0.354616	0.492606	0.662745	0.55267	0.231635	0.575132	0.653801	0.653066	0.494118	0.656972	0.807409	0.696991	0.586962	0.530547	0.685639	0.872669	0.354388	0.755257	1.1062	0.654158	1.16828	2.36611	0.0932495	0.137802	0.487023	0.0947084	0.497141
398	83	0.35988	0.33023	0.112316	0.129891	0.260387	0.272437	0.728848	0.341471	0.69219	0.291366	0.33025	0.31825	0.679844	0.889355	0.815859	0.770463	0.365278	0.237526	0.515369	0.611637	0.423689	0.3218	0.3772	0.736569	0.372237	0.177065	1.20328	0.461446	0.529346	0.49502	0.444577	0.509785	0.869184	0.991656	0.476709	0.508081	0.564421	0.226614	0.5539	0.558398	0.47102	0.45923	0.573556	0.121801	0.149246	0.323841	0.111682	0.34701
399	84	0.466516	0.488866	0.0938781	0.212602	0.327569	0.315262	0.666355	0.453331	0.667222	0.260222	0.333905	0.499647	0.587912	0.829932	0.705238	0.91545	0.439096	0.364791	0.608188	0.82657	0.51012	0.371281	0.40497	0.748312	0.563555	0.317057	0.966265	0.640201	0.666371	0.673462	0.58605	0.758529	0.945717	0.965197	0.511426	0.674071	0.789889	0.352084	0.674731	0.824467	0.61249	0.626165	0.788872	0.125521	0.12924	0.468198	0.0827201	0.455799
400	85	0.436919	0.615333	0.0448513	0.133753	0.379552	0.339235	0.521357	0.795776	0.539316	0.420616	0.544087	0.78625	0.432712	0.589421	0.522597	0.933814	0.795871	0.575407	0.89459	0.922108	0.848648	0.596232	0.693299	0.961738	0.810091	0.294899	0.760814	1.07139	1.03988	0.798658	0.993909	1.11043	0.990863	0.663236	0.72562	0.906596	1.08522	0.41201	0.908551	1.21452	0.803814	0.911262	1.08903	0.0906131	0.118078	0.587955	0.0930586	0.518319
401	86	0.375373	0.560853	0.044388	0.191227	0.323908	0.316207	0.364761	0.54645	0.38995	0.270871	0.366077	0.59612	0.352666	0.45552	0.38452	0.717241	0.585465	0.457453	0.653275	0.712161	0.567488	0.410701	0.503311	0.645548	0.633062	0.318894	0.564207	0.744456	0.814949	0.633479	0.742946	0.838562	0.670324	0.502926	0.540508	0.758191	0.762317	0.379106	0.661351	0.812809	0.65824	0.682524	0.844449	0.100165	0.101611	0.545479	0.0894538	0.402985
402	87	0.377	0.416793	0.0316299	0.134165	0.295933	0.267964	0.484286	0.498504	0.522974	0.302969	0.350802	0.528273	0.472537	0.674648	0.52981	0.752442	0.595068	0.393123	0.58467	0.751093	0.5596	0.374346	0.444122	0.732325	0.499014	0.267397	0.719776	0.766129	0.753526	0.650931	0.719369	0.846572	0.928816	0.681313	0.499054	0.706859	0.752138	0.284193	0.650626	0.849379	0.620186	0.674945	0.786018	0.0545563	0.073218	0.422875	0.0697301	0.428839
403	88	0.469386	0.506506	0.048906	0.132023	0.335777	0.37225	0.357372	0.584793	0.38346	0.324535	0.399776	0.648617	0.366797	0.455867	0.380416	0.6415	0.701552	0.498158	0.733513	0.78503	0.679881	0.469099	0.553354	0.697297	0.63642	0.288343	0.565765	0.836721	0.76691	0.602608	0.765143	0.909351	0.830589	0.533173	0.606018	0.803556	0.922847	0.377252	0.779907	1.11286	0.697176	0.808356	1.0055	0.0681177	0.0858387	0.481464	0.0796773	0.459555
404	89	0.409857	0.443587	0.552589	0.414441	0.647625	0.254	0.585411	0.709994	0.66771	0.596945	0.724729	0.79283	0.547243	0.766313	0.626225	0.954384	0.783938	0.675781	0.5054	0.858204	0.824107	0.627019	0.650558	0.985899	0.584522	0.296773	0.441624	0.577135	0.588134	0.537474	0.546076	0.690293	0.605692	0.42171	0.534625	0.579112	0.691999	0.335855	0.622073	0.706754	0.628033	0.525091	0.722679	0.486496	0.568246	0.728332	0.433081	0.671563
405	90	1.02125	1.13725	0.142325	0.21363	0.404375	0.807938	0.68257	0.517281	0.651993	0.34063	0.483414	0.546553	0.613898	0.735995	0.724382	0.94201	0.572076	0.425861	0.695028	0.811987	0.59263	0.422926	0.490064	0.885306	0.836593	0.768468	0.909649	0.668	0.774402	0.640681	0.668077	0.799058	0.987177	0.773625	1.08484	0.875776	0.859322	0.3522	0.874601	0.832653	0.815148	0.700407	0.801173	0.215531	0.257327	0.616069	0.216186	0.672972
406	91	0.360001	0.429581	0.379377	0.291984	0.52032	0.280613	1.22321	1.35397	1.20876	1.30444	1.45439	1.28656	1.11848	1.40955	1.2857	1.54581	1.45058	1.16208	0.433198	1.20808	1.60164	1.21996	1.35654	1.72989	0.435116	0.240229	0.369316	0.506563	0.53454	0.445363	0.435357	0.574076	0.534224	0.321691	0.440909	0.554793	0.523445	0.27688	0.568331	0.606507	0.442675	0.440288	0.596491	0.414852	0.552114	0.583858	0.456033	0.630714
407	92	0.373772	0.51221	0.0447253	0.163386	0.293274	0.292982	0.380508	0.562373	0.36389	0.287041	0.398183	0.588098	0.312427	0.4342	0.379104	0.684353	0.649277	0.490116	0.703012	0.739085	0.700185	0.418245	0.53923	0.695442	0.604204	0.282481	0.588162	0.758115	0.786687	0.638222	0.724878	0.878753	0.689593	0.509959	0.616189	0.798197	0.915478	0.342624	0.748651	0.934961	0.734111	0.764967	0.863712	0.0604473	0.0865054	0.445864	0.0811903	0.459468
408	93	0.527795	0.634932	0.448376	0.387781	0.675458	0.398144	1.79648	1.81524	1.68162	1.61476	1.87604	1.80241	1.64262	2.13839	1.98768	2.29012	1.98146	1.55308	0.674008	1.81532	2.18727	1.51672	1.78695	2.61932	0.68603	0.409311	0.825431	0.738983	0.843966	0.694287	0.677374	0.888342	0.951054	0.75149	0.712472	0.779096	0.898508	0.34682	0.837591	0.936133	0.701784	0.715681	0.862349	0.498245	0.7305	0.918991	0.570917	0.966328
409	94	0.159158	0.122677	0.907294	0.484186	0.739473	0.173219	0.354989	0.389266	0.391546	0.54855	0.504702	0.312584	0.310575	0.435479	0.377261	0.345402	0.345226	0.354477	0.0832997	0.185399	0.401786	0.344531	0.423354	0.452233	0.116943	0.11307	0.140537	0.0769829	0.103756	0.0420441	0.06302	0.0697436	0.0940732	0.132416	0.226488	0.14943	0.100521	0.0949012	0.156299	0.052204	0.162523	0.0679672	0.0962133	0.692978	0.923113	0.494064	0.845262	0.49989
410	96	0.200687	0.197073	0.999307	0.565748	0.821396	0.179749	0.459929	0.459655	0.446239	0.603318	0.586265	0.393316	0.406461	0.509807	0.467529	0.4217	0.430858	0.372711	0.109965	0.31168	0.451051	0.327771	0.380518	0.484347	0.166834	0.150801	0.166906	0.0895242	0.118832	0.0616632	0.109496	0.121397	0.108774	0.172109	0.251473	0.182231	0.164923	0.127999	0.179461	0.0905161	0.194165	0.0960394	0.102339	0.812145	1.00487	0.561206	0.838967	0.614532
411	97	1.07112	1.14797	0.205144	0.220129	0.361589	0.894145	0.426336	0.448059	0.449311	0.391877	0.485416	0.490553	0.430191	0.53664	0.465544	0.528794	0.487321	0.347444	0.527828	0.514603	0.561897	0.412499	0.425192	0.594826	0.815469	0.948397	0.562496	0.470223	0.6521	0.406193	0.505524	0.59316	0.684246	0.461997	1.27751	0.669783	0.757272	0.40426	0.739711	0.592394	0.688224	0.51628	0.678412	0.262099	0.301126	0.519884	0.240528	0.500992
412	98	0.155843	0.163923	0.9326	0.604151	0.752238	0.149997	0.387933	0.376027	0.407037	0.540685	0.499275	0.407267	0.39579	0.48549	0.390652	0.425661	0.379477	0.389258	0.0832848	0.291448	0.427818	0.344277	0.397764	0.479199	0.153218	0.137568	0.150869	0.0697601	0.11096	0.0703274	0.0884563	0.0638837	0.126969	0.157957	0.259419	0.1539	0.140635	0.147457	0.199533	0.0609393	0.159168	0.059107	0.14005	0.824952	0.934014	0.57693	0.75737	0.545127
413	N10	0.459786	0.497813	0.0903438	0.206784	0.365493	0.326501	0.455806	0.527648	0.545587	0.27547	0.400254	0.458863	0.488058	0.585986	0.514089	0.641501	0.53996	0.403977	0.626178	0.686023	0.57297	0.364931	0.447196	0.676136	0.579496	0.328464	0.674322	0.691629	0.710819	0.592615	0.681185	0.813892	0.836011	0.679431	0.633504	0.776877	0.930683	0.418571	0.833385	0.885714	0.643812	0.675943	0.89662	0.132395	0.143376	0.528564	0.109162	0.489961
414	N8	0.603112	0.734259	0.0605248	0.260724	0.412012	0.468098	0.487223	0.605213	0.5645	0.382767	0.448452	0.659636	0.465377	0.624236	0.536706	0.860334	0.691911	0.627753	0.783289	1.01757	0.672539	0.50969	0.551699	0.764789	0.772496	0.515802	0.667908	0.901088	0.83716	0.831204	0.807414	1.05589	0.866697	0.64435	0.803987	0.886162	1.02374	0.612634	0.9681	1.02225	0.894806	0.717232	0.992907	0.111587	0.142092	0.639826	0.0797539	0.649099
415	N9	0.378059	0.436743	0.04775	0.152665	0.273879	0.312243	0.286581	0.426563	0.430864	0.25993	0.352701	0.428009	0.33869	0.387871	0.36324	0.555724	0.500473	0.377047	0.525921	0.622746	0.455594	0.344456	0.341333	0.540159	0.50388	0.30039	0.45245	0.562935	0.582005	0.61291	0.603315	0.673184	0.628815	0.454188	0.519339	0.591022	0.671237	0.424693	0.611664	0.723449	0.540601	0.498531	0.620393	0.0598296	0.104409	0.395787	0.087939	0.372758
[truncated: 367 more columns]
