# Supplementary material for: Development of core-collections for Guizhou tea genetic resources and GWAS of leaf size using SNP developed by genotyping-by-sequencing
Source: PeerJ. 2020 Mar 13;8:e8572. doi: 10.7717/peerj.8572 (PMC7075365; doi:10.7717/peerj.8572)
Supplement: Table S3 [file peerj-08-8572-s009.xlsx]

## Sheet: Sheet1
	Table S3 Identity-by-state (IBS)-based genetic distance matrix for 299 accessions using 30,282 polymorphic SNPs.
Unit		1	2	3	4	5	6	7	8	9	10	11	12	13	14	15	16	17	18	19	20	21	22	23	24	25	26	27	28	29	30	31	32	33	34	35	36	37	38	39	40	41	42	43	44	45	46	47	48
	DNA ID
1	1
2	100	0.210397
3	102	0.22731	0.23555
4	103	0.236648	0.241876	0.186253
5	107	0.191206	0.206449	0.227321	0.233524
6	110	0.249867	0.257054	0.22671	0.234425	0.250648
7	111	0.246306	0.252464	0.202901	0.210733	0.242973	0.206808
8	113	0.256869	0.257084	0.230505	0.237311	0.253771	0.229325	0.212668
9	114	0.246475	0.252177	0.22373	0.231462	0.245812	0.212015	0.206414	0.229029
10	117	0.269563	0.273011	0.250082	0.255428	0.269326	0.243191	0.231548	0.247543	0.239339
11	118	0.256256	0.258271	0.231559	0.237364	0.256029	0.23652	0.212802	0.230305	0.235826	0.252122
12	119	0.248728	0.250958	0.224421	0.231064	0.245264	0.238115	0.216205	0.236775	0.235726	0.256009	0.237784
13	12	0.24576	0.24621	0.248938	0.253684	0.244306	0.263531	0.269002	0.263382	0.260408	0.275709	0.26426	0.261016
14	120	0.267583	0.268481	0.254158	0.260674	0.267901	0.260454	0.258671	0.265525	0.259707	0.276936	0.267966	0.255374	0.270817
15	122	0.252171	0.253591	0.226133	0.233248	0.250243	0.238462	0.215824	0.239177	0.237952	0.255972	0.23828	0.223906	0.260972	0.257449
16	123	0.253732	0.254227	0.229006	0.234642	0.248404	0.241449	0.219462	0.241121	0.239913	0.258532	0.242493	0.221808	0.263027	0.261873	0.224985
17	124	0.268704	0.272389	0.246958	0.252561	0.268592	0.251461	0.236101	0.254487	0.249718	0.268935	0.256699	0.244655	0.279443	0.274703	0.240646	0.246726
18	126	0.227381	0.229734	0.242563	0.247249	0.22799	0.258712	0.261057	0.259329	0.254416	0.272679	0.261538	0.255598	0.243784	0.267708	0.257904	0.260347	0.273405
19	127	0.196503	0.200706	0.223056	0.228598	0.190048	0.247191	0.240578	0.250356	0.243954	0.265824	0.251322	0.243529	0.242335	0.263912	0.245895	0.247615	0.264361	0.222707
20	128	0.250824	0.253384	0.2507	0.256421	0.252051	0.245047	0.269995	0.267529	0.242608	0.269762	0.270439	0.264325	0.25131	0.2657	0.266318	0.265789	0.275646	0.251189	0.246249
21	13	0.251589	0.249521	0.252743	0.256491	0.249575	0.266116	0.269587	0.265505	0.263172	0.27906	0.267195	0.264127	0.21368	0.273409	0.264715	0.264609	0.282369	0.248637	0.243893	0.25577
22	130	0.253929	0.25216	0.251434	0.256914	0.254128	0.261138	0.269411	0.265723	0.257417	0.272614	0.266122	0.261281	0.249715	0.268172	0.260616	0.263632	0.274791	0.246232	0.247422	0.246215	0.252647
23	131	0.258505	0.254751	0.259298	0.261754	0.258577	0.269871	0.275958	0.268556	0.265816	0.279844	0.268165	0.264484	0.246381	0.271821	0.265108	0.266161	0.28225	0.244244	0.251512	0.255452	0.249687	0.2211
24	133	0.256543	0.254466	0.256735	0.26162	0.25597	0.261299	0.274515	0.271428	0.259352	0.27918	0.272721	0.268427	0.253474	0.273395	0.268142	0.269656	0.282092	0.249546	0.250414	0.242222	0.25647	0.229351	0.226379
25	134	0.25034	0.251826	0.249948	0.256302	0.250541	0.245621	0.270026	0.26784	0.242366	0.268928	0.270694	0.264754	0.251528	0.265018	0.265845	0.266423	0.275105	0.248886	0.247155	0.21624	0.255582	0.243755	0.254506	0.242045
26	135	0.208945	0.219679	0.232526	0.240294	0.207736	0.258389	0.252571	0.261374	0.25437	0.274084	0.258727	0.253539	0.249152	0.272252	0.255937	0.258201	0.274939	0.236736	0.202996	0.254984	0.252748	0.253122	0.254218	0.254801	0.254102
27	136	0.245753	0.248767	0.247669	0.254771	0.242043	0.263767	0.269727	0.268989	0.262764	0.280077	0.268278	0.264727	0.248026	0.274937	0.26489	0.268829	0.282772	0.250535	0.243361	0.254406	0.252613	0.256907	0.258358	0.262598	0.256232	0.250278
28	137	0.252289	0.251639	0.254685	0.260214	0.250804	0.267669	0.27443	0.27301	0.266312	0.283247	0.271737	0.269239	0.249431	0.276497	0.268058	0.271039	0.285516	0.253494	0.246424	0.257965	0.253252	0.254862	0.254724	0.259317	0.256753	0.256424	0.240518
29	138	0.232415	0.234763	0.236905	0.243276	0.232476	0.255119	0.256514	0.257187	0.251691	0.271492	0.257008	0.252951	0.241296	0.267216	0.252779	0.258614	0.274625	0.241588	0.227244	0.24931	0.245945	0.246478	0.245345	0.253089	0.248665	0.237291	0.213338	0.229377
30	139	0.24588	0.249619	0.252058	0.255318	0.245695	0.266049	0.268874	0.268401	0.263818	0.282379	0.270863	0.264365	0.251619	0.277334	0.265493	0.268101	0.284294	0.251749	0.243208	0.259224	0.255828	0.259175	0.258403	0.263229	0.259003	0.250538	0.233292	0.240616	0.214587
31	140	0.258565	0.253945	0.261263	0.263504	0.259276	0.271069	0.278748	0.267613	0.266598	0.282189	0.271779	0.267252	0.251163	0.274107	0.269089	0.26898	0.285542	0.251994	0.251575	0.257017	0.253149	0.254791	0.25299	0.256962	0.255944	0.261303	0.258107	0.254295	0.25	0.259492
32	141	0.24065	0.244614	0.246709	0.25295	0.240906	0.26433	0.266388	0.266852	0.261528	0.279273	0.267579	0.264047	0.246153	0.27557	0.264682	0.265117	0.282674	0.250035	0.239254	0.256648	0.251839	0.255142	0.255177	0.261464	0.257159	0.245943	0.228264	0.235318	0.210192	0.230764	0.256275
33	146	0.244363	0.248048	0.21191	0.221214	0.241965	0.246683	0.232605	0.247718	0.24226	0.266534	0.250357	0.243417	0.256573	0.267671	0.245299	0.249654	0.265491	0.251914	0.239546	0.259825	0.260188	0.259709	0.262729	0.264378	0.258178	0.249675	0.255246	0.262454	0.247897	0.261247	0.263089	0.255847
34	148	0.237258	0.245846	0.208332	0.215983	0.235413	0.244377	0.226557	0.247323	0.240409	0.264697	0.245472	0.241475	0.256537	0.267232	0.240843	0.245156	0.261744	0.250773	0.234251	0.259887	0.258485	0.260837	0.264453	0.266681	0.25953	0.244165	0.250533	0.256389	0.238534	0.250633	0.266444	0.245241	0.217189
35	15	0.266963	0.265574	0.268396	0.274366	0.267453	0.280295	0.287132	0.279395	0.277556	0.291926	0.280553	0.274928	0.248889	0.283955	0.276461	0.280975	0.293569	0.260895	0.262861	0.267308	0.252267	0.260939	0.260194	0.269038	0.268775	0.267448	0.265532	0.266779	0.261228	0.268824	0.26221	0.267795	0.27364	0.274468
36	151	0.244158	0.247488	0.209742	0.219837	0.241652	0.245995	0.230521	0.247637	0.241872	0.265371	0.24761	0.241644	0.255978	0.266026	0.243752	0.246813	0.262373	0.251277	0.238613	0.258144	0.259885	0.257174	0.262744	0.265169	0.257951	0.247914	0.254951	0.258655	0.243025	0.256695	0.263874	0.253844	0.217895	0.213789	0.273655
37	152	0.222563	0.234291	0.160584	0.172809	0.216354	0.217507	0.1813	0.220845	0.212146	0.241017	0.221715	0.212238	0.255033	0.251729	0.214231	0.217777	0.238971	0.244618	0.216802	0.254485	0.258488	0.255721	0.266584	0.26239	0.252248	0.231123	0.250858	0.259668	0.23817	0.250629	0.267022	0.248582	0.188129	0.178501	0.277429	0.184124
38	153	0.24218	0.25035	0.213744	0.222905	0.242929	0.246341	0.232876	0.250602	0.241509	0.265141	0.249592	0.242642	0.255542	0.267466	0.2431	0.245571	0.265048	0.254186	0.239017	0.257208	0.260629	0.256818	0.26115	0.262978	0.258698	0.248919	0.251553	0.258208	0.240632	0.25705	0.264748	0.252102	0.210112	0.218529	0.272885	0.219117	0.18601
39	157	0.233995	0.243176	0.202305	0.212218	0.232519	0.239174	0.224048	0.241836	0.234156	0.258355	0.243385	0.234264	0.251683	0.259619	0.236302	0.240974	0.257248	0.247675	0.230782	0.254547	0.253704	0.253693	0.259312	0.259434	0.251887	0.241808	0.245484	0.253925	0.232555	0.247589	0.260373	0.241277	0.223688	0.216888	0.268356	0.219768	0.171179	0.220665
40	161	0.231817	0.240518	0.202382	0.211959	0.233034	0.236933	0.223522	0.241943	0.234864	0.25764	0.242205	0.234627	0.248924	0.262122	0.237641	0.23903	0.257968	0.24503	0.228829	0.252541	0.251091	0.251988	0.255831	0.257742	0.249159	0.239742	0.248415	0.252094	0.239285	0.248869	0.257251	0.246903	0.219177	0.216123	0.267397	0.217743	0.181807	0.217007	0.21139
41	168	0.255267	0.25289	0.25523	0.259804	0.25495	0.266536	0.27427	0.267106	0.263977	0.280223	0.268045	0.26334	0.24641	0.270566	0.264731	0.266496	0.279244	0.249364	0.250608	0.253249	0.250321	0.249944	0.25118	0.252904	0.253625	0.254929	0.257352	0.254103	0.249155	0.258861	0.244633	0.256367	0.26036	0.264887	0.259237	0.261061	0.262559	0.261552	0.256514	0.251936
42	171	0.256452	0.255769	0.258046	0.261251	0.256958	0.267293	0.275373	0.266788	0.263376	0.282181	0.269911	0.264518	0.249833	0.271433	0.265912	0.268886	0.280468	0.249854	0.251024	0.255844	0.25136	0.253323	0.249211	0.253774	0.254236	0.258564	0.256633	0.255107	0.24887	0.258742	0.248072	0.256596	0.263805	0.264837	0.260186	0.263238	0.266908	0.263603	0.258006	0.252408	0.222588
43	172	0.247946	0.248829	0.248628	0.254972	0.248128	0.251849	0.269784	0.263218	0.248744	0.271128	0.266984	0.260123	0.247494	0.264044	0.261854	0.263558	0.274975	0.247	0.244952	0.232975	0.251334	0.24419	0.25	0.245039	0.231101	0.25303	0.252331	0.253999	0.244861	0.256975	0.247398	0.253417	0.258602	0.259613	0.263342	0.257015	0.256337	0.256622	0.253374	0.248075	0.223633	0.218624
44	173	0.254046	0.254124	0.25459	0.259598	0.254312	0.258841	0.274186	0.269133	0.255696	0.275927	0.272171	0.267574	0.251484	0.271449	0.266917	0.268634	0.280119	0.251789	0.246778	0.238062	0.252706	0.248801	0.254246	0.248682	0.236708	0.256356	0.260355	0.255383	0.251119	0.258615	0.250851	0.256383	0.261364	0.264047	0.265616	0.25997	0.260284	0.262615	0.256825	0.252129	0.246423	0.250018	0.238848
45	177	0.245076	0.244171	0.24876	0.251302	0.245834	0.258277	0.266242	0.253133	0.257783	0.271719	0.257071	0.255304	0.238459	0.267744	0.253516	0.256592	0.26964	0.235368	0.237622	0.24753	0.240152	0.2395	0.232535	0.248834	0.248702	0.247582	0.248488	0.246435	0.239999	0.250939	0.240668	0.246991	0.254641	0.256401	0.251509	0.252389	0.253401	0.251771	0.246333	0.243128	0.239794	0.237834	0.239779	0.242581
46	178	0.259396	0.260156	0.257046	0.264236	0.258681	0.258939	0.278254	0.271595	0.256699	0.280484	0.274964	0.267933	0.253883	0.234322	0.271974	0.271723	0.280943	0.256013	0.253375	0.236542	0.25672	0.252238	0.256168	0.250601	0.23831	0.261712	0.259247	0.260474	0.254063	0.262324	0.254033	0.261289	0.266132	0.267448	0.267514	0.265455	0.266641	0.265199	0.260316	0.257379	0.251807	0.251372	0.242061	0.245683	0.245971
47	179	0.248711	0.249056	0.24854	0.255022	0.251981	0.254447	0.269288	0.264916	0.250988	0.273025	0.268777	0.262821	0.249059	0.261754	0.262736	0.264222	0.274529	0.247959	0.245964	0.235657	0.251794	0.243171	0.248592	0.245093	0.234389	0.253581	0.254761	0.25411	0.246475	0.257461	0.248905	0.256064	0.258914	0.25919	0.263809	0.257854	0.255696	0.257644	0.25245	0.249573	0.242757	0.24545	0.235289	0.233151	0.237325	0.234507
48	18	0.245423	0.240713	0.246974	0.249078	0.241864	0.257295	0.263907	0.259502	0.254547	0.271719	0.260521	0.25414	0.214778	0.264938	0.254289	0.257648	0.272082	0.240152	0.236679	0.248142	0.207979	0.242393	0.239973	0.248153	0.248115	0.246751	0.248033	0.249638	0.236759	0.250489	0.246452	0.245071	0.254263	0.254639	0.243561	0.25435	0.253156	0.253066	0.247307	0.2469	0.239825	0.242697	0.241136	0.245645	0.228317	0.24822	0.242544
49	181	0.250228	0.253068	0.246161	0.253539	0.251083	0.243312	0.267737	0.267527	0.241757	0.267478	0.270135	0.261759	0.251286	0.262295	0.264721	0.266491	0.273921	0.250471	0.248075	0.218817	0.254553	0.245697	0.255415	0.239782	0.218172	0.255215	0.254812	0.259141	0.248115	0.257513	0.257658	0.257101	0.259167	0.259334	0.268263	0.259554	0.252128	0.258184	0.253332	0.248385	0.252803	0.253597	0.23138	0.234834	0.24692	0.235055	0.213065	0.245487
50	186	0.247224	0.245115	0.249544	0.254454	0.248952	0.264814	0.270605	0.261834	0.259511	0.274149	0.264028	0.25866	0.241656	0.265774	0.259171	0.260532	0.276642	0.242839	0.24147	0.250696	0.245942	0.241003	0.244642	0.25023	0.250682	0.251951	0.251392	0.250952	0.243304	0.253825	0.240053	0.247455	0.254405	0.258106	0.254798	0.254681	0.258157	0.256321	0.249299	0.24629	0.237137	0.236682	0.24037	0.217056	0.224399	0.241894	0.223845	0.233307
51	190	0.238213	0.243952	0.208587	0.218901	0.237816	0.236032	0.220385	0.240753	0.232469	0.256105	0.238037	0.231556	0.249679	0.245107	0.233718	0.236401	0.251919	0.245997	0.232357	0.251628	0.25381	0.251536	0.25409	0.255623	0.249302	0.24289	0.253304	0.258996	0.242687	0.25234	0.259233	0.251781	0.234693	0.23106	0.267491	0.230862	0.19611	0.233229	0.220892	0.221572	0.253761	0.255466	0.250949	0.252821	0.247128	0.254894	0.251035	0.247766
52	192	0.248504	0.245739	0.250993	0.254902	0.246897	0.262521	0.269075	0.258614	0.260069	0.272615	0.259645	0.25472	0.240222	0.26627	0.254552	0.259083	0.273479	0.238383	0.243461	0.25079	0.245491	0.238355	0.23687	0.25001	0.250389	0.249241	0.251663	0.250815	0.238017	0.25348	0.244259	0.249242	0.253391	0.257389	0.251449	0.257087	0.255777	0.255215	0.249471	0.246976	0.242062	0.243681	0.243538	0.245315	0.221233	0.247673	0.24065	0.234407
53	193	0.239641	0.247113	0.21033	0.219035	0.239838	0.245475	0.22997	0.248613	0.241671	0.26449	0.247003	0.242252	0.254032	0.265001	0.244389	0.244443	0.263156	0.250846	0.23579	0.257082	0.255819	0.257583	0.262193	0.263335	0.257514	0.246214	0.252225	0.259098	0.243443	0.253722	0.26239	0.251953	0.228125	0.223543	0.271299	0.227022	0.190761	0.22674	0.220826	0.222492	0.260161	0.261907	0.256798	0.260126	0.253816	0.263474	0.257063	0.252442
54	194	0.246009	0.247678	0.249736	0.255587	0.247278	0.264031	0.271854	0.266278	0.261979	0.278862	0.265212	0.259556	0.246329	0.269761	0.261931	0.264983	0.276372	0.243796	0.242673	0.251855	0.250938	0.247649	0.249242	0.257352	0.252802	0.250711	0.245725	0.249155	0.236453	0.246577	0.250749	0.243604	0.248651	0.247112	0.260448	0.254186	0.255483	0.250764	0.2477	0.246505	0.248141	0.247243	0.245348	0.252874	0.237852	0.255303	0.247584	0.242008
55	195	0.253857	0.250691	0.254059	0.259813	0.251843	0.266501	0.27182	0.262516	0.262229	0.276207	0.262957	0.257871	0.244887	0.266221	0.259056	0.262546	0.279094	0.244303	0.249346	0.255549	0.248018	0.245845	0.244414	0.253302	0.252555	0.253737	0.255229	0.256419	0.248447	0.258409	0.248235	0.255593	0.259843	0.262063	0.256488	0.260325	0.260557	0.259598	0.253745	0.25154	0.245519	0.246514	0.246053	0.249441	0.23214	0.25273	0.249593	0.238261
56	20	0.245054	0.247359	0.250158	0.253466	0.245609	0.263071	0.267514	0.264488	0.260003	0.275326	0.264884	0.258478	0.225508	0.272143	0.260586	0.263389	0.277738	0.244507	0.241147	0.252676	0.241909	0.250443	0.248563	0.254197	0.253576	0.249761	0.249611	0.250446	0.241602	0.2531	0.25344	0.246842	0.255414	0.254249	0.254265	0.256633	0.253647	0.256845	0.249343	0.248443	0.250129	0.251748	0.249487	0.253173	0.23943	0.256566	0.249016	0.236114
57	200	0.256431	0.248377	0.25478	0.257908	0.254079	0.267218	0.272993	0.260469	0.262841	0.277372	0.2636	0.257071	0.240771	0.265951	0.256744	0.260754	0.274484	0.242137	0.248089	0.252144	0.244923	0.240501	0.239957	0.251364	0.250936	0.252905	0.255442	0.253586	0.246555	0.256315	0.244053	0.254514	0.260293	0.259153	0.252384	0.25931	0.261385	0.260315	0.253453	0.250919	0.241499	0.245137	0.244747	0.247082	0.229293	0.252009	0.244282	0.235705
58	201	0.255314	0.248704	0.254979	0.260081	0.252278	0.267517	0.274088	0.26435	0.264055	0.276098	0.263303	0.259279	0.243457	0.265794	0.2585	0.261953	0.277387	0.243822	0.249071	0.254786	0.246291	0.241139	0.24211	0.251864	0.252615	0.254287	0.255218	0.252576	0.246812	0.258375	0.24782	0.252614	0.260743	0.260999	0.257592	0.259673	0.262232	0.260774	0.254912	0.251001	0.245574	0.245578	0.245263	0.250128	0.229636	0.252055	0.244608	0.234763
59	202	0.258873	0.255678	0.259392	0.263486	0.260589	0.270447	0.277436	0.262253	0.268382	0.280452	0.26897	0.26362	0.24604	0.270448	0.262917	0.265271	0.279016	0.248734	0.253867	0.256999	0.248696	0.247702	0.244313	0.254404	0.258662	0.2595	0.258206	0.256909	0.250284	0.259352	0.247003	0.258108	0.266741	0.264866	0.257793	0.264533	0.26866	0.267008	0.25935	0.256391	0.244855	0.24783	0.249431	0.254421	0.235115	0.253433	0.248272	0.239108
60	203	0.24124	0.246432	0.214567	0.224769	0.242493	0.236273	0.212675	0.234635	0.232699	0.252908	0.232118	0.228398	0.253746	0.256555	0.225813	0.230402	0.248153	0.250372	0.236856	0.261064	0.255631	0.256814	0.257033	0.26348	0.259573	0.249681	0.255302	0.26252	0.247062	0.256429	0.262643	0.256631	0.238038	0.233805	0.268919	0.236152	0.205045	0.236454	0.22732	0.226833	0.256306	0.261307	0.257362	0.261637	0.247353	0.261899	0.255077	0.249295
61	205	0.234546	0.239818	0.239585	0.247757	0.232077	0.256644	0.258037	0.260631	0.252475	0.273022	0.260057	0.256803	0.24164	0.272784	0.256197	0.25894	0.273936	0.242634	0.231451	0.248251	0.245573	0.249022	0.250252	0.255477	0.250797	0.241322	0.2182	0.218111	0.200886	0.223383	0.251909	0.208188	0.250559	0.239877	0.261439	0.246704	0.238397	0.246584	0.235105	0.235319	0.250681	0.249296	0.244863	0.251801	0.237654	0.256426	0.248725	0.240266
62	206	0.260187	0.256594	0.256107	0.262005	0.257645	0.269993	0.275167	0.265589	0.265568	0.279055	0.267646	0.262584	0.25336	0.270299	0.266071	0.267387	0.281924	0.25	0.25224	0.258717	0.25453	0.250878	0.249548	0.256305	0.258677	0.260001	0.259843	0.25892	0.253056	0.262568	0.252235	0.26002	0.262827	0.263362	0.265385	0.264156	0.263552	0.262711	0.258997	0.256638	0.251029	0.252553	0.252649	0.25599	0.234229	0.257059	0.250559	0.243505
63	209	0.245596	0.247434	0.227933	0.233957	0.241648	0.240135	0.22295	0.233548	0.240088	0.254366	0.237617	0.234084	0.248572	0.257588	0.233142	0.236853	0.25499	0.247415	0.239755	0.256843	0.250937	0.255765	0.251411	0.260923	0.25774	0.244727	0.256574	0.256546	0.246385	0.257258	0.257136	0.253295	0.243421	0.242279	0.26461	0.240455	0.221376	0.244784	0.237678	0.234408	0.254798	0.254053	0.25069	0.25662	0.242256	0.257848	0.250365	0.245969
64	210	0.269566	0.266795	0.261973	0.26355	0.264153	0.2712	0.265487	0.261151	0.267809	0.279381	0.267425	0.262828	0.26363	0.279928	0.265046	0.266025	0.279433	0.263839	0.258854	0.272766	0.265167	0.265456	0.264555	0.271599	0.273588	0.268808	0.273774	0.27121	0.265607	0.273864	0.269599	0.271289	0.269554	0.269032	0.276607	0.269112	0.260573	0.268458	0.263022	0.259281	0.264733	0.265784	0.266059	0.269346	0.253635	0.274061	0.266068	0.258393
65	213	0.255543	0.256585	0.236066	0.241361	0.251096	0.249494	0.232669	0.241978	0.249576	0.264165	0.247061	0.242561	0.256565	0.267081	0.24267	0.245479	0.261721	0.256907	0.247316	0.264044	0.258791	0.262488	0.260529	0.268882	0.265267	0.255155	0.264182	0.2648	0.254722	0.267636	0.266108	0.261875	0.25277	0.249044	0.273254	0.251424	0.228674	0.252435	0.245264	0.241777	0.262437	0.262961	0.260332	0.266217	0.252034	0.269631	0.260916	0.25316
66	214	0.252476	0.25954	0.229531	0.235998	0.253003	0.244071	0.219159	0.239978	0.241606	0.259727	0.243561	0.224919	0.267155	0.262426	0.224625	0.231488	0.244385	0.260028	0.248201	0.269648	0.270067	0.266584	0.271236	0.273839	0.268355	0.258441	0.271216	0.273511	0.261467	0.27111	0.274079	0.270249	0.249388	0.244682	0.281604	0.246469	0.216673	0.24804	0.239906	0.237567	0.269666	0.271674	0.266512	0.272212	0.260484	0.276825	0.266941	0.259685
67	217	0.242433	0.239821	0.243194	0.24892	0.2411	0.256733	0.262695	0.253434	0.251983	0.270716	0.255375	0.251651	0.235383	0.260864	0.255394	0.254273	0.269528	0.233506	0.23504	0.244737	0.23996	0.234641	0.23597	0.247592	0.243386	0.244058	0.249514	0.246355	0.234305	0.249834	0.242592	0.246467	0.251248	0.251439	0.249457	0.249162	0.252119	0.248869	0.247008	0.244312	0.236443	0.237748	0.23631	0.240502	0.229089	0.243279	0.239743	0.228069
68	22	0.244471	0.247231	0.249557	0.252404	0.242782	0.261163	0.266578	0.2609	0.255103	0.271652	0.262869	0.256725	0.237261	0.26592	0.257284	0.259976	0.275466	0.24236	0.243137	0.248254	0.240814	0.242986	0.243865	0.250842	0.24756	0.250366	0.248671	0.249212	0.240221	0.252219	0.24599	0.249208	0.252762	0.253051	0.247413	0.255501	0.250704	0.253707	0.246374	0.247478	0.242499	0.246128	0.245556	0.24635	0.235257	0.248446	0.244411	0.233557
69	227	0.244972	0.244764	0.220815	0.201825	0.244377	0.251586	0.241581	0.254639	0.246787	0.267158	0.25465	0.248162	0.248465	0.266532	0.251848	0.251138	0.266679	0.248531	0.237414	0.252755	0.252778	0.254492	0.253916	0.257846	0.253003	0.24522	0.251254	0.254416	0.240944	0.25509	0.256526	0.251457	0.239168	0.239183	0.266236	0.239392	0.218813	0.240843	0.234976	0.233371	0.252974	0.252989	0.249594	0.254272	0.246338	0.257101	0.250431	0.243269
70	23	0.245817	0.25393	0.221827	0.228008	0.244851	0.244982	0.227847	0.244846	0.242487	0.262542	0.245436	0.235778	0.25375	0.263887	0.239817	0.243399	0.260338	0.253392	0.244406	0.261129	0.257026	0.256882	0.25967	0.262102	0.260358	0.251294	0.260593	0.265064	0.250603	0.262168	0.26874	0.260144	0.24031	0.23785	0.270084	0.240111	0.209211	0.239996	0.22989	0.230356	0.260213	0.262694	0.258267	0.264127	0.247166	0.267078	0.259283	0.250009
71	233	0.248505	0.248269	0.251007	0.256175	0.246544	0.265507	0.27073	0.263628	0.261527	0.278386	0.265134	0.259683	0.246051	0.269	0.261005	0.263567	0.277789	0.24616	0.244857	0.253418	0.246914	0.250971	0.250619	0.256858	0.252695	0.25211	0.254761	0.257892	0.245907	0.257179	0.251864	0.25206	0.26059	0.257672	0.261115	0.258537	0.256904	0.25831	0.254484	0.249288	0.247733	0.249211	0.24708	0.253835	0.237696	0.25425	0.246275	0.242814
72	234	0.24992	0.250608	0.239619	0.222454	0.249431	0.261974	0.264257	0.262816	0.258691	0.274812	0.262619	0.259229	0.24689	0.270402	0.26243	0.263189	0.276099	0.247504	0.242755	0.256978	0.254817	0.25473	0.25353	0.259102	0.255443	0.250991	0.256365	0.257686	0.247589	0.256926	0.254429	0.256785	0.254531	0.253649	0.263556	0.253644	0.244905	0.254817	0.246491	0.24743	0.251082	0.254044	0.250727	0.253477	0.240638	0.255946	0.252511	0.2426
73	235	0.232273	0.234418	0.201342	0.184145	0.233668	0.239561	0.224855	0.23882	0.236744	0.257284	0.241112	0.233208	0.240514	0.255565	0.238288	0.237137	0.255832	0.235531	0.226304	0.245973	0.246243	0.246012	0.246139	0.250902	0.247891	0.234278	0.246999	0.247804	0.23449	0.248578	0.248871	0.245835	0.230667	0.224755	0.259228	0.225917	0.196497	0.228279	0.218969	0.217706	0.248332	0.246785	0.243355	0.250853	0.234452	0.250206	0.244247	0.23832
74	237	0.229799	0.237138	0.190561	0.201828	0.230612	0.234203	0.215733	0.236343	0.231032	0.254091	0.238011	0.228488	0.248102	0.256951	0.232404	0.233604	0.251572	0.243404	0.227638	0.251695	0.252575	0.248316	0.255634	0.256927	0.251732	0.240216	0.251803	0.25614	0.238255	0.250162	0.258078	0.249481	0.222002	0.217484	0.26803	0.219558	0.177413	0.219433	0.21081	0.209503	0.256258	0.256258	0.250746	0.255221	0.243991	0.257851	0.248955	0.247222
75	239	0.249559	0.242725	0.247805	0.254266	0.245681	0.2632	0.267123	0.254841	0.256265	0.273003	0.256622	0.252858	0.24136	0.265357	0.256408	0.259653	0.272327	0.239063	0.240877	0.247595	0.244285	0.238169	0.237135	0.247999	0.249651	0.249361	0.251902	0.249897	0.240525	0.253901	0.247278	0.25085	0.254042	0.256046	0.254339	0.254377	0.254638	0.253912	0.251119	0.243833	0.237959	0.241215	0.239204	0.247127	0.223363	0.248745	0.238794	0.235759
76	24	0.244712	0.246195	0.218994	0.230771	0.24595	0.244433	0.229494	0.243305	0.239484	0.260192	0.243656	0.236783	0.25498	0.259985	0.239668	0.242492	0.258693	0.251995	0.239633	0.25882	0.256539	0.253973	0.258876	0.261163	0.25842	0.249574	0.260068	0.261592	0.2515	0.260246	0.262323	0.258413	0.241	0.236388	0.271051	0.238533	0.209527	0.23897	0.231639	0.230965	0.259394	0.260566	0.256284	0.259461	0.246271	0.26346	0.25456	0.25212
77	240	0.256443	0.253358	0.25905	0.261271	0.254444	0.27044	0.275227	0.263558	0.265875	0.278388	0.26448	0.260707	0.246609	0.269774	0.263794	0.267139	0.278138	0.245116	0.251469	0.254132	0.2498	0.245132	0.242651	0.253789	0.255551	0.256254	0.258342	0.256506	0.24938	0.260459	0.250795	0.25678	0.261751	0.26284	0.257817	0.261724	0.265544	0.2614	0.258536	0.255062	0.244224	0.24806	0.248128	0.251886	0.232977	0.254382	0.245974	0.242095
78	241	0.164294	0.188206	0.21278	0.221362	0.164921	0.241317	0.229586	0.246463	0.236695	0.26204	0.247197	0.2384	0.242346	0.265376	0.240725	0.240682	0.26066	0.222941	0.169609	0.244221	0.247798	0.251574	0.258331	0.255217	0.244946	0.183531	0.23621	0.248445	0.221552	0.238662	0.255841	0.232649	0.233085	0.224076	0.266646	0.231608	0.199935	0.233153	0.222594	0.223005	0.254416	0.255887	0.246404	0.250583	0.249464	0.256598	0.249179	0.243945
79	244	0.20673	0.214415	0.231956	0.237991	0.20426	0.250504	0.24833	0.247553	0.248232	0.270196	0.251361	0.243813	0.240159	0.268388	0.245984	0.251429	0.26557	0.226227	0.203446	0.247416	0.241739	0.247568	0.248131	0.248999	0.246513	0.214382	0.243951	0.250163	0.236398	0.245397	0.250713	0.242473	0.242195	0.239895	0.259314	0.240685	0.228128	0.243475	0.235177	0.233778	0.245371	0.246676	0.242031	0.248699	0.235352	0.251472	0.244909	0.239135
80	245	0.226372	0.23628	0.193778	0.202224	0.225728	0.234686	0.217145	0.238773	0.230394	0.253355	0.235809	0.230164	0.247999	0.258176	0.232669	0.237303	0.254393	0.240619	0.223672	0.24982	0.252528	0.251446	0.259593	0.258184	0.250221	0.236489	0.24634	0.254454	0.234716	0.246478	0.259785	0.245268	0.220169	0.214559	0.267827	0.216315	0.174664	0.21806	0.209827	0.205512	0.256031	0.259449	0.2492	0.255328	0.244383	0.260472	0.250676	0.244933
81	249	0.220075	0.234312	0.152963	0.165605	0.218688	0.214599	0.178497	0.219992	0.211164	0.239174	0.219117	0.210667	0.253535	0.249866	0.212324	0.215269	0.236003	0.243907	0.216601	0.25181	0.2556	0.255424	0.264696	0.261212	0.252404	0.230385	0.25002	0.259254	0.236015	0.249563	0.267908	0.247852	0.195681	0.186844	0.275202	0.192115	0.118218	0.195447	0.182781	0.185456	0.26226	0.263946	0.253953	0.258893	0.254092	0.264163	0.254749	0.251049
82	25	0.262721	0.264926	0.24132	0.244976	0.260373	0.255295	0.245689	0.25986	0.252751	0.272459	0.262452	0.253354	0.268383	0.272811	0.256634	0.257834	0.272162	0.265464	0.257167	0.260614	0.270526	0.267058	0.271729	0.270075	0.262035	0.263977	0.273705	0.27505	0.264033	0.27364	0.275334	0.271564	0.256555	0.256516	0.282112	0.256036	0.232698	0.254979	0.24859	0.247164	0.269182	0.271751	0.263417	0.267302	0.262304	0.270089	0.263072	0.264083
83	251	0.229707	0.233953	0.19513	0.207744	0.226647	0.232701	0.220826	0.234753	0.229647	0.251108	0.235841	0.228068	0.242315	0.254323	0.229169	0.232587	0.251037	0.23953	0.223491	0.244988	0.246109	0.243984	0.246674	0.249836	0.244743	0.234356	0.244329	0.250697	0.23206	0.244798	0.251761	0.24408	0.221713	0.216933	0.261157	0.218406	0.185859	0.220358	0.21221	0.210128	0.24807	0.24833	0.242247	0.247212	0.234318	0.252151	0.242583	0.234138
84	252	0.234667	0.243194	0.191976	0.202337	0.232934	0.235749	0.214218	0.238461	0.231895	0.256602	0.237799	0.230318	0.253879	0.257816	0.232916	0.234914	0.253303	0.245729	0.230053	0.255729	0.253369	0.251701	0.259639	0.260714	0.25542	0.240162	0.253873	0.258877	0.240821	0.253233	0.263527	0.250263	0.222654	0.214904	0.271683	0.219786	0.174633	0.220109	0.213082	0.21299	0.259796	0.260397	0.254928	0.25891	0.249419	0.263674	0.25351	0.249681
85	258	0.252312	0.251543	0.253769	0.257703	0.25458	0.267907	0.274223	0.265216	0.264558	0.276565	0.26425	0.261811	0.245892	0.269263	0.260257	0.263919	0.278577	0.244826	0.248895	0.255267	0.248771	0.244988	0.242869	0.251455	0.25457	0.250854	0.255217	0.254228	0.246052	0.257039	0.248328	0.252126	0.258624	0.261685	0.258415	0.260431	0.260203	0.257258	0.255809	0.253025	0.243012	0.244319	0.247896	0.249159	0.227568	0.253694	0.246969	0.23976
86	26	0.246803	0.251751	0.219539	0.227946	0.245285	0.241829	0.222792	0.241283	0.239835	0.260228	0.24354	0.235772	0.259582	0.262787	0.236869	0.24075	0.257268	0.253832	0.242175	0.26226	0.262756	0.25579	0.261312	0.263974	0.261685	0.251887	0.261198	0.265219	0.250222	0.263073	0.266893	0.259934	0.243537	0.237961	0.273796	0.24043	0.207939	0.239201	0.231486	0.232082	0.262101	0.262602	0.260043	0.26619	0.252447	0.268649	0.259171	0.255196
87	260	0.259208	0.25333	0.259897	0.262992	0.258351	0.272733	0.280185	0.268508	0.269383	0.28188	0.269976	0.267037	0.250616	0.272523	0.265463	0.26695	0.280119	0.249027	0.251778	0.260899	0.25061	0.248576	0.24854	0.256709	0.258501	0.256746	0.258174	0.258802	0.251685	0.26119	0.252327	0.258207	0.266622	0.267094	0.260979	0.264926	0.268514	0.266292	0.262036	0.256839	0.248355	0.248676	0.250264	0.253548	0.229033	0.255324	0.249716	0.243736
88	263	0.25083	0.246736	0.250329	0.255205	0.252153	0.262941	0.271308	0.260932	0.259137	0.272867	0.261658	0.257092	0.242276	0.267989	0.256997	0.259459	0.27541	0.240514	0.243227	0.252659	0.243963	0.241339	0.238426	0.248056	0.250166	0.250479	0.250256	0.250954	0.238731	0.252769	0.247222	0.249197	0.257344	0.259062	0.25391	0.258168	0.259536	0.257089	0.253887	0.248428	0.244824	0.241934	0.243244	0.246452	0.22005	0.249438	0.240023	0.234727
89	265	0.222926	0.223773	0.242202	0.246629	0.216942	0.261136	0.259672	0.261977	0.256087	0.274785	0.262083	0.25896	0.24698	0.269336	0.25766	0.258878	0.275564	0.238315	0.210768	0.254738	0.251845	0.253609	0.254201	0.257226	0.255843	0.223733	0.253473	0.252121	0.241715	0.252228	0.256718	0.249818	0.251854	0.247964	0.26511	0.249715	0.239323	0.25164	0.245438	0.244764	0.253582	0.253084	0.251489	0.255897	0.244679	0.258718	0.253246	0.245397
90	267	0.254405	0.251384	0.251567	0.255681	0.254055	0.264039	0.267898	0.262564	0.262434	0.276893	0.265155	0.260569	0.248021	0.269909	0.260446	0.26323	0.278168	0.246608	0.245846	0.255474	0.250274	0.246821	0.245571	0.254231	0.254593	0.251162	0.255057	0.252449	0.245236	0.255827	0.251236	0.25338	0.258172	0.258308	0.259519	0.257723	0.254366	0.257994	0.252438	0.248425	0.248266	0.250607	0.250129	0.253694	0.238409	0.254209	0.248465	0.240225
91	268	0.231586	0.229195	0.243301	0.249537	0.227146	0.259876	0.261798	0.260342	0.258574	0.275984	0.262079	0.260499	0.245939	0.27148	0.26033	0.262851	0.276575	0.241433	0.212838	0.254958	0.250366	0.249801	0.250691	0.25505	0.254923	0.23399	0.251831	0.252106	0.243798	0.2545	0.253431	0.248248	0.254675	0.252106	0.265507	0.253785	0.245595	0.252231	0.247064	0.249907	0.253004	0.252833	0.251942	0.255868	0.242752	0.25878	0.251585	0.241704
92	269	0.257037	0.254493	0.258866	0.263495	0.25886	0.271633	0.278108	0.267472	0.268242	0.281845	0.267854	0.264034	0.24728	0.272246	0.264047	0.266124	0.281731	0.248169	0.251887	0.257752	0.249906	0.247214	0.243397	0.253056	0.256165	0.256124	0.25932	0.256027	0.250139	0.25993	0.249764	0.257781	0.262476	0.26528	0.260299	0.262505	0.267213	0.263225	0.261171	0.254134	0.247696	0.249433	0.249407	0.254278	0.236734	0.255151	0.251487	0.240512
93	27	0.262643	0.268392	0.241754	0.246766	0.264388	0.258623	0.240687	0.258317	0.257198	0.276233	0.258644	0.251884	0.271969	0.277595	0.253496	0.254645	0.27078	0.269316	0.260092	0.275763	0.272451	0.272935	0.273966	0.278333	0.27609	0.268398	0.276266	0.27925	0.268794	0.278107	0.27885	0.276054	0.256582	0.254639	0.283472	0.255465	0.229807	0.257127	0.251953	0.250071	0.272768	0.275589	0.27517	0.277751	0.266815	0.279822	0.274079	0.267718
94	270	0.254992	0.25356	0.258371	0.261195	0.254723	0.266873	0.275983	0.263446	0.265268	0.279593	0.267438	0.262305	0.245262	0.272729	0.265989	0.268789	0.281554	0.24727	0.248308	0.254192	0.248226	0.246422	0.243652	0.254646	0.255353	0.254632	0.254612	0.252474	0.248182	0.259017	0.249858	0.25109	0.261635	0.264237	0.259224	0.261389	0.263767	0.262707	0.257007	0.251895	0.246669	0.249067	0.249296	0.252713	0.239843	0.254699	0.249339	0.242494
95	273	0.229173	0.225339	0.235233	0.242928	0.228542	0.243147	0.256577	0.256367	0.240258	0.267997	0.258441	0.254647	0.245269	0.265012	0.252936	0.254446	0.270814	0.236865	0.22117	0.229647	0.249736	0.242126	0.249745	0.243852	0.229366	0.234249	0.246975	0.249593	0.235884	0.251041	0.250145	0.245926	0.246644	0.247099	0.262697	0.247145	0.236458	0.243739	0.240481	0.239962	0.247841	0.250612	0.234811	0.24323	0.237834	0.244279	0.237089	0.239075
96	279	0.186573	0.196804	0.221969	0.228603	0.183	0.247363	0.24143	0.250446	0.241504	0.265811	0.251123	0.24309	0.243547	0.263949	0.244186	0.247615	0.262903	0.222131	0.179888	0.248298	0.248673	0.250823	0.253311	0.253663	0.24615	0.201212	0.239972	0.248154	0.227232	0.242993	0.254072	0.236621	0.237692	0.232419	0.2622	0.236821	0.214701	0.23661	0.229003	0.228935	0.250299	0.251745	0.244096	0.251115	0.24094	0.253738	0.247092	0.240952
97	28	0.259293	0.256879	0.256857	0.262081	0.260248	0.268971	0.274807	0.266146	0.266597	0.280398	0.267757	0.261092	0.247	0.272564	0.26202	0.266007	0.280014	0.246457	0.251296	0.257013	0.247215	0.247677	0.244174	0.254527	0.257867	0.257613	0.259643	0.256605	0.251542	0.261558	0.254254	0.257947	0.261716	0.266771	0.259757	0.262264	0.265538	0.262125	0.260428	0.25498	0.248915	0.24847	0.252979	0.254233	0.238648	0.255341	0.251356	0.239349
98	280	0.25272	0.248162	0.255439	0.257777	0.249781	0.264541	0.272921	0.263971	0.260053	0.277444	0.264551	0.256763	0.243702	0.266243	0.262844	0.264905	0.277404	0.243623	0.246993	0.252064	0.24525	0.242675	0.24335	0.251865	0.251152	0.251727	0.253489	0.251303	0.244474	0.256604	0.246105	0.25185	0.258294	0.259465	0.256726	0.25742	0.260761	0.260945	0.25407	0.250835	0.241715	0.246521	0.24498	0.250082	0.234938	0.252136	0.244955	0.239654
99	281	0.250446	0.247584	0.253254	0.258409	0.250124	0.264224	0.273077	0.261189	0.262616	0.27619	0.264443	0.25944	0.245508	0.268397	0.259732	0.264187	0.277782	0.241102	0.244709	0.253081	0.247264	0.244853	0.242114	0.251133	0.251055	0.251751	0.253095	0.252206	0.242216	0.255745	0.248072	0.251424	0.257814	0.261247	0.255411	0.259752	0.262445	0.258077	0.255054	0.249569	0.246085	0.24647	0.245084	0.249909	0.232473	0.252873	0.242567	0.235349
100	282	0.241978	0.246491	0.211807	0.218959	0.239174	0.244355	0.231259	0.244518	0.240667	0.262103	0.244691	0.239627	0.253333	0.26258	0.241327	0.244359	0.261185	0.244658	0.236349	0.256147	0.254493	0.253184	0.256484	0.259552	0.25582	0.245209	0.254144	0.257559	0.245894	0.257439	0.257797	0.254901	0.232125	0.231285	0.269078	0.231183	0.199987	0.232149	0.223978	0.224051	0.254474	0.256921	0.252673	0.257045	0.244421	0.260888	0.254563	0.249634
101	284	0.225778	0.22571	0.242971	0.249343	0.220484	0.260431	0.262004	0.259915	0.256698	0.274801	0.262437	0.257172	0.24677	0.270365	0.259255	0.260343	0.275631	0.234843	0.216544	0.252732	0.24935	0.250222	0.249414	0.253526	0.252996	0.232176	0.25453	0.254385	0.243374	0.251696	0.256766	0.25021	0.25444	0.250216	0.265238	0.254932	0.244019	0.253377	0.247251	0.24453	0.253789	0.254469	0.249242	0.255045	0.23955	0.258654	0.252701	0.243638
102	285	0.257866	0.254445	0.258624	0.262417	0.258278	0.270515	0.27657	0.266635	0.26729	0.280723	0.267957	0.266035	0.250202	0.272313	0.265559	0.268308	0.282324	0.246877	0.249716	0.255045	0.25204	0.249962	0.246779	0.253815	0.254894	0.256897	0.25818	0.25575	0.250945	0.259857	0.250806	0.257576	0.264061	0.264312	0.261747	0.262296	0.265669	0.262337	0.259819	0.256439	0.249604	0.250076	0.252794	0.25195	0.241415	0.254409	0.247556	0.244247
103	286	0.244822	0.246948	0.220008	0.224709	0.246099	0.249898	0.238973	0.249626	0.246203	0.266096	0.24862	0.245807	0.255066	0.265139	0.245605	0.247532	0.264371	0.250845	0.239063	0.257905	0.257035	0.255549	0.258084	0.25994	0.257855	0.248278	0.258222	0.260428	0.248459	0.259856	0.260943	0.255195	0.239113	0.236935	0.270126	0.238242	0.210623	0.237988	0.231936	0.230769	0.257836	0.25799	0.254863	0.258621	0.2461	0.262827	0.253051	0.250463
104	287	0.211161	0.214126	0.234025	0.24098	0.201098	0.255258	0.253413	0.25455	0.252395	0.2704	0.257824	0.251251	0.245226	0.26712	0.253163	0.253609	0.269753	0.231749	0.199711	0.249223	0.25077	0.249364	0.25269	0.253161	0.25096	0.217605	0.248771	0.253006	0.233225	0.248341	0.252558	0.244169	0.245722	0.243367	0.26459	0.244666	0.229433	0.246329	0.240259	0.238767	0.25162	0.253368	0.248363	0.254293	0.243341	0.257374	0.251539	0.246145
105	29	0.249875	0.252306	0.24781	0.254758	0.249817	0.240032	0.267222	0.266312	0.239338	0.26692	0.268113	0.261576	0.249575	0.262516	0.264762	0.266295	0.273327	0.250528	0.244479	0.21481	0.253184	0.243368	0.253865	0.240332	0.213489	0.253352	0.254597	0.25502	0.246233	0.259115	0.254959	0.255669	0.25755	0.258713	0.267414	0.259161	0.252735	0.257143	0.25087	0.248061	0.250221	0.251136	0.22702	0.234137	0.246	0.232533	0.22905	0.245169
106	292	0.24758	0.250709	0.247764	0.253078	0.248462	0.24299	0.266188	0.263334	0.237429	0.265212	0.267191	0.260499	0.247353	0.262057	0.261417	0.263234	0.272157	0.245607	0.244132	0.21344	0.252418	0.242351	0.251668	0.237983	0.212571	0.250642	0.254599	0.254964	0.244826	0.257123	0.253832	0.255293	0.256591	0.257837	0.264845	0.257199	0.252009	0.256143	0.249442	0.248213	0.251005	0.250511	0.227465	0.233073	0.244632	0.233743	0.230303	0.242454
107	293	0.245832	0.245311	0.250686	0.255938	0.246069	0.254616	0.266709	0.268401	0.252728	0.274699	0.268556	0.264622	0.253642	0.269608	0.264813	0.267457	0.278226	0.247789	0.238924	0.232487	0.257324	0.250563	0.254396	0.237232	0.235431	0.246095	0.255648	0.256385	0.248295	0.258823	0.259426	0.25477	0.259135	0.25883	0.26808	0.258103	0.254265	0.25742	0.253866	0.252884	0.254106	0.255783	0.243209	0.244773	0.248934	0.246871	0.241724	0.250035
108	294	0.25138	0.248683	0.255353	0.259059	0.253076	0.267326	0.27376	0.261991	0.262127	0.275727	0.263859	0.259762	0.242626	0.266516	0.260823	0.263582	0.276437	0.241347	0.245838	0.250655	0.245696	0.244719	0.242386	0.251894	0.250749	0.252575	0.253487	0.25252	0.245783	0.257079	0.247799	0.252123	0.259657	0.261012	0.254916	0.258545	0.261411	0.25942	0.253716	0.251064	0.244867	0.244507	0.244565	0.246649	0.233699	0.251145	0.244366	0.236587
109	295	0.253941	0.249857	0.254862	0.258672	0.251358	0.267754	0.272947	0.265589	0.264048	0.280141	0.266439	0.262162	0.243462	0.272233	0.264846	0.265994	0.280611	0.246989	0.246239	0.254593	0.247996	0.245194	0.245292	0.255424	0.253777	0.251493	0.2503	0.252994	0.238513	0.252361	0.25119	0.24962	0.257988	0.259915	0.258856	0.257271	0.260304	0.257221	0.253007	0.251854	0.247388	0.24826	0.249813	0.252242	0.239466	0.256523	0.250697	0.239215
110	296	0.249526	0.249911	0.253466	0.25907	0.248631	0.262312	0.270304	0.265811	0.261086	0.278483	0.268102	0.262219	0.248255	0.270302	0.265627	0.266266	0.281276	0.250532	0.242868	0.250881	0.250214	0.249761	0.252269	0.254652	0.250683	0.252747	0.245409	0.250298	0.238554	0.252421	0.251725	0.250251	0.257204	0.258575	0.263827	0.256498	0.255615	0.254903	0.251093	0.246908	0.252662	0.252754	0.247693	0.250973	0.24385	0.252672	0.247731	0.242385
111	297	0.246625	0.245396	0.245604	0.25171	0.243249	0.257082	0.263816	0.256192	0.254136	0.267738	0.257422	0.254954	0.238286	0.264051	0.256606	0.254845	0.272348	0.236264	0.240037	0.245161	0.243047	0.240779	0.241474	0.247995	0.244465	0.247967	0.2481	0.246875	0.235484	0.250781	0.240226	0.247895	0.249924	0.252802	0.250912	0.250394	0.25251	0.248867	0.245297	0.243024	0.234114	0.238607	0.236279	0.243364	0.225559	0.242478	0.236259	0.231147
112	298	0.209957	0.219337	0.241068	0.245393	0.208143	0.25828	0.256265	0.260335	0.255317	0.275906	0.261302	0.256585	0.249929	0.271851	0.2565	0.260232	0.275274	0.232722	0.210013	0.254875	0.252781	0.255858	0.257454	0.257929	0.255353	0.22154	0.248308	0.255219	0.240053	0.252641	0.261484	0.248448	0.251871	0.245872	0.269075	0.249152	0.23549	0.251823	0.242798	0.242799	0.258199	0.257985	0.254033	0.257873	0.247207	0.260995	0.255283	0.248751
113	299	0.257052	0.256689	0.257829	0.262	0.255168	0.267339	0.27646	0.268608	0.264166	0.282462	0.269227	0.266656	0.248406	0.270597	0.266003	0.270434	0.282633	0.248671	0.250051	0.251508	0.253324	0.250009	0.25116	0.25309	0.253164	0.256448	0.256443	0.252101	0.249774	0.25838	0.247724	0.257018	0.260878	0.263224	0.260321	0.260878	0.265719	0.262457	0.257484	0.252732	0.245228	0.247263	0.247595	0.251873	0.239761	0.250551	0.246733	0.244482
114	3	0.268905	0.267036	0.268775	0.272589	0.267547	0.282282	0.288157	0.279148	0.277509	0.291414	0.282452	0.277156	0.259345	0.283849	0.276853	0.280882	0.291895	0.259298	0.262396	0.267423	0.263957	0.258813	0.260173	0.268713	0.267792	0.267744	0.269024	0.267535	0.261745	0.268846	0.264041	0.269535	0.275348	0.276301	0.270899	0.273533	0.277691	0.275057	0.269363	0.264785	0.262101	0.263684	0.263518	0.26587	0.251429	0.266328	0.262551	0.254225
115	302	0.246305	0.243318	0.246904	0.254652	0.242664	0.259023	0.268849	0.259042	0.258949	0.272743	0.262427	0.255012	0.240958	0.263715	0.258032	0.261038	0.274383	0.241785	0.240422	0.24873	0.245566	0.242241	0.244636	0.249222	0.246316	0.247881	0.248068	0.245826	0.238196	0.25042	0.239593	0.24578	0.253708	0.254582	0.255313	0.25131	0.253622	0.25638	0.247784	0.247053	0.239667	0.239783	0.239772	0.244887	0.23093	0.24684	0.238821	0.234014
116	303	0.244808	0.244354	0.243744	0.252146	0.244881	0.255975	0.263595	0.25617	0.253515	0.272177	0.260566	0.255868	0.235361	0.265753	0.256152	0.258481	0.275436	0.239648	0.239171	0.244142	0.242425	0.241111	0.24269	0.246688	0.244569	0.245411	0.245716	0.242814	0.234871	0.247949	0.239661	0.245935	0.248927	0.25158	0.253628	0.252334	0.251149	0.249573	0.245485	0.246414	0.23821	0.239754	0.238018	0.24308	0.230798	0.24506	0.239414	0.234465
117	304	0.205261	0.209816	0.231632	0.237891	0.203759	0.250575	0.249163	0.253094	0.245415	0.267462	0.254735	0.247856	0.241475	0.265963	0.247494	0.248912	0.267706	0.223115	0.20397	0.248653	0.245635	0.24526	0.247431	0.249909	0.246065	0.216963	0.243286	0.246047	0.230621	0.24552	0.249855	0.241173	0.243965	0.241463	0.259213	0.243115	0.227969	0.242915	0.235453	0.234973	0.250318	0.251633	0.244506	0.248237	0.238586	0.254701	0.245321	0.238338
118	306	0.26053	0.258925	0.259596	0.26386	0.258337	0.270979	0.279217	0.271879	0.267228	0.282703	0.272301	0.268099	0.24658	0.273665	0.265487	0.269598	0.283243	0.252079	0.254	0.253852	0.252577	0.252589	0.252621	0.256114	0.256457	0.261156	0.256899	0.252174	0.24951	0.259489	0.247811	0.255665	0.261637	0.265928	0.263423	0.261403	0.264771	0.262312	0.258317	0.253985	0.24688	0.248726	0.249062	0.251843	0.243204	0.253119	0.249546	0.247792
119	307	0.25836	0.255451	0.25857	0.262132	0.258087	0.269849	0.277889	0.267191	0.26676	0.281959	0.27096	0.26699	0.24541	0.272322	0.267264	0.267329	0.283534	0.249803	0.251294	0.253158	0.251012	0.251495	0.25052	0.253551	0.253675	0.259608	0.257346	0.255124	0.250363	0.260522	0.24903	0.259503	0.261807	0.264219	0.261313	0.264106	0.26651	0.263047	0.258421	0.255688	0.244363	0.246724	0.247577	0.250765	0.239367	0.251537	0.245832	0.240278
120	309	0.234964	0.238454	0.200081	0.211499	0.233148	0.23751	0.225169	0.238143	0.234851	0.256559	0.239723	0.229662	0.244673	0.255177	0.235759	0.238388	0.255639	0.241356	0.228323	0.250086	0.250065	0.245489	0.249867	0.25525	0.250337	0.237116	0.250118	0.252907	0.23537	0.250323	0.253205	0.247759	0.225003	0.223543	0.264451	0.225773	0.189703	0.224665	0.218919	0.217457	0.251629	0.25371	0.249193	0.255461	0.241643	0.254126	0.24744	0.240701
121	31	0.252152	0.251807	0.250278	0.255471	0.251313	0.241402	0.270031	0.266684	0.240067	0.267554	0.268678	0.263761	0.250801	0.262413	0.265369	0.266595	0.274529	0.247676	0.245367	0.214756	0.253286	0.241597	0.252809	0.239777	0.212248	0.254957	0.253591	0.255852	0.246028	0.256808	0.254941	0.256408	0.257754	0.259253	0.267629	0.25909	0.254817	0.256154	0.250277	0.250175	0.24919	0.253652	0.227888	0.233181	0.246596	0.232267	0.228936	0.245327
122	311	0.272151	0.268917	0.2724	0.277398	0.274124	0.283537	0.29023	0.284229	0.279939	0.294712	0.284801	0.281709	0.264184	0.286845	0.2827	0.281727	0.296399	0.266049	0.267283	0.268187	0.266664	0.263882	0.264004	0.269819	0.268755	0.271856	0.273252	0.268465	0.267556	0.272364	0.262036	0.271323	0.276023	0.280015	0.272892	0.27781	0.281193	0.277232	0.274545	0.27012	0.25959	0.262165	0.261345	0.265443	0.256232	0.266823	0.261488	0.259723
123	313	0.255343	0.255305	0.255403	0.261068	0.256961	0.267998	0.275882	0.266828	0.264771	0.27987	0.269582	0.266297	0.245114	0.270542	0.266245	0.266769	0.280576	0.247307	0.248998	0.254695	0.250911	0.249801	0.250997	0.254551	0.253428	0.256231	0.255905	0.253898	0.250565	0.2581	0.248378	0.25562	0.258972	0.263746	0.260965	0.262103	0.263304	0.261734	0.256906	0.256482	0.247768	0.245649	0.24694	0.25	0.236274	0.251257	0.247671	0.244382
124	314	0.254302	0.251955	0.255581	0.259669	0.255398	0.266066	0.272221	0.266661	0.261038	0.278699	0.268211	0.264192	0.247299	0.269788	0.265025	0.266275	0.280451	0.246781	0.249139	0.251926	0.249104	0.247594	0.245832	0.252611	0.250551	0.256736	0.256711	0.251458	0.244684	0.256107	0.24784	0.254092	0.260338	0.263704	0.259335	0.260858	0.263423	0.260335	0.256662	0.253434	0.244914	0.245647	0.243385	0.24649	0.236512	0.250981	0.241883	0.24095
125	316	0.246375	0.24773	0.208097	0.220209	0.244142	0.248906	0.227938	0.248631	0.242299	0.263305	0.247071	0.240466	0.256284	0.26618	0.241389	0.24596	0.261474	0.252638	0.238717	0.259463	0.260818	0.25935	0.261287	0.263072	0.259285	0.24783	0.258342	0.264675	0.249403	0.263469	0.265732	0.258407	0.234149	0.23348	0.275091	0.234634	0.197372	0.235131	0.228171	0.226641	0.261594	0.263213	0.258688	0.263338	0.25537	0.266376	0.259962	0.25319
126	318	0.239934	0.245727	0.217724	0.224955	0.240473	0.237391	0.238066	0.249674	0.233535	0.259897	0.251479	0.244605	0.247091	0.258198	0.245774	0.249897	0.260715	0.24639	0.23595	0.236141	0.252259	0.246181	0.252079	0.246858	0.233209	0.244885	0.251881	0.254826	0.240859	0.255723	0.255105	0.250429	0.240487	0.236604	0.265291	0.237459	0.215513	0.238687	0.231004	0.227767	0.250099	0.25081	0.23809	0.244403	0.244392	0.245723	0.23917	0.242196
127	319	0.248199	0.247956	0.2517	0.256242	0.249148	0.262893	0.270398	0.263561	0.25922	0.276695	0.264951	0.261281	0.243975	0.267995	0.262074	0.264808	0.277698	0.244837	0.241263	0.250809	0.245958	0.245069	0.245015	0.251669	0.249991	0.250557	0.250043	0.250684	0.241021	0.250155	0.24463	0.248026	0.256729	0.257403	0.257747	0.255642	0.257754	0.256378	0.249275	0.248037	0.243563	0.245478	0.244356	0.246074	0.239163	0.249906	0.2446	0.236094
128	320	0.253771	0.254649	0.239203	0.245636	0.250583	0.259847	0.257429	0.260325	0.258118	0.274943	0.259098	0.256233	0.250311	0.270744	0.25682	0.257184	0.272438	0.250044	0.247098	0.25702	0.255507	0.252881	0.250307	0.257169	0.256705	0.252158	0.257573	0.258196	0.251256	0.260286	0.255049	0.255062	0.25115	0.251972	0.2657	0.251528	0.239564	0.249274	0.245545	0.244357	0.253293	0.252635	0.253754	0.253809	0.239318	0.259127	0.252082	0.246253
129	323	0.242051	0.241784	0.244171	0.246902	0.243565	0.255465	0.262681	0.25702	0.251393	0.27143	0.257684	0.256536	0.238205	0.264388	0.254456	0.255816	0.271545	0.240601	0.235374	0.242988	0.240164	0.241063	0.241441	0.246416	0.240835	0.243394	0.240627	0.244211	0.231639	0.245128	0.239719	0.243455	0.249287	0.24809	0.25478	0.248153	0.247249	0.246848	0.242583	0.238943	0.240503	0.239795	0.236089	0.241661	0.228273	0.241616	0.239758	0.233562
130	326	0.244645	0.244623	0.248661	0.251504	0.243811	0.259897	0.265608	0.26072	0.255731	0.273587	0.261945	0.255903	0.239979	0.266162	0.258673	0.260084	0.273402	0.240939	0.23831	0.246748	0.242111	0.241501	0.245738	0.249857	0.246288	0.247414	0.24454	0.245331	0.236689	0.24933	0.239695	0.243889	0.252635	0.252662	0.254103	0.250367	0.25253	0.252995	0.245864	0.242638	0.236203	0.240841	0.240367	0.241857	0.228025	0.245601	0.237831	0.233944
131	327	0.256076	0.253798	0.254817	0.263378	0.25608	0.269055	0.276799	0.267886	0.266426	0.283015	0.269379	0.264841	0.24834	0.273482	0.268626	0.267728	0.281761	0.25039	0.25307	0.253156	0.249582	0.249696	0.247736	0.256143	0.254641	0.259971	0.255907	0.253764	0.252259	0.257617	0.24798	0.257408	0.260231	0.263322	0.261549	0.262275	0.266524	0.261454	0.258011	0.253667	0.24601	0.249873	0.250852	0.250506	0.239006	0.251856	0.247532	0.240733
132	328	0.25	0.250308	0.222077	0.225005	0.243258	0.253172	0.243997	0.250388	0.25118	0.267815	0.253041	0.245441	0.254323	0.267309	0.248533	0.250724	0.267371	0.248672	0.239458	0.259799	0.256877	0.256358	0.259269	0.262901	0.259954	0.249948	0.257401	0.263043	0.249725	0.258651	0.260191	0.257274	0.242407	0.238017	0.269386	0.239567	0.21418	0.238911	0.23311	0.233569	0.258177	0.259724	0.255858	0.262312	0.24759	0.264033	0.256434	0.251185
133	329	0.255605	0.254379	0.238401	0.244	0.252466	0.260385	0.257094	0.257281	0.256193	0.273777	0.260529	0.255235	0.251841	0.269459	0.256607	0.257227	0.27483	0.252266	0.247478	0.257145	0.254415	0.253837	0.253871	0.259537	0.25836	0.25475	0.25859	0.259	0.25107	0.260832	0.257118	0.256598	0.250477	0.249823	0.266681	0.249787	0.236717	0.249684	0.245452	0.240824	0.255735	0.256101	0.253576	0.256782	0.242959	0.260798	0.254513	0.248964
134	33	0.254319	0.254701	0.251381	0.256243	0.25442	0.243772	0.269561	0.267864	0.240882	0.268847	0.270586	0.263267	0.250669	0.264172	0.266378	0.266016	0.275676	0.25056	0.247181	0.21572	0.255609	0.245659	0.253776	0.239239	0.214884	0.255954	0.255089	0.256247	0.250819	0.258458	0.255633	0.257126	0.259362	0.260064	0.267327	0.258519	0.254973	0.257975	0.254577	0.250793	0.252002	0.256703	0.231428	0.235355	0.248096	0.232205	0.230961	0.24791
135	331	0.256321	0.253326	0.260047	0.264716	0.25512	0.270837	0.276915	0.268368	0.267291	0.282732	0.269708	0.268535	0.249046	0.274335	0.267484	0.269534	0.283268	0.249437	0.250818	0.25923	0.252245	0.251867	0.251618	0.260109	0.257692	0.257326	0.260473	0.258549	0.24998	0.262194	0.255175	0.259549	0.266606	0.264824	0.261106	0.262947	0.263899	0.262889	0.259539	0.257649	0.251744	0.253235	0.252933	0.255942	0.243942	0.25888	0.253615	0.242737
136	333	0.259599	0.258619	0.262608	0.267327	0.260782	0.269173	0.281039	0.272422	0.265617	0.283294	0.273439	0.271175	0.252182	0.2752	0.271805	0.274318	0.285012	0.252156	0.252834	0.251905	0.254271	0.2539	0.253405	0.259084	0.25006	0.262342	0.262696	0.260571	0.251864	0.264321	0.257023	0.260546	0.268371	0.267142	0.266915	0.267552	0.269896	0.266434	0.262514	0.25768	0.254153	0.25547	0.24976	0.253452	0.248037	0.254788	0.249565	0.246804
137	34	0.254643	0.255917	0.252435	0.25706	0.252522	0.245496	0.271606	0.268277	0.242611	0.268389	0.270256	0.265094	0.251405	0.264148	0.26774	0.267789	0.27633	0.251651	0.25069	0.215127	0.254204	0.244786	0.254211	0.240236	0.216395	0.255582	0.257034	0.257464	0.249439	0.259469	0.254706	0.258155	0.260327	0.261935	0.268574	0.261658	0.258487	0.259102	0.255064	0.253006	0.252569	0.25213	0.230511	0.234312	0.248417	0.235972	0.2348	0.246851
138	340	0.20984	0.217594	0.164059	0.175975	0.204368	0.208051	0.175884	0.212716	0.20783	0.237179	0.214307	0.201461	0.240367	0.236455	0.203118	0.208487	0.225389	0.232027	0.201889	0.241896	0.243201	0.242834	0.250229	0.249796	0.239063	0.223375	0.236464	0.242848	0.226981	0.239448	0.253036	0.235368	0.199367	0.189152	0.263008	0.192758	0.13178	0.195813	0.186286	0.183578	0.24744	0.249591	0.237868	0.246779	0.238543	0.248505	0.238922	0.238165
139	343	0.216545	0.230337	0.165329	0.17545	0.216493	0.210388	0.172784	0.215354	0.207755	0.238223	0.216453	0.206688	0.25086	0.24523	0.205766	0.211102	0.231057	0.241439	0.21341	0.248324	0.25574	0.253991	0.263948	0.25952	0.250228	0.229636	0.249971	0.257886	0.235001	0.247708	0.265285	0.246501	0.201911	0.191282	0.272081	0.197779	0.1284	0.201648	0.188545	0.190444	0.25934	0.26223	0.25176	0.256736	0.252662	0.262226	0.254241	0.248082
140	35	0.251474	0.253947	0.251367	0.255328	0.253698	0.243011	0.269902	0.268774	0.24316	0.269345	0.270871	0.264058	0.253541	0.264696	0.265745	0.267081	0.275149	0.251607	0.248701	0.21677	0.255878	0.245223	0.255125	0.242824	0.216228	0.254994	0.257409	0.257007	0.248296	0.259566	0.255941	0.257992	0.259602	0.26033	0.268542	0.260089	0.256426	0.258925	0.25431	0.252164	0.253421	0.254884	0.232743	0.236451	0.249182	0.236137	0.232007	0.246466
141	350	0.25363	0.253923	0.25198	0.257417	0.253585	0.244748	0.270662	0.268296	0.242928	0.271391	0.27088	0.264284	0.251498	0.266787	0.265229	0.267045	0.275938	0.248766	0.248747	0.217519	0.255026	0.244998	0.254144	0.241177	0.215975	0.255567	0.256459	0.257145	0.24998	0.258801	0.256425	0.256842	0.260689	0.261395	0.270022	0.25975	0.256546	0.260084	0.253723	0.253072	0.251184	0.253347	0.231337	0.235767	0.24702	0.236815	0.23107	0.248967
142	353	0.252827	0.252712	0.253355	0.256955	0.24999	0.264932	0.272319	0.267105	0.261798	0.278818	0.270943	0.263234	0.245756	0.273152	0.265137	0.264919	0.28156	0.249551	0.248348	0.253299	0.249337	0.248817	0.246756	0.252725	0.253908	0.25472	0.252013	0.251248	0.241939	0.251748	0.250986	0.251063	0.258102	0.257689	0.260438	0.259366	0.258563	0.257222	0.252436	0.251032	0.248104	0.251125	0.249328	0.251709	0.239604	0.25498	0.247997	0.241237
143	354	0.252162	0.25541	0.252972	0.258094	0.253883	0.245699	0.271742	0.26978	0.243158	0.271108	0.271305	0.26457	0.249781	0.266211	0.267659	0.266336	0.276187	0.251596	0.248411	0.216563	0.255047	0.245072	0.254976	0.241505	0.21466	0.254992	0.256965	0.257816	0.250373	0.258565	0.255803	0.258167	0.259446	0.260692	0.267593	0.260316	0.257289	0.259685	0.253639	0.253277	0.252791	0.254176	0.230587	0.236566	0.248476	0.236964	0.233348	0.247131
144	357	0.255839	0.256716	0.230205	0.235154	0.2538	0.245975	0.224446	0.244188	0.245538	0.263249	0.24283	0.239258	0.263869	0.266566	0.240729	0.238904	0.259494	0.259682	0.247893	0.268098	0.263984	0.265125	0.268299	0.269349	0.267896	0.258507	0.268061	0.270929	0.257825	0.268235	0.27054	0.265971	0.247921	0.243488	0.277993	0.246595	0.217567	0.247493	0.240639	0.240073	0.267403	0.269508	0.264747	0.269312	0.256986	0.272611	0.267657	0.257991
145	361	0.258259	0.253801	0.25873	0.261921	0.259027	0.270287	0.276045	0.269473	0.267182	0.280487	0.267819	0.264655	0.247574	0.272571	0.265274	0.267987	0.28277	0.248954	0.253176	0.255343	0.2524	0.247307	0.244993	0.255678	0.253604	0.257949	0.257886	0.255043	0.249346	0.258423	0.249502	0.257474	0.262312	0.263069	0.260481	0.262495	0.264344	0.261474	0.257816	0.256074	0.250466	0.24961	0.253595	0.253765	0.237742	0.255333	0.248703	0.243985
146	362	0.243651	0.247968	0.211328	0.221201	0.240606	0.249006	0.231207	0.251138	0.24337	0.26571	0.249741	0.243052	0.259181	0.271001	0.244819	0.247962	0.265316	0.253001	0.24057	0.26247	0.260734	0.258539	0.262046	0.263653	0.260138	0.249086	0.255619	0.259468	0.244825	0.254578	0.26778	0.251722	0.23397	0.225758	0.277217	0.229862	0.193643	0.234486	0.224739	0.225156	0.264896	0.265393	0.261084	0.263598	0.257439	0.269935	0.261601	0.256221
147	364	0.253684	0.249956	0.257175	0.26091	0.255225	0.266764	0.275528	0.266964	0.263413	0.279841	0.269295	0.263193	0.2489	0.270492	0.263771	0.265	0.281283	0.248476	0.245599	0.252275	0.249153	0.244431	0.240647	0.250967	0.251436	0.252665	0.256101	0.251161	0.244532	0.254686	0.247336	0.253709	0.261745	0.262887	0.26216	0.261401	0.262975	0.259416	0.253689	0.252859	0.247147	0.248887	0.246526	0.247634	0.240784	0.251367	0.244997	0.239907
148	365	0.247407	0.250981	0.223351	0.231026	0.24613	0.238227	0.217894	0.235888	0.236539	0.253355	0.238248	0.226015	0.256969	0.259098	0.223784	0.230565	0.24845	0.253696	0.243955	0.262283	0.259701	0.257923	0.262313	0.264708	0.262664	0.252068	0.263574	0.267216	0.255137	0.26587	0.266424	0.262575	0.243673	0.238542	0.27499	0.241075	0.209713	0.242445	0.234104	0.234778	0.26236	0.262955	0.259432	0.263509	0.252635	0.26866	0.259208	0.252198
149	367	0.225671	0.235038	0.178519	0.191169	0.224823	0.225508	0.198217	0.228612	0.221737	0.246532	0.228708	0.218494	0.248892	0.251869	0.221713	0.2242	0.246064	0.239984	0.219481	0.25093	0.252968	0.250439	0.255869	0.255522	0.2491	0.231963	0.248197	0.253497	0.236644	0.24998	0.260085	0.244785	0.205778	0.198065	0.269578	0.202672	0.146116	0.204799	0.195836	0.193381	0.256281	0.256323	0.24895	0.254199	0.246654	0.257771	0.250997	0.246236
150	370	0.253789	0.25151	0.25676	0.26015	0.252776	0.268238	0.273596	0.267658	0.263732	0.280856	0.268958	0.26515	0.24883	0.272635	0.265573	0.266196	0.280019	0.248663	0.24698	0.253029	0.248351	0.247336	0.247012	0.253708	0.251138	0.253084	0.256308	0.255236	0.246951	0.25933	0.249381	0.256862	0.259861	0.262105	0.26102	0.260807	0.260934	0.262869	0.255734	0.25418	0.249106	0.249711	0.247018	0.251211	0.239573	0.255475	0.247619	0.241942
151	372	0.239075	0.245156	0.244988	0.252132	0.239236	0.263746	0.262974	0.267676	0.260779	0.282187	0.269112	0.264126	0.252681	0.278657	0.265907	0.265187	0.28255	0.254548	0.234199	0.261758	0.256364	0.262896	0.268309	0.268246	0.261969	0.246484	0.250034	0.260213	0.238181	0.251412	0.268245	0.245879	0.258803	0.250824	0.274508	0.25562	0.242862	0.257847	0.246812	0.247632	0.26416	0.264556	0.260103	0.264062	0.257036	0.267959	0.261638	0.253709
152	374	0.249873	0.247518	0.248783	0.256754	0.247633	0.26544	0.270886	0.263996	0.261707	0.277664	0.263436	0.259523	0.244461	0.271626	0.260469	0.264042	0.278838	0.247484	0.240238	0.253532	0.247062	0.249788	0.250757	0.254497	0.254537	0.253195	0.250948	0.250078	0.244791	0.254055	0.249948	0.250675	0.256993	0.256473	0.263084	0.257673	0.255164	0.256753	0.252686	0.247848	0.247326	0.248096	0.249493	0.253205	0.23848	0.257858	0.250415	0.240853
153	375	0.254556	0.251074	0.254918	0.258392	0.252094	0.266916	0.271543	0.26284	0.261537	0.277995	0.263986	0.26185	0.245843	0.270237	0.260405	0.263225	0.277914	0.247615	0.247604	0.255233	0.249427	0.246141	0.246309	0.253716	0.253212	0.25543	0.254872	0.252831	0.243879	0.253455	0.25045	0.24994	0.259891	0.259594	0.259021	0.260474	0.260506	0.259596	0.253131	0.250779	0.245011	0.247946	0.246282	0.250588	0.236393	0.25418	0.247702	0.241924
154	376	0.257502	0.252743	0.259799	0.261877	0.256623	0.269208	0.278422	0.267567	0.2663	0.281133	0.268531	0.263606	0.250062	0.271737	0.264241	0.266347	0.282352	0.247132	0.249101	0.258209	0.251168	0.248377	0.246623	0.254308	0.255416	0.256158	0.256759	0.256381	0.244785	0.259951	0.249814	0.25453	0.262682	0.264572	0.262561	0.263677	0.265705	0.263742	0.259464	0.254187	0.246433	0.250382	0.249663	0.25278	0.23454	0.254252	0.249437	0.242882
155	377	0.253522	0.256755	0.227111	0.234744	0.251797	0.242234	0.219948	0.239685	0.238697	0.259272	0.240851	0.236284	0.264418	0.264949	0.236121	0.239607	0.256202	0.259441	0.248233	0.266363	0.266485	0.264896	0.26709	0.270334	0.266174	0.257828	0.264025	0.267336	0.253683	0.266078	0.271113	0.26299	0.247443	0.242807	0.279318	0.243756	0.216352	0.245915	0.238143	0.237431	0.263849	0.266491	0.263236	0.267545	0.257809	0.271201	0.263867	0.258604
156	378	0.26212	0.255345	0.258581	0.265204	0.259185	0.27261	0.278365	0.267466	0.267426	0.282905	0.268159	0.267243	0.249154	0.274682	0.268138	0.26972	0.2837	0.250947	0.254569	0.257015	0.247507	0.251066	0.248052	0.256167	0.258737	0.256824	0.258386	0.256491	0.252578	0.259755	0.252465	0.257407	0.263925	0.264255	0.26004	0.264859	0.26719	0.264991	0.259466	0.256313	0.249707	0.252439	0.252018	0.253122	0.237596	0.254653	0.249412	0.241987
157	379	0.254938	0.25405	0.256382	0.263391	0.25506	0.268983	0.276397	0.267158	0.265606	0.277355	0.266679	0.260671	0.246734	0.269447	0.262602	0.265956	0.279226	0.244122	0.251821	0.253944	0.245473	0.248034	0.243284	0.252581	0.254866	0.256837	0.254663	0.252825	0.246853	0.258094	0.2485	0.256049	0.261519	0.263307	0.258433	0.260972	0.26373	0.261202	0.254492	0.252273	0.245787	0.248072	0.249434	0.251372	0.231681	0.252574	0.249111	0.237994
158	38	0.232516	0.24026	0.177485	0.185892	0.228949	0.227755	0.195054	0.233212	0.225693	0.250838	0.231916	0.22179	0.257685	0.25833	0.224795	0.228617	0.249816	0.251084	0.224342	0.259231	0.261509	0.260532	0.270316	0.267393	0.259964	0.240985	0.257493	0.26404	0.244383	0.258811	0.271017	0.255629	0.214024	0.206992	0.279204	0.212881	0.149966	0.212977	0.203293	0.204582	0.267648	0.268816	0.25944	0.264899	0.259372	0.269789	0.262458	0.256432
159	380	0.262769	0.257416	0.263268	0.267027	0.262673	0.275456	0.280213	0.266433	0.272132	0.283392	0.266772	0.265785	0.248277	0.275371	0.268107	0.270772	0.283959	0.252517	0.258066	0.261188	0.252407	0.251736	0.249239	0.258535	0.260406	0.260157	0.263238	0.261586	0.257268	0.2678	0.250334	0.260505	0.268218	0.269035	0.260382	0.267415	0.273186	0.267219	0.264779	0.260315	0.249899	0.249832	0.252025	0.256426	0.239836	0.259653	0.25368	0.244673
160	381	0.259145	0.255874	0.257301	0.263267	0.25706	0.268591	0.277063	0.268754	0.265283	0.283242	0.268322	0.265798	0.24897	0.275003	0.268677	0.268144	0.282457	0.252752	0.254398	0.256078	0.251496	0.252052	0.250285	0.254399	0.255242	0.259324	0.257942	0.256186	0.248778	0.259867	0.251518	0.258276	0.26532	0.264111	0.2636	0.264715	0.26629	0.264558	0.25835	0.256312	0.250017	0.250912	0.24979	0.254101	0.238243	0.254278	0.251914	0.245185
161	382	0.250851	0.248847	0.251993	0.256391	0.248572	0.264788	0.269945	0.26424	0.259728	0.276915	0.266133	0.261077	0.242839	0.27198	0.260529	0.263367	0.278232	0.245998	0.24555	0.251117	0.244933	0.245862	0.244976	0.253213	0.252003	0.252044	0.253235	0.249397	0.244652	0.251577	0.24963	0.250919	0.257528	0.258546	0.258845	0.256975	0.254971	0.255455	0.252232	0.247018	0.248272	0.248955	0.247418	0.250443	0.237263	0.254767	0.248687	0.240363
162	383	0.248315	0.248676	0.250922	0.255031	0.248852	0.26506	0.268642	0.267991	0.261529	0.279782	0.268463	0.26414	0.244235	0.276102	0.263996	0.266543	0.281024	0.249322	0.243086	0.253683	0.249164	0.25221	0.250147	0.256284	0.25252	0.251514	0.252431	0.255246	0.243777	0.25479	0.256039	0.25207	0.259021	0.258633	0.264906	0.259467	0.254897	0.259274	0.252866	0.249703	0.252497	0.253302	0.250906	0.255182	0.243145	0.257748	0.252214	0.243078
163	385	0.254157	0.25262	0.244618	0.24805	0.252345	0.256991	0.246905	0.254209	0.254304	0.268359	0.254063	0.249101	0.251443	0.265083	0.247756	0.252538	0.26817	0.249341	0.243941	0.258989	0.253329	0.253523	0.251285	0.260137	0.259172	0.251417	0.259237	0.258866	0.247289	0.26215	0.254615	0.255807	0.254257	0.256006	0.265601	0.252665	0.240923	0.252933	0.247661	0.244069	0.252367	0.255388	0.254216	0.255099	0.238692	0.258878	0.253933	0.243975
164	386	0.260328	0.256712	0.260811	0.264789	0.258331	0.272503	0.27981	0.268403	0.27095	0.283451	0.267755	0.266532	0.25023	0.274548	0.265097	0.270574	0.283198	0.249767	0.252133	0.257596	0.251199	0.249385	0.248856	0.255449	0.256929	0.25803	0.258035	0.258754	0.2489	0.260412	0.252018	0.256653	0.263134	0.268197	0.260785	0.263461	0.267069	0.262806	0.260864	0.259964	0.247499	0.249492	0.251427	0.252357	0.237319	0.257954	0.250406	0.243502
165	387	0.258015	0.25568	0.259377	0.264383	0.258244	0.270037	0.276849	0.265198	0.2671	0.278757	0.26454	0.263313	0.246755	0.273023	0.264051	0.266054	0.28121	0.2466	0.250691	0.258467	0.248382	0.248227	0.245351	0.254265	0.257152	0.257068	0.259669	0.256517	0.250611	0.259629	0.24863	0.25736	0.264209	0.266955	0.259726	0.263327	0.267246	0.262448	0.258847	0.254966	0.246769	0.247487	0.249947	0.252296	0.234984	0.254998	0.248648	0.241816
166	388	0.255488	0.258486	0.253791	0.261374	0.257111	0.257067	0.276591	0.269822	0.255273	0.276761	0.271229	0.268426	0.253076	0.256386	0.269149	0.270316	0.279103	0.253795	0.249009	0.237504	0.254037	0.249866	0.255143	0.247257	0.238018	0.260873	0.25792	0.258792	0.251887	0.260923	0.254566	0.260091	0.262222	0.264576	0.26693	0.262189	0.262181	0.263336	0.25747	0.254424	0.247711	0.248159	0.238768	0.239011	0.241727	0.216164	0.236097	0.244709
167	389	0.261634	0.257575	0.26292	0.265787	0.259977	0.272541	0.279304	0.267843	0.269174	0.282238	0.265899	0.26544	0.248518	0.2743	0.263985	0.26964	0.28339	0.251538	0.253476	0.259872	0.249907	0.251016	0.244426	0.257829	0.260002	0.258657	0.26064	0.257325	0.249047	0.260702	0.252525	0.258602	0.265054	0.267229	0.261114	0.265475	0.268252	0.264109	0.261739	0.258455	0.251423	0.252104	0.256484	0.256298	0.234117	0.258778	0.2528	0.244238
168	390	0.210616	0.226666	0.157514	0.170258	0.215234	0.213067	0.181664	0.218775	0.210127	0.236193	0.217201	0.208405	0.246574	0.243174	0.209879	0.215746	0.232018	0.233663	0.207772	0.24441	0.249035	0.248819	0.25624	0.25464	0.243786	0.223897	0.240433	0.253228	0.231822	0.242344	0.257017	0.241634	0.1892	0.18429	0.265443	0.185288	0.114738	0.188604	0.177414	0.176776	0.251875	0.257977	0.2453	0.250106	0.246767	0.256074	0.249797	0.240987
169	391	0.256874	0.25439	0.257323	0.262152	0.256813	0.268198	0.275972	0.267454	0.265587	0.27906	0.267852	0.263419	0.242352	0.270741	0.263327	0.266523	0.281663	0.24693	0.249412	0.252703	0.24929	0.248785	0.246075	0.253058	0.253311	0.255964	0.25626	0.254501	0.245946	0.256657	0.249261	0.254555	0.260594	0.264588	0.260177	0.260121	0.263663	0.26062	0.255324	0.251854	0.248273	0.248105	0.248442	0.250943	0.235434	0.252998	0.247069	0.239886
170	393	0.255333	0.256997	0.247207	0.252698	0.257701	0.260281	0.258426	0.258077	0.258532	0.271976	0.25899	0.254778	0.256588	0.270491	0.251304	0.25596	0.273218	0.256483	0.251461	0.264222	0.257714	0.257378	0.258251	0.264462	0.264062	0.261193	0.260766	0.263368	0.253572	0.263263	0.260716	0.261553	0.257686	0.258346	0.271164	0.25831	0.247542	0.258181	0.252701	0.249415	0.256479	0.260172	0.256778	0.261207	0.246613	0.266606	0.257662	0.253851
171	395	0.258804	0.254121	0.26031	0.264383	0.258587	0.271461	0.279952	0.266186	0.268117	0.281035	0.267637	0.265546	0.249427	0.271824	0.265502	0.265859	0.281129	0.249162	0.250469	0.257819	0.249159	0.248458	0.244478	0.25496	0.255526	0.257323	0.259567	0.256121	0.251719	0.259653	0.249351	0.257737	0.265798	0.26653	0.260727	0.266089	0.266515	0.26312	0.257673	0.254481	0.246793	0.247844	0.251336	0.252425	0.235169	0.25593	0.251208	0.24227
172	398	0.250046	0.251772	0.228916	0.234146	0.245473	0.243978	0.225654	0.24197	0.238849	0.258957	0.241762	0.235872	0.256069	0.263464	0.239079	0.240255	0.258003	0.255419	0.246457	0.262546	0.260006	0.258918	0.262733	0.264751	0.260707	0.254188	0.262042	0.265148	0.254818	0.26417	0.26662	0.261752	0.245291	0.243081	0.274063	0.244699	0.215846	0.244779	0.238828	0.233409	0.260055	0.259738	0.257646	0.263155	0.251068	0.266471	0.259611	0.252918
173	399	0.257674	0.255107	0.261152	0.262766	0.258192	0.270405	0.275992	0.264894	0.268423	0.279703	0.268627	0.266304	0.246372	0.272324	0.26505	0.268976	0.283157	0.246478	0.254899	0.259656	0.250221	0.250228	0.247854	0.256239	0.258316	0.25828	0.25993	0.260231	0.249637	0.261981	0.251545	0.258988	0.263577	0.266642	0.260358	0.264071	0.267021	0.263133	0.26046	0.25547	0.248035	0.249586	0.250947	0.254673	0.237587	0.256128	0.249054	0.24533
174	40	0.264956	0.263698	0.264143	0.269668	0.267184	0.269037	0.284963	0.278031	0.26714	0.282843	0.276156	0.272316	0.257183	0.276445	0.274234	0.275592	0.286527	0.257894	0.258777	0.249814	0.25624	0.253505	0.256185	0.258722	0.24899	0.264673	0.266223	0.266306	0.261131	0.26858	0.261232	0.265329	0.270456	0.272066	0.269943	0.270273	0.272221	0.269079	0.265269	0.261379	0.258606	0.25871	0.251175	0.253619	0.250045	0.253857	0.250819	0.252101
175	400	0.249041	0.251556	0.254227	0.258931	0.251844	0.267941	0.273766	0.273781	0.265767	0.285093	0.273738	0.268901	0.251116	0.279946	0.267699	0.270455	0.284985	0.253739	0.245081	0.257715	0.256667	0.259116	0.257902	0.263784	0.259627	0.256718	0.254655	0.259541	0.24517	0.254711	0.26204	0.253494	0.263794	0.260552	0.268592	0.262245	0.258067	0.262799	0.255759	0.253244	0.258892	0.261416	0.256491	0.259396	0.25113	0.263315	0.255783	0.251638
176	401	0.249858	0.255691	0.214927	0.224199	0.248512	0.23359	0.197752	0.233155	0.231036	0.250399	0.231199	0.222887	0.267356	0.262459	0.220426	0.224048	0.243191	0.26416	0.245091	0.269678	0.268659	0.267169	0.274785	0.275637	0.269983	0.256255	0.267779	0.274345	0.256738	0.271033	0.276529	0.266709	0.240097	0.233625	0.285634	0.235876	0.195768	0.236863	0.230651	0.228405	0.273941	0.274354	0.268373	0.273134	0.263482	0.278775	0.269364	0.263394
177	402	0.260011	0.255951	0.257536	0.260015	0.257935	0.270521	0.2743	0.264906	0.267056	0.280202	0.268006	0.263059	0.250151	0.2724	0.2617	0.26611	0.279862	0.255752	0.250933	0.256447	0.250784	0.248858	0.245713	0.255377	0.256503	0.257426	0.258844	0.257224	0.249493	0.260399	0.252335	0.257054	0.26417	0.265101	0.262684	0.261132	0.26402	0.263181	0.257646	0.25472	0.248394	0.249601	0.247256	0.253443	0.236662	0.256941	0.250919	0.244772
178	404	0.253284	0.253212	0.239971	0.239697	0.253413	0.250746	0.240925	0.251476	0.248077	0.267425	0.251764	0.249187	0.25368	0.268722	0.247796	0.249277	0.265251	0.250963	0.248224	0.261961	0.253927	0.252933	0.253096	0.261263	0.259865	0.255149	0.262767	0.262064	0.255135	0.264435	0.257941	0.259063	0.253814	0.251468	0.268398	0.252871	0.236813	0.250257	0.245324	0.242751	0.257802	0.257584	0.256513	0.259967	0.241852	0.263356	0.256616	0.251621
179	406	0.250096	0.252867	0.226875	0.232714	0.24965	0.242313	0.221051	0.242938	0.239862	0.258031	0.241215	0.235468	0.261386	0.263233	0.236222	0.236616	0.256815	0.257138	0.246122	0.264455	0.264603	0.259259	0.263286	0.266787	0.264102	0.255152	0.264195	0.266466	0.252955	0.264434	0.266505	0.261894	0.243955	0.242146	0.274323	0.243917	0.215271	0.244364	0.237425	0.234328	0.263651	0.264987	0.260673	0.267268	0.253013	0.267899	0.259342	0.255399
180	407	0.249253	0.249271	0.247665	0.251064	0.247355	0.261548	0.268412	0.269592	0.258057	0.278457	0.2688	0.262551	0.246195	0.269635	0.263524	0.26468	0.277308	0.249629	0.242288	0.249457	0.249065	0.250303	0.250672	0.25189	0.249751	0.248441	0.249703	0.250084	0.243959	0.254209	0.250346	0.246317	0.256801	0.255632	0.26323	0.254683	0.253997	0.255181	0.249695	0.247957	0.249517	0.248122	0.246347	0.250319	0.240651	0.25143	0.24765	0.238864
181	410	0.243818	0.248557	0.247452	0.250933	0.246324	0.259887	0.266248	0.263163	0.256946	0.27611	0.265102	0.258138	0.241591	0.271066	0.260281	0.265738	0.275145	0.248112	0.242155	0.248915	0.244689	0.248892	0.249602	0.254204	0.249269	0.24895	0.246341	0.249201	0.239451	0.251227	0.252201	0.246729	0.25546	0.252671	0.259822	0.254065	0.253447	0.2541	0.247059	0.245681	0.249665	0.250343	0.246338	0.247736	0.240482	0.252494	0.246601	0.24042
182	411	0.260254	0.255765	0.260859	0.263041	0.256599	0.273043	0.279566	0.270701	0.269032	0.284641	0.26903	0.266202	0.250342	0.276954	0.26736	0.270344	0.284347	0.250687	0.254411	0.261261	0.252331	0.255147	0.249983	0.258646	0.258505	0.261276	0.258793	0.256709	0.251305	0.261186	0.2529	0.25836	0.265012	0.267571	0.264737	0.267167	0.26861	0.267397	0.261145	0.258386	0.249571	0.252069	0.252093	0.255817	0.237019	0.261859	0.254111	0.244657
183	413	0.251271	0.254597	0.24961	0.256071	0.251674	0.245901	0.268774	0.268893	0.24172	0.271614	0.271286	0.265248	0.251854	0.262203	0.264897	0.267001	0.275639	0.251757	0.245775	0.213599	0.254777	0.244392	0.254337	0.233896	0.213883	0.255316	0.255679	0.257061	0.248484	0.258205	0.258966	0.256921	0.260727	0.261414	0.268875	0.25922	0.255012	0.258658	0.254813	0.250954	0.255454	0.256093	0.233003	0.235716	0.247823	0.232537	0.235131	0.247814
184	414	0.245358	0.248259	0.246635	0.25284	0.245646	0.259189	0.266494	0.265019	0.25792	0.27729	0.268615	0.261389	0.2444	0.27174	0.262146	0.265176	0.277844	0.248887	0.241107	0.250456	0.246981	0.250606	0.253047	0.255233	0.250096	0.247172	0.248818	0.251738	0.238782	0.249836	0.253912	0.247018	0.256653	0.253706	0.263207	0.253291	0.253438	0.254405	0.248917	0.247968	0.249055	0.252464	0.248685	0.25121	0.24278	0.256055	0.247774	0.240936
185	415	0.249101	0.256506	0.21803	0.225695	0.250829	0.236631	0.204809	0.235761	0.231355	0.252196	0.235545	0.230134	0.264815	0.262975	0.227863	0.231619	0.248823	0.260918	0.246334	0.269189	0.270212	0.266732	0.272099	0.270991	0.267842	0.256805	0.264556	0.271156	0.254734	0.26747	0.27485	0.264785	0.241362	0.235892	0.282755	0.239372	0.200034	0.23798	0.233577	0.233568	0.270101	0.271937	0.266005	0.270779	0.260109	0.275794	0.26703	0.2622
186	419	0.263289	0.265952	0.240796	0.249196	0.262827	0.258738	0.239371	0.257977	0.255362	0.272127	0.256909	0.253888	0.271841	0.276639	0.253402	0.253884	0.270809	0.26732	0.258178	0.276482	0.276058	0.273167	0.276818	0.278388	0.276547	0.26911	0.278762	0.279882	0.268143	0.278351	0.27978	0.276278	0.259811	0.257645	0.287175	0.260146	0.23327	0.257247	0.252907	0.251379	0.274398	0.276197	0.274749	0.277565	0.264896	0.280557	0.27496	0.268325
187	42	0.264486	0.264726	0.264597	0.269804	0.265831	0.265747	0.284242	0.277793	0.263125	0.282645	0.278919	0.276204	0.258599	0.27758	0.276046	0.277866	0.286565	0.26086	0.258173	0.243482	0.262457	0.255683	0.260815	0.258643	0.243756	0.265271	0.267795	0.267632	0.262596	0.269705	0.264031	0.268633	0.272232	0.27229	0.273496	0.272669	0.271244	0.27079	0.266359	0.262827	0.261316	0.262513	0.250633	0.253617	0.252064	0.254834	0.249409	0.256056
188	420	0.257106	0.254687	0.249227	0.253126	0.25453	0.261245	0.262602	0.259418	0.258129	0.273267	0.25695	0.2536	0.251925	0.268437	0.254377	0.256376	0.27199	0.249919	0.253359	0.261729	0.254627	0.251284	0.251756	0.259891	0.2613	0.2558	0.259987	0.259813	0.250438	0.264094	0.255827	0.258788	0.258517	0.257768	0.262496	0.257897	0.249935	0.257029	0.251496	0.248682	0.252739	0.256499	0.254874	0.257271	0.242518	0.260159	0.254443	0.247736
189	422	0.249917	0.251875	0.249603	0.254255	0.250147	0.243489	0.26954	0.266682	0.242081	0.268462	0.270433	0.262936	0.251591	0.26347	0.264988	0.266027	0.274519	0.251124	0.243997	0.216022	0.255079	0.243627	0.25363	0.241064	0.215949	0.253584	0.255005	0.256471	0.248502	0.257799	0.256746	0.256421	0.257931	0.259708	0.268275	0.25813	0.253937	0.256956	0.253068	0.24971	0.253271	0.251589	0.231743	0.236132	0.248516	0.23627	0.232773	0.246652
190	424	0.258678	0.265311	0.224077	0.230968	0.256544	0.239097	0.206093	0.239875	0.236384	0.257038	0.238372	0.227077	0.274135	0.264691	0.227537	0.228086	0.249603	0.269132	0.256425	0.277125	0.277931	0.277614	0.282515	0.282989	0.277576	0.263846	0.277147	0.282984	0.265978	0.2772	0.284557	0.274598	0.24885	0.241958	0.293414	0.246019	0.204592	0.24731	0.240099	0.240321	0.280165	0.283547	0.275647	0.282579	0.272544	0.285556	0.278729	0.272033
191	425	0.257707	0.25461	0.258946	0.262228	0.260006	0.270191	0.276665	0.265577	0.267821	0.280373	0.266529	0.265377	0.248795	0.271589	0.263197	0.266822	0.282446	0.249248	0.252815	0.257727	0.251396	0.249138	0.247366	0.256515	0.256781	0.257573	0.260616	0.259378	0.25136	0.26245	0.252462	0.259707	0.263531	0.265258	0.257693	0.265296	0.267649	0.264691	0.260259	0.256512	0.24762	0.248074	0.25042	0.252613	0.23849	0.257786	0.247614	0.242678
192	426	0.251053	0.254456	0.227105	0.233235	0.249329	0.242456	0.220207	0.242515	0.239361	0.25787	0.241387	0.234367	0.262797	0.264752	0.237456	0.239447	0.257533	0.255205	0.245664	0.265213	0.262634	0.260157	0.26374	0.26635	0.265666	0.256113	0.263204	0.267336	0.252921	0.265995	0.267466	0.262669	0.243394	0.241562	0.275682	0.243821	0.215809	0.244489	0.238232	0.235875	0.263544	0.264851	0.262035	0.266348	0.254729	0.270571	0.263334	0.257022
193	427	0.256082	0.254189	0.254827	0.258164	0.256881	0.265977	0.268862	0.264382	0.260808	0.275429	0.26451	0.260332	0.250524	0.270712	0.261086	0.262774	0.278429	0.24785	0.251038	0.2583	0.253358	0.249067	0.24811	0.25519	0.258066	0.258633	0.262102	0.258984	0.253427	0.26251	0.254278	0.258537	0.261329	0.264448	0.264821	0.263185	0.25952	0.260786	0.257926	0.252896	0.252739	0.254105	0.252089	0.255178	0.23862	0.259337	0.253139	0.247324
194	428	0.252822	0.251546	0.253895	0.257345	0.251521	0.266123	0.271937	0.265411	0.262833	0.27706	0.266301	0.263589	0.245928	0.26965	0.262827	0.266038	0.279038	0.246675	0.246933	0.252131	0.251397	0.243719	0.245091	0.252215	0.252322	0.25432	0.255881	0.25151	0.244616	0.253423	0.249512	0.25333	0.257695	0.26222	0.259098	0.261087	0.259437	0.258809	0.254353	0.249024	0.247392	0.2507	0.247862	0.250747	0.239084	0.252846	0.246944	0.240532
195	430	0.25694	0.254486	0.259355	0.263869	0.256969	0.269673	0.274637	0.263665	0.266335	0.279677	0.264973	0.262881	0.249263	0.271793	0.261618	0.264446	0.278941	0.247675	0.252848	0.25811	0.250554	0.247088	0.242841	0.253353	0.257995	0.257653	0.259212	0.258643	0.251759	0.260789	0.250567	0.25817	0.263717	0.264983	0.260119	0.263185	0.265034	0.263445	0.259769	0.254795	0.248421	0.247491	0.249559	0.253329	0.235642	0.25499	0.251312	0.24528
196	431	0.265211	0.266796	0.252089	0.25919	0.265644	0.26655	0.255057	0.2622	0.262388	0.277608	0.262784	0.258681	0.270633	0.278473	0.25867	0.260786	0.27534	0.266852	0.261727	0.275838	0.27168	0.267041	0.270404	0.275595	0.274563	0.269224	0.275465	0.276666	0.265107	0.276868	0.273995	0.274224	0.265271	0.263225	0.28149	0.264025	0.24732	0.265365	0.258698	0.257681	0.270181	0.27138	0.269703	0.276212	0.258434	0.277015	0.271764	0.264468
197	432	0.244022	0.247233	0.21949	0.226269	0.243594	0.234472	0.209688	0.231969	0.231917	0.249825	0.234739	0.225997	0.253449	0.255307	0.226251	0.229526	0.248224	0.249336	0.239414	0.260002	0.257068	0.253903	0.260536	0.263698	0.259679	0.250444	0.258515	0.263769	0.244721	0.260644	0.261951	0.256849	0.240467	0.235449	0.272335	0.237634	0.205601	0.238684	0.229686	0.229765	0.256878	0.260269	0.254216	0.260211	0.247215	0.26496	0.25602	0.248044
198	433	0.245563	0.245687	0.217894	0.229602	0.241159	0.238159	0.214381	0.235647	0.234978	0.25393	0.236902	0.22348	0.255292	0.254863	0.226029	0.2306	0.248197	0.249107	0.238764	0.259333	0.256752	0.253684	0.2591	0.262283	0.259985	0.250564	0.261117	0.263318	0.250682	0.260911	0.26229	0.258443	0.240914	0.235207	0.271114	0.236976	0.206696	0.239876	0.227539	0.229243	0.259025	0.258886	0.254591	0.258576	0.246517	0.263268	0.255998	0.250258
199	438	0.256465	0.253571	0.254939	0.262588	0.255303	0.268661	0.274909	0.264196	0.263521	0.278507	0.266017	0.261914	0.242543	0.269254	0.264425	0.26795	0.279506	0.246355	0.250576	0.254786	0.245488	0.24567	0.24541	0.251797	0.254543	0.256128	0.258597	0.255322	0.249861	0.260551	0.248264	0.256949	0.260819	0.264048	0.257693	0.26363	0.266002	0.261535	0.256585	0.252739	0.244388	0.246243	0.248947	0.251561	0.231271	0.252225	0.245627	0.237286
200	439	0.257197	0.255904	0.258313	0.261572	0.257084	0.260184	0.276005	0.268312	0.257108	0.277516	0.270024	0.264888	0.250394	0.269645	0.266219	0.266486	0.278897	0.249956	0.252694	0.237597	0.251443	0.247588	0.253249	0.25048	0.236746	0.25817	0.256556	0.257522	0.252289	0.259732	0.252176	0.259441	0.261997	0.265168	0.262694	0.263033	0.263596	0.261437	0.25836	0.256487	0.247849	0.250327	0.240175	0.245056	0.243313	0.246502	0.242477	0.244784
201	44	0.265352	0.260543	0.266572	0.270271	0.266009	0.277312	0.286296	0.273619	0.275393	0.285036	0.271155	0.270097	0.255556	0.2773	0.271436	0.275019	0.290279	0.254333	0.259283	0.265838	0.255332	0.254333	0.251608	0.262749	0.266106	0.264917	0.26515	0.264117	0.259159	0.267972	0.255744	0.265553	0.270815	0.272066	0.264582	0.271104	0.274452	0.270484	0.265862	0.261188	0.253741	0.256583	0.258514	0.261014	0.24395	0.263921	0.255502	0.246779
202	441	0.248105	0.242117	0.248875	0.251117	0.24459	0.260448	0.266242	0.257178	0.256377	0.268575	0.256511	0.250439	0.237143	0.262205	0.254267	0.257105	0.271294	0.236618	0.241344	0.248413	0.241843	0.236126	0.234629	0.246883	0.247911	0.246523	0.249229	0.249312	0.238573	0.252192	0.240519	0.248192	0.252894	0.254951	0.251783	0.252831	0.254603	0.254695	0.248778	0.244656	0.239025	0.243507	0.242107	0.244054	0.222597	0.247865	0.240533	0.230502
203	442	0.243448	0.247898	0.249037	0.253664	0.241216	0.249415	0.265354	0.26706	0.247733	0.27195	0.267782	0.263609	0.253002	0.266615	0.261384	0.264062	0.273418	0.246052	0.238946	0.228873	0.256278	0.247632	0.255582	0.241758	0.227216	0.246582	0.256267	0.258303	0.246074	0.258625	0.258983	0.254765	0.258698	0.258288	0.269614	0.259225	0.250168	0.256867	0.252149	0.251452	0.254321	0.254994	0.236831	0.242022	0.246484	0.24246	0.238698	0.248224
204	443	0.24895	0.252245	0.249687	0.257001	0.251604	0.242103	0.271203	0.267618	0.241882	0.268314	0.270506	0.264243	0.250829	0.262476	0.26719	0.265549	0.274238	0.249162	0.247277	0.214548	0.254447	0.244714	0.253297	0.237613	0.215239	0.254311	0.256215	0.256946	0.249119	0.259646	0.256521	0.256569	0.259696	0.260893	0.268244	0.260171	0.255448	0.258478	0.25317	0.250969	0.252642	0.252367	0.230739	0.234857	0.245907	0.231807	0.214595	0.245827
205	444	0.236016	0.247954	0.182382	0.193713	0.234222	0.210696	0.158272	0.213612	0.207138	0.234311	0.21299	0.203629	0.268545	0.2526	0.204235	0.205971	0.228772	0.259217	0.232747	0.266974	0.272146	0.271765	0.281724	0.278151	0.267953	0.246709	0.265174	0.275329	0.252265	0.265955	0.281692	0.262801	0.220344	0.209714	0.290058	0.216726	0.146684	0.218226	0.208338	0.209754	0.276143	0.279285	0.269439	0.276138	0.270115	0.280311	0.270666	0.268036
206	445	0.251073	0.249294	0.241871	0.25072	0.249955	0.257319	0.25729	0.25405	0.254646	0.271289	0.256701	0.252934	0.247516	0.268079	0.250603	0.254931	0.269193	0.248077	0.243581	0.256967	0.251698	0.249861	0.248249	0.257409	0.254412	0.251322	0.253412	0.253064	0.244544	0.257146	0.251711	0.251678	0.253346	0.252361	0.260889	0.251608	0.247382	0.251466	0.250992	0.248398	0.246319	0.24675	0.249463	0.250383	0.237897	0.256787	0.248456	0.242946
207	446	0.259249	0.255933	0.260996	0.264319	0.25438	0.273295	0.277909	0.269445	0.269481	0.280475	0.268535	0.266283	0.247898	0.273475	0.264718	0.265255	0.280029	0.247586	0.251468	0.257407	0.249457	0.246931	0.245418	0.256007	0.255512	0.258172	0.256936	0.254598	0.250819	0.262826	0.251806	0.258072	0.264694	0.267707	0.260128	0.26424	0.267526	0.264008	0.260188	0.255805	0.249049	0.24663	0.25163	0.25405	0.236543	0.256437	0.249555	0.242267
208	448	0.259585	0.257428	0.259123	0.263701	0.260176	0.270699	0.278324	0.269043	0.267331	0.281628	0.270613	0.268015	0.247892	0.272095	0.26539	0.269104	0.282403	0.248565	0.253833	0.256442	0.252173	0.250989	0.24783	0.255171	0.255467	0.257038	0.261247	0.25784	0.253009	0.263071	0.252021	0.259117	0.262901	0.267158	0.259265	0.265099	0.266328	0.263316	0.259082	0.256675	0.250665	0.250774	0.252825	0.252405	0.239125	0.255768	0.251477	0.245177
209	449	0.258014	0.254814	0.258348	0.264254	0.257074	0.269884	0.27411	0.2638	0.264526	0.279238	0.267477	0.264594	0.24864	0.271988	0.26372	0.265849	0.281998	0.251394	0.250309	0.257799	0.250685	0.250917	0.24593	0.255469	0.2563	0.257862	0.256699	0.255757	0.248155	0.258825	0.247774	0.25297	0.261217	0.265107	0.261133	0.26425	0.264416	0.263789	0.258993	0.255996	0.248277	0.249045	0.246963	0.253789	0.235888	0.254529	0.248877	0.242141
210	45	0.247685	0.247161	0.24857	0.252319	0.248064	0.252894	0.267067	0.261093	0.248862	0.268748	0.260541	0.254994	0.244291	0.262171	0.257796	0.261763	0.272171	0.241161	0.24403	0.233522	0.246096	0.241433	0.246075	0.245249	0.233452	0.247865	0.251328	0.252255	0.242842	0.252448	0.247506	0.251812	0.25662	0.255609	0.257417	0.255243	0.253164	0.255172	0.248641	0.246418	0.244416	0.245718	0.235484	0.239061	0.235319	0.24203	0.236918	0.236874
211	453	0.255686	0.251446	0.246653	0.253997	0.258117	0.265456	0.265483	0.261932	0.259729	0.275036	0.261459	0.257734	0.252588	0.270695	0.25619	0.262194	0.274536	0.249511	0.24728	0.258002	0.25219	0.252858	0.24763	0.255492	0.256829	0.254015	0.257466	0.25823	0.251587	0.26231	0.252864	0.257781	0.257697	0.261342	0.264189	0.258137	0.251885	0.257806	0.254163	0.2495	0.250043	0.253729	0.252012	0.255878	0.241255	0.259313	0.252131	0.244696
212	454	0.249343	0.250942	0.250041	0.254392	0.25	0.243721	0.267761	0.265153	0.241268	0.26797	0.267816	0.261528	0.248164	0.262609	0.262701	0.265437	0.273312	0.246406	0.244358	0.219298	0.251733	0.241071	0.252922	0.241231	0.215871	0.252804	0.251683	0.252969	0.244437	0.256389	0.254097	0.255072	0.256483	0.257596	0.263605	0.256472	0.254022	0.256605	0.250197	0.251564	0.24747	0.251124	0.228406	0.233575	0.243415	0.234005	0.230431	0.243038
213	455	0.253454	0.251259	0.256685	0.260625	0.252092	0.268033	0.274479	0.270876	0.262928	0.279568	0.272217	0.263923	0.25085	0.274595	0.266189	0.268505	0.283775	0.249965	0.248195	0.253712	0.253203	0.251607	0.252432	0.257835	0.255515	0.255354	0.25364	0.255716	0.242907	0.253748	0.255815	0.252847	0.260791	0.259283	0.267078	0.259929	0.259069	0.261	0.253433	0.25294	0.253609	0.255657	0.252688	0.255953	0.246392	0.257798	0.252027	0.244687
214	457	0.236609	0.237584	0.235923	0.240394	0.238167	0.250961	0.25002	0.254312	0.246756	0.267278	0.254262	0.247126	0.233465	0.263973	0.248841	0.250722	0.265474	0.240008	0.229046	0.244642	0.237239	0.241915	0.243883	0.248403	0.242759	0.240029	0.24602	0.24622	0.231549	0.246273	0.248541	0.242964	0.24444	0.246523	0.253352	0.240808	0.232971	0.245107	0.238238	0.232815	0.244024	0.243125	0.237365	0.242888	0.231454	0.247862	0.240106	0.233496
215	458	0.256877	0.254982	0.255473	0.26088	0.256951	0.267955	0.27267	0.264742	0.266238	0.279035	0.265683	0.263297	0.245934	0.270523	0.26508	0.26455	0.279704	0.246273	0.250224	0.25429	0.249297	0.248008	0.244509	0.252684	0.255342	0.256032	0.257941	0.253686	0.249271	0.258439	0.248722	0.255728	0.261715	0.261495	0.259366	0.259895	0.263187	0.262931	0.255931	0.253199	0.247475	0.24892	0.248289	0.251458	0.234915	0.252004	0.247442	0.239524
216	459	0.256056	0.258124	0.241334	0.247419	0.259304	0.255995	0.248116	0.254991	0.252467	0.27192	0.254482	0.250417	0.257995	0.268613	0.250605	0.25262	0.267203	0.254569	0.250154	0.264596	0.260442	0.259954	0.260014	0.264521	0.263741	0.256702	0.263359	0.265322	0.256859	0.268066	0.264379	0.263736	0.254201	0.251615	0.271378	0.253265	0.236486	0.254112	0.249595	0.247211	0.261461	0.262122	0.259147	0.262527	0.251117	0.266526	0.259936	0.253385
217	46	0.255878	0.258995	0.240469	0.24692	0.25533	0.251487	0.251566	0.25907	0.246867	0.268722	0.26188	0.253562	0.261383	0.269124	0.252991	0.255682	0.26834	0.260012	0.250523	0.249254	0.26388	0.259974	0.265088	0.26168	0.248866	0.262867	0.265617	0.266551	0.258588	0.266531	0.269747	0.267318	0.257053	0.254959	0.275936	0.25623	0.236521	0.253875	0.24878	0.24654	0.263826	0.265615	0.253224	0.257489	0.25737	0.25854	0.254998	0.256884
218	460	0.251746	0.255556	0.231048	0.238079	0.251144	0.244545	0.226856	0.245185	0.244027	0.261304	0.24187	0.237734	0.26261	0.267179	0.238585	0.23984	0.257384	0.256833	0.249279	0.268104	0.266626	0.262553	0.268473	0.269216	0.26661	0.259337	0.265571	0.270205	0.258146	0.2687	0.269521	0.264953	0.246281	0.241528	0.27907	0.245727	0.213991	0.245497	0.23983	0.237771	0.266638	0.268182	0.264652	0.26908	0.258092	0.272153	0.264944	0.260014
219	462	0.228827	0.237951	0.193156	0.201334	0.227345	0.232506	0.213823	0.236594	0.232057	0.253516	0.234846	0.227908	0.246636	0.257179	0.228146	0.230981	0.251079	0.24226	0.223501	0.252774	0.250133	0.250976	0.25176	0.254623	0.250292	0.23329	0.249216	0.254	0.238522	0.2487	0.254498	0.247729	0.220709	0.214882	0.265074	0.217624	0.177107	0.219416	0.207572	0.208118	0.252654	0.252761	0.247287	0.251969	0.241311	0.256205	0.246602	0.246745
220	463	0.254356	0.252738	0.255519	0.259459	0.251895	0.26724	0.273236	0.265813	0.262813	0.278981	0.268521	0.264409	0.245272	0.272535	0.2651	0.26586	0.281015	0.24867	0.24665	0.252065	0.249855	0.246029	0.246827	0.252607	0.25187	0.25588	0.255668	0.251214	0.244606	0.255746	0.249559	0.253458	0.259298	0.260038	0.261871	0.261825	0.260562	0.257849	0.253907	0.251466	0.249498	0.248783	0.247038	0.252581	0.24054	0.253488	0.247905	0.243861
221	465	0.250963	0.244506	0.241824	0.246434	0.249414	0.256663	0.250839	0.2525	0.250565	0.267713	0.253153	0.248432	0.245872	0.263377	0.250342	0.253092	0.26829	0.243414	0.246453	0.254034	0.250283	0.244559	0.243985	0.25245	0.253061	0.250216	0.257272	0.254446	0.24519	0.256336	0.249474	0.251338	0.252597	0.252506	0.259248	0.251501	0.242912	0.249344	0.24555	0.245853	0.246032	0.245478	0.245888	0.248451	0.234261	0.255075	0.245632	0.23849
222	466	0.255763	0.256784	0.229991	0.236503	0.254622	0.247942	0.226455	0.247512	0.244831	0.26402	0.247088	0.241088	0.26325	0.267549	0.242251	0.242573	0.259383	0.260389	0.251781	0.268434	0.264796	0.265531	0.265726	0.270764	0.268614	0.260279	0.267994	0.270639	0.257515	0.267692	0.270049	0.265861	0.248146	0.245626	0.278726	0.247278	0.22006	0.247693	0.24181	0.240108	0.267162	0.267831	0.265618	0.270178	0.260064	0.272898	0.265676	0.259971
223	467	0.257275	0.254451	0.262922	0.26606	0.258189	0.270327	0.279886	0.267495	0.269195	0.28321	0.26952	0.265145	0.250762	0.273634	0.268495	0.268514	0.285319	0.25218	0.253078	0.259022	0.250111	0.248619	0.246889	0.25413	0.257864	0.258827	0.259344	0.257267	0.249851	0.260721	0.250729	0.258037	0.264499	0.266579	0.260138	0.266074	0.269763	0.264195	0.260794	0.256701	0.248486	0.250306	0.251802	0.253714	0.238693	0.256215	0.249236	0.245804
224	468	0.238602	0.241018	0.24494	0.253418	0.233422	0.253851	0.262779	0.268434	0.250838	0.275297	0.267417	0.264296	0.257498	0.272582	0.26468	0.266478	0.276736	0.247274	0.231917	0.237346	0.260038	0.256092	0.262957	0.243989	0.237531	0.239875	0.258081	0.258993	0.248774	0.259913	0.264468	0.255317	0.259814	0.256455	0.273945	0.257476	0.246458	0.25826	0.251938	0.24914	0.259519	0.260253	0.246112	0.251731	0.255892	0.252605	0.247874	0.255575
225	469	0.25454	0.256238	0.253108	0.25733	0.255176	0.24765	0.271641	0.269601	0.244943	0.272637	0.274301	0.266533	0.253581	0.265956	0.267418	0.269421	0.27663	0.252422	0.249726	0.218412	0.256418	0.246057	0.258154	0.243386	0.217746	0.257298	0.256336	0.257816	0.250128	0.260875	0.25807	0.257623	0.261227	0.262199	0.268974	0.26057	0.256521	0.259871	0.254543	0.254809	0.253257	0.254584	0.234481	0.238695	0.248563	0.236833	0.235762	0.24743
226	47	0.25521	0.257905	0.239611	0.244737	0.254185	0.244414	0.243945	0.256088	0.24239	0.265041	0.257989	0.253772	0.258002	0.266599	0.252494	0.254578	0.266594	0.256464	0.250193	0.24448	0.261346	0.257652	0.26238	0.25857	0.244154	0.2595	0.262945	0.265956	0.255237	0.263174	0.266543	0.2625	0.256716	0.254306	0.273904	0.255287	0.239641	0.256863	0.248431	0.248861	0.25999	0.261085	0.249349	0.254175	0.25359	0.256244	0.250095	0.254496
227	470	0.23762	0.237833	0.247481	0.251846	0.234592	0.251946	0.263901	0.265904	0.250181	0.273846	0.268181	0.262577	0.249515	0.269424	0.262859	0.264182	0.275056	0.239139	0.230069	0.234387	0.25286	0.247537	0.253216	0.246461	0.23392	0.236918	0.25393	0.255242	0.243823	0.256325	0.256418	0.252276	0.256161	0.254687	0.26784	0.25489	0.249162	0.257474	0.250251	0.249506	0.25301	0.254015	0.240979	0.243697	0.245997	0.248403	0.241931	0.246125
228	48	0.251377	0.253952	0.239337	0.248219	0.253128	0.249957	0.243546	0.252837	0.243137	0.264832	0.252358	0.246965	0.256526	0.264962	0.248581	0.250859	0.265084	0.254435	0.249446	0.253512	0.259408	0.255691	0.260501	0.260332	0.251855	0.256218	0.259664	0.262499	0.252691	0.262015	0.263186	0.260118	0.251917	0.249318	0.272617	0.252034	0.235301	0.251401	0.245722	0.24274	0.259017	0.260226	0.252899	0.257987	0.250237	0.259107	0.251477	0.252584
229	480	0.264472	0.267779	0.264835	0.268748	0.266741	0.25896	0.283127	0.280514	0.255114	0.281703	0.284746	0.278842	0.266183	0.276165	0.278808	0.280484	0.287095	0.262457	0.259996	0.230538	0.269011	0.256276	0.26682	0.252742	0.229311	0.269306	0.268951	0.269314	0.261184	0.271863	0.268881	0.269079	0.273113	0.273169	0.280317	0.272939	0.269115	0.271943	0.26785	0.264117	0.266209	0.26666	0.24294	0.247663	0.260674	0.247139	0.245067	0.262082
230	484	0.244206	0.245993	0.220079	0.228766	0.242121	0.238009	0.219282	0.238415	0.234131	0.255496	0.239889	0.231517	0.253341	0.259737	0.235561	0.236136	0.2555	0.248065	0.239252	0.260231	0.256514	0.251992	0.256019	0.26079	0.257847	0.249723	0.259203	0.262038	0.24711	0.260512	0.262153	0.254033	0.239338	0.23607	0.273549	0.238031	0.207927	0.238419	0.232831	0.232124	0.259578	0.264021	0.255952	0.262951	0.249775	0.264474	0.25807	0.249481
231	485	0.263692	0.257637	0.264012	0.266912	0.262006	0.274666	0.278653	0.267768	0.27192	0.283667	0.268159	0.264909	0.24993	0.274318	0.268885	0.269934	0.285482	0.251277	0.255	0.26195	0.250236	0.25154	0.246719	0.258931	0.259976	0.261397	0.263033	0.259841	0.254322	0.263776	0.252308	0.261327	0.266083	0.269184	0.259874	0.267005	0.271488	0.267059	0.263811	0.258696	0.252149	0.252139	0.253765	0.255383	0.238765	0.258562	0.255346	0.242953
232	487	0.257389	0.253329	0.258725	0.262951	0.256902	0.270273	0.276929	0.270342	0.266906	0.284794	0.272981	0.267324	0.253174	0.275813	0.26986	0.270841	0.285121	0.251087	0.25002	0.257637	0.255128	0.254722	0.252981	0.259197	0.255815	0.258325	0.254448	0.255442	0.249803	0.258876	0.251095	0.255768	0.263681	0.264292	0.265412	0.263827	0.266113	0.264762	0.258594	0.255562	0.249755	0.252806	0.250459	0.252396	0.244243	0.2569	0.250914	0.247818
233	489	0.248521	0.250066	0.249267	0.252514	0.247724	0.262619	0.269124	0.265848	0.260186	0.279128	0.267758	0.263026	0.243146	0.271503	0.262587	0.264087	0.280554	0.247845	0.242014	0.249724	0.247811	0.24975	0.250658	0.25291	0.248099	0.250568	0.252539	0.253416	0.241771	0.254676	0.251835	0.247472	0.258077	0.256935	0.260915	0.256787	0.254766	0.256787	0.249887	0.251071	0.250463	0.252767	0.246608	0.24987	0.243001	0.254142	0.249291	0.239829
234	490	0.247816	0.249074	0.248114	0.254055	0.246983	0.261202	0.268721	0.267236	0.257823	0.279105	0.269281	0.261171	0.245571	0.27188	0.26255	0.263662	0.279076	0.249607	0.242421	0.248953	0.24774	0.252197	0.251447	0.255386	0.249151	0.251454	0.250232	0.250956	0.240521	0.253227	0.250767	0.249126	0.255311	0.255638	0.263247	0.256282	0.252723	0.254727	0.250562	0.248017	0.250608	0.253491	0.24709	0.251368	0.242059	0.255216	0.248357	0.240765
235	491	0.250839	0.250742	0.253446	0.25564	0.250463	0.265748	0.272774	0.268518	0.260958	0.280707	0.270068	0.264395	0.24878	0.272748	0.264793	0.269383	0.281926	0.249948	0.24405	0.25215	0.249392	0.251995	0.252151	0.255476	0.250963	0.251966	0.251849	0.254234	0.243924	0.254779	0.252003	0.248068	0.258993	0.259623	0.262682	0.258307	0.258503	0.260486	0.250686	0.252041	0.251194	0.25349	0.249613	0.253012	0.243923	0.256147	0.249794	0.242755
236	492	0.24834	0.251223	0.249917	0.252944	0.248779	0.264856	0.27204	0.268267	0.259781	0.279096	0.269137	0.264425	0.246373	0.272753	0.264272	0.265228	0.279349	0.247648	0.244999	0.251083	0.245878	0.250943	0.251349	0.254442	0.251671	0.252843	0.250017	0.250678	0.242204	0.253325	0.25183	0.248606	0.257472	0.258809	0.260983	0.258899	0.257395	0.254653	0.250747	0.248153	0.249183	0.251726	0.248436	0.250053	0.245638	0.254853	0.249722	0.23861
237	493	0.21875	0.222768	0.241059	0.247579	0.216523	0.261126	0.257286	0.260981	0.257356	0.27516	0.262169	0.257973	0.248909	0.272598	0.258944	0.256923	0.276304	0.225106	0.210163	0.255119	0.252637	0.253403	0.251838	0.25634	0.255478	0.224899	0.252197	0.255158	0.241746	0.254225	0.257814	0.251616	0.251592	0.248617	0.268197	0.252388	0.241522	0.249983	0.247646	0.244127	0.250798	0.255482	0.251748	0.255669	0.244742	0.259693	0.251069	0.245368
238	494	0.245815	0.253703	0.21255	0.219219	0.245597	0.237815	0.233776	0.254288	0.235955	0.263529	0.253869	0.247314	0.260694	0.266628	0.248308	0.249286	0.263041	0.256822	0.24206	0.243402	0.262886	0.259466	0.268128	0.259961	0.241951	0.251862	0.260615	0.264509	0.251536	0.262271	0.267954	0.261553	0.237934	0.232755	0.277666	0.235625	0.200238	0.234412	0.229182	0.229446	0.265784	0.265868	0.251191	0.254575	0.259943	0.25746	0.251453	0.257412
239	495	0.245065	0.250249	0.210064	0.218343	0.242829	0.246704	0.231585	0.24762	0.243155	0.265508	0.248755	0.24388	0.257603	0.269276	0.245463	0.246557	0.264852	0.251872	0.23972	0.260487	0.25935	0.261214	0.264653	0.265231	0.260822	0.247932	0.259624	0.261983	0.250109	0.25949	0.264254	0.256641	0.234939	0.228512	0.274313	0.234199	0.197466	0.232314	0.22752	0.225211	0.264521	0.264687	0.260748	0.263244	0.253741	0.266934	0.260016	0.255209
240	496	0.241346	0.24763	0.209313	0.217866	0.238934	0.244568	0.23119	0.245944	0.241783	0.262153	0.248515	0.242018	0.252865	0.266121	0.241658	0.243852	0.262078	0.249575	0.234499	0.254433	0.25438	0.254861	0.256819	0.260374	0.255925	0.245442	0.255408	0.257157	0.247578	0.258332	0.262115	0.254771	0.231968	0.227462	0.271405	0.23194	0.194904	0.228484	0.224438	0.223102	0.256122	0.259159	0.254989	0.260341	0.249711	0.2628	0.254993	0.250146
241	498	0.243343	0.249769	0.208174	0.217114	0.240449	0.246014	0.232773	0.247397	0.242934	0.265105	0.247222	0.242105	0.253927	0.265107	0.2422	0.245311	0.261303	0.249733	0.236877	0.257885	0.256224	0.258496	0.261774	0.263052	0.256612	0.246587	0.254169	0.258986	0.24616	0.256419	0.260581	0.253144	0.231091	0.226379	0.272744	0.229494	0.19599	0.231443	0.220836	0.223857	0.257571	0.258498	0.255109	0.257387	0.249141	0.26361	0.25447	0.248949
242	499	0.248703	0.250973	0.248479	0.254466	0.249682	0.246569	0.269152	0.267902	0.241682	0.269614	0.271397	0.262281	0.248695	0.264773	0.263814	0.267304	0.273628	0.249387	0.245878	0.217998	0.252773	0.245495	0.256235	0.241958	0.216719	0.252503	0.253883	0.256897	0.248371	0.257078	0.255876	0.254878	0.257415	0.257233	0.2681	0.256606	0.25273	0.258226	0.251644	0.249843	0.252521	0.253626	0.231878	0.236213	0.248166	0.236926	0.235963	0.245654
243	5	0.251742	0.248322	0.252562	0.258989	0.249754	0.266196	0.27297	0.264159	0.261721	0.278126	0.266164	0.262841	0.244395	0.267684	0.258839	0.263462	0.279494	0.246317	0.247463	0.254049	0.248273	0.244185	0.243385	0.252602	0.251717	0.255688	0.254864	0.252073	0.242379	0.256895	0.245687	0.250303	0.256927	0.260224	0.258133	0.256946	0.259921	0.258993	0.251828	0.250583	0.246002	0.247031	0.24771	0.251291	0.23274	0.251889	0.245513	0.236106
244	500	0.257117	0.256175	0.257364	0.2626	0.257131	0.268582	0.275346	0.269812	0.2648	0.280937	0.269558	0.267095	0.249269	0.268745	0.264492	0.268186	0.282051	0.250413	0.251646	0.256062	0.252769	0.252674	0.249461	0.25408	0.255547	0.255446	0.256473	0.253256	0.247625	0.257769	0.246849	0.255298	0.26168	0.263573	0.260429	0.262554	0.265047	0.26218	0.256959	0.255	0.241108	0.243456	0.247354	0.24736	0.238892	0.247433	0.242538	0.244552
245	503	0.239069	0.241301	0.237416	0.246078	0.240041	0.238274	0.260748	0.258849	0.235812	0.263237	0.263118	0.253242	0.245556	0.254742	0.257782	0.256967	0.266317	0.243665	0.234518	0.212799	0.249559	0.238007	0.250399	0.235891	0.210347	0.245161	0.25005	0.250358	0.238654	0.252572	0.249901	0.249939	0.249231	0.24972	0.26365	0.250455	0.243714	0.250495	0.244967	0.240631	0.245065	0.248892	0.228241	0.228151	0.24082	0.231544	0.225936	0.240872
246	504	0.252345	0.25147	0.255704	0.258661	0.253761	0.265465	0.27486	0.266782	0.261054	0.278143	0.269433	0.263323	0.243037	0.269936	0.265808	0.265648	0.281004	0.245717	0.249212	0.251084	0.24805	0.248076	0.244081	0.251814	0.24806	0.255198	0.253859	0.248852	0.245807	0.255954	0.244755	0.25248	0.258961	0.260168	0.25937	0.256987	0.26274	0.260647	0.254879	0.250462	0.243475	0.245132	0.24407	0.246413	0.235199	0.249248	0.243523	0.242278
247	505	0.251655	0.254137	0.252126	0.256033	0.253185	0.245271	0.267731	0.267868	0.244407	0.269585	0.270507	0.265116	0.252579	0.266472	0.265684	0.267598	0.274724	0.2498	0.246732	0.219282	0.254089	0.24852	0.256695	0.244818	0.217487	0.254892	0.254756	0.256711	0.248643	0.2575	0.25685	0.256442	0.258714	0.259656	0.269588	0.259156	0.254603	0.257493	0.252897	0.252684	0.253598	0.254056	0.232125	0.237412	0.248314	0.238658	0.236016	0.2485
248	506	0.239777	0.245185	0.23608	0.243368	0.241338	0.232344	0.258256	0.257753	0.234812	0.260857	0.260831	0.253861	0.244617	0.264284	0.255558	0.25598	0.263943	0.242168	0.233529	0.209181	0.248519	0.239126	0.248472	0.239493	0.211639	0.242537	0.245149	0.248365	0.235873	0.250576	0.251062	0.251768	0.248814	0.250197	0.260156	0.246529	0.240851	0.247844	0.241994	0.241913	0.243314	0.248327	0.223682	0.229093	0.238428	0.228929	0.225061	0.241138
249	507	0.241101	0.240432	0.241316	0.248096	0.23667	0.257296	0.261342	0.256983	0.254662	0.2709	0.258595	0.252806	0.242083	0.262732	0.25309	0.256167	0.271825	0.24107	0.232751	0.249627	0.244308	0.235645	0.239716	0.249141	0.248751	0.24284	0.239879	0.245907	0.227668	0.240947	0.249046	0.23878	0.250678	0.248446	0.258296	0.25054	0.246198	0.251802	0.240083	0.242296	0.243234	0.244662	0.241452	0.249833	0.231103	0.253279	0.24498	0.237793
250	508	0.245927	0.245468	0.250104	0.253776	0.246167	0.265501	0.267162	0.264323	0.261241	0.277153	0.263911	0.261498	0.244751	0.270016	0.260357	0.262914	0.280732	0.24676	0.243547	0.255069	0.248095	0.243907	0.243016	0.254059	0.254495	0.250477	0.243992	0.247757	0.231602	0.246815	0.252669	0.240692	0.257661	0.253515	0.262442	0.255679	0.253495	0.252161	0.249047	0.247551	0.249304	0.251828	0.248608	0.255926	0.237387	0.255641	0.251244	0.238659
251	509	0.253651	0.252624	0.256345	0.257344	0.252941	0.265469	0.275363	0.26854	0.261258	0.279617	0.267852	0.263999	0.244992	0.27128	0.26626	0.266612	0.278926	0.245804	0.249095	0.248655	0.249127	0.245316	0.246094	0.250681	0.24788	0.253536	0.254001	0.252919	0.24584	0.25468	0.248916	0.252803	0.259184	0.262265	0.260086	0.261181	0.261973	0.259662	0.253127	0.250422	0.246075	0.246195	0.244568	0.246494	0.237813	0.249371	0.245988	0.242665
252	51	0.249669	0.24862	0.24963	0.258127	0.250916	0.264564	0.27137	0.262182	0.260832	0.275305	0.261429	0.257762	0.24331	0.266442	0.258647	0.26137	0.276541	0.24361	0.245569	0.252678	0.246911	0.246156	0.246301	0.254013	0.25255	0.249796	0.253	0.254407	0.247064	0.256414	0.246469	0.252807	0.256611	0.257609	0.254784	0.257498	0.256571	0.257491	0.251168	0.249187	0.244065	0.248268	0.244514	0.248673	0.234249	0.250233	0.244758	0.237105
253	510	0.252898	0.247291	0.251229	0.257967	0.249978	0.262784	0.270341	0.261485	0.260031	0.27624	0.267648	0.260396	0.244313	0.267391	0.261661	0.26518	0.277476	0.24357	0.242702	0.250884	0.245992	0.24506	0.241201	0.249916	0.249068	0.253448	0.255983	0.252548	0.244827	0.254785	0.248492	0.251047	0.261149	0.260043	0.258543	0.257374	0.26052	0.258083	0.251827	0.251249	0.246062	0.246791	0.243457	0.248431	0.233914	0.249458	0.243295	0.237743
254	511	0.238048	0.246879	0.208567	0.2161	0.238632	0.242512	0.229794	0.245093	0.238461	0.262215	0.247479	0.238511	0.252345	0.261688	0.239061	0.241739	0.261559	0.247724	0.233016	0.254707	0.255047	0.254064	0.257548	0.262412	0.25433	0.246319	0.253709	0.25645	0.240631	0.255899	0.261209	0.249218	0.226872	0.22176	0.269449	0.225402	0.18673	0.223405	0.219689	0.214853	0.258939	0.258708	0.253856	0.256563	0.252077	0.262327	0.254956	0.248435
255	512	0.253776	0.252194	0.255737	0.261011	0.253024	0.268696	0.275695	0.270518	0.264801	0.281849	0.270721	0.267472	0.250193	0.274749	0.270083	0.268402	0.284554	0.251909	0.247564	0.253471	0.251887	0.251613	0.24795	0.254351	0.252585	0.257345	0.249357	0.252854	0.24181	0.254891	0.250327	0.24913	0.259362	0.260387	0.263081	0.258872	0.262612	0.256902	0.253335	0.252003	0.251045	0.25273	0.250202	0.252557	0.243132	0.254203	0.250963	0.246689
256	514	0.246096	0.248514	0.244909	0.251689	0.247651	0.238969	0.263922	0.261107	0.23808	0.264053	0.265821	0.258835	0.245667	0.256501	0.260313	0.260936	0.269522	0.243934	0.240932	0.218163	0.249369	0.239971	0.247698	0.237602	0.212627	0.249932	0.248663	0.251824	0.23984	0.252662	0.251047	0.249382	0.252862	0.256093	0.261416	0.252318	0.250203	0.252325	0.247618	0.245003	0.246394	0.246829	0.22558	0.230163	0.237792	0.232668	0.227003	0.241825
257	515	0.258993	0.256906	0.260606	0.264491	0.256921	0.272489	0.27823	0.271322	0.267324	0.284928	0.274067	0.268148	0.25205	0.276756	0.271012	0.272221	0.28587	0.253438	0.253744	0.257073	0.255085	0.255225	0.253248	0.258542	0.257622	0.260104	0.257051	0.252293	0.250108	0.259818	0.252919	0.256845	0.265174	0.265694	0.265276	0.262991	0.266819	0.265008	0.25871	0.257215	0.250277	0.252677	0.252352	0.253533	0.243902	0.257055	0.252785	0.247815
258	516	0.256012	0.255307	0.259791	0.260946	0.254807	0.270894	0.275934	0.268668	0.266868	0.282873	0.269821	0.265655	0.250363	0.271703	0.267195	0.267998	0.282387	0.249128	0.24617	0.257193	0.252941	0.251418	0.248564	0.257769	0.257212	0.256617	0.255779	0.250669	0.247964	0.257719	0.252875	0.254129	0.261471	0.262726	0.264819	0.262955	0.264519	0.262496	0.256619	0.254356	0.249268	0.249721	0.249063	0.251592	0.239242	0.253883	0.248656	0.244449
259	518	0.244256	0.245902	0.245795	0.25218	0.245171	0.260429	0.264941	0.258867	0.25724	0.271749	0.260337	0.255779	0.242433	0.266494	0.25667	0.257502	0.273058	0.237856	0.239459	0.245681	0.242078	0.239354	0.24264	0.247898	0.246743	0.246561	0.250914	0.246291	0.238655	0.251016	0.243541	0.247025	0.252475	0.252793	0.254709	0.251276	0.251376	0.252355	0.244682	0.245311	0.237155	0.241651	0.240015	0.242986	0.232679	0.247431	0.240508	0.232978
260	519	0.254851	0.25126	0.252651	0.257637	0.252883	0.265867	0.272256	0.262321	0.262682	0.278599	0.268224	0.261425	0.247596	0.270191	0.263386	0.264963	0.279975	0.248297	0.243927	0.249729	0.250759	0.246776	0.244572	0.254707	0.252079	0.255436	0.252561	0.248024	0.246535	0.253287	0.248761	0.250301	0.258813	0.258245	0.261036	0.257982	0.262368	0.259781	0.253157	0.250167	0.246331	0.244999	0.24471	0.247833	0.234259	0.251586	0.246492	0.243404
261	521	0.256697	0.258095	0.26087	0.263337	0.2565	0.269935	0.279032	0.269074	0.265357	0.282352	0.272175	0.266983	0.250643	0.275495	0.268297	0.271618	0.283104	0.250931	0.253185	0.255285	0.253121	0.252107	0.250035	0.25614	0.25497	0.258407	0.257016	0.252349	0.248876	0.258885	0.253863	0.255131	0.262812	0.263266	0.262092	0.26313	0.266094	0.262425	0.256911	0.256275	0.247186	0.247956	0.248729	0.25252	0.242212	0.256164	0.249327	0.24514
262	523	0.249396	0.248421	0.248707	0.255567	0.248265	0.262484	0.271613	0.263417	0.258197	0.274475	0.265167	0.25908	0.245064	0.265456	0.261796	0.261735	0.277053	0.245856	0.245422	0.24797	0.246719	0.245386	0.243723	0.252019	0.247451	0.252607	0.251054	0.24874	0.238947	0.25067	0.246493	0.248692	0.254355	0.254518	0.258692	0.253254	0.255729	0.254539	0.249369	0.247047	0.244629	0.244959	0.242403	0.245349	0.236237	0.249123	0.242712	0.240038
263	527	0.255941	0.255634	0.256319	0.259407	0.253931	0.268565	0.273724	0.266401	0.264913	0.281167	0.269828	0.262836	0.248419	0.273663	0.267334	0.266715	0.282382	0.248358	0.248773	0.254273	0.253088	0.252622	0.251328	0.255038	0.253948	0.254733	0.255829	0.253677	0.247342	0.256463	0.250638	0.253735	0.260029	0.262181	0.259602	0.259416	0.26326	0.259234	0.255305	0.251458	0.246874	0.247382	0.247641	0.251524	0.240966	0.254916	0.246242	0.243896
264	540	0.248878	0.25303	0.247791	0.255176	0.25072	0.24118	0.26774	0.267716	0.238336	0.269429	0.269308	0.263628	0.251551	0.259595	0.263552	0.266191	0.274012	0.248438	0.245614	0.211896	0.255142	0.243772	0.253851	0.227072	0.211264	0.253459	0.254777	0.256417	0.245613	0.258618	0.256883	0.25686	0.25819	0.258301	0.267468	0.257702	0.252931	0.255629	0.250382	0.249701	0.250867	0.253636	0.22712	0.234959	0.245611	0.227076	0.224512	0.24635
265	541	0.249036	0.250815	0.247482	0.252004	0.251701	0.241028	0.264358	0.265151	0.236572	0.265183	0.267926	0.261518	0.248818	0.262165	0.262231	0.263014	0.27274	0.247304	0.243298	0.214878	0.253238	0.241275	0.252062	0.238606	0.21288	0.252585	0.25355	0.254976	0.24312	0.255752	0.253768	0.25376	0.256464	0.257322	0.266214	0.25647	0.250714	0.254377	0.248946	0.24684	0.249222	0.251722	0.229123	0.234277	0.243121	0.232841	0.227713	0.244461
266	542	0.244964	0.247988	0.241654	0.250602	0.246243	0.237007	0.264224	0.261827	0.236367	0.264658	0.264614	0.259907	0.247169	0.259833	0.259788	0.262222	0.269432	0.245701	0.2416	0.213776	0.249473	0.239758	0.250583	0.229085	0.211599	0.250122	0.251531	0.25543	0.242358	0.256123	0.252477	0.254201	0.250291	0.254604	0.263916	0.254665	0.247731	0.252896	0.244206	0.244942	0.247228	0.249703	0.223412	0.232169	0.243844	0.227722	0.222759	0.242078
267	543	0.249774	0.251013	0.248297	0.252957	0.249233	0.243815	0.265951	0.265219	0.240923	0.268323	0.267303	0.261675	0.249883	0.262313	0.264814	0.264925	0.271946	0.247641	0.245147	0.216291	0.253644	0.243934	0.255396	0.240976	0.21303	0.253266	0.255194	0.255583	0.246245	0.259472	0.256283	0.256358	0.256011	0.258108	0.2657	0.256015	0.249873	0.255768	0.248868	0.248364	0.251456	0.254355	0.229108	0.237417	0.246738	0.235982	0.229997	0.245032
268	544	0.250743	0.249161	0.2503	0.257809	0.247485	0.263733	0.270004	0.259474	0.261546	0.274254	0.260928	0.254364	0.242791	0.266238	0.25993	0.260203	0.276104	0.242032	0.243614	0.250037	0.244842	0.235997	0.236897	0.249651	0.251215	0.249677	0.254614	0.250175	0.240101	0.254734	0.246517	0.247863	0.255565	0.258711	0.255541	0.255129	0.25897	0.256156	0.250863	0.248652	0.243869	0.246829	0.242944	0.248028	0.227325	0.250248	0.243791	0.234951
269	545	0.247089	0.243205	0.245449	0.252228	0.245679	0.26048	0.265644	0.254489	0.256394	0.270597	0.25791	0.250223	0.240648	0.26222	0.253911	0.255309	0.270189	0.239448	0.239314	0.247539	0.23879	0.236526	0.235671	0.248665	0.247496	0.247837	0.250678	0.248724	0.241112	0.253364	0.243594	0.247742	0.2535	0.255983	0.252053	0.253167	0.253234	0.252292	0.246928	0.245688	0.240128	0.241802	0.240955	0.24501	0.22752	0.246357	0.240071	0.230424
270	60	0.252922	0.246876	0.249725	0.255992	0.251738	0.264182	0.27139	0.259039	0.260666	0.272926	0.257891	0.255806	0.243255	0.265291	0.257864	0.261633	0.275263	0.241838	0.24315	0.253226	0.244393	0.239634	0.238915	0.250082	0.253128	0.248182	0.252248	0.252524	0.246252	0.255242	0.245929	0.254346	0.255796	0.258443	0.253734	0.255533	0.25636	0.257972	0.251203	0.244608	0.24015	0.241728	0.243807	0.248147	0.22904	0.250354	0.242085	0.236895
271	61	0.253866	0.250073	0.253879	0.258242	0.256787	0.266391	0.271713	0.260228	0.263176	0.274433	0.261122	0.256894	0.244698	0.265398	0.258837	0.261996	0.277152	0.244444	0.24835	0.254334	0.243946	0.243337	0.239781	0.252702	0.256089	0.251542	0.255821	0.256811	0.246958	0.256089	0.247058	0.256884	0.260343	0.261377	0.25511	0.257809	0.261159	0.259487	0.255708	0.250348	0.243106	0.245951	0.24583	0.252721	0.230887	0.251906	0.245397	0.235022
272	62	0.258795	0.259383	0.25859	0.265242	0.259473	0.263523	0.278516	0.272013	0.260993	0.280122	0.269962	0.269066	0.253733	0.273841	0.27077	0.273236	0.284617	0.253772	0.254217	0.242584	0.254701	0.251609	0.255715	0.253184	0.244453	0.259078	0.259816	0.259409	0.255059	0.263656	0.257153	0.260932	0.267706	0.26563	0.267998	0.267315	0.266514	0.26575	0.26045	0.257242	0.255587	0.254538	0.24577	0.249475	0.246609	0.252327	0.248567	0.250115
273	63	0.262296	0.258412	0.260355	0.265937	0.261688	0.274941	0.280424	0.269284	0.27042	0.283687	0.268733	0.267424	0.249688	0.274513	0.266111	0.26759	0.283687	0.249142	0.255125	0.259305	0.250086	0.250547	0.247547	0.259095	0.260409	0.258327	0.262686	0.262256	0.254482	0.260618	0.253067	0.260667	0.266623	0.267174	0.262458	0.266514	0.268684	0.266936	0.262584	0.257293	0.251046	0.249803	0.251435	0.253907	0.23923	0.257485	0.251557	0.244583
274	67	0.214734	0.219404	0.240386	0.245837	0.215384	0.259544	0.255708	0.260392	0.255537	0.273562	0.261215	0.255462	0.246006	0.269513	0.256678	0.258323	0.274786	0.235565	0.204243	0.251564	0.251799	0.250748	0.253393	0.2543	0.25502	0.228733	0.251342	0.253649	0.237147	0.252897	0.255124	0.247484	0.251034	0.247298	0.263787	0.247988	0.237571	0.249704	0.243247	0.241803	0.252538	0.254499	0.249418	0.254666	0.243245	0.257714	0.250175	0.244738
275	70	0.254661	0.254216	0.253975	0.260211	0.253239	0.257399	0.274999	0.270427	0.254523	0.275317	0.27141	0.264285	0.248289	0.267175	0.267921	0.268583	0.280145	0.249104	0.249373	0.236315	0.249872	0.246986	0.250237	0.248089	0.234158	0.255374	0.253883	0.254528	0.24671	0.258494	0.24944	0.2592	0.259861	0.262854	0.263545	0.259666	0.261361	0.260673	0.256328	0.253235	0.247376	0.247411	0.238876	0.243272	0.244384	0.244233	0.241419	0.243897
276	71	0.253432	0.255395	0.253856	0.259154	0.254894	0.255871	0.273076	0.266469	0.254143	0.274815	0.270289	0.266327	0.250124	0.267971	0.268226	0.268216	0.280762	0.249931	0.248218	0.233409	0.252615	0.248386	0.252951	0.247674	0.233246	0.255438	0.255812	0.253967	0.247757	0.258027	0.250786	0.258553	0.261377	0.263957	0.264302	0.259538	0.26033	0.259588	0.255555	0.254432	0.248523	0.250857	0.238084	0.241932	0.245622	0.244425	0.240612	0.245467
277	72	0.250201	0.252272	0.249829	0.255522	0.251226	0.255964	0.270269	0.265705	0.253696	0.274497	0.266762	0.26241	0.247125	0.266498	0.265813	0.265694	0.278196	0.246687	0.246179	0.23464	0.249746	0.246738	0.25017	0.247209	0.235192	0.25284	0.255036	0.254929	0.244921	0.255379	0.24868	0.25566	0.257745	0.260933	0.26238	0.256866	0.256997	0.258167	0.251896	0.250256	0.246981	0.249067	0.238222	0.241033	0.242716	0.245968	0.241123	0.243561
278	73	0.2401	0.24528	0.244447	0.249923	0.244597	0.249659	0.263759	0.261383	0.248793	0.26813	0.259731	0.256503	0.243017	0.263753	0.25768	0.259112	0.272808	0.241094	0.238863	0.23091	0.244791	0.239016	0.245406	0.245139	0.228852	0.247558	0.248453	0.248274	0.23796	0.24869	0.244946	0.250516	0.251545	0.253472	0.258502	0.250289	0.248494	0.253344	0.243643	0.24132	0.243684	0.245175	0.232171	0.239147	0.233049	0.239174	0.235798	0.236959
279	76	0.248647	0.248566	0.25097	0.256734	0.250376	0.261854	0.271532	0.259383	0.258828	0.275598	0.264091	0.260411	0.244917	0.265474	0.259462	0.260527	0.276874	0.244399	0.24404	0.25	0.246953	0.246442	0.24448	0.25094	0.24817	0.250348	0.252557	0.251189	0.24117	0.254125	0.237873	0.249829	0.255221	0.258656	0.25594	0.25466	0.257308	0.2559	0.250556	0.249146	0.240991	0.242199	0.242118	0.244291	0.233346	0.247814	0.240851	0.238195
280	77	0.245707	0.250441	0.249591	0.2542	0.245549	0.263764	0.269527	0.267843	0.26244	0.2793	0.267759	0.263088	0.2467	0.272248	0.264535	0.265031	0.281888	0.247822	0.244164	0.252499	0.250525	0.252007	0.251843	0.257972	0.253705	0.251031	0.235053	0.243035	0.226459	0.24451	0.255859	0.239558	0.255505	0.252093	0.265354	0.255912	0.253562	0.251382	0.248956	0.25023	0.251226	0.254634	0.251076	0.254438	0.245173	0.257558	0.251706	0.244148
281	79	0.244893	0.24832	0.248337	0.252393	0.243363	0.262974	0.265725	0.266275	0.261258	0.279619	0.269482	0.262787	0.251255	0.275935	0.26596	0.266031	0.282444	0.254493	0.243329	0.257015	0.255292	0.258417	0.258323	0.264337	0.259135	0.250173	0.230819	0.239186	0.223571	0.225931	0.259982	0.230272	0.256953	0.248787	0.268069	0.253331	0.248322	0.254956	0.245634	0.24719	0.257556	0.255641	0.253564	0.259804	0.247859	0.261272	0.257425	0.251171
282	8	0.249574	0.247454	0.250432	0.254355	0.247898	0.262689	0.269807	0.261752	0.25931	0.275339	0.261898	0.257903	0.233367	0.267952	0.260098	0.261856	0.275432	0.242065	0.245037	0.251828	0.23778	0.244675	0.243945	0.250939	0.249431	0.252777	0.250868	0.252871	0.241647	0.253962	0.248665	0.249527	0.254783	0.256268	0.250565	0.25329	0.256021	0.255977	0.250868	0.246043	0.242875	0.245315	0.245006	0.248605	0.233801	0.251719	0.246524	0.225955
283	80	0.242003	0.246479	0.246303	0.252562	0.241592	0.264055	0.266492	0.26699	0.262636	0.280152	0.26799	0.26279	0.25124	0.27487	0.26253	0.26575	0.282501	0.248389	0.237651	0.256665	0.253348	0.255099	0.253773	0.261756	0.25761	0.246842	0.222394	0.238756	0.212803	0.224487	0.256875	0.222371	0.256031	0.244614	0.267729	0.254012	0.24588	0.253773	0.245427	0.245766	0.25618	0.257832	0.25415	0.258813	0.247415	0.262526	0.255399	0.249008
284	81	0.243946	0.245187	0.248119	0.251534	0.242348	0.263684	0.265855	0.265598	0.261906	0.280491	0.266896	0.261036	0.247319	0.273461	0.261228	0.265401	0.281569	0.24959	0.238545	0.256088	0.25061	0.255077	0.252122	0.259061	0.256969	0.247008	0.223151	0.237962	0.163997	0.219268	0.255031	0.218684	0.255383	0.249461	0.265788	0.252156	0.249551	0.250087	0.244329	0.246072	0.255373	0.25295	0.25042	0.256497	0.247934	0.25941	0.254655	0.245409
285	82	0.253642	0.252299	0.256334	0.260871	0.253637	0.267576	0.275872	0.265244	0.263368	0.279057	0.269213	0.264106	0.249106	0.26977	0.266318	0.266466	0.28228	0.247722	0.249949	0.252832	0.250554	0.24962	0.247009	0.255025	0.253203	0.25384	0.254576	0.25219	0.247618	0.256754	0.241435	0.25536	0.259552	0.261896	0.25996	0.25942	0.263159	0.259517	0.254465	0.253802	0.24362	0.245412	0.243256	0.248002	0.239215	0.25183	0.247462	0.240887
286	83	0.250619	0.251029	0.249057	0.253591	0.250478	0.241862	0.266985	0.266074	0.238352	0.265778	0.267949	0.261674	0.248651	0.261187	0.263401	0.262853	0.271545	0.248771	0.24538	0.212595	0.251678	0.242794	0.251612	0.239307	0.216553	0.251827	0.25381	0.253334	0.246122	0.257531	0.253417	0.253562	0.256617	0.257595	0.26618	0.257776	0.253179	0.255734	0.252232	0.247648	0.250052	0.251671	0.228391	0.232774	0.243266	0.232452	0.230854	0.244305
287	84	0.252679	0.2513	0.251614	0.257684	0.254649	0.25443	0.271853	0.266575	0.251202	0.271766	0.270331	0.263385	0.247564	0.266803	0.264508	0.266511	0.276482	0.248142	0.246887	0.233101	0.252074	0.243213	0.250296	0.247807	0.232343	0.255893	0.254469	0.254091	0.245117	0.257591	0.250059	0.256615	0.258744	0.260502	0.263325	0.258485	0.259703	0.258486	0.25438	0.249928	0.248904	0.25048	0.236064	0.241593	0.242216	0.242435	0.237613	0.24344
288	85	0.270804	0.264675	0.271278	0.275831	0.269297	0.28312	0.288351	0.276883	0.280197	0.291622	0.278422	0.275713	0.258094	0.28311	0.275975	0.27872	0.292527	0.25947	0.263169	0.269763	0.257963	0.260423	0.257226	0.269243	0.267583	0.267135	0.269964	0.267471	0.260485	0.271436	0.261582	0.267991	0.274177	0.27739	0.270102	0.27694	0.280836	0.275277	0.271214	0.265796	0.258259	0.259437	0.26319	0.26604	0.249225	0.268167	0.261781	0.252297
289	86	0.259257	0.252597	0.255428	0.261459	0.255445	0.271069	0.277921	0.26589	0.265537	0.280266	0.266568	0.263236	0.248395	0.270543	0.264382	0.2676	0.2816	0.250863	0.251506	0.257512	0.24972	0.249244	0.245768	0.257845	0.256581	0.257578	0.259606	0.257682	0.249201	0.262399	0.251322	0.25607	0.26122	0.265403	0.260192	0.265076	0.265201	0.261312	0.259206	0.256357	0.245224	0.247999	0.247191	0.254333	0.235231	0.256394	0.251129	0.243282
290	87	0.257583	0.256007	0.259352	0.262913	0.258364	0.264866	0.276538	0.266134	0.262806	0.278611	0.268217	0.266206	0.249052	0.269334	0.264545	0.265519	0.280282	0.250275	0.251562	0.246243	0.248276	0.24579	0.246095	0.252057	0.246069	0.256536	0.258963	0.258756	0.251867	0.261787	0.251032	0.260252	0.26418	0.265511	0.261235	0.264097	0.266152	0.263038	0.260894	0.256111	0.246917	0.248982	0.243408	0.247444	0.240869	0.247866	0.244509	0.241968
291	89	0.253264	0.257678	0.228306	0.23348	0.252927	0.256356	0.246354	0.255561	0.253194	0.271606	0.257351	0.250125	0.261493	0.272295	0.252814	0.255603	0.27263	0.256561	0.2472	0.267651	0.265602	0.263716	0.265338	0.270971	0.267127	0.258626	0.265601	0.268948	0.256779	0.268271	0.268838	0.263423	0.24788	0.24622	0.275584	0.24546	0.218214	0.245797	0.238436	0.238426	0.264181	0.264787	0.263084	0.267862	0.253921	0.269873	0.263057	0.257705
292	90	0.231918	0.239664	0.252711	0.256817	0.234636	0.264684	0.270711	0.271671	0.259527	0.280379	0.272614	0.266642	0.25727	0.276167	0.26894	0.271124	0.282822	0.246834	0.228778	0.253091	0.260914	0.259029	0.261583	0.25966	0.254204	0.240461	0.26001	0.263294	0.249786	0.262658	0.263969	0.257719	0.261105	0.260111	0.273375	0.263467	0.253179	0.261463	0.254474	0.255921	0.260854	0.263237	0.252661	0.255375	0.254176	0.259663	0.241498	0.253095
293	91	0.250206	0.252809	0.226744	0.232264	0.248561	0.240351	0.217618	0.243241	0.237245	0.25702	0.241021	0.233298	0.259722	0.263261	0.232874	0.23506	0.255058	0.25572	0.243956	0.265811	0.261967	0.259978	0.264952	0.266509	0.264658	0.255906	0.262563	0.267453	0.254039	0.264153	0.26828	0.261706	0.246219	0.240241	0.275428	0.242728	0.214574	0.244627	0.237434	0.235675	0.262956	0.265337	0.261587	0.267529	0.255559	0.269941	0.262143	0.257954
294	92	0.258472	0.253192	0.258475	0.264051	0.256938	0.273535	0.278538	0.266841	0.26917	0.281696	0.267579	0.263541	0.24691	0.27149	0.265314	0.266807	0.282804	0.250818	0.252553	0.256451	0.24733	0.249339	0.247546	0.257196	0.257688	0.256239	0.257548	0.256128	0.248273	0.259002	0.249252	0.253719	0.263588	0.264926	0.258492	0.263607	0.266523	0.263565	0.259404	0.255144	0.246427	0.247232	0.24881	0.251837	0.233624	0.254986	0.249259	0.240584
295	93	0.27221	0.274242	0.253122	0.258707	0.270822	0.262292	0.246999	0.26401	0.25817	0.276354	0.263368	0.258412	0.279281	0.280678	0.258132	0.259804	0.272979	0.277301	0.266069	0.277399	0.280126	0.279062	0.283359	0.28362	0.276534	0.275569	0.283737	0.285006	0.273537	0.285157	0.285474	0.282454	0.268779	0.265257	0.294005	0.266673	0.243639	0.267379	0.262505	0.259431	0.282645	0.283106	0.277409	0.281549	0.275022	0.284226	0.27774	0.275438
296	97	0.198016	0.207923	0.232274	0.23776	0.193472	0.254311	0.247769	0.257354	0.251219	0.273033	0.257382	0.252935	0.247995	0.271617	0.251154	0.255445	0.272656	0.229853	0.18437	0.252406	0.25181	0.256046	0.260701	0.257459	0.254232	0.205195	0.246245	0.253584	0.234476	0.246224	0.262297	0.246092	0.245256	0.241659	0.268231	0.243371	0.226076	0.24543	0.238424	0.235842	0.256749	0.258916	0.253697	0.257172	0.249785	0.261796	0.254666	0.248002
297	N10	0.254112	0.251774	0.253714	0.257711	0.254475	0.262576	0.273184	0.268631	0.259518	0.278584	0.26872	0.261918	0.249159	0.269876	0.264658	0.268017	0.279	0.247564	0.246835	0.248314	0.252217	0.24925	0.248145	0.251219	0.245236	0.25209	0.254962	0.25276	0.247861	0.25764	0.249459	0.254496	0.259476	0.261533	0.262194	0.259098	0.260641	0.256887	0.254339	0.250558	0.247114	0.248438	0.244904	0.249023	0.24219	0.250355	0.245423	0.242606
298	N8	0.256967	0.25557	0.259086	0.264576	0.255166	0.272935	0.278375	0.273678	0.271	0.286338	0.274954	0.268405	0.255265	0.276726	0.270085	0.272777	0.288765	0.249913	0.251481	0.264582	0.259304	0.25568	0.253439	0.264779	0.26156	0.25739	0.262003	0.261771	0.252241	0.263799	0.259591	0.259152	0.26622	0.266063	0.268255	0.265629	0.264812	0.265636	0.261155	0.260354	0.256533	0.258026	0.258532	0.261983	0.248723	0.263036	0.259219	0.249694
299	N9	0.25116	0.247179	0.250424	0.253092	0.249968	0.260299	0.268811	0.262702	0.259479	0.274112	0.262212	0.259632	0.244899	0.266715	0.258789	0.261818	0.275526	0.24426	0.24423	0.250307	0.247602	0.241462	0.242864	0.251303	0.249197	0.251262	0.25294	0.252722	0.243401	0.25694	0.248815	0.252473	0.257985	0.259164	0.257062	0.256785	0.257229	0.258576	0.249838	0.246777	0.245457	0.246945	0.244341	0.249555	0.233089	0.251541	0.24564	0.23481
[truncated: 251 more columns]
