# Supplementary material for: Development of core-collections for Guizhou tea genetic resources and GWAS of leaf size using SNP developed by genotyping-by-sequencing
Source: PeerJ. 2020 Mar 13;8:e8572. doi: 10.7717/peerj.8572 (PMC7075365; doi:10.7717/peerj.8572)
Supplement: Table S4 [file peerj-08-8572-s010.xlsx]

## Sheet: Sheet1
	Table S4 Identity-by-state (IBS)-based genetic distance matrix for 198 accessions using 30,282 polymorphic SNPs.
Unit		1	2	3	4	5	6	7	8	9	10	11	12	13	14	15	16	17	18	19	20	21	22	23	24	25	26	27	28	29	30	31	32	33	34	35	36	37	38	39	40	41	42	43	44	45	46	47	48
	DNA ID
1	1
2	100	0.210397
3	102	0.22731	0.23555
4	107	0.191206	0.206449	0.227321
5	111	0.246306	0.252464	0.202901	0.242973
6	117	0.269563	0.273011	0.250082	0.269326	0.231548
7	119	0.248728	0.250958	0.224421	0.245264	0.216205	0.256009
8	12	0.24576	0.24621	0.248938	0.244306	0.269002	0.275709	0.261016
9	120	0.267583	0.268481	0.254158	0.267901	0.258671	0.276936	0.255374	0.270817
10	122	0.252171	0.253591	0.226133	0.250243	0.215824	0.255972	0.223906	0.260972	0.257449
11	123	0.253732	0.254227	0.229006	0.248404	0.219462	0.258532	0.221808	0.263027	0.261873	0.224985
12	126	0.227381	0.229734	0.242563	0.22799	0.261057	0.272679	0.255598	0.243784	0.267708	0.257904	0.260347
13	127	0.196503	0.200706	0.223056	0.190048	0.240578	0.265824	0.243529	0.242335	0.263912	0.245895	0.247615	0.222707
14	130	0.253929	0.25216	0.251434	0.254128	0.269411	0.272614	0.261281	0.249715	0.268172	0.260616	0.263632	0.246232	0.247422
15	131	0.258505	0.254751	0.259298	0.258577	0.275958	0.279844	0.264484	0.246381	0.271821	0.265108	0.266161	0.244244	0.251512	0.2211
16	138	0.232415	0.234763	0.236905	0.232476	0.256514	0.271492	0.252951	0.241296	0.267216	0.252779	0.258614	0.241588	0.227244	0.246478	0.245345
17	140	0.258565	0.253945	0.261263	0.259276	0.278748	0.282189	0.267252	0.251163	0.274107	0.269089	0.26898	0.251994	0.251575	0.254791	0.25299	0.25
18	15	0.266963	0.265574	0.268396	0.267453	0.287132	0.291926	0.274928	0.248889	0.283955	0.276461	0.280975	0.260895	0.262861	0.260939	0.260194	0.261228	0.26221
19	152	0.222563	0.234291	0.160584	0.216354	0.1813	0.241017	0.212238	0.255033	0.251729	0.214231	0.217777	0.244618	0.216802	0.255721	0.266584	0.23817	0.267022	0.277429
20	157	0.233995	0.243176	0.202305	0.232519	0.224048	0.258355	0.234264	0.251683	0.259619	0.236302	0.240974	0.247675	0.230782	0.253693	0.259312	0.232555	0.260373	0.268356	0.171179
21	161	0.231817	0.240518	0.202382	0.233034	0.223522	0.25764	0.234627	0.248924	0.262122	0.237641	0.23903	0.24503	0.228829	0.251988	0.255831	0.239285	0.257251	0.267397	0.181807	0.21139
22	172	0.247946	0.248829	0.248628	0.248128	0.269784	0.271128	0.260123	0.247494	0.264044	0.261854	0.263558	0.247	0.244952	0.24419	0.25	0.244861	0.247398	0.263342	0.256337	0.253374	0.248075
23	173	0.254046	0.254124	0.25459	0.254312	0.274186	0.275927	0.267574	0.251484	0.271449	0.266917	0.268634	0.251789	0.246778	0.248801	0.254246	0.251119	0.250851	0.265616	0.260284	0.256825	0.252129	0.238848
24	177	0.245076	0.244171	0.24876	0.245834	0.266242	0.271719	0.255304	0.238459	0.267744	0.253516	0.256592	0.235368	0.237622	0.2395	0.232535	0.239999	0.240668	0.251509	0.253401	0.246333	0.243128	0.239779	0.242581
25	18	0.245423	0.240713	0.246974	0.241864	0.263907	0.271719	0.25414	0.214778	0.264938	0.254289	0.257648	0.240152	0.236679	0.242393	0.239973	0.236759	0.246452	0.243561	0.253156	0.247307	0.2469	0.241136	0.245645	0.228317
26	181	0.250228	0.253068	0.246161	0.251083	0.267737	0.267478	0.261759	0.251286	0.262295	0.264721	0.266491	0.250471	0.248075	0.245697	0.255415	0.248115	0.257658	0.268263	0.252128	0.253332	0.248385	0.23138	0.234834	0.24692	0.245487
27	186	0.247224	0.245115	0.249544	0.248952	0.270605	0.274149	0.25866	0.241656	0.265774	0.259171	0.260532	0.242839	0.24147	0.241003	0.244642	0.243304	0.240053	0.254798	0.258157	0.249299	0.24629	0.24037	0.217056	0.224399	0.233307	0.24928
28	190	0.238213	0.243952	0.208587	0.237816	0.220385	0.256105	0.231556	0.249679	0.245107	0.233718	0.236401	0.245997	0.232357	0.251536	0.25409	0.242687	0.259233	0.267491	0.19611	0.220892	0.221572	0.250949	0.252821	0.247128	0.247766	0.249101	0.249925
29	192	0.248504	0.245739	0.250993	0.246897	0.269075	0.272615	0.25472	0.240222	0.26627	0.254552	0.259083	0.238383	0.243461	0.238355	0.23687	0.238017	0.244259	0.251449	0.255777	0.249471	0.246976	0.243538	0.245315	0.221233	0.234407	0.248708	0.23048	0.24946
30	194	0.246009	0.247678	0.249736	0.247278	0.271854	0.278862	0.259556	0.246329	0.269761	0.261931	0.264983	0.243796	0.242673	0.247649	0.249242	0.236453	0.250749	0.260448	0.255483	0.2477	0.246505	0.245348	0.252874	0.237852	0.242008	0.25212	0.243736	0.250201	0.242924
31	195	0.253857	0.250691	0.254059	0.251843	0.27182	0.276207	0.257871	0.244887	0.266221	0.259056	0.262546	0.244303	0.249346	0.245845	0.244414	0.248447	0.248235	0.256488	0.260557	0.253745	0.25154	0.246053	0.249441	0.23214	0.238261	0.251811	0.239215	0.250215	0.233714	0.247475
32	199	0.240622	0.237311	0.246656	0.238712	0.258659	0.267055	0.247331	0.233913	0.263356	0.245468	0.248236	0.234705	0.234676	0.237979	0.235447	0.235224	0.239336	0.251196	0.242515	0.244375	0.237174	0.234131	0.239349	0.227147	0.230934	0.239445	0.223834	0.248021	0.227496	0.240724	0.231395
33	20	0.245054	0.247359	0.250158	0.245609	0.267514	0.275326	0.258478	0.225508	0.272143	0.260586	0.263389	0.244507	0.241147	0.250443	0.248563	0.241602	0.25344	0.254265	0.253647	0.249343	0.248443	0.249487	0.253173	0.23943	0.236114	0.251146	0.244122	0.251717	0.243559	0.249682	0.250994	0.233217
34	200	0.256431	0.248377	0.25478	0.254079	0.272993	0.277372	0.257071	0.240771	0.265951	0.256744	0.260754	0.242137	0.248089	0.240501	0.239957	0.246555	0.244053	0.252384	0.261385	0.253453	0.250919	0.244747	0.247082	0.229293	0.235705	0.251385	0.234594	0.250754	0.231236	0.244403	0.23044	0.220168	0.243485
35	201	0.255314	0.248704	0.254979	0.252278	0.274088	0.276098	0.259279	0.243457	0.265794	0.2585	0.261953	0.243822	0.249071	0.241139	0.24211	0.246812	0.24782	0.257592	0.262232	0.254912	0.251001	0.245263	0.250128	0.229636	0.234763	0.252739	0.23429	0.252576	0.235501	0.245488	0.236231	0.219857	0.24796	0.22784
36	203	0.24124	0.246432	0.214567	0.242493	0.212675	0.252908	0.228398	0.253746	0.256555	0.225813	0.230402	0.250372	0.236856	0.256814	0.257033	0.247062	0.262643	0.268919	0.205045	0.22732	0.226833	0.257362	0.261637	0.247353	0.249295	0.259989	0.247615	0.226474	0.246204	0.256535	0.251505	0.235731	0.256235	0.250123	0.250088
37	205	0.234546	0.239818	0.239585	0.232077	0.258037	0.273022	0.256803	0.24164	0.272784	0.256197	0.25894	0.242634	0.231451	0.249022	0.250252	0.200886	0.251909	0.261439	0.238397	0.235105	0.235319	0.244863	0.251801	0.237654	0.240266	0.249344	0.240755	0.247264	0.244332	0.240899	0.249355	0.237696	0.241961	0.249105	0.24443	0.245953
38	206	0.260187	0.256594	0.256107	0.257645	0.275167	0.279055	0.262584	0.25336	0.270299	0.266071	0.267387	0.25	0.25224	0.250878	0.249548	0.253056	0.252235	0.265385	0.263552	0.258997	0.256638	0.252649	0.25599	0.234229	0.243505	0.257087	0.241935	0.254254	0.23882	0.249394	0.246246	0.24263	0.252752	0.245496	0.241292	0.256445	0.255227
39	209	0.245596	0.247434	0.227933	0.241648	0.22295	0.254366	0.234084	0.248572	0.257588	0.233142	0.236853	0.247415	0.239755	0.255765	0.251411	0.246385	0.257136	0.26461	0.221376	0.237678	0.234408	0.25069	0.25662	0.242256	0.245969	0.254244	0.246755	0.227866	0.245336	0.251846	0.24457	0.236869	0.250013	0.241689	0.24397	0.223208	0.247372	0.251791
40	210	0.269566	0.266795	0.261973	0.264153	0.265487	0.279381	0.262828	0.26363	0.279928	0.265046	0.266025	0.263839	0.258854	0.265456	0.264555	0.265607	0.269599	0.276607	0.260573	0.263022	0.259281	0.266059	0.269346	0.253635	0.258393	0.271925	0.259901	0.259779	0.258302	0.265326	0.25911	0.24896	0.265481	0.254256	0.255429	0.259629	0.269392	0.264442	0.223383
41	214	0.252476	0.25954	0.229531	0.253003	0.219159	0.259727	0.224919	0.267155	0.262426	0.224625	0.231488	0.260028	0.248201	0.266584	0.271236	0.261467	0.274079	0.281604	0.216673	0.239906	0.237567	0.266512	0.272212	0.260484	0.259685	0.266433	0.263929	0.236173	0.262235	0.268623	0.266037	0.254607	0.266882	0.26468	0.262214	0.230431	0.265982	0.270273	0.234413	0.266834
42	217	0.242433	0.239821	0.243194	0.2411	0.262695	0.270716	0.251651	0.235383	0.260864	0.255394	0.254273	0.233506	0.23504	0.234641	0.23597	0.234305	0.242592	0.249457	0.252119	0.247008	0.244312	0.23631	0.240502	0.229089	0.228069	0.242259	0.228378	0.243991	0.223303	0.236619	0.234347	0.230988	0.237556	0.233238	0.228582	0.249129	0.237436	0.240626	0.241947	0.254307	0.25924
43	22	0.244471	0.247231	0.249557	0.242782	0.266578	0.271652	0.256725	0.237261	0.26592	0.257284	0.259976	0.24236	0.243137	0.242986	0.243865	0.240221	0.24599	0.247413	0.250704	0.246374	0.247478	0.245556	0.24635	0.235257	0.233557	0.247131	0.237105	0.244972	0.234206	0.244996	0.239818	0.232472	0.229909	0.237283	0.239638	0.253667	0.238204	0.247901	0.248426	0.258489	0.262796	0.229316
44	227	0.244972	0.244764	0.220815	0.244377	0.241581	0.267158	0.248162	0.248465	0.266532	0.251848	0.251138	0.248531	0.237414	0.254492	0.253916	0.240944	0.256526	0.266236	0.218813	0.234976	0.233371	0.249594	0.254272	0.246338	0.243269	0.252625	0.248149	0.237718	0.250258	0.253366	0.252095	0.239068	0.249489	0.251399	0.253158	0.24233	0.244107	0.257247	0.244374	0.267394	0.253222	0.241234	0.247125
45	233	0.248505	0.248269	0.251007	0.246544	0.27073	0.278386	0.259683	0.246051	0.269	0.261005	0.263567	0.24616	0.244857	0.250971	0.250619	0.245907	0.251864	0.261115	0.256904	0.254484	0.249288	0.24708	0.253835	0.237696	0.242814	0.252234	0.243059	0.252504	0.243867	0.246322	0.244421	0.236764	0.246845	0.242799	0.241768	0.256121	0.244985	0.250181	0.249924	0.26486	0.268481	0.236139	0.245855	0.251742
46	234	0.24992	0.250608	0.239619	0.249431	0.264257	0.274812	0.259229	0.24689	0.270402	0.26243	0.263189	0.247504	0.242755	0.25473	0.25353	0.247589	0.254429	0.263556	0.244905	0.246491	0.24743	0.250727	0.253477	0.240638	0.2426	0.255299	0.243996	0.246969	0.245037	0.249773	0.251338	0.238962	0.252816	0.247908	0.249924	0.251224	0.248163	0.25482	0.252705	0.270246	0.26406	0.238842	0.247463	0.230781	0.2518
47	235	0.232273	0.234418	0.201342	0.233668	0.224855	0.257284	0.233208	0.240514	0.255565	0.238288	0.237137	0.235531	0.226304	0.246012	0.246139	0.23449	0.248871	0.259228	0.196497	0.218969	0.217706	0.243355	0.250853	0.234452	0.23832	0.246718	0.234869	0.224263	0.239497	0.242225	0.245065	0.226366	0.243093	0.242296	0.243897	0.226441	0.236858	0.24906	0.229495	0.255749	0.240728	0.233671	0.237773	0.201133	0.242961	0.207667
48	237	0.229799	0.237138	0.190561	0.230612	0.215733	0.254091	0.228488	0.248102	0.256951	0.232404	0.233604	0.243404	0.227638	0.248316	0.255634	0.238255	0.258078	0.26803	0.177413	0.21081	0.209503	0.250746	0.255221	0.243991	0.247222	0.250328	0.248642	0.218301	0.248753	0.247844	0.252666	0.232877	0.249747	0.247816	0.253006	0.225424	0.242668	0.254058	0.2297	0.259898	0.233678	0.240802	0.247711	0.232604	0.241375	0.243038	0.206958
49	239	0.249559	0.242725	0.247805	0.245681	0.267123	0.273003	0.252858	0.24136	0.265357	0.256408	0.259653	0.239063	0.240877	0.238169	0.237135	0.240525	0.247278	0.254339	0.254638	0.251119	0.243833	0.239204	0.247127	0.223363	0.235759	0.247313	0.230342	0.250771	0.227744	0.240465	0.229003	0.223082	0.24162	0.225379	0.229606	0.24846	0.241791	0.234999	0.243876	0.254939	0.261665	0.222523	0.239566	0.246938	0.225845	0.243863	0.23663	0.233912
50	24	0.244712	0.246195	0.218994	0.24595	0.229494	0.260192	0.236783	0.25498	0.259985	0.239668	0.242492	0.251995	0.239633	0.253973	0.258876	0.2515	0.262323	0.271051	0.209527	0.231639	0.230965	0.256284	0.259461	0.246271	0.25212	0.255985	0.250641	0.223064	0.249897	0.257198	0.252463	0.240291	0.256459	0.251037	0.252906	0.23307	0.252909	0.257673	0.239054	0.263065	0.242297	0.246618	0.253758	0.24671	0.255185	0.253182	0.228976	0.224392
51	241	0.164294	0.188206	0.21278	0.164921	0.229586	0.26204	0.2384	0.242346	0.265376	0.240725	0.240682	0.222941	0.169609	0.251574	0.258331	0.221552	0.255841	0.266646	0.199935	0.222594	0.223005	0.246404	0.250583	0.249464	0.243945	0.245417	0.249517	0.225617	0.248493	0.242773	0.252176	0.238811	0.239754	0.256512	0.254529	0.234671	0.223531	0.261023	0.241252	0.265419	0.243378	0.244685	0.244501	0.236917	0.244976	0.245376	0.223319	0.221007
52	244	0.20673	0.214415	0.231956	0.20426	0.24833	0.270196	0.243813	0.240159	0.268388	0.245984	0.251429	0.226227	0.203446	0.247568	0.248131	0.236398	0.250713	0.259314	0.228128	0.235177	0.233778	0.242031	0.248699	0.235352	0.239135	0.246539	0.236468	0.240597	0.238952	0.241973	0.242057	0.23344	0.239888	0.241627	0.241245	0.240921	0.232985	0.247994	0.23742	0.257898	0.252659	0.233787	0.242265	0.240028	0.229622	0.245229	0.229296	0.224489
53	245	0.226372	0.23628	0.193778	0.225728	0.217145	0.253355	0.230164	0.247999	0.258176	0.232669	0.237303	0.240619	0.223672	0.251446	0.259593	0.234716	0.259785	0.267827	0.174664	0.209827	0.205512	0.2492	0.255328	0.244383	0.244933	0.250389	0.24794	0.218381	0.252039	0.249738	0.254885	0.243391	0.243417	0.252926	0.255109	0.22355	0.234521	0.258226	0.232069	0.261645	0.235645	0.241276	0.246289	0.228316	0.245667	0.244174	0.209844	0.194015
54	25	0.262721	0.264926	0.24132	0.260373	0.245689	0.272459	0.253354	0.268383	0.272811	0.256634	0.257834	0.265464	0.257167	0.267058	0.271729	0.264033	0.275334	0.282112	0.232698	0.24859	0.247164	0.263417	0.267302	0.262304	0.264083	0.260444	0.267596	0.243459	0.264224	0.270516	0.269431	0.256062	0.26939	0.266279	0.267721	0.248647	0.264999	0.273348	0.254634	0.27729	0.258755	0.257797	0.266258	0.258457	0.269579	0.266708	0.246008	0.245163
55	251	0.229707	0.233953	0.19513	0.226647	0.220826	0.251108	0.228068	0.242315	0.254323	0.229169	0.232587	0.23953	0.223491	0.243984	0.246674	0.23206	0.251761	0.261157	0.185859	0.21221	0.210128	0.242247	0.247212	0.234318	0.234138	0.242004	0.240741	0.215116	0.242848	0.244705	0.245704	0.228897	0.242261	0.243069	0.243145	0.224614	0.235385	0.249918	0.227424	0.256179	0.234119	0.230611	0.238099	0.226815	0.245577	0.237328	0.212029	0.197559
56	258	0.252312	0.251543	0.253769	0.25458	0.274223	0.276565	0.261811	0.245892	0.269263	0.260257	0.263919	0.244826	0.248895	0.244988	0.242869	0.246052	0.248328	0.258415	0.260203	0.255809	0.253025	0.247896	0.249159	0.227568	0.23976	0.251914	0.23804	0.253258	0.231865	0.247366	0.240841	0.231069	0.248616	0.239305	0.237593	0.253628	0.250406	0.245192	0.249704	0.260404	0.264619	0.234085	0.243965	0.249991	0.243959	0.250575	0.242068	0.252705
57	263	0.25083	0.246736	0.250329	0.252153	0.271308	0.272867	0.257092	0.242276	0.267989	0.256997	0.259459	0.240514	0.243227	0.241339	0.238426	0.238731	0.247222	0.25391	0.259536	0.253887	0.248428	0.243244	0.246452	0.22005	0.234727	0.249627	0.233311	0.249725	0.228029	0.244026	0.236394	0.226514	0.243965	0.23198	0.23042	0.250327	0.243637	0.238633	0.248084	0.256894	0.262138	0.227657	0.236443	0.246025	0.240604	0.248164	0.239246	0.250499
58	265	0.222926	0.223773	0.242202	0.216942	0.259672	0.274785	0.25896	0.24698	0.269336	0.25766	0.258878	0.238315	0.210768	0.253609	0.254201	0.241715	0.256718	0.26511	0.239323	0.245438	0.244764	0.251489	0.255897	0.244679	0.245397	0.255621	0.247212	0.246707	0.247874	0.250403	0.251844	0.237415	0.24986	0.248941	0.249002	0.251151	0.242414	0.256509	0.250786	0.267114	0.26328	0.243399	0.24861	0.246789	0.250723	0.252117	0.23896	0.242741
59	267	0.254405	0.251384	0.251567	0.254055	0.267898	0.276893	0.260569	0.248021	0.269909	0.260446	0.26323	0.246608	0.245846	0.246821	0.245571	0.245236	0.251236	0.259519	0.254366	0.252438	0.248425	0.250129	0.253694	0.238409	0.240225	0.2528	0.241027	0.248965	0.239812	0.249285	0.245291	0.238635	0.246854	0.242371	0.241415	0.253295	0.24525	0.250273	0.248629	0.264105	0.264704	0.233092	0.243362	0.252183	0.249586	0.249625	0.243527	0.25052
60	268	0.231586	0.229195	0.243301	0.227146	0.261798	0.275984	0.260499	0.245939	0.27148	0.26033	0.262851	0.241433	0.212838	0.249801	0.250691	0.243798	0.253431	0.265507	0.245595	0.247064	0.249907	0.251942	0.255868	0.242752	0.241704	0.254392	0.248551	0.248322	0.248962	0.249956	0.248532	0.240863	0.248125	0.249206	0.246505	0.251872	0.243114	0.255101	0.250527	0.268016	0.264499	0.242047	0.251308	0.251589	0.250693	0.253485	0.241338	0.244532
61	269	0.257037	0.254493	0.258866	0.25886	0.278108	0.281845	0.264034	0.24728	0.272246	0.264047	0.266124	0.248169	0.251887	0.247214	0.243397	0.250139	0.249764	0.260299	0.267213	0.261171	0.254134	0.249407	0.254278	0.236734	0.240512	0.255399	0.242665	0.255232	0.238923	0.248053	0.243105	0.236441	0.249731	0.238029	0.24446	0.258073	0.253286	0.248923	0.250426	0.263569	0.270027	0.236665	0.244054	0.255974	0.247643	0.254472	0.248255	0.253861
62	273	0.229173	0.225339	0.235233	0.228542	0.256577	0.267997	0.254647	0.245269	0.265012	0.252936	0.254446	0.236865	0.22117	0.242126	0.249745	0.235884	0.250145	0.262697	0.236458	0.240481	0.239962	0.234811	0.24323	0.237834	0.239075	0.229437	0.241401	0.240115	0.242415	0.244683	0.244275	0.230904	0.242021	0.247422	0.244654	0.245835	0.237056	0.253357	0.246768	0.263671	0.258764	0.236123	0.24361	0.245672	0.247714	0.249027	0.233914	0.23876
63	28	0.259293	0.256879	0.256857	0.260248	0.274807	0.280398	0.261092	0.247	0.272564	0.26202	0.266007	0.246457	0.251296	0.247677	0.244174	0.251542	0.254254	0.259757	0.265538	0.260428	0.25498	0.252979	0.254233	0.238648	0.239349	0.2568	0.241998	0.256418	0.240465	0.248515	0.24054	0.229594	0.253287	0.237607	0.239312	0.257869	0.252318	0.24754	0.250211	0.262016	0.266873	0.234544	0.246041	0.257035	0.247179	0.25348	0.246842	0.253026
64	280	0.25272	0.248162	0.255439	0.249781	0.272921	0.277444	0.256763	0.243702	0.266243	0.262844	0.264905	0.243623	0.246993	0.242675	0.24335	0.244474	0.246105	0.256726	0.260761	0.25407	0.250835	0.24498	0.250082	0.234938	0.239654	0.248948	0.23672	0.246768	0.237328	0.247632	0.24161	0.229673	0.248391	0.237224	0.233092	0.255383	0.249447	0.242635	0.247633	0.260964	0.264335	0.231024	0.238083	0.250415	0.244346	0.248381	0.241615	0.250898
65	281	0.250446	0.247584	0.253254	0.250124	0.273077	0.27619	0.25944	0.245508	0.268397	0.259732	0.264187	0.241102	0.244709	0.244853	0.242114	0.242216	0.248072	0.255411	0.262445	0.255054	0.249569	0.245084	0.249909	0.232473	0.235349	0.250988	0.233684	0.250506	0.234667	0.244356	0.240324	0.229141	0.24439	0.233151	0.236986	0.253086	0.245725	0.244115	0.246207	0.259103	0.264826	0.229721	0.239674	0.250178	0.244809	0.24841	0.244058	0.249951
66	282	0.241978	0.246491	0.211807	0.239174	0.231259	0.262103	0.239627	0.253333	0.26258	0.241327	0.244359	0.244658	0.236349	0.253184	0.256484	0.245894	0.257797	0.269078	0.199987	0.223978	0.224051	0.252673	0.257045	0.244421	0.249634	0.255995	0.252213	0.229215	0.247789	0.252331	0.253613	0.244822	0.254954	0.251054	0.252124	0.235012	0.247617	0.253855	0.236288	0.2622	0.244077	0.243675	0.247382	0.23854	0.253147	0.250554	0.224052	0.217581
67	284	0.225778	0.22571	0.242971	0.220484	0.262004	0.274801	0.257172	0.24677	0.270365	0.259255	0.260343	0.234843	0.216544	0.250222	0.249414	0.243374	0.256766	0.265238	0.244019	0.247251	0.24453	0.249242	0.255045	0.23955	0.243638	0.252064	0.248966	0.247426	0.24501	0.24977	0.249497	0.239421	0.249295	0.247345	0.245741	0.249189	0.242457	0.25632	0.250932	0.265783	0.261274	0.240946	0.245412	0.254866	0.250167	0.251354	0.241036	0.243921
68	285	0.257866	0.254445	0.258624	0.258278	0.27657	0.280723	0.266035	0.250202	0.272313	0.265559	0.268308	0.246877	0.249716	0.249962	0.246779	0.250945	0.250806	0.261747	0.265669	0.259819	0.256439	0.252794	0.25195	0.241415	0.244247	0.256083	0.239671	0.257464	0.239888	0.25142	0.243812	0.24466	0.250052	0.240584	0.243702	0.258853	0.253485	0.249054	0.251979	0.263285	0.270168	0.236452	0.245203	0.254937	0.248512	0.253082	0.247828	0.256173
69	287	0.211161	0.214126	0.234025	0.201098	0.253413	0.2704	0.251251	0.245226	0.26712	0.253163	0.253609	0.231749	0.199711	0.249364	0.25269	0.233225	0.252558	0.26459	0.229433	0.240259	0.238767	0.248363	0.254293	0.243341	0.246145	0.254178	0.247734	0.238931	0.24539	0.24686	0.248625	0.241174	0.245699	0.249184	0.24999	0.245847	0.239886	0.255467	0.247945	0.264367	0.255593	0.240202	0.24724	0.246454	0.247865	0.248483	0.233249	0.235537
70	294	0.25138	0.248683	0.255353	0.253076	0.27376	0.275727	0.259762	0.242626	0.266516	0.260823	0.263582	0.241347	0.245838	0.244719	0.242386	0.245783	0.247799	0.254916	0.261411	0.253716	0.251064	0.244565	0.246649	0.233699	0.236587	0.251109	0.2317	0.251558	0.233711	0.244482	0.239307	0.235629	0.243808	0.233742	0.23631	0.253472	0.248432	0.242551	0.246657	0.258428	0.264544	0.231706	0.238758	0.251409	0.24312	0.249896	0.242758	0.250629
71	295	0.253941	0.249857	0.254862	0.251358	0.272947	0.280141	0.262162	0.243462	0.272233	0.264846	0.265994	0.246989	0.246239	0.245194	0.245292	0.238513	0.25119	0.258856	0.260304	0.253007	0.251854	0.249813	0.252242	0.239466	0.239215	0.254118	0.24294	0.25191	0.245427	0.246255	0.249681	0.237739	0.247478	0.24333	0.245904	0.259331	0.242684	0.250966	0.25392	0.265189	0.269599	0.236281	0.243398	0.250044	0.249068	0.251693	0.244011	0.253497
72	296	0.249526	0.249911	0.253466	0.248631	0.270304	0.278483	0.262219	0.248255	0.270302	0.265627	0.266266	0.250532	0.242868	0.249761	0.252269	0.238554	0.251725	0.263827	0.255615	0.251093	0.246908	0.247693	0.250973	0.24385	0.242385	0.251967	0.242638	0.249551	0.249056	0.247324	0.249521	0.241441	0.248061	0.248409	0.24862	0.258226	0.241016	0.25527	0.254601	0.269437	0.269986	0.242257	0.244654	0.25366	0.252064	0.252336	0.245492	0.253933
73	297	0.246625	0.245396	0.245604	0.243249	0.263816	0.267738	0.254954	0.238286	0.264051	0.256606	0.254845	0.236264	0.240037	0.240779	0.241474	0.235484	0.240226	0.250912	0.25251	0.245297	0.243024	0.236279	0.243364	0.225559	0.231147	0.244162	0.224772	0.248017	0.230267	0.239575	0.236228	0.225146	0.238181	0.232673	0.233791	0.24556	0.238728	0.239385	0.242971	0.257448	0.260327	0.224675	0.234014	0.243958	0.242042	0.242584	0.235185	0.245306
74	302	0.246305	0.243318	0.246904	0.242664	0.268849	0.272743	0.255012	0.240958	0.263715	0.258032	0.261038	0.241785	0.240422	0.242241	0.244636	0.238196	0.239593	0.255313	0.253622	0.247784	0.247053	0.239772	0.244887	0.23093	0.234014	0.247631	0.229478	0.246181	0.235712	0.239934	0.238957	0.233685	0.245134	0.239501	0.238162	0.249149	0.238022	0.242423	0.246476	0.260982	0.263539	0.228156	0.235608	0.245127	0.242584	0.244094	0.238606	0.247913
75	303	0.244808	0.244354	0.243744	0.244881	0.263595	0.272177	0.255868	0.235361	0.265753	0.256152	0.258481	0.239648	0.239171	0.241111	0.24269	0.234871	0.239661	0.253628	0.251149	0.245485	0.246414	0.238018	0.24308	0.230798	0.234465	0.246055	0.228236	0.247809	0.231108	0.238912	0.240384	0.22821	0.242275	0.237148	0.235982	0.249163	0.237494	0.241769	0.244513	0.259029	0.262071	0.228259	0.234374	0.244485	0.241853	0.242793	0.236422	0.245493
76	304	0.205261	0.209816	0.231632	0.203759	0.249163	0.267462	0.247856	0.241475	0.265963	0.247494	0.248912	0.223115	0.20397	0.24526	0.247431	0.230621	0.249855	0.259213	0.227969	0.235453	0.234973	0.244506	0.248237	0.238586	0.238338	0.246623	0.240504	0.238366	0.236804	0.242197	0.244377	0.232649	0.241358	0.246541	0.243919	0.241845	0.233961	0.250573	0.245598	0.263691	0.251901	0.235249	0.242831	0.238931	0.243383	0.245761	0.230264	0.234768
77	306	0.26053	0.258925	0.259596	0.258337	0.279217	0.282703	0.268099	0.24658	0.273665	0.265487	0.269598	0.252079	0.254	0.252589	0.252621	0.24951	0.247811	0.263423	0.264771	0.258317	0.253985	0.249062	0.251843	0.243204	0.247792	0.253099	0.243576	0.25566	0.245273	0.249147	0.250601	0.2427	0.252129	0.246308	0.248126	0.261697	0.252208	0.254101	0.255782	0.269132	0.273777	0.24179	0.247193	0.255016	0.252499	0.256284	0.250609	0.258118
78	307	0.25836	0.255451	0.25857	0.258087	0.277889	0.281959	0.26699	0.24541	0.272322	0.267264	0.267329	0.249803	0.251294	0.251495	0.25052	0.250363	0.24903	0.261313	0.26651	0.258421	0.255688	0.247577	0.250765	0.239367	0.240278	0.253365	0.236715	0.257974	0.242867	0.24755	0.246259	0.240378	0.24969	0.241327	0.243024	0.260164	0.25334	0.250724	0.255328	0.268438	0.271563	0.240562	0.2428	0.255241	0.248449	0.252575	0.24988	0.256987
79	309	0.234964	0.238454	0.200081	0.233148	0.225169	0.256559	0.229662	0.244673	0.255177	0.235759	0.238388	0.241356	0.228323	0.245489	0.249867	0.23537	0.253205	0.264451	0.189703	0.218919	0.217457	0.249193	0.255461	0.241643	0.240701	0.249594	0.24213	0.223047	0.241005	0.24609	0.247615	0.233541	0.247856	0.245458	0.248703	0.228417	0.243082	0.250795	0.230627	0.256897	0.23787	0.238425	0.244732	0.231496	0.248105	0.24375	0.219177	0.210392
80	311	0.272151	0.268917	0.2724	0.274124	0.29023	0.294712	0.281709	0.264184	0.286845	0.2827	0.281727	0.266049	0.267283	0.263882	0.264004	0.267556	0.262036	0.272892	0.281193	0.274545	0.27012	0.261345	0.265443	0.256232	0.259723	0.267492	0.256453	0.269591	0.258488	0.265257	0.261755	0.255968	0.266514	0.257265	0.261396	0.275054	0.267113	0.266423	0.273152	0.279899	0.285874	0.2535	0.260321	0.26922	0.264809	0.268767	0.263638	0.270564
81	313	0.255343	0.255305	0.255403	0.256961	0.275882	0.27987	0.266297	0.245114	0.270542	0.266245	0.266769	0.247307	0.248998	0.249801	0.250997	0.250565	0.248378	0.260965	0.263304	0.256906	0.256482	0.24694	0.25	0.236274	0.244382	0.251848	0.239898	0.254634	0.238483	0.245165	0.245715	0.241592	0.248299	0.245617	0.244606	0.259481	0.247661	0.250357	0.254175	0.266511	0.273161	0.237368	0.244278	0.253491	0.249005	0.251244	0.248702	0.255447
82	314	0.254302	0.251955	0.255581	0.255398	0.272221	0.278699	0.264192	0.247299	0.269788	0.265025	0.266275	0.246781	0.249139	0.247594	0.245832	0.244684	0.24784	0.259335	0.263423	0.256662	0.253434	0.243385	0.24649	0.236512	0.24095	0.247334	0.236378	0.254347	0.242246	0.249554	0.244434	0.237557	0.248252	0.241762	0.245266	0.258904	0.247664	0.250912	0.251121	0.263807	0.267868	0.235058	0.244239	0.249513	0.246503	0.250706	0.247659	0.254608
83	318	0.239934	0.245727	0.217724	0.240473	0.238066	0.259897	0.244605	0.247091	0.258198	0.245774	0.249897	0.24639	0.23595	0.246181	0.252079	0.240859	0.255105	0.265291	0.215513	0.231004	0.227767	0.23809	0.244403	0.244392	0.242196	0.230547	0.244939	0.233822	0.245142	0.249111	0.248441	0.240392	0.24954	0.246576	0.248412	0.237154	0.244149	0.254075	0.24166	0.264581	0.250545	0.238113	0.246643	0.236133	0.250928	0.247993	0.226594	0.226904
84	319	0.248199	0.247956	0.2517	0.249148	0.270398	0.276695	0.261281	0.243975	0.267995	0.262074	0.264808	0.244837	0.241263	0.245069	0.245015	0.241021	0.24463	0.257747	0.257754	0.249275	0.248037	0.244356	0.246074	0.239163	0.236094	0.248746	0.2347	0.249708	0.236661	0.242856	0.244819	0.235134	0.246917	0.241539	0.240435	0.254315	0.244766	0.245916	0.251507	0.264133	0.265546	0.233547	0.239201	0.251572	0.248064	0.247915	0.244311	0.250251
85	323	0.242051	0.241784	0.244171	0.243565	0.262681	0.27143	0.256536	0.238205	0.264388	0.254456	0.255816	0.240601	0.235374	0.241063	0.241441	0.231639	0.239719	0.25478	0.247249	0.242583	0.238943	0.236089	0.241661	0.228273	0.233562	0.242692	0.231906	0.241503	0.231498	0.239645	0.239053	0.232457	0.240689	0.237817	0.237818	0.247614	0.231012	0.245557	0.243964	0.261539	0.259688	0.22897	0.234832	0.242234	0.242331	0.241377	0.235507	0.242188
86	326	0.244645	0.244623	0.248661	0.243811	0.265608	0.273587	0.255903	0.239979	0.266162	0.258673	0.260084	0.240939	0.23831	0.241501	0.245738	0.236689	0.239695	0.254103	0.25253	0.245864	0.242638	0.240367	0.241857	0.228025	0.233944	0.245272	0.229265	0.246565	0.232094	0.240554	0.239246	0.227267	0.238998	0.238117	0.238164	0.247371	0.235435	0.244865	0.246274	0.259344	0.262275	0.228112	0.234866	0.246619	0.243841	0.24585	0.23704	0.245989
87	327	0.256076	0.253798	0.254817	0.25608	0.276799	0.283015	0.264841	0.24834	0.273482	0.268626	0.267728	0.25039	0.25307	0.249696	0.247736	0.252259	0.24798	0.261549	0.266524	0.258011	0.253667	0.250852	0.250506	0.239006	0.240733	0.25264	0.239794	0.255884	0.242042	0.247246	0.249141	0.241215	0.251424	0.247131	0.247357	0.259384	0.249662	0.252075	0.256194	0.266942	0.272774	0.237191	0.244967	0.254527	0.250719	0.252576	0.248942	0.256107
88	328	0.25	0.250308	0.222077	0.243258	0.243997	0.267815	0.245441	0.254323	0.267309	0.248533	0.250724	0.248672	0.239458	0.256358	0.259269	0.249725	0.260191	0.269386	0.21418	0.23311	0.233569	0.255858	0.262312	0.24759	0.251185	0.259312	0.252304	0.237647	0.251027	0.255811	0.25385	0.243781	0.256037	0.251599	0.254357	0.240479	0.253523	0.256391	0.242425	0.26143	0.250082	0.248247	0.252083	0.24303	0.254418	0.253652	0.227528	0.228211
89	329	0.255605	0.254379	0.238401	0.252466	0.257094	0.273777	0.255235	0.251841	0.269459	0.256607	0.257227	0.252266	0.247478	0.253837	0.253871	0.25107	0.257118	0.266681	0.236717	0.245452	0.240824	0.253576	0.256782	0.242959	0.248964	0.257939	0.248426	0.2469	0.249718	0.255812	0.252325	0.237284	0.253182	0.249656	0.250666	0.249268	0.253136	0.255559	0.247442	0.263346	0.258872	0.243348	0.250213	0.248348	0.254896	0.254204	0.236833	0.24096
90	331	0.256321	0.253326	0.260047	0.25512	0.276915	0.282732	0.268535	0.249046	0.274335	0.267484	0.269534	0.249437	0.250818	0.251867	0.251618	0.24998	0.255175	0.261106	0.263899	0.259539	0.257649	0.252933	0.255942	0.243942	0.242737	0.256406	0.24642	0.256445	0.243995	0.252634	0.248308	0.239658	0.248341	0.24649	0.246634	0.262852	0.256063	0.253675	0.255284	0.267772	0.27037	0.188866	0.244769	0.256835	0.251884	0.256456	0.24892	0.256871
91	340	0.20984	0.217594	0.164059	0.204368	0.175884	0.237179	0.201461	0.240367	0.236455	0.203118	0.208487	0.232027	0.201889	0.242834	0.250229	0.226981	0.253036	0.263008	0.13178	0.186286	0.183578	0.237868	0.246779	0.238543	0.238165	0.236753	0.243649	0.179674	0.242887	0.241124	0.248033	0.240244	0.238662	0.246873	0.246018	0.198551	0.227307	0.247639	0.206847	0.250092	0.206686	0.2372	0.236934	0.211357	0.242041	0.234318	0.194302	0.175555
92	361	0.258259	0.253801	0.25873	0.259027	0.276045	0.280487	0.264655	0.247574	0.272571	0.265274	0.267987	0.248954	0.253176	0.247307	0.244993	0.249346	0.249502	0.260481	0.264344	0.257816	0.256074	0.253595	0.253765	0.237742	0.243985	0.253109	0.23963	0.254704	0.240711	0.247747	0.245259	0.242417	0.250659	0.239209	0.241269	0.259536	0.253714	0.251121	0.25541	0.263984	0.27269	0.237409	0.243902	0.255899	0.24695	0.253526	0.247463	0.255769
93	364	0.253684	0.249956	0.257175	0.255225	0.275528	0.279841	0.263193	0.2489	0.270492	0.263771	0.265	0.248476	0.245599	0.244431	0.240647	0.244532	0.247336	0.26216	0.262975	0.253689	0.252859	0.246526	0.247634	0.240784	0.239907	0.252254	0.2403	0.254584	0.243409	0.247772	0.24386	0.235546	0.249853	0.244307	0.243136	0.258248	0.247707	0.250465	0.253199	0.26612	0.269975	0.234247	0.242106	0.253436	0.250439	0.250879	0.245966	0.255473
94	365	0.247407	0.250981	0.223351	0.24613	0.217894	0.253355	0.226015	0.256969	0.259098	0.223784	0.230565	0.253696	0.243955	0.257923	0.262313	0.255137	0.266424	0.27499	0.209713	0.234104	0.234778	0.259432	0.263509	0.252635	0.252198	0.261549	0.254941	0.228898	0.255396	0.258879	0.255932	0.24753	0.258112	0.252618	0.25134	0.226657	0.254945	0.262622	0.229863	0.260039	0.227885	0.248891	0.255077	0.248488	0.259869	0.258681	0.23541	0.229911
95	367	0.225671	0.235038	0.178519	0.224823	0.198217	0.246532	0.218494	0.248892	0.251869	0.221713	0.2242	0.239984	0.219481	0.250439	0.255869	0.236644	0.260085	0.269578	0.146116	0.195836	0.193381	0.24895	0.254199	0.246654	0.246236	0.250043	0.251834	0.207021	0.251122	0.251082	0.253503	0.240247	0.247346	0.253833	0.253288	0.21331	0.238265	0.257612	0.226643	0.258641	0.223812	0.243536	0.245837	0.222032	0.251479	0.244152	0.200802	0.193316
96	370	0.253789	0.25151	0.25676	0.252776	0.273596	0.280856	0.26515	0.24883	0.272635	0.265573	0.266196	0.248663	0.24698	0.247336	0.247012	0.246951	0.249381	0.26102	0.260934	0.255734	0.25418	0.247018	0.251211	0.239573	0.241942	0.252422	0.243303	0.253928	0.244594	0.24826	0.245551	0.240402	0.249878	0.243674	0.24453	0.257222	0.247275	0.252344	0.253251	0.26671	0.270519	0.236531	0.245117	0.253459	0.248879	0.254592	0.248678	0.253862
97	372	0.239075	0.245156	0.244988	0.239236	0.262974	0.282187	0.264126	0.252681	0.278657	0.265907	0.265187	0.254548	0.234199	0.262896	0.268309	0.238181	0.268245	0.274508	0.242862	0.246812	0.247632	0.260103	0.264062	0.257036	0.253709	0.261456	0.255695	0.252322	0.259706	0.255389	0.264276	0.254463	0.253084	0.26578	0.265395	0.258035	0.240024	0.268246	0.25898	0.280664	0.269393	0.252085	0.255153	0.253582	0.255386	0.261344	0.246227	0.248842
98	374	0.249873	0.247518	0.248783	0.247633	0.270886	0.277664	0.259523	0.244461	0.271626	0.260469	0.264042	0.247484	0.240238	0.249788	0.250757	0.244791	0.249948	0.263084	0.255164	0.252686	0.247848	0.249493	0.253205	0.23848	0.240853	0.255351	0.242364	0.251684	0.240789	0.247864	0.244696	0.234095	0.247539	0.242795	0.245511	0.252007	0.242263	0.249861	0.250487	0.262848	0.265761	0.239708	0.239027	0.24985	0.245259	0.253629	0.241943	0.249531
99	375	0.254556	0.251074	0.254918	0.252094	0.271543	0.277995	0.26185	0.245843	0.270237	0.260405	0.263225	0.247615	0.247604	0.246141	0.246309	0.243879	0.25045	0.259021	0.260506	0.253131	0.250779	0.246282	0.250588	0.236393	0.241924	0.25331	0.239822	0.251311	0.23651	0.246347	0.243911	0.236692	0.249328	0.239173	0.240689	0.254283	0.247232	0.247522	0.247039	0.261792	0.265035	0.235385	0.24346	0.252443	0.246798	0.251761	0.246396	0.253022
100	376	0.257502	0.252743	0.259799	0.256623	0.278422	0.281133	0.263606	0.250062	0.271737	0.264241	0.266347	0.247132	0.249101	0.248377	0.246623	0.244785	0.249814	0.262561	0.265705	0.259464	0.254187	0.249663	0.25278	0.23454	0.242882	0.254385	0.243576	0.2579	0.240457	0.248439	0.244463	0.238338	0.253159	0.239796	0.244167	0.257927	0.250209	0.249022	0.249774	0.266026	0.269291	0.237113	0.245561	0.254421	0.248952	0.253024	0.247588	0.254862
101	379	0.254938	0.25405	0.256382	0.25506	0.276397	0.277355	0.260671	0.246734	0.269447	0.262602	0.265956	0.244122	0.251821	0.248034	0.243284	0.246853	0.2485	0.258433	0.26373	0.254492	0.252273	0.249434	0.251372	0.231681	0.237994	0.254128	0.240476	0.256233	0.234739	0.248245	0.240137	0.237129	0.247732	0.236086	0.235407	0.254215	0.25066	0.245219	0.247946	0.261091	0.267258	0.235988	0.242209	0.252563	0.2454	0.253118	0.24534	0.25313
102	381	0.259145	0.255874	0.257301	0.25706	0.277063	0.283242	0.265798	0.24897	0.275003	0.268677	0.268144	0.252752	0.254398	0.252052	0.250285	0.248778	0.251518	0.2636	0.26629	0.25835	0.256312	0.24979	0.254101	0.238243	0.245185	0.254173	0.243944	0.254335	0.244908	0.251075	0.247517	0.239758	0.252776	0.24471	0.24445	0.261653	0.250103	0.252299	0.25454	0.266904	0.275626	0.24298	0.246703	0.255172	0.250931	0.255628	0.247742	0.258755
103	382	0.250851	0.248847	0.251993	0.248572	0.269945	0.276915	0.261077	0.242839	0.27198	0.260529	0.263367	0.245998	0.24555	0.245862	0.244976	0.244652	0.24963	0.258845	0.254971	0.252232	0.247018	0.247418	0.250443	0.237263	0.240363	0.251169	0.241223	0.25039	0.244659	0.246833	0.244214	0.240065	0.243158	0.242998	0.245153	0.255977	0.24057	0.251238	0.252618	0.264956	0.268053	0.235807	0.241176	0.247544	0.247867	0.251872	0.245066	0.250507
104	383	0.248315	0.248676	0.250922	0.248852	0.268642	0.279782	0.26414	0.244235	0.276102	0.263996	0.266543	0.249322	0.243086	0.25221	0.250147	0.243777	0.256039	0.264906	0.254897	0.252866	0.249703	0.250906	0.255182	0.243145	0.243078	0.25336	0.248595	0.251037	0.247903	0.249646	0.253633	0.242465	0.244049	0.249032	0.251568	0.256435	0.24393	0.25642	0.255726	0.269687	0.26794	0.238864	0.245955	0.247606	0.251656	0.253497	0.242862	0.250493
105	385	0.254157	0.25262	0.244618	0.252345	0.246905	0.268359	0.249101	0.251443	0.265083	0.247756	0.252538	0.249341	0.243941	0.253523	0.251285	0.247289	0.254615	0.265601	0.240923	0.247661	0.244069	0.254216	0.255099	0.238692	0.243975	0.25726	0.244343	0.243389	0.245033	0.253769	0.248664	0.23976	0.253047	0.24267	0.246656	0.247915	0.252868	0.254659	0.241304	0.261812	0.251951	0.242426	0.248146	0.249471	0.25072	0.25456	0.240567	0.246038
106	386	0.260328	0.256712	0.260811	0.258331	0.27981	0.283451	0.266532	0.25023	0.274548	0.265097	0.270574	0.249767	0.252133	0.249385	0.248856	0.2489	0.252018	0.260785	0.267069	0.260864	0.259964	0.251427	0.252357	0.237319	0.243502	0.256222	0.240653	0.258564	0.240689	0.251367	0.242449	0.235988	0.252029	0.240032	0.245409	0.26072	0.2523	0.251358	0.254766	0.264471	0.270979	0.237356	0.246727	0.25496	0.249421	0.253707	0.250033	0.25821
107	387	0.258015	0.25568	0.259377	0.258244	0.276849	0.278757	0.263313	0.246755	0.273023	0.264051	0.266054	0.2466	0.250691	0.248227	0.245351	0.250611	0.24863	0.259726	0.267246	0.258847	0.254966	0.249947	0.252296	0.234984	0.241816	0.256522	0.239621	0.256494	0.237062	0.249896	0.245995	0.231671	0.254109	0.235059	0.24109	0.25575	0.251841	0.245469	0.247208	0.259671	0.270464	0.236729	0.243124	0.257116	0.247349	0.252297	0.246765	0.257843
108	389	0.261634	0.257575	0.26292	0.259977	0.279304	0.282238	0.26544	0.248518	0.2743	0.263985	0.26964	0.251538	0.253476	0.251016	0.244426	0.249047	0.252525	0.261114	0.268252	0.261739	0.258455	0.256484	0.256298	0.234117	0.244238	0.259238	0.245126	0.257941	0.242706	0.251539	0.245061	0.239466	0.253126	0.239828	0.243045	0.258663	0.254014	0.251679	0.254851	0.264707	0.27213	0.238157	0.243485	0.25801	0.252422	0.260209	0.251102	0.26039
109	390	0.210616	0.226666	0.157514	0.215234	0.181664	0.236193	0.208405	0.246574	0.243174	0.209879	0.215746	0.233663	0.207772	0.248819	0.25624	0.231822	0.257017	0.265443	0.114738	0.177414	0.176776	0.2453	0.250106	0.246767	0.240987	0.245964	0.245233	0.181222	0.249503	0.247177	0.252825	0.233679	0.245702	0.251163	0.250312	0.200403	0.231463	0.256125	0.217537	0.254191	0.209979	0.238822	0.242425	0.213505	0.246835	0.237061	0.187323	0.171629
110	391	0.256874	0.25439	0.257323	0.256813	0.275972	0.27906	0.263419	0.242352	0.270741	0.263327	0.266523	0.24693	0.249412	0.248785	0.246075	0.245946	0.249261	0.260177	0.263663	0.255324	0.251854	0.248442	0.250943	0.235434	0.239886	0.251854	0.239987	0.255274	0.240371	0.249325	0.245608	0.238506	0.247949	0.241569	0.241248	0.258762	0.250415	0.249215	0.252558	0.26569	0.269351	0.234735	0.243705	0.255135	0.24645	0.252106	0.246565	0.256534
111	393	0.255333	0.256997	0.247207	0.257701	0.258426	0.271976	0.254778	0.256588	0.270491	0.251304	0.25596	0.256483	0.251461	0.257378	0.258251	0.253572	0.260716	0.271164	0.247542	0.252701	0.249415	0.256778	0.261207	0.246613	0.253851	0.263056	0.249307	0.25072	0.251455	0.25924	0.256626	0.245863	0.257953	0.248931	0.256165	0.247753	0.25612	0.260694	0.247946	0.266588	0.259874	0.246042	0.255415	0.254606	0.257003	0.259562	0.245886	0.247597
112	395	0.258804	0.254121	0.26031	0.258587	0.279952	0.281035	0.265546	0.249427	0.271824	0.265502	0.265859	0.249162	0.250469	0.248458	0.244478	0.251719	0.249351	0.260727	0.266515	0.257673	0.254481	0.251336	0.252425	0.235169	0.24227	0.256984	0.240334	0.256529	0.23837	0.249418	0.243273	0.231455	0.250571	0.238983	0.241842	0.255736	0.252392	0.247135	0.251824	0.260336	0.269631	0.237349	0.244678	0.256326	0.248558	0.255266	0.246188	0.257729
113	398	0.250046	0.251772	0.228916	0.245473	0.225654	0.258957	0.235872	0.256069	0.263464	0.239079	0.240255	0.255419	0.246457	0.258918	0.262733	0.254818	0.26662	0.274063	0.215846	0.238828	0.233409	0.257646	0.263155	0.251068	0.252918	0.260526	0.257797	0.233593	0.253416	0.261987	0.258806	0.251356	0.259468	0.256942	0.255667	0.231949	0.257185	0.262939	0.238908	0.261476	0.24041	0.248139	0.255896	0.25035	0.258991	0.259513	0.23592	0.231766
114	399	0.257674	0.255107	0.261152	0.258192	0.275992	0.279703	0.266304	0.246372	0.272324	0.26505	0.268976	0.246478	0.254899	0.250228	0.247854	0.249637	0.251545	0.260358	0.267021	0.26046	0.25547	0.250947	0.254673	0.237587	0.24533	0.255745	0.243922	0.257166	0.235662	0.250507	0.244882	0.235391	0.254638	0.237003	0.240299	0.25888	0.254844	0.247625	0.250186	0.264831	0.269458	0.239944	0.247827	0.255539	0.251177	0.253077	0.249147	0.255909
115	400	0.249041	0.251556	0.254227	0.251844	0.273766	0.285093	0.268901	0.251116	0.279946	0.267699	0.270455	0.253739	0.245081	0.259116	0.257902	0.24517	0.26204	0.268592	0.258067	0.255759	0.253244	0.256491	0.259396	0.25113	0.251638	0.259866	0.25375	0.256041	0.252073	0.257574	0.259078	0.242151	0.250163	0.255585	0.259879	0.258152	0.247199	0.263581	0.258771	0.276218	0.272768	0.245822	0.253185	0.25294	0.254549	0.256756	0.247867	0.254866
116	402	0.260011	0.255951	0.257536	0.257935	0.2743	0.280202	0.263059	0.250151	0.2724	0.2617	0.26611	0.255752	0.250933	0.248858	0.245713	0.249493	0.252335	0.262684	0.26402	0.257646	0.25472	0.247256	0.253443	0.236662	0.244772	0.258121	0.242066	0.255142	0.242429	0.250401	0.246359	0.236307	0.253356	0.239769	0.24226	0.256457	0.253148	0.25097	0.249823	0.261109	0.26883	0.236471	0.246528	0.25552	0.250242	0.255226	0.242914	0.253801
117	404	0.253284	0.253212	0.239971	0.253413	0.240925	0.267425	0.249187	0.25368	0.268722	0.247796	0.249277	0.250963	0.248224	0.252933	0.253096	0.255135	0.257941	0.268398	0.236813	0.245324	0.242751	0.256513	0.259967	0.241852	0.251621	0.259708	0.251417	0.241488	0.246363	0.257092	0.251721	0.243581	0.256186	0.248514	0.252334	0.24085	0.254804	0.255152	0.240065	0.262917	0.249694	0.246325	0.254666	0.248337	0.255701	0.254282	0.234057	0.240713
118	406	0.250096	0.252867	0.226875	0.24965	0.221051	0.258031	0.235468	0.261386	0.263233	0.236222	0.236616	0.257138	0.246122	0.259259	0.263286	0.252955	0.266505	0.274323	0.215271	0.237425	0.234328	0.260673	0.267268	0.253013	0.255399	0.261938	0.259491	0.233951	0.256602	0.263153	0.260349	0.244899	0.261913	0.257512	0.257214	0.228615	0.254179	0.263096	0.23458	0.263513	0.239681	0.250877	0.257259	0.249523	0.261028	0.258767	0.233744	0.23195
119	410	0.243818	0.248557	0.247452	0.246324	0.266248	0.27611	0.258138	0.241591	0.271066	0.260281	0.265738	0.248112	0.242155	0.248892	0.249602	0.239451	0.252201	0.259822	0.253447	0.247059	0.245681	0.246338	0.247736	0.240482	0.24042	0.247731	0.240225	0.247067	0.247298	0.245721	0.248039	0.239085	0.237607	0.247275	0.249128	0.255232	0.24052	0.253282	0.252649	0.26812	0.264886	0.236712	0.243005	0.243763	0.245571	0.245296	0.238023	0.247954
120	411	0.260254	0.255765	0.260859	0.256599	0.279566	0.284641	0.266202	0.250342	0.276954	0.26736	0.270344	0.250687	0.254411	0.255147	0.249983	0.251305	0.2529	0.264737	0.26861	0.261145	0.258386	0.252093	0.255817	0.237019	0.244657	0.260085	0.245201	0.261489	0.241657	0.249715	0.246764	0.242192	0.254682	0.243273	0.242699	0.258289	0.255913	0.252807	0.253249	0.264898	0.274567	0.242847	0.251163	0.257555	0.252361	0.256191	0.248377	0.260194
121	414	0.245358	0.248259	0.246635	0.245646	0.266494	0.27729	0.261389	0.2444	0.27174	0.262146	0.265176	0.248887	0.241107	0.250606	0.253047	0.238782	0.253912	0.263207	0.253438	0.248917	0.247968	0.248685	0.25121	0.24278	0.240936	0.250202	0.241911	0.249516	0.24848	0.245925	0.250839	0.244721	0.243901	0.248232	0.249437	0.256433	0.239089	0.254397	0.253011	0.27009	0.26664	0.239127	0.243529	0.244468	0.247892	0.247361	0.24195	0.249108
122	415	0.249101	0.256506	0.21803	0.250829	0.204809	0.252196	0.230134	0.264815	0.262975	0.227863	0.231619	0.260918	0.246334	0.266732	0.272099	0.254734	0.27485	0.282755	0.200034	0.233577	0.233568	0.266005	0.270779	0.260109	0.2622	0.266134	0.264967	0.228726	0.264811	0.26583	0.26966	0.252743	0.267262	0.267281	0.268343	0.224159	0.259699	0.272348	0.232808	0.269254	0.228594	0.259942	0.263886	0.250161	0.268755	0.261699	0.234737	0.226516
123	419	0.263289	0.265952	0.240796	0.262827	0.239371	0.272127	0.253888	0.271841	0.276639	0.253402	0.253884	0.26732	0.258178	0.273167	0.276818	0.268143	0.27978	0.287175	0.23327	0.252907	0.251379	0.274749	0.277565	0.264896	0.268325	0.276218	0.26905	0.247834	0.267204	0.275559	0.273755	0.26005	0.27318	0.270478	0.271769	0.244991	0.270942	0.274961	0.248424	0.275415	0.25436	0.264508	0.27063	0.264086	0.274506	0.270943	0.24992	0.245618
124	42	0.264486	0.264726	0.264597	0.265831	0.284242	0.282645	0.276204	0.258599	0.27758	0.276046	0.277866	0.26086	0.258173	0.255683	0.260815	0.262596	0.264031	0.273496	0.271244	0.266359	0.262827	0.250633	0.253617	0.252064	0.256056	0.240589	0.257324	0.264573	0.252221	0.261686	0.261252	0.248308	0.260789	0.255695	0.257432	0.268336	0.263171	0.263957	0.263956	0.277597	0.28062	0.253755	0.25627	0.264844	0.263162	0.266578	0.258869	0.265064
125	420	0.257106	0.254687	0.249227	0.25453	0.262602	0.273267	0.2536	0.251925	0.268437	0.254377	0.256376	0.249919	0.253359	0.251284	0.251756	0.250438	0.255827	0.262496	0.249935	0.251496	0.248682	0.254874	0.257271	0.242518	0.247736	0.260137	0.24775	0.246782	0.245043	0.253219	0.248772	0.242612	0.253302	0.244177	0.245349	0.246353	0.254542	0.254216	0.242782	0.263472	0.256969	0.24248	0.249288	0.256552	0.25712	0.256098	0.242831	0.247036
126	427	0.256082	0.254189	0.254827	0.256881	0.268862	0.275429	0.260332	0.250524	0.270712	0.261086	0.262774	0.24785	0.251038	0.249067	0.24811	0.253427	0.254278	0.264821	0.25952	0.257926	0.252896	0.252089	0.255178	0.23862	0.247324	0.257094	0.24266	0.252926	0.243433	0.254261	0.246443	0.234899	0.253332	0.243523	0.246187	0.255087	0.256244	0.25171	0.253054	0.262708	0.264718	0.240751	0.247556	0.255234	0.252315	0.252105	0.244524	0.252549
127	428	0.252822	0.251546	0.253895	0.251521	0.271937	0.27706	0.263589	0.245928	0.26965	0.262827	0.266038	0.246675	0.246933	0.243719	0.245091	0.244616	0.249512	0.259098	0.259437	0.254353	0.249024	0.247862	0.250747	0.239084	0.240532	0.251665	0.24001	0.25074	0.242195	0.249129	0.246143	0.233251	0.24481	0.242345	0.245013	0.25566	0.24801	0.248834	0.252888	0.265548	0.267029	0.236985	0.242055	0.25225	0.249572	0.250611	0.244199	0.252469
128	430	0.25694	0.254486	0.259355	0.256969	0.274637	0.279677	0.262881	0.249263	0.271793	0.261618	0.264446	0.247675	0.252848	0.247088	0.242841	0.251759	0.250567	0.260119	0.265034	0.259769	0.254795	0.249559	0.253329	0.235642	0.24528	0.256197	0.241149	0.255131	0.237855	0.250761	0.242212	0.235874	0.250821	0.239218	0.239874	0.25727	0.249166	0.245013	0.24902	0.262925	0.267886	0.234819	0.243866	0.255453	0.245575	0.254565	0.249325	0.256182
129	432	0.244022	0.247233	0.21949	0.243594	0.209688	0.249825	0.225997	0.253449	0.255307	0.226251	0.229526	0.249336	0.239414	0.253903	0.260536	0.244721	0.261951	0.272335	0.205601	0.229686	0.229765	0.254216	0.260211	0.247215	0.248044	0.258953	0.251772	0.225318	0.251307	0.256808	0.255011	0.243062	0.255917	0.250975	0.255367	0.219164	0.249654	0.257629	0.223689	0.258157	0.231025	0.244284	0.249604	0.244847	0.254871	0.253623	0.227215	0.223561
130	433	0.245563	0.245687	0.217894	0.241159	0.214381	0.25393	0.22348	0.255292	0.254863	0.226029	0.2306	0.249107	0.238764	0.253684	0.2591	0.250682	0.26229	0.271114	0.206696	0.227539	0.229243	0.254591	0.258576	0.246517	0.250258	0.257702	0.252452	0.222867	0.251225	0.255881	0.252327	0.239959	0.255534	0.251545	0.250901	0.219465	0.253424	0.259631	0.229097	0.25766	0.228401	0.246378	0.248943	0.24755	0.257972	0.253642	0.226083	0.223812
131	435	0.232781	0.245756	0.192676	0.241134	0.180116	0.232952	0.201163	0.258231	0.248	0.205472	0.208498	0.247712	0.228841	0.257252	0.270177	0.24182	0.270061	0.279522	0.169374	0.210003	0.216723	0.257284	0.262017	0.251181	0.253176	0.255696	0.262777	0.214836	0.259578	0.261512	0.2648	0.243964	0.256931	0.262882	0.263606	0.203216	0.240884	0.265813	0.211512	0.256915	0.191088	0.243774	0.254514	0.236145	0.266234	0.254883	0.217201	0.204009
132	438	0.256465	0.253571	0.254939	0.255303	0.274909	0.278507	0.261914	0.242543	0.269254	0.264425	0.26795	0.246355	0.250576	0.24567	0.24541	0.249861	0.248264	0.257693	0.266002	0.256585	0.252739	0.248947	0.251561	0.231271	0.237286	0.253688	0.238655	0.253065	0.23908	0.248228	0.241077	0.233932	0.249642	0.235903	0.238103	0.256803	0.25274	0.244358	0.247613	0.259418	0.268165	0.234085	0.243804	0.256843	0.247421	0.25198	0.246671	0.254677
133	439	0.257197	0.255904	0.258313	0.257084	0.276005	0.277516	0.264888	0.250394	0.269645	0.266219	0.266486	0.249956	0.252694	0.247588	0.253249	0.252289	0.252176	0.262694	0.263596	0.25836	0.256487	0.240175	0.245056	0.243313	0.244784	0.236438	0.244868	0.256773	0.244732	0.250556	0.246127	0.24232	0.250282	0.244773	0.248275	0.261653	0.255588	0.25281	0.252697	0.266378	0.271473	0.24086	0.246373	0.255	0.25206	0.254604	0.247697	0.255749
134	441	0.248105	0.242117	0.248875	0.24459	0.266242	0.268575	0.250439	0.237143	0.262205	0.254267	0.257105	0.236618	0.241344	0.236126	0.234629	0.238573	0.240519	0.251783	0.254603	0.248778	0.244656	0.242107	0.244054	0.222597	0.230502	0.248008	0.22735	0.246069	0.229317	0.241355	0.229696	0.220762	0.242519	0.227172	0.228362	0.242482	0.244065	0.236382	0.238277	0.252948	0.258547	0.227684	0.231973	0.245171	0.238959	0.244789	0.235903	0.24229
135	442	0.243448	0.247898	0.249037	0.241216	0.265354	0.27195	0.263609	0.253002	0.266615	0.261384	0.264062	0.246052	0.238946	0.247632	0.255582	0.246074	0.258983	0.269614	0.250168	0.252149	0.251452	0.236831	0.242022	0.246484	0.248224	0.225213	0.251168	0.248764	0.250072	0.252817	0.253975	0.239955	0.252319	0.249834	0.253494	0.257202	0.250083	0.259326	0.255206	0.271817	0.267556	0.244814	0.248292	0.250859	0.252389	0.256983	0.246333	0.249411
136	445	0.251073	0.249294	0.241871	0.249955	0.25729	0.271289	0.252934	0.247516	0.268079	0.250603	0.254931	0.248077	0.243581	0.249861	0.248249	0.244544	0.251711	0.260889	0.247382	0.250992	0.248398	0.249463	0.250383	0.237897	0.242946	0.252381	0.234228	0.250566	0.237796	0.247741	0.240837	0.238608	0.2495	0.24002	0.23997	0.247773	0.247496	0.250399	0.241531	0.255332	0.258431	0.236999	0.245164	0.248973	0.248999	0.25209	0.239497	0.244265
137	446	0.259249	0.255933	0.260996	0.25438	0.277909	0.280475	0.266283	0.247898	0.273475	0.264718	0.265255	0.247586	0.251468	0.246931	0.245418	0.250819	0.251806	0.260128	0.267526	0.260188	0.255805	0.25163	0.25405	0.236543	0.242267	0.25584	0.238915	0.257107	0.241274	0.249893	0.244427	0.23449	0.250874	0.238504	0.237582	0.257486	0.252572	0.249345	0.252339	0.260929	0.269845	0.235946	0.245471	0.255032	0.247202	0.25504	0.249183	0.257161
138	448	0.259585	0.257428	0.259123	0.260176	0.278324	0.281628	0.268015	0.247892	0.272095	0.26539	0.269104	0.248565	0.253833	0.250989	0.24783	0.253009	0.252021	0.259265	0.266328	0.259082	0.256675	0.252825	0.252405	0.239125	0.245177	0.254342	0.2457	0.258519	0.243429	0.249801	0.243037	0.238547	0.252163	0.241916	0.245469	0.260461	0.256414	0.250818	0.253793	0.263074	0.272666	0.241045	0.247271	0.258146	0.249167	0.25635	0.249989	0.259354
139	449	0.258014	0.254814	0.258348	0.257074	0.27411	0.279238	0.264594	0.24864	0.271988	0.26372	0.265849	0.251394	0.250309	0.250917	0.24593	0.248155	0.247774	0.261133	0.264416	0.258993	0.255996	0.246963	0.253789	0.235888	0.242141	0.254607	0.238936	0.255246	0.23962	0.24916	0.245578	0.239006	0.251703	0.240212	0.240563	0.257009	0.251374	0.249162	0.252257	0.264619	0.271028	0.235787	0.246179	0.258336	0.250339	0.255313	0.249634	0.258558
140	45	0.247685	0.247161	0.24857	0.248064	0.267067	0.268748	0.254994	0.244291	0.262171	0.257796	0.261763	0.241161	0.24403	0.241433	0.246075	0.242842	0.247506	0.257417	0.253164	0.248641	0.246418	0.235484	0.239061	0.235319	0.236874	0.23294	0.236433	0.245421	0.235754	0.245323	0.240399	0.231498	0.246087	0.237049	0.23726	0.251596	0.243632	0.247152	0.245504	0.262041	0.261759	0.231293	0.237931	0.248501	0.245198	0.248388	0.238988	0.248664
141	453	0.255686	0.251446	0.246653	0.258117	0.265483	0.275036	0.257734	0.252588	0.270695	0.25619	0.262194	0.249511	0.24728	0.252858	0.24763	0.251587	0.252864	0.264189	0.251885	0.254163	0.2495	0.252012	0.255878	0.241255	0.244696	0.255554	0.244008	0.251524	0.240918	0.252875	0.248981	0.238834	0.255759	0.245325	0.245236	0.252727	0.254728	0.2521	0.249129	0.264102	0.262811	0.238805	0.24721	0.249229	0.25261	0.255318	0.241537	0.248573
142	457	0.236609	0.237584	0.235923	0.238167	0.25002	0.267278	0.247126	0.233465	0.263973	0.248841	0.250722	0.240008	0.229046	0.241915	0.243883	0.231549	0.248541	0.253352	0.232971	0.238238	0.232815	0.237365	0.242888	0.231454	0.233496	0.242145	0.234812	0.235239	0.238081	0.237849	0.239981	0.222918	0.234188	0.237005	0.241979	0.236752	0.230766	0.246325	0.240032	0.257487	0.252177	0.225621	0.23484	0.238702	0.236546	0.244611	0.230086	0.233524
143	458	0.256877	0.254982	0.255473	0.256951	0.27267	0.279035	0.263297	0.245934	0.270523	0.26508	0.26455	0.246273	0.250224	0.248008	0.244509	0.249271	0.248722	0.259366	0.263187	0.255931	0.253199	0.248289	0.251458	0.234915	0.239524	0.254278	0.240452	0.254431	0.240608	0.246405	0.246139	0.234538	0.250069	0.242945	0.243529	0.256747	0.252013	0.248571	0.24909	0.262851	0.267739	0.234668	0.24421	0.255229	0.250835	0.252905	0.246741	0.25632
144	459	0.256056	0.258124	0.241334	0.259304	0.248116	0.27192	0.250417	0.257995	0.268613	0.250605	0.25262	0.254569	0.250154	0.259954	0.260014	0.256859	0.264379	0.271378	0.236486	0.249595	0.247211	0.259147	0.262527	0.251117	0.253385	0.26354	0.255239	0.24545	0.256344	0.260149	0.257718	0.243625	0.258841	0.255165	0.258381	0.242518	0.26012	0.263377	0.243654	0.267058	0.254691	0.252393	0.257223	0.255211	0.259118	0.258879	0.239077	0.24299
145	460	0.251746	0.255556	0.231048	0.251144	0.226856	0.261304	0.237734	0.26261	0.267179	0.238585	0.23984	0.256833	0.249279	0.262553	0.268473	0.258146	0.269521	0.27907	0.213991	0.23983	0.237771	0.264652	0.26908	0.258092	0.260014	0.266896	0.26357	0.236449	0.262065	0.263314	0.264781	0.254184	0.262603	0.263206	0.265139	0.234661	0.261001	0.268311	0.23885	0.267748	0.240837	0.255019	0.260467	0.254212	0.264177	0.264316	0.240452	0.233617
146	462	0.228827	0.237951	0.193156	0.227345	0.213823	0.253516	0.227908	0.246636	0.257179	0.228146	0.230981	0.24226	0.223501	0.250976	0.25176	0.238522	0.254498	0.265074	0.177107	0.207572	0.208118	0.247287	0.251969	0.241311	0.246745	0.251014	0.242058	0.214567	0.244019	0.248131	0.246789	0.232477	0.244827	0.246473	0.250978	0.218153	0.24006	0.250817	0.223158	0.255081	0.231751	0.24388	0.247073	0.228409	0.247278	0.241564	0.210622	0.1991
147	465	0.250963	0.244506	0.241824	0.249414	0.250839	0.267713	0.248432	0.245872	0.263377	0.250342	0.253092	0.243414	0.246453	0.244559	0.243985	0.24519	0.249474	0.259248	0.242912	0.24555	0.245853	0.245888	0.248451	0.234261	0.23849	0.250943	0.237725	0.242519	0.237584	0.245363	0.241704	0.23295	0.249255	0.239108	0.2381	0.243681	0.24668	0.244939	0.244735	0.256753	0.254875	0.23186	0.241216	0.246551	0.244833	0.249871	0.238603	0.241642
148	467	0.257275	0.254451	0.262922	0.258189	0.279886	0.28321	0.265145	0.250762	0.273634	0.268495	0.268514	0.25218	0.253078	0.248619	0.246889	0.249851	0.250729	0.260138	0.269763	0.260794	0.256701	0.251802	0.253714	0.238693	0.245804	0.256297	0.243333	0.259501	0.238715	0.250026	0.243796	0.237523	0.250505	0.241948	0.242011	0.262456	0.253133	0.248253	0.253908	0.265126	0.272862	0.235909	0.245448	0.258562	0.250937	0.253942	0.247486	0.257558
149	47	0.25521	0.257905	0.239611	0.254185	0.243945	0.265041	0.253772	0.258002	0.266599	0.252494	0.254578	0.256464	0.250193	0.257652	0.26238	0.255237	0.266543	0.273904	0.239641	0.248431	0.248861	0.249349	0.254175	0.25359	0.254496	0.242918	0.256098	0.246502	0.258791	0.260588	0.260864	0.249662	0.260029	0.256245	0.259564	0.217288	0.259264	0.264409	0.251445	0.271273	0.256702	0.251903	0.256981	0.251861	0.260879	0.258877	0.246102	0.248082
150	470	0.23762	0.237833	0.247481	0.234592	0.263901	0.273846	0.262577	0.249515	0.269424	0.262859	0.264182	0.239139	0.230069	0.247537	0.253216	0.243823	0.256418	0.26784	0.249162	0.250251	0.249506	0.240979	0.243697	0.245997	0.246125	0.232253	0.249662	0.248842	0.250782	0.252419	0.255036	0.242891	0.250528	0.252749	0.251849	0.257357	0.248594	0.258478	0.256917	0.27147	0.268314	0.243737	0.249223	0.250935	0.25268	0.25374	0.241176	0.248196
151	48	0.251377	0.253952	0.239337	0.253128	0.243546	0.264832	0.246965	0.256526	0.264962	0.248581	0.250859	0.254435	0.249446	0.255691	0.260501	0.252691	0.263186	0.272617	0.235301	0.245722	0.24274	0.252899	0.257987	0.250237	0.252584	0.251775	0.25321	0.241447	0.249775	0.257635	0.25539	0.247656	0.257693	0.254802	0.253311	0.212258	0.254816	0.260264	0.24607	0.270023	0.25353	0.248745	0.251097	0.252182	0.254949	0.257014	0.241585	0.243807
152	484	0.244206	0.245993	0.220079	0.242121	0.219282	0.255496	0.231517	0.253341	0.259737	0.235561	0.236136	0.248065	0.239252	0.251992	0.256019	0.24711	0.262153	0.273549	0.207927	0.232831	0.232124	0.255952	0.262951	0.249775	0.249481	0.257605	0.253924	0.22921	0.253046	0.257885	0.256088	0.2427	0.254519	0.256478	0.254214	0.229123	0.248607	0.261267	0.232235	0.260922	0.235913	0.247954	0.25296	0.243251	0.258856	0.253644	0.228581	0.226431
153	485	0.263692	0.257637	0.264012	0.262006	0.278653	0.283667	0.264909	0.24993	0.274318	0.268885	0.269934	0.251277	0.255	0.25154	0.246719	0.254322	0.252308	0.259874	0.271488	0.263811	0.258696	0.253765	0.255383	0.238765	0.242953	0.261401	0.243149	0.260724	0.241526	0.251379	0.246086	0.238913	0.253883	0.24175	0.244096	0.259377	0.257404	0.251329	0.251238	0.265623	0.273734	0.241147	0.244409	0.257961	0.251739	0.255572	0.249163	0.258402
154	487	0.257389	0.253329	0.258725	0.256902	0.276929	0.284794	0.267324	0.253174	0.275813	0.26986	0.270841	0.251087	0.25002	0.254722	0.252981	0.249803	0.251095	0.265412	0.266113	0.258594	0.255562	0.250459	0.252396	0.244243	0.247818	0.25638	0.241474	0.255896	0.247324	0.249974	0.248901	0.246459	0.252993	0.250893	0.250028	0.261188	0.250232	0.255	0.256406	0.267928	0.274923	0.242682	0.248929	0.253982	0.252517	0.25581	0.248729	0.260053
155	489	0.248521	0.250066	0.249267	0.247724	0.269124	0.279128	0.263026	0.243146	0.271503	0.262587	0.264087	0.247845	0.242014	0.24975	0.250658	0.241771	0.251835	0.260915	0.254766	0.249887	0.251071	0.246608	0.24987	0.243001	0.239829	0.250295	0.245172	0.246553	0.246783	0.246386	0.247713	0.244203	0.242681	0.246719	0.248564	0.259632	0.240884	0.255851	0.255727	0.270518	0.268581	0.237085	0.243586	0.24551	0.248376	0.247991	0.24307	0.251181
156	492	0.24834	0.251223	0.249917	0.248779	0.27204	0.279096	0.264425	0.246373	0.272753	0.264272	0.265228	0.247648	0.244999	0.250943	0.251349	0.242204	0.25183	0.260983	0.257395	0.250747	0.248153	0.248436	0.250053	0.245638	0.23861	0.250968	0.242753	0.250498	0.249061	0.244269	0.248567	0.240147	0.241978	0.248791	0.246962	0.260821	0.24273	0.255941	0.257412	0.269274	0.269494	0.234808	0.242415	0.241155	0.250095	0.245628	0.239807	0.254103
157	493	0.21875	0.222768	0.241059	0.216523	0.257286	0.27516	0.257973	0.248909	0.272598	0.258944	0.256923	0.225106	0.210163	0.253403	0.251838	0.241746	0.257814	0.268197	0.241522	0.247646	0.244127	0.251748	0.255669	0.244742	0.245368	0.255275	0.249013	0.250683	0.249175	0.251199	0.250199	0.241817	0.24784	0.251497	0.251227	0.25217	0.243716	0.257079	0.247803	0.269226	0.262209	0.244165	0.249329	0.249341	0.249913	0.252988	0.237792	0.241115
158	496	0.241346	0.24763	0.209313	0.238934	0.23119	0.262153	0.242018	0.252865	0.266121	0.241658	0.243852	0.249575	0.234499	0.254861	0.256819	0.247578	0.262115	0.271405	0.194904	0.224438	0.223102	0.254989	0.260341	0.249711	0.250146	0.256881	0.253573	0.230544	0.251642	0.254299	0.256006	0.247081	0.252858	0.254678	0.257162	0.235831	0.24736	0.259958	0.239118	0.265066	0.245184	0.249817	0.251696	0.235819	0.250893	0.251755	0.224602	0.21033
159	5	0.251742	0.248322	0.252562	0.249754	0.27297	0.278126	0.262841	0.244395	0.267684	0.258839	0.263462	0.246317	0.247463	0.244185	0.243385	0.242379	0.245687	0.258133	0.259921	0.251828	0.250583	0.24771	0.251291	0.23274	0.236106	0.250819	0.240225	0.253905	0.238582	0.245818	0.242245	0.238583	0.243625	0.235527	0.235619	0.257317	0.245387	0.249323	0.249283	0.262929	0.26951	0.232765	0.239268	0.251533	0.247677	0.254443	0.243186	0.251234
160	500	0.257117	0.256175	0.257364	0.257131	0.275346	0.280937	0.267095	0.249269	0.268745	0.264492	0.268186	0.250413	0.251646	0.252674	0.249461	0.247625	0.246849	0.260429	0.265047	0.256959	0.255	0.247354	0.24736	0.238892	0.244552	0.25417	0.235048	0.255756	0.241738	0.248856	0.249135	0.24298	0.25038	0.244523	0.245942	0.261728	0.250035	0.252807	0.254956	0.267525	0.270999	0.241426	0.240551	0.253455	0.250207	0.254209	0.246246	0.255187
161	503	0.239069	0.241301	0.237416	0.240041	0.260748	0.263237	0.253242	0.245556	0.254742	0.257782	0.256967	0.243665	0.234518	0.238007	0.250399	0.238654	0.249901	0.26365	0.243714	0.244967	0.240631	0.228241	0.228151	0.24082	0.240872	0.211922	0.242063	0.240587	0.240213	0.241788	0.244163	0.234748	0.246714	0.24407	0.246961	0.250878	0.240846	0.252562	0.245278	0.266871	0.259631	0.232971	0.239723	0.244257	0.246103	0.248767	0.237558	0.241153
162	504	0.252345	0.25147	0.255704	0.253761	0.27486	0.278143	0.263323	0.243037	0.269936	0.265808	0.265648	0.245717	0.249212	0.248076	0.244081	0.245807	0.244755	0.25937	0.26274	0.254879	0.250462	0.24407	0.246413	0.235199	0.242278	0.248584	0.236837	0.249116	0.240307	0.246097	0.242024	0.241691	0.246373	0.242952	0.244139	0.257555	0.249403	0.249965	0.252546	0.266752	0.267194	0.232803	0.24024	0.250522	0.245622	0.250374	0.248255	0.253407
163	506	0.239777	0.245185	0.23608	0.241338	0.258256	0.260857	0.253861	0.244617	0.264284	0.255558	0.25598	0.242168	0.233529	0.239126	0.248472	0.235873	0.251062	0.260156	0.240851	0.241994	0.241913	0.223682	0.229093	0.238428	0.241138	0.209915	0.243153	0.241634	0.241406	0.245508	0.243798	0.23291	0.245247	0.245531	0.245414	0.246825	0.241527	0.254013	0.24747	0.267127	0.261051	0.236223	0.238709	0.243718	0.248164	0.244171	0.236174	0.239177
164	507	0.241101	0.240432	0.241316	0.23667	0.261342	0.2709	0.252806	0.242083	0.262732	0.25309	0.256167	0.24107	0.232751	0.235645	0.239716	0.227668	0.249046	0.258296	0.246198	0.240083	0.242296	0.241452	0.249833	0.231103	0.237793	0.247608	0.237835	0.242424	0.234921	0.240907	0.240118	0.232551	0.243901	0.236209	0.237371	0.245672	0.230351	0.247669	0.240643	0.259606	0.259732	0.228877	0.237689	0.246997	0.244783	0.247275	0.233724	0.241974
165	508	0.245927	0.245468	0.250104	0.246167	0.267162	0.277153	0.261498	0.244751	0.270016	0.260357	0.262914	0.24676	0.243547	0.243907	0.243016	0.231602	0.252669	0.262442	0.253495	0.249047	0.247551	0.248608	0.255926	0.237387	0.238659	0.254348	0.243327	0.248466	0.242597	0.244198	0.248447	0.236084	0.246433	0.243466	0.242536	0.255072	0.233836	0.252728	0.247816	0.265365	0.265125	0.23952	0.243464	0.252392	0.248773	0.250087	0.239513	0.24832
166	509	0.253651	0.252624	0.256345	0.252941	0.275363	0.279617	0.263999	0.244992	0.27128	0.26626	0.266612	0.245804	0.249095	0.245316	0.246094	0.24584	0.248916	0.260086	0.261973	0.253127	0.250422	0.244568	0.246494	0.237813	0.242665	0.24846	0.241205	0.206023	0.240629	0.245027	0.244353	0.238355	0.248843	0.242999	0.244591	0.258486	0.246236	0.250499	0.252111	0.267299	0.271077	0.234725	0.242669	0.251857	0.247348	0.249035	0.24656	0.255234
167	51	0.249669	0.24862	0.24963	0.250916	0.27137	0.275305	0.257762	0.24331	0.266442	0.258647	0.26137	0.24361	0.245569	0.246156	0.246301	0.247064	0.246469	0.254784	0.256571	0.251168	0.249187	0.244514	0.248673	0.234249	0.237105	0.251732	0.235382	0.251715	0.23015	0.24681	0.239774	0.229161	0.244287	0.233874	0.236897	0.25456	0.246104	0.247035	0.24508	0.259738	0.264783	0.233246	0.234762	0.251828	0.246968	0.250037	0.242066	0.250778
168	510	0.252898	0.247291	0.251229	0.249978	0.270341	0.27624	0.260396	0.244313	0.267391	0.261661	0.26518	0.24357	0.242702	0.24506	0.241201	0.244827	0.248492	0.258543	0.26052	0.251827	0.251249	0.243457	0.248431	0.233914	0.237743	0.250288	0.235047	0.250241	0.238504	0.245964	0.239704	0.231644	0.247988	0.237846	0.238322	0.256746	0.244255	0.244854	0.249758	0.262932	0.265977	0.229956	0.241171	0.250375	0.243771	0.246515	0.241136	0.251015
169	511	0.238048	0.246879	0.208567	0.238632	0.229794	0.262215	0.238511	0.252345	0.261688	0.239061	0.241739	0.247724	0.233016	0.254064	0.257548	0.240631	0.261209	0.269449	0.18673	0.219689	0.214853	0.253856	0.256563	0.252077	0.248435	0.25306	0.252518	0.22756	0.250838	0.250528	0.25611	0.242893	0.252731	0.255851	0.2547	0.232487	0.24444	0.260049	0.237318	0.26046	0.244704	0.240507	0.250896	0.237375	0.252415	0.250037	0.218333	0.215755
170	512	0.253776	0.252194	0.255737	0.253024	0.275695	0.281849	0.267472	0.250193	0.274749	0.270083	0.268402	0.251909	0.247564	0.251613	0.24795	0.24181	0.250327	0.263081	0.262612	0.253335	0.252003	0.250202	0.252557	0.243132	0.246689	0.254045	0.244763	0.254124	0.244776	0.246091	0.250594	0.241723	0.248957	0.247224	0.251176	0.259024	0.246591	0.255615	0.257705	0.271393	0.274843	0.241067	0.247411	0.253495	0.253241	0.253436	0.246614	0.255436
171	513	0.237138	0.238584	0.233869	0.234768	0.254873	0.268154	0.248707	0.236975	0.25671	0.245011	0.249264	0.239498	0.227722	0.239112	0.233391	0.226998	0.244148	0.252748	0.235175	0.232709	0.232319	0.238853	0.244486	0.230871	0.22907	0.241317	0.23948	0.230135	0.230254	0.239007	0.236243	0.220427	0.238834	0.233815	0.236241	0.238937	0.227901	0.244897	0.235839	0.256696	0.249954	0.223905	0.233416	0.238348	0.241458	0.244655	0.227417	0.233604
172	514	0.246096	0.248514	0.244909	0.247651	0.263922	0.264053	0.258835	0.245667	0.256501	0.260313	0.260936	0.243934	0.240932	0.239971	0.247698	0.23984	0.251047	0.261416	0.250203	0.247618	0.245003	0.22558	0.230163	0.237792	0.241825	0.210606	0.241711	0.244183	0.240483	0.247268	0.247051	0.236591	0.245966	0.245322	0.246484	0.254867	0.243422	0.252488	0.248392	0.267136	0.264556	0.233426	0.241838	0.247149	0.246209	0.248513	0.242535	0.249274
173	516	0.256012	0.255307	0.259791	0.254807	0.275934	0.282873	0.265655	0.250363	0.271703	0.267195	0.267998	0.249128	0.24617	0.251418	0.248564	0.247964	0.252875	0.264819	0.264519	0.256619	0.254356	0.249063	0.251592	0.239242	0.244449	0.255966	0.241756	0.254862	0.244495	0.249284	0.250201	0.241444	0.250143	0.246776	0.247318	0.26024	0.248741	0.253006	0.255312	0.265962	0.272701	0.238936	0.246803	0.256581	0.251092	0.254378	0.24908	0.257001
174	518	0.244256	0.245902	0.245795	0.245171	0.264941	0.271749	0.255779	0.242433	0.266494	0.25667	0.257502	0.237856	0.239459	0.239354	0.24264	0.238655	0.243541	0.254709	0.251376	0.244682	0.245311	0.240015	0.242986	0.232679	0.232978	0.246023	0.232228	0.246367	0.230642	0.23887	0.237016	0.227106	0.242241	0.237475	0.238238	0.251523	0.239429	0.243932	0.243843	0.260283	0.263651	0.225298	0.234805	0.24678	0.241594	0.243722	0.239271	0.245799
175	519	0.254851	0.25126	0.252651	0.252883	0.272256	0.278599	0.261425	0.247596	0.270191	0.263386	0.264963	0.248297	0.243927	0.246776	0.244572	0.246535	0.248761	0.261036	0.262368	0.253157	0.250167	0.24471	0.247833	0.234259	0.243404	0.251476	0.237889	0.252251	0.240762	0.245123	0.243704	0.235642	0.24721	0.244108	0.242885	0.254134	0.246229	0.249242	0.250014	0.264277	0.269931	0.235639	0.243844	0.251077	0.245627	0.251295	0.242502	0.253912
176	523	0.249396	0.248421	0.248707	0.248265	0.271613	0.274475	0.25908	0.245064	0.265456	0.261796	0.261735	0.245856	0.245422	0.245386	0.243723	0.238947	0.246493	0.258692	0.255729	0.249369	0.247047	0.242403	0.245349	0.236237	0.240038	0.248362	0.235549	0.245914	0.239033	0.242576	0.242841	0.236623	0.24433	0.241176	0.239719	0.251756	0.241717	0.246034	0.246132	0.263648	0.265986	0.229675	0.238548	0.248214	0.243486	0.247722	0.241107	0.248966
177	527	0.255941	0.255634	0.256319	0.253931	0.273724	0.281167	0.262836	0.248419	0.273663	0.267334	0.266715	0.248358	0.248773	0.252622	0.251328	0.247342	0.250638	0.259602	0.26326	0.255305	0.251458	0.247641	0.251524	0.240966	0.243896	0.252451	0.242553	0.253294	0.239761	0.249611	0.246893	0.240098	0.248457	0.244703	0.24674	0.259776	0.251306	0.250962	0.254132	0.266276	0.270039	0.23602	0.245314	0.254797	0.249339	0.250614	0.24522	0.25701
178	540	0.248878	0.25303	0.247791	0.25072	0.26774	0.269429	0.263628	0.251551	0.259595	0.263552	0.266191	0.248438	0.245614	0.243772	0.253851	0.245613	0.256883	0.267468	0.252931	0.250382	0.249701	0.22712	0.234959	0.245611	0.24635	0.203147	0.247619	0.248766	0.24596	0.251063	0.249844	0.241775	0.251141	0.249535	0.253206	0.26113	0.249785	0.258482	0.256879	0.274028	0.267473	0.244972	0.24497	0.251467	0.25364	0.253369	0.246094	0.251417
179	541	0.249036	0.250815	0.247482	0.251701	0.264358	0.265183	0.261518	0.248818	0.262165	0.262231	0.263014	0.247304	0.243298	0.241275	0.252062	0.24312	0.253768	0.266214	0.250714	0.248946	0.24684	0.229123	0.234277	0.243121	0.244461	0.21192	0.247278	0.246907	0.242762	0.248693	0.248905	0.240631	0.250362	0.249791	0.249941	0.255369	0.247243	0.256503	0.254761	0.270469	0.266251	0.238813	0.244058	0.249068	0.250821	0.249982	0.244105	0.249692
180	542	0.244964	0.247988	0.241654	0.246243	0.264224	0.264658	0.259907	0.247169	0.259833	0.259788	0.262222	0.245701	0.2416	0.239758	0.250583	0.242358	0.252477	0.263916	0.247731	0.244206	0.244942	0.223412	0.232169	0.243844	0.242078	0.204772	0.242186	0.24504	0.241176	0.248373	0.247146	0.240222	0.24927	0.244934	0.247056	0.25396	0.244015	0.254512	0.252054	0.26854	0.264032	0.235429	0.242295	0.246919	0.248765	0.249779	0.240697	0.245311
181	543	0.249774	0.251013	0.248297	0.249233	0.265951	0.268323	0.261675	0.249883	0.262313	0.264814	0.264925	0.247641	0.245147	0.243934	0.255396	0.246245	0.256283	0.2657	0.249873	0.248868	0.248364	0.229108	0.237417	0.246738	0.245032	0.216679	0.245566	0.248385	0.248381	0.249788	0.25087	0.241403	0.250574	0.249935	0.250257	0.255678	0.247263	0.255761	0.25404	0.272766	0.267597	0.241545	0.245485	0.250168	0.250656	0.2514	0.24492	0.248279
182	544	0.250743	0.249161	0.2503	0.247485	0.270004	0.274254	0.254364	0.242791	0.266238	0.25993	0.260203	0.242032	0.243614	0.235997	0.236897	0.240101	0.246517	0.255541	0.25897	0.250863	0.248652	0.242944	0.248028	0.227325	0.234951	0.249135	0.232849	0.25038	0.233416	0.240669	0.233941	0.225693	0.243684	0.230105	0.233192	0.25092	0.245729	0.242457	0.242116	0.257486	0.263449	0.224917	0.236637	0.250264	0.243296	0.248133	0.236822	0.249548
183	545	0.247089	0.243205	0.245449	0.245679	0.265644	0.270597	0.250223	0.240648	0.26222	0.253911	0.255309	0.239448	0.239314	0.236526	0.235671	0.241112	0.243594	0.252053	0.253234	0.246928	0.245688	0.240955	0.24501	0.22752	0.230424	0.246941	0.228841	0.247573	0.230121	0.239599	0.233792	0.227039	0.242183	0.226406	0.232025	0.244795	0.242999	0.242095	0.239126	0.253268	0.25868	0.224846	0.235342	0.246352	0.238129	0.245042	0.23456	0.243216
184	60	0.252922	0.246876	0.249725	0.251738	0.27139	0.272926	0.255806	0.243255	0.265291	0.257864	0.261633	0.241838	0.24315	0.239634	0.238915	0.246252	0.245929	0.253734	0.25636	0.251203	0.244608	0.243807	0.248147	0.22904	0.236895	0.250118	0.236343	0.24882	0.229611	0.24189	0.235868	0.226768	0.242496	0.228105	0.230525	0.250292	0.246194	0.240892	0.242374	0.254783	0.259565	0.225159	0.234423	0.25	0.244014	0.249028	0.238457	0.246109
185	67	0.214734	0.219404	0.240386	0.215384	0.255708	0.273562	0.255462	0.246006	0.269513	0.256678	0.258323	0.235565	0.204243	0.250748	0.253393	0.237147	0.255124	0.263787	0.237571	0.243247	0.241803	0.249418	0.254666	0.243245	0.244738	0.251914	0.247613	0.243281	0.249342	0.246965	0.251616	0.238975	0.247974	0.248588	0.249981	0.250992	0.242678	0.255379	0.249072	0.267287	0.2598	0.241471	0.246308	0.248788	0.248855	0.252611	0.237333	0.241612
186	72	0.250201	0.252272	0.249829	0.251226	0.270269	0.274497	0.26241	0.247125	0.266498	0.265813	0.265694	0.246687	0.246179	0.246738	0.25017	0.244921	0.24868	0.26238	0.256997	0.251896	0.250256	0.238222	0.241033	0.242716	0.243561	0.234801	0.244472	0.248426	0.244053	0.248674	0.25022	0.237401	0.251388	0.246305	0.247704	0.257023	0.247816	0.254876	0.253324	0.267942	0.268473	0.240461	0.243181	0.251989	0.251014	0.251183	0.243354	0.249072
187	73	0.2401	0.24528	0.244447	0.244597	0.263759	0.26813	0.256503	0.243017	0.263753	0.25768	0.259112	0.241094	0.238863	0.239016	0.245406	0.23796	0.244946	0.258502	0.248494	0.243643	0.24132	0.232171	0.239147	0.233049	0.236959	0.233521	0.232893	0.246998	0.235147	0.24313	0.242605	0.226445	0.245781	0.241507	0.240809	0.246666	0.238487	0.25	0.245242	0.26358	0.261471	0.232761	0.237979	0.245686	0.246281	0.246104	0.236618	0.243651
188	76	0.248647	0.248566	0.25097	0.250376	0.271532	0.275598	0.260411	0.244917	0.265474	0.259462	0.260527	0.244399	0.24404	0.246442	0.24448	0.24117	0.237873	0.25594	0.257308	0.250556	0.249146	0.242118	0.244291	0.233346	0.238195	0.248293	0.229798	0.248034	0.236048	0.242913	0.241854	0.234708	0.246577	0.237292	0.240373	0.254589	0.24075	0.244529	0.249672	0.261967	0.266833	0.235442	0.239356	0.250264	0.242499	0.249354	0.243659	0.249749
189	77	0.245707	0.250441	0.249591	0.245549	0.269527	0.2793	0.263088	0.2467	0.272248	0.264535	0.265031	0.247822	0.244164	0.252007	0.251843	0.226459	0.255859	0.265354	0.253562	0.248956	0.25023	0.251076	0.254438	0.245173	0.244148	0.253807	0.249367	0.2516	0.248168	0.24412	0.255949	0.242745	0.251315	0.250858	0.252279	0.256416	0.229312	0.257431	0.254825	0.270828	0.269848	0.244773	0.247378	0.250965	0.252081	0.25328	0.246053	0.251948
190	8	0.249574	0.247454	0.250432	0.247898	0.269807	0.275339	0.257903	0.233367	0.267952	0.260098	0.261856	0.242065	0.245037	0.244675	0.243945	0.241647	0.248665	0.250565	0.256021	0.250868	0.246043	0.245006	0.248605	0.233801	0.225955	0.248326	0.239714	0.248159	0.233771	0.246288	0.242197	0.235141	0.233995	0.237459	0.237253	0.251851	0.24609	0.245312	0.25	0.261977	0.264653	0.230636	0.234069	0.247627	0.243639	0.24937	0.241371	0.249241
191	80	0.242003	0.246479	0.246303	0.241592	0.266492	0.280152	0.26279	0.25124	0.27487	0.26253	0.26575	0.248389	0.237651	0.255099	0.253773	0.212803	0.256875	0.267729	0.24588	0.245427	0.245766	0.25415	0.258813	0.247415	0.249008	0.255599	0.253041	0.250508	0.252136	0.245389	0.255791	0.251486	0.249288	0.254603	0.253617	0.256531	0.208943	0.262354	0.255411	0.272991	0.268657	0.245953	0.248081	0.253694	0.251429	0.254948	0.246337	0.247815
192	85	0.270804	0.264675	0.271278	0.269297	0.288351	0.291622	0.275713	0.258094	0.28311	0.275975	0.27872	0.25947	0.263169	0.260423	0.257226	0.260485	0.261582	0.270102	0.280836	0.271214	0.265796	0.26319	0.26604	0.249225	0.252297	0.268197	0.252644	0.266869	0.251195	0.262891	0.253966	0.252494	0.263192	0.248532	0.251606	0.268767	0.261772	0.257575	0.260374	0.271689	0.280883	0.248492	0.257753	0.266924	0.2582	0.266199	0.258995	0.268669
193	89	0.253264	0.257678	0.228306	0.252927	0.246354	0.271606	0.250125	0.261493	0.272295	0.252814	0.255603	0.256561	0.2472	0.263716	0.265338	0.256779	0.268838	0.275584	0.218214	0.238436	0.238426	0.263084	0.267862	0.253921	0.257705	0.265362	0.257881	0.244325	0.254711	0.264707	0.262749	0.248897	0.26301	0.261331	0.261345	0.245513	0.258558	0.26121	0.247366	0.271979	0.255284	0.254778	0.25889	0.250254	0.2637	0.260452	0.232434	0.232255
194	90	0.231918	0.239664	0.252711	0.234636	0.270711	0.280379	0.266642	0.25727	0.276167	0.26894	0.271124	0.246834	0.228778	0.259029	0.261583	0.249786	0.263969	0.273375	0.253179	0.254474	0.255921	0.252661	0.255375	0.254176	0.253095	0.245483	0.24819	0.255512	0.255959	0.254472	0.260429	0.247952	0.257357	0.258298	0.260154	0.261333	0.252599	0.26483	0.259502	0.278451	0.272782	0.250636	0.255355	0.258792	0.25841	0.259887	0.250079	0.252175
195	93	0.27221	0.274242	0.253122	0.270822	0.246999	0.276354	0.258412	0.279281	0.280678	0.258132	0.259804	0.277301	0.266069	0.279062	0.283359	0.273537	0.285474	0.294005	0.243639	0.262505	0.259431	0.277409	0.281549	0.275022	0.275438	0.275967	0.278282	0.257424	0.276384	0.28147	0.27965	0.267246	0.280053	0.278975	0.279925	0.256735	0.278319	0.282018	0.259331	0.283388	0.261007	0.271605	0.276648	0.270753	0.280684	0.279051	0.259111	0.256992
196	N10	0.254112	0.251774	0.253714	0.254475	0.273184	0.278584	0.261918	0.249159	0.269876	0.264658	0.268017	0.247564	0.246835	0.24925	0.248145	0.247861	0.249459	0.262194	0.260641	0.254339	0.250558	0.244904	0.249023	0.24219	0.242606	0.245934	0.246825	0.251005	0.244193	0.249808	0.247586	0.241239	0.248827	0.247489	0.246918	0.259635	0.247612	0.252246	0.255265	0.268929	0.269642	0.236273	0.248351	0.251356	0.249835	0.2508	0.244713	0.255361
197	N8	0.256967	0.25557	0.259086	0.255166	0.278375	0.286338	0.268405	0.255265	0.276726	0.270085	0.272777	0.249913	0.251481	0.25568	0.253439	0.252241	0.259591	0.268255	0.264812	0.261155	0.260354	0.258532	0.261983	0.248723	0.249694	0.263107	0.252809	0.26321	0.250498	0.254976	0.253411	0.247211	0.256211	0.250358	0.249809	0.264019	0.255483	0.259853	0.260407	0.274062	0.275672	0.243872	0.25063	0.257957	0.258298	0.260186	0.252911	0.259453
198	N9	0.25116	0.247179	0.250424	0.249968	0.268811	0.274112	0.259632	0.244899	0.266715	0.258789	0.261818	0.24426	0.24423	0.241462	0.242864	0.243401	0.248815	0.257062	0.257229	0.249838	0.246777	0.244341	0.249555	0.233089	0.23481	0.247475	0.240682	0.25232	0.237561	0.244384	0.243873	0.235309	0.246	0.238279	0.240361	0.252779	0.247473	0.248907	0.246682	0.263193	0.265292	0.232187	0.238636	0.249031	0.24698	0.248321	0.241526	0.249112
[truncated: 150 more columns]
