# Supplementary material for: Development of core-collections for Guizhou tea genetic resources and GWAS of leaf size using SNP developed by genotyping-by-sequencing
Source: PeerJ. 2020 Mar 13;8:e8572. doi: 10.7717/peerj.8572 (PMC7075365; doi:10.7717/peerj.8572)
Supplement: Table S5 [file peerj-08-8572-s011.xlsx]

## Sheet: Sheet1
	Table S5 Identity-by-state (IBS)-based genetic distance matrix for 148 accessions using 30282 polymorphic SNPs.
Unit		1	2	3	4	5	6	7	8	9	10	11	12	13	14	15	16	17	18	19	20	21	22	23	24	25	26	27	28	29	30	31	32	33	34	35	36	37	38	39	40	41	42	43	44	45	46	47	48
	DNA ID
1	102
2	107	0.227321
3	117	0.250082	0.269326
4	119	0.224421	0.245264	0.256009
5	120	0.254158	0.267901	0.276936	0.255374
6	126	0.242563	0.22799	0.272679	0.255598	0.267708
7	127	0.223056	0.190048	0.265824	0.243529	0.263912	0.222707
8	130	0.251434	0.254128	0.272614	0.261281	0.268172	0.246232	0.247422
9	131	0.259298	0.258577	0.279844	0.264484	0.271821	0.244244	0.251512	0.2211
10	138	0.236905	0.232476	0.271492	0.252951	0.267216	0.241588	0.227244	0.246478	0.245345
11	15	0.268396	0.267453	0.291926	0.274928	0.283955	0.260895	0.262861	0.260939	0.260194	0.261228
12	152	0.160584	0.216354	0.241017	0.212238	0.251729	0.244618	0.216802	0.255721	0.266584	0.23817	0.277429
13	161	0.202382	0.233034	0.25764	0.234627	0.262122	0.24503	0.228829	0.251988	0.255831	0.239285	0.267397	0.181807
14	172	0.248628	0.248128	0.271128	0.260123	0.264044	0.247	0.244952	0.24419	0.25	0.244861	0.263342	0.256337	0.248075
15	173	0.25459	0.254312	0.275927	0.267574	0.271449	0.251789	0.246778	0.248801	0.254246	0.251119	0.265616	0.260284	0.252129	0.238848
16	177	0.24876	0.245834	0.271719	0.255304	0.267744	0.235368	0.237622	0.2395	0.232535	0.239999	0.251509	0.253401	0.243128	0.239779	0.242581
17	18	0.246974	0.241864	0.271719	0.25414	0.264938	0.240152	0.236679	0.242393	0.239973	0.236759	0.243561	0.253156	0.2469	0.241136	0.245645	0.228317
18	186	0.249544	0.248952	0.274149	0.25866	0.265774	0.242839	0.24147	0.241003	0.244642	0.243304	0.254798	0.258157	0.24629	0.24037	0.217056	0.224399	0.233307
19	190	0.208587	0.237816	0.256105	0.231556	0.245107	0.245997	0.232357	0.251536	0.25409	0.242687	0.267491	0.19611	0.221572	0.250949	0.252821	0.247128	0.247766	0.249925
20	192	0.250993	0.246897	0.272615	0.25472	0.26627	0.238383	0.243461	0.238355	0.23687	0.238017	0.251449	0.255777	0.246976	0.243538	0.245315	0.221233	0.234407	0.23048	0.24946
21	194	0.249736	0.247278	0.278862	0.259556	0.269761	0.243796	0.242673	0.247649	0.249242	0.236453	0.260448	0.255483	0.246505	0.245348	0.252874	0.237852	0.242008	0.243736	0.250201	0.242924
22	195	0.254059	0.251843	0.276207	0.257871	0.266221	0.244303	0.249346	0.245845	0.244414	0.248447	0.256488	0.260557	0.25154	0.246053	0.249441	0.23214	0.238261	0.239215	0.250215	0.233714	0.247475
23	199	0.246656	0.238712	0.267055	0.247331	0.263356	0.234705	0.234676	0.237979	0.235447	0.235224	0.251196	0.242515	0.237174	0.234131	0.239349	0.227147	0.230934	0.223834	0.248021	0.227496	0.240724	0.231395
24	20	0.250158	0.245609	0.275326	0.258478	0.272143	0.244507	0.241147	0.250443	0.248563	0.241602	0.254265	0.253647	0.248443	0.249487	0.253173	0.23943	0.236114	0.244122	0.251717	0.243559	0.249682	0.250994	0.233217
25	200	0.25478	0.254079	0.277372	0.257071	0.265951	0.242137	0.248089	0.240501	0.239957	0.246555	0.252384	0.261385	0.250919	0.244747	0.247082	0.229293	0.235705	0.234594	0.250754	0.231236	0.244403	0.23044	0.220168	0.243485
26	201	0.254979	0.252278	0.276098	0.259279	0.265794	0.243822	0.249071	0.241139	0.24211	0.246812	0.257592	0.262232	0.251001	0.245263	0.250128	0.229636	0.234763	0.23429	0.252576	0.235501	0.245488	0.236231	0.219857	0.24796	0.22784
27	203	0.214567	0.242493	0.252908	0.228398	0.256555	0.250372	0.236856	0.256814	0.257033	0.247062	0.268919	0.205045	0.226833	0.257362	0.261637	0.247353	0.249295	0.247615	0.226474	0.246204	0.256535	0.251505	0.235731	0.256235	0.250123	0.250088
28	205	0.239585	0.232077	0.273022	0.256803	0.272784	0.242634	0.231451	0.249022	0.250252	0.200886	0.261439	0.238397	0.235319	0.244863	0.251801	0.237654	0.240266	0.240755	0.247264	0.244332	0.240899	0.249355	0.237696	0.241961	0.249105	0.24443	0.245953
29	209	0.227933	0.241648	0.254366	0.234084	0.257588	0.247415	0.239755	0.255765	0.251411	0.246385	0.26461	0.221376	0.234408	0.25069	0.25662	0.242256	0.245969	0.246755	0.227866	0.245336	0.251846	0.24457	0.236869	0.250013	0.241689	0.24397	0.223208	0.247372
30	210	0.261973	0.264153	0.279381	0.262828	0.279928	0.263839	0.258854	0.265456	0.264555	0.265607	0.276607	0.260573	0.259281	0.266059	0.269346	0.253635	0.258393	0.259901	0.259779	0.258302	0.265326	0.25911	0.24896	0.265481	0.254256	0.255429	0.259629	0.269392	0.223383
31	214	0.229531	0.253003	0.259727	0.224919	0.262426	0.260028	0.248201	0.266584	0.271236	0.261467	0.281604	0.216673	0.237567	0.266512	0.272212	0.260484	0.259685	0.263929	0.236173	0.262235	0.268623	0.266037	0.254607	0.266882	0.26468	0.262214	0.230431	0.265982	0.234413	0.266834
32	217	0.243194	0.2411	0.270716	0.251651	0.260864	0.233506	0.23504	0.234641	0.23597	0.234305	0.249457	0.252119	0.244312	0.23631	0.240502	0.229089	0.228069	0.228378	0.243991	0.223303	0.236619	0.234347	0.230988	0.237556	0.233238	0.228582	0.249129	0.237436	0.241947	0.254307	0.25924
33	22	0.249557	0.242782	0.271652	0.256725	0.26592	0.24236	0.243137	0.242986	0.243865	0.240221	0.247413	0.250704	0.247478	0.245556	0.24635	0.235257	0.233557	0.237105	0.244972	0.234206	0.244996	0.239818	0.232472	0.229909	0.237283	0.239638	0.253667	0.238204	0.248426	0.258489	0.262796	0.229316
34	227	0.220815	0.244377	0.267158	0.248162	0.266532	0.248531	0.237414	0.254492	0.253916	0.240944	0.266236	0.218813	0.233371	0.249594	0.254272	0.246338	0.243269	0.248149	0.237718	0.250258	0.253366	0.252095	0.239068	0.249489	0.251399	0.253158	0.24233	0.244107	0.244374	0.267394	0.253222	0.241234	0.247125
35	233	0.251007	0.246544	0.278386	0.259683	0.269	0.24616	0.244857	0.250971	0.250619	0.245907	0.261115	0.256904	0.249288	0.24708	0.253835	0.237696	0.242814	0.243059	0.252504	0.243867	0.246322	0.244421	0.236764	0.246845	0.242799	0.241768	0.256121	0.244985	0.249924	0.26486	0.268481	0.236139	0.245855	0.251742
36	234	0.239619	0.249431	0.274812	0.259229	0.270402	0.247504	0.242755	0.25473	0.25353	0.247589	0.263556	0.244905	0.24743	0.250727	0.253477	0.240638	0.2426	0.243996	0.246969	0.245037	0.249773	0.251338	0.238962	0.252816	0.247908	0.249924	0.251224	0.248163	0.252705	0.270246	0.26406	0.238842	0.247463	0.230781	0.2518
37	235	0.201342	0.233668	0.257284	0.233208	0.255565	0.235531	0.226304	0.246012	0.246139	0.23449	0.259228	0.196497	0.217706	0.243355	0.250853	0.234452	0.23832	0.234869	0.224263	0.239497	0.242225	0.245065	0.226366	0.243093	0.242296	0.243897	0.226441	0.236858	0.229495	0.255749	0.240728	0.233671	0.237773	0.201133	0.242961	0.207667
38	237	0.190561	0.230612	0.254091	0.228488	0.256951	0.243404	0.227638	0.248316	0.255634	0.238255	0.26803	0.177413	0.209503	0.250746	0.255221	0.243991	0.247222	0.248642	0.218301	0.248753	0.247844	0.252666	0.232877	0.249747	0.247816	0.253006	0.225424	0.242668	0.2297	0.259898	0.233678	0.240802	0.247711	0.232604	0.241375	0.243038	0.206958
39	239	0.247805	0.245681	0.273003	0.252858	0.265357	0.239063	0.240877	0.238169	0.237135	0.240525	0.254339	0.254638	0.243833	0.239204	0.247127	0.223363	0.235759	0.230342	0.250771	0.227744	0.240465	0.229003	0.223082	0.24162	0.225379	0.229606	0.24846	0.241791	0.243876	0.254939	0.261665	0.222523	0.239566	0.246938	0.225845	0.243863	0.23663	0.233912
40	24	0.218994	0.24595	0.260192	0.236783	0.259985	0.251995	0.239633	0.253973	0.258876	0.2515	0.271051	0.209527	0.230965	0.256284	0.259461	0.246271	0.25212	0.250641	0.223064	0.249897	0.257198	0.252463	0.240291	0.256459	0.251037	0.252906	0.23307	0.252909	0.239054	0.263065	0.242297	0.246618	0.253758	0.24671	0.255185	0.253182	0.228976	0.224392	0.2493
41	241	0.21278	0.164921	0.26204	0.2384	0.265376	0.222941	0.169609	0.251574	0.258331	0.221552	0.266646	0.199935	0.223005	0.246404	0.250583	0.249464	0.243945	0.249517	0.225617	0.248493	0.242773	0.252176	0.238811	0.239754	0.256512	0.254529	0.234671	0.223531	0.241252	0.265419	0.243378	0.244685	0.244501	0.236917	0.244976	0.245376	0.223319	0.221007	0.250334	0.236155
42	244	0.231956	0.20426	0.270196	0.243813	0.268388	0.226227	0.203446	0.247568	0.248131	0.236398	0.259314	0.228128	0.233778	0.242031	0.248699	0.235352	0.239135	0.236468	0.240597	0.238952	0.241973	0.242057	0.23344	0.239888	0.241627	0.241245	0.240921	0.232985	0.23742	0.257898	0.252659	0.233787	0.242265	0.240028	0.229622	0.245229	0.229296	0.224489	0.22414	0.243051	0.17808
43	245	0.193778	0.225728	0.253355	0.230164	0.258176	0.240619	0.223672	0.251446	0.259593	0.234716	0.267827	0.174664	0.205512	0.2492	0.255328	0.244383	0.244933	0.24794	0.218381	0.252039	0.249738	0.254885	0.243391	0.243417	0.252926	0.255109	0.22355	0.234521	0.232069	0.261645	0.235645	0.241276	0.246289	0.228316	0.245667	0.244174	0.209844	0.194015	0.245588	0.22838	0.209585	0.226577
44	25	0.24132	0.260373	0.272459	0.253354	0.272811	0.265464	0.257167	0.267058	0.271729	0.264033	0.282112	0.232698	0.247164	0.263417	0.267302	0.262304	0.264083	0.267596	0.243459	0.264224	0.270516	0.269431	0.256062	0.26939	0.266279	0.267721	0.248647	0.264999	0.254634	0.27729	0.258755	0.257797	0.266258	0.258457	0.269579	0.266708	0.246008	0.245163	0.261887	0.240402	0.253761	0.259287	0.245725
45	251	0.19513	0.226647	0.251108	0.228068	0.254323	0.23953	0.223491	0.243984	0.246674	0.23206	0.261157	0.185859	0.210128	0.242247	0.247212	0.234318	0.234138	0.240741	0.215116	0.242848	0.244705	0.245704	0.228897	0.242261	0.243069	0.243145	0.224614	0.235385	0.227424	0.256179	0.234119	0.230611	0.238099	0.226815	0.245577	0.237328	0.212029	0.197559	0.235914	0.226062	0.2181	0.228797	0.190863	0.244228
46	263	0.250329	0.252153	0.272867	0.257092	0.267989	0.240514	0.243227	0.241339	0.238426	0.238731	0.25391	0.259536	0.248428	0.243244	0.246452	0.22005	0.234727	0.233311	0.249725	0.228029	0.244026	0.236394	0.226514	0.243965	0.23198	0.23042	0.250327	0.243637	0.248084	0.256894	0.262138	0.227657	0.236443	0.246025	0.240604	0.248164	0.239246	0.250499	0.226283	0.251984	0.248693	0.241274	0.250071	0.263763	0.238995
47	267	0.251567	0.254055	0.276893	0.260569	0.269909	0.246608	0.245846	0.246821	0.245571	0.245236	0.259519	0.254366	0.248425	0.250129	0.253694	0.238409	0.240225	0.241027	0.248965	0.239812	0.249285	0.245291	0.238635	0.246854	0.242371	0.241415	0.253295	0.24525	0.248629	0.264105	0.264704	0.233092	0.243362	0.252183	0.249586	0.249625	0.243527	0.25052	0.236892	0.254008	0.253024	0.246928	0.25124	0.26858	0.24181	0.238557
48	268	0.243301	0.227146	0.275984	0.260499	0.27148	0.241433	0.212838	0.249801	0.250691	0.243798	0.265507	0.245595	0.249907	0.251942	0.255868	0.242752	0.241704	0.248551	0.248322	0.248962	0.249956	0.248532	0.240863	0.248125	0.249206	0.246505	0.251872	0.243114	0.250527	0.268016	0.264499	0.242047	0.251308	0.251589	0.250693	0.253485	0.241338	0.244532	0.243921	0.253847	0.220931	0.234468	0.246757	0.267512	0.242433	0.24774	0.252219
49	273	0.235233	0.228542	0.267997	0.254647	0.265012	0.236865	0.22117	0.242126	0.249745	0.235884	0.262697	0.236458	0.239962	0.234811	0.24323	0.237834	0.239075	0.241401	0.240115	0.242415	0.244683	0.244275	0.230904	0.242021	0.247422	0.244654	0.245835	0.237056	0.246768	0.263671	0.258764	0.236123	0.24361	0.245672	0.247714	0.249027	0.233914	0.23876	0.240533	0.24665	0.219042	0.227062	0.236439	0.256138	0.23362	0.244115	0.249127	0.234223
50	280	0.255439	0.249781	0.277444	0.256763	0.266243	0.243623	0.246993	0.242675	0.24335	0.244474	0.256726	0.260761	0.250835	0.24498	0.250082	0.234938	0.239654	0.23672	0.246768	0.237328	0.247632	0.24161	0.229673	0.248391	0.237224	0.233092	0.255383	0.249447	0.247633	0.260964	0.264335	0.231024	0.238083	0.250415	0.244346	0.248381	0.241615	0.250898	0.234331	0.253642	0.251854	0.241154	0.25	0.267206	0.244258	0.236452	0.243509	0.251327
51	281	0.253254	0.250124	0.27619	0.25944	0.268397	0.241102	0.244709	0.244853	0.242114	0.242216	0.255411	0.262445	0.249569	0.245084	0.249909	0.232473	0.235349	0.233684	0.250506	0.234667	0.244356	0.240324	0.229141	0.24439	0.233151	0.236986	0.253086	0.245725	0.246207	0.259103	0.264826	0.229721	0.239674	0.250178	0.244809	0.24841	0.244058	0.249951	0.232836	0.256008	0.251849	0.241838	0.252374	0.267385	0.239819	0.231923	0.241902	0.248311
52	282	0.211807	0.239174	0.262103	0.239627	0.26258	0.244658	0.236349	0.253184	0.256484	0.245894	0.269078	0.199987	0.224051	0.252673	0.257045	0.244421	0.249634	0.252213	0.229215	0.247789	0.252331	0.253613	0.244822	0.254954	0.251054	0.252124	0.235012	0.247617	0.236288	0.2622	0.244077	0.243675	0.247382	0.23854	0.253147	0.250554	0.224052	0.217581	0.247698	0.236119	0.231787	0.239893	0.220636	0.25576	0.219112	0.248375	0.248502	0.248301
53	284	0.242971	0.220484	0.274801	0.257172	0.270365	0.234843	0.216544	0.250222	0.249414	0.243374	0.265238	0.244019	0.24453	0.249242	0.255045	0.23955	0.243638	0.248966	0.247426	0.24501	0.24977	0.249497	0.239421	0.249295	0.247345	0.245741	0.249189	0.242457	0.250932	0.265783	0.261274	0.240946	0.245412	0.254866	0.250167	0.251354	0.241036	0.243921	0.245653	0.253593	0.211555	0.227764	0.241551	0.264872	0.238903	0.243942	0.252205	0.235962
54	294	0.255353	0.253076	0.275727	0.259762	0.266516	0.241347	0.245838	0.244719	0.242386	0.245783	0.254916	0.261411	0.251064	0.244565	0.246649	0.233699	0.236587	0.2317	0.251558	0.233711	0.244482	0.239307	0.235629	0.243808	0.233742	0.23631	0.253472	0.248432	0.246657	0.258428	0.264544	0.231706	0.238758	0.251409	0.24312	0.249896	0.242758	0.250629	0.230685	0.250431	0.251454	0.240813	0.252475	0.268648	0.244139	0.235586	0.239967	0.249229
55	295	0.254862	0.251358	0.280141	0.262162	0.272233	0.246989	0.246239	0.245194	0.245292	0.238513	0.258856	0.260304	0.251854	0.249813	0.252242	0.239466	0.239215	0.24294	0.25191	0.245427	0.246255	0.249681	0.237739	0.247478	0.24333	0.245904	0.259331	0.242684	0.25392	0.265189	0.269599	0.236281	0.243398	0.250044	0.249068	0.251693	0.244011	0.253497	0.241247	0.256635	0.247764	0.246283	0.252613	0.272342	0.244588	0.243706	0.246749	0.250344
56	296	0.253466	0.248631	0.278483	0.262219	0.270302	0.250532	0.242868	0.249761	0.252269	0.238554	0.263827	0.255615	0.246908	0.247693	0.250973	0.24385	0.242385	0.242638	0.249551	0.249056	0.247324	0.249521	0.241441	0.248061	0.248409	0.24862	0.258226	0.241016	0.254601	0.269437	0.269986	0.242257	0.244654	0.25366	0.252064	0.252336	0.245492	0.253933	0.246201	0.258289	0.245823	0.244399	0.251495	0.272209	0.244459	0.246163	0.249991	0.250791
57	297	0.245604	0.243249	0.267738	0.254954	0.264051	0.236264	0.240037	0.240779	0.241474	0.235484	0.250912	0.25251	0.243024	0.236279	0.243364	0.225559	0.231147	0.224772	0.248017	0.230267	0.239575	0.236228	0.225146	0.238181	0.232673	0.233791	0.24556	0.238728	0.242971	0.257448	0.260327	0.224675	0.234014	0.243958	0.242042	0.242584	0.235185	0.245306	0.233444	0.24842	0.247168	0.236729	0.244386	0.261826	0.237763	0.226825	0.237004	0.244335
58	302	0.246904	0.242664	0.272743	0.255012	0.263715	0.241785	0.240422	0.242241	0.244636	0.238196	0.255313	0.253622	0.247053	0.239772	0.244887	0.23093	0.234014	0.229478	0.246181	0.235712	0.239934	0.238957	0.233685	0.245134	0.239501	0.238162	0.249149	0.238022	0.246476	0.260982	0.263539	0.228156	0.235608	0.245127	0.242584	0.244094	0.238606	0.247913	0.232843	0.251429	0.243665	0.239726	0.247424	0.265009	0.231575	0.2342	0.242412	0.246112
59	303	0.243744	0.244881	0.272177	0.255868	0.265753	0.239648	0.239171	0.241111	0.24269	0.234871	0.253628	0.251149	0.246414	0.238018	0.24308	0.230798	0.234465	0.228236	0.247809	0.231108	0.238912	0.240384	0.22821	0.242275	0.237148	0.235982	0.249163	0.237494	0.244513	0.259029	0.262071	0.228259	0.234374	0.244485	0.241853	0.242793	0.236422	0.245493	0.233739	0.249989	0.241825	0.236425	0.249027	0.262933	0.234386	0.231424	0.241276	0.245077
60	304	0.231632	0.203759	0.267462	0.247856	0.265963	0.223115	0.20397	0.24526	0.247431	0.230621	0.259213	0.227969	0.234973	0.244506	0.248237	0.238586	0.238338	0.240504	0.238366	0.236804	0.242197	0.244377	0.232649	0.241358	0.246541	0.243919	0.241845	0.233961	0.245598	0.263691	0.251901	0.235249	0.242831	0.238931	0.243383	0.245761	0.230264	0.234768	0.237461	0.246117	0.186418	0.214323	0.227113	0.258067	0.228442	0.242745	0.246005	0.231579
61	309	0.200081	0.233148	0.256559	0.229662	0.255177	0.241356	0.228323	0.245489	0.249867	0.23537	0.264451	0.189703	0.217457	0.249193	0.255461	0.241643	0.240701	0.24213	0.223047	0.241005	0.24609	0.247615	0.233541	0.247856	0.245458	0.248703	0.228417	0.243082	0.230627	0.256897	0.23787	0.238425	0.244732	0.231496	0.248105	0.24375	0.219177	0.210392	0.241079	0.228277	0.225081	0.232854	0.211727	0.248123	0.208404	0.24448	0.245951	0.243964
62	313	0.255403	0.256961	0.27987	0.266297	0.270542	0.247307	0.248998	0.249801	0.250997	0.250565	0.260965	0.263304	0.256482	0.24694	0.25	0.236274	0.244382	0.239898	0.254634	0.238483	0.245165	0.245715	0.241592	0.248299	0.245617	0.244606	0.259481	0.247661	0.254175	0.266511	0.273161	0.237368	0.244278	0.253491	0.249005	0.251244	0.248702	0.255447	0.245538	0.259717	0.254545	0.247342	0.256273	0.271844	0.246524	0.241586	0.249157	0.249607
63	318	0.217724	0.240473	0.259897	0.244605	0.258198	0.24639	0.23595	0.246181	0.252079	0.240859	0.265291	0.215513	0.227767	0.23809	0.244403	0.244392	0.242196	0.244939	0.233822	0.245142	0.249111	0.248441	0.240392	0.24954	0.246576	0.248412	0.237154	0.244149	0.24166	0.264581	0.250545	0.238113	0.246643	0.236133	0.250928	0.247993	0.226594	0.226904	0.244421	0.242271	0.232644	0.239559	0.223794	0.253475	0.222637	0.246012	0.247045	0.24912
64	319	0.2517	0.249148	0.276695	0.261281	0.267995	0.244837	0.241263	0.245069	0.245015	0.241021	0.257747	0.257754	0.248037	0.244356	0.246074	0.239163	0.236094	0.2347	0.249708	0.236661	0.242856	0.244819	0.235134	0.246917	0.241539	0.240435	0.254315	0.244766	0.251507	0.264133	0.265546	0.233547	0.239201	0.251572	0.248064	0.247915	0.244311	0.250251	0.23817	0.255126	0.249796	0.241416	0.250839	0.267131	0.240935	0.23958	0.245123	0.249161
65	323	0.244171	0.243565	0.27143	0.256536	0.264388	0.240601	0.235374	0.241063	0.241441	0.231639	0.25478	0.247249	0.238943	0.236089	0.241661	0.228273	0.233562	0.231906	0.241503	0.231498	0.239645	0.239053	0.232457	0.240689	0.237817	0.237818	0.247614	0.231012	0.243964	0.261539	0.259688	0.22897	0.234832	0.242234	0.242331	0.241377	0.235507	0.242188	0.23287	0.248659	0.237819	0.233307	0.240248	0.261505	0.231097	0.233259	0.237623	0.240506
66	326	0.248661	0.243811	0.273587	0.255903	0.266162	0.240939	0.23831	0.241501	0.245738	0.236689	0.254103	0.25253	0.242638	0.240367	0.241857	0.228025	0.233944	0.229265	0.246565	0.232094	0.240554	0.239246	0.227267	0.238998	0.238117	0.238164	0.247371	0.235435	0.246274	0.259344	0.262275	0.228112	0.234866	0.246619	0.243841	0.24585	0.23704	0.245989	0.232797	0.251206	0.244266	0.236988	0.244067	0.264676	0.234543	0.234845	0.240505	0.243428
67	327	0.254817	0.25608	0.283015	0.264841	0.273482	0.25039	0.25307	0.249696	0.247736	0.252259	0.261549	0.266524	0.253667	0.250852	0.250506	0.239006	0.240733	0.239794	0.255884	0.242042	0.247246	0.249141	0.241215	0.251424	0.247131	0.247357	0.259384	0.249662	0.256194	0.266942	0.272774	0.237191	0.244967	0.254527	0.250719	0.252576	0.248942	0.256107	0.242718	0.260817	0.256367	0.246683	0.258277	0.271291	0.247403	0.246325	0.250115	0.254809
68	329	0.238401	0.252466	0.273777	0.255235	0.269459	0.252266	0.247478	0.253837	0.253871	0.25107	0.266681	0.236717	0.240824	0.253576	0.256782	0.242959	0.248964	0.248426	0.2469	0.249718	0.255812	0.252325	0.237284	0.253182	0.249656	0.250666	0.249268	0.253136	0.247442	0.263346	0.258872	0.243348	0.250213	0.248348	0.254896	0.254204	0.236833	0.24096	0.243941	0.24569	0.248079	0.245429	0.241507	0.265432	0.234897	0.249126	0.251486	0.25534
69	331	0.260047	0.25512	0.282732	0.268535	0.274335	0.249437	0.250818	0.251867	0.251618	0.24998	0.261106	0.263899	0.257649	0.252933	0.255942	0.243942	0.242737	0.24642	0.256445	0.243995	0.252634	0.248308	0.239658	0.248341	0.24649	0.246634	0.262852	0.256063	0.255284	0.267772	0.27037	0.188866	0.244769	0.256835	0.251884	0.256456	0.24892	0.256871	0.240524	0.260751	0.255534	0.24694	0.257867	0.272845	0.247483	0.243342	0.250866	0.255866
70	340	0.164059	0.204368	0.237179	0.201461	0.236455	0.232027	0.201889	0.242834	0.250229	0.226981	0.263008	0.13178	0.183578	0.237868	0.246779	0.238543	0.238165	0.243649	0.179674	0.242887	0.241124	0.248033	0.240244	0.238662	0.246873	0.246018	0.198551	0.227307	0.206847	0.250092	0.206686	0.2372	0.236934	0.211357	0.242041	0.234318	0.194302	0.175555	0.244404	0.203134	0.189649	0.219986	0.173041	0.223883	0.177662	0.245241	0.240281	0.231054
71	361	0.25873	0.259027	0.280487	0.264655	0.272571	0.248954	0.253176	0.247307	0.244993	0.249346	0.260481	0.264344	0.256074	0.253595	0.253765	0.237742	0.243985	0.23963	0.254704	0.240711	0.247747	0.245259	0.242417	0.250659	0.239209	0.241269	0.259536	0.253714	0.25541	0.263984	0.27269	0.237409	0.243902	0.255899	0.24695	0.253526	0.247463	0.255769	0.239356	0.256731	0.25727	0.249709	0.259069	0.270236	0.250895	0.240577	0.24945	0.256458
72	364	0.257175	0.255225	0.279841	0.263193	0.270492	0.248476	0.245599	0.244431	0.240647	0.244532	0.26216	0.262975	0.252859	0.246526	0.247634	0.240784	0.239907	0.2403	0.254584	0.243409	0.247772	0.24386	0.235546	0.249853	0.244307	0.243136	0.258248	0.247707	0.253199	0.26612	0.269975	0.234247	0.242106	0.253436	0.250439	0.250879	0.245966	0.255473	0.240093	0.256606	0.252755	0.247328	0.256592	0.2695	0.244988	0.241012	0.248482	0.250714
73	367	0.178519	0.224823	0.246532	0.218494	0.251869	0.239984	0.219481	0.250439	0.255869	0.236644	0.269578	0.146116	0.193381	0.24895	0.254199	0.246654	0.246236	0.251834	0.207021	0.251122	0.251082	0.253503	0.240247	0.247346	0.253833	0.253288	0.21331	0.238265	0.226643	0.258641	0.223812	0.243536	0.245837	0.222032	0.251479	0.244152	0.200802	0.193316	0.247886	0.216408	0.206231	0.229279	0.188199	0.235826	0.187488	0.25037	0.249463	0.246757
74	370	0.25676	0.252776	0.280856	0.26515	0.272635	0.248663	0.24698	0.247336	0.247012	0.246951	0.26102	0.260934	0.25418	0.247018	0.251211	0.239573	0.241942	0.243303	0.253928	0.244594	0.24826	0.245551	0.240402	0.249878	0.243674	0.24453	0.257222	0.247275	0.253251	0.26671	0.270519	0.236531	0.245117	0.253459	0.248879	0.254592	0.248678	0.253862	0.239103	0.258759	0.250825	0.244015	0.254692	0.271345	0.245992	0.242549	0.249929	0.254652
75	372	0.244988	0.239236	0.282187	0.264126	0.278657	0.254548	0.234199	0.262896	0.268309	0.238181	0.274508	0.242862	0.247632	0.260103	0.264062	0.257036	0.253709	0.255695	0.252322	0.259706	0.255389	0.264276	0.254463	0.253084	0.26578	0.265395	0.258035	0.240024	0.25898	0.280664	0.269393	0.252085	0.255153	0.253582	0.255386	0.261344	0.246227	0.248842	0.258937	0.259984	0.224455	0.241757	0.238802	0.274323	0.246064	0.260949	0.264198	0.254321
76	374	0.248783	0.247633	0.277664	0.259523	0.271626	0.247484	0.240238	0.249788	0.250757	0.244791	0.263084	0.255164	0.247848	0.249493	0.253205	0.23848	0.240853	0.242364	0.251684	0.240789	0.247864	0.244696	0.234095	0.247539	0.242795	0.245511	0.252007	0.242263	0.250487	0.262848	0.265761	0.239708	0.239027	0.24985	0.245259	0.253629	0.241943	0.249531	0.239042	0.254881	0.241343	0.241123	0.247184	0.268241	0.239693	0.241808	0.247363	0.248246
77	375	0.254918	0.252094	0.277995	0.26185	0.270237	0.247615	0.247604	0.246141	0.246309	0.243879	0.259021	0.260506	0.250779	0.246282	0.250588	0.236393	0.241924	0.239822	0.251311	0.23651	0.246347	0.243911	0.236692	0.249328	0.239173	0.240689	0.254283	0.247232	0.247039	0.261792	0.265035	0.235385	0.24346	0.252443	0.246798	0.251761	0.246396	0.253022	0.233959	0.256479	0.251387	0.244012	0.25517	0.26795	0.245195	0.237252	0.248144	0.25006
78	376	0.259799	0.256623	0.281133	0.263606	0.271737	0.247132	0.249101	0.248377	0.246623	0.244785	0.262561	0.265705	0.254187	0.249663	0.25278	0.23454	0.242882	0.243576	0.2579	0.240457	0.248439	0.244463	0.238338	0.253159	0.239796	0.244167	0.257927	0.250209	0.249774	0.266026	0.269291	0.237113	0.245561	0.254421	0.248952	0.253024	0.247588	0.254862	0.237773	0.258973	0.255475	0.243964	0.256973	0.272793	0.247763	0.23762	0.251466	0.252508
79	382	0.251993	0.248572	0.276915	0.261077	0.27198	0.245998	0.24555	0.245862	0.244976	0.244652	0.258845	0.254971	0.247018	0.247418	0.250443	0.237263	0.240363	0.241223	0.25039	0.244659	0.246833	0.244214	0.240065	0.243158	0.242998	0.245153	0.255977	0.24057	0.252618	0.264956	0.268053	0.235807	0.241176	0.247544	0.247867	0.251872	0.245066	0.250507	0.240695	0.256728	0.249907	0.245801	0.251643	0.267658	0.241332	0.240624	0.244159	0.249591
80	383	0.250922	0.248852	0.279782	0.26414	0.276102	0.249322	0.243086	0.25221	0.250147	0.243777	0.264906	0.254897	0.249703	0.250906	0.255182	0.243145	0.243078	0.248595	0.251037	0.247903	0.249646	0.253633	0.242465	0.244049	0.249032	0.251568	0.256435	0.24393	0.255726	0.269687	0.26794	0.238864	0.245955	0.247606	0.251656	0.253497	0.242862	0.250493	0.247124	0.259354	0.242966	0.24517	0.24737	0.271755	0.24448	0.247032	0.251266	0.251695
81	385	0.244618	0.252345	0.268359	0.249101	0.265083	0.249341	0.243941	0.253523	0.251285	0.247289	0.265601	0.240923	0.244069	0.254216	0.255099	0.238692	0.243975	0.244343	0.243389	0.245033	0.253769	0.248664	0.23976	0.253047	0.24267	0.246656	0.247915	0.252868	0.241304	0.261812	0.251951	0.242426	0.248146	0.249471	0.25072	0.25456	0.240567	0.246038	0.241665	0.246865	0.246035	0.24589	0.24541	0.261447	0.236926	0.240703	0.250712	0.252075
82	390	0.157514	0.215234	0.236193	0.208405	0.243174	0.233663	0.207772	0.248819	0.25624	0.231822	0.265443	0.114738	0.176776	0.2453	0.250106	0.246767	0.240987	0.245233	0.181222	0.249503	0.247177	0.252825	0.233679	0.245702	0.251163	0.250312	0.200403	0.231463	0.217537	0.254191	0.209979	0.238822	0.242425	0.213505	0.246835	0.237061	0.187323	0.171629	0.246057	0.203898	0.194689	0.223636	0.17081	0.227243	0.173	0.246701	0.245778	0.239846
83	391	0.257323	0.256813	0.27906	0.263419	0.270741	0.24693	0.249412	0.248785	0.246075	0.245946	0.260177	0.263663	0.251854	0.248442	0.250943	0.235434	0.239886	0.239987	0.255274	0.240371	0.249325	0.245608	0.238506	0.247949	0.241569	0.241248	0.258762	0.250415	0.252558	0.26569	0.269351	0.234735	0.243705	0.255135	0.24645	0.252106	0.246565	0.256534	0.238312	0.257451	0.256483	0.246564	0.25665	0.271378	0.249	0.240556	0.24882	0.250009
84	393	0.247207	0.257701	0.271976	0.254778	0.270491	0.256483	0.251461	0.257378	0.258251	0.253572	0.271164	0.247542	0.249415	0.256778	0.261207	0.246613	0.253851	0.249307	0.25072	0.251455	0.25924	0.256626	0.245863	0.257953	0.248931	0.256165	0.247753	0.25612	0.247946	0.266588	0.259874	0.246042	0.255415	0.254606	0.257003	0.259562	0.245886	0.247597	0.245856	0.253725	0.253556	0.249812	0.250076	0.270195	0.244709	0.249034	0.256751	0.259855
85	395	0.26031	0.258587	0.281035	0.265546	0.271824	0.249162	0.250469	0.248458	0.244478	0.251719	0.260727	0.266515	0.254481	0.251336	0.252425	0.235169	0.24227	0.240334	0.256529	0.23837	0.249418	0.243273	0.231455	0.250571	0.238983	0.241842	0.255736	0.252392	0.251824	0.260336	0.269631	0.237349	0.244678	0.256326	0.248558	0.255266	0.246188	0.257729	0.237547	0.257783	0.258768	0.245149	0.260565	0.270479	0.248748	0.236214	0.248088	0.253965
86	398	0.228916	0.245473	0.258957	0.235872	0.263464	0.255419	0.246457	0.258918	0.262733	0.254818	0.274063	0.215846	0.233409	0.257646	0.263155	0.251068	0.252918	0.257797	0.233593	0.253416	0.261987	0.258806	0.251356	0.259468	0.256942	0.255667	0.231949	0.257185	0.238908	0.261476	0.24041	0.248139	0.255896	0.25035	0.258991	0.259513	0.23592	0.231766	0.253738	0.239227	0.239582	0.246649	0.232357	0.253109	0.230842	0.255289	0.256899	0.258056
87	399	0.261152	0.258192	0.279703	0.266304	0.272324	0.246478	0.254899	0.250228	0.247854	0.249637	0.260358	0.267021	0.25547	0.250947	0.254673	0.237587	0.24533	0.243922	0.257166	0.235662	0.250507	0.244882	0.235391	0.254638	0.237003	0.240299	0.25888	0.254844	0.250186	0.264831	0.269458	0.239944	0.247827	0.255539	0.251177	0.253077	0.249147	0.255909	0.237672	0.26034	0.258191	0.242221	0.259569	0.272281	0.249709	0.23901	0.250907	0.254816
88	400	0.254227	0.251844	0.285093	0.268901	0.279946	0.253739	0.245081	0.259116	0.257902	0.24517	0.268592	0.258067	0.253244	0.256491	0.259396	0.25113	0.251638	0.25375	0.256041	0.252073	0.257574	0.259078	0.242151	0.250163	0.255585	0.259879	0.258152	0.247199	0.258771	0.276218	0.272768	0.245822	0.253185	0.25294	0.254549	0.256756	0.247867	0.254866	0.253857	0.262841	0.240884	0.247744	0.252845	0.276092	0.24763	0.253555	0.245916	0.258427
89	404	0.239971	0.253413	0.267425	0.249187	0.268722	0.250963	0.248224	0.252933	0.253096	0.255135	0.268398	0.236813	0.242751	0.256513	0.259967	0.241852	0.251621	0.251417	0.241488	0.246363	0.257092	0.251721	0.243581	0.256186	0.248514	0.252334	0.24085	0.254804	0.240065	0.262917	0.249694	0.246325	0.254666	0.248337	0.255701	0.254282	0.234057	0.240713	0.247398	0.248667	0.247096	0.246502	0.245241	0.26041	0.235044	0.248826	0.253651	0.254988
90	406	0.226875	0.24965	0.258031	0.235468	0.263233	0.257138	0.246122	0.259259	0.263286	0.252955	0.274323	0.215271	0.234328	0.260673	0.267268	0.253013	0.255399	0.259491	0.233951	0.256602	0.263153	0.260349	0.244899	0.261913	0.257512	0.257214	0.228615	0.254179	0.23458	0.263513	0.239681	0.250877	0.257259	0.249523	0.261028	0.258767	0.233744	0.23195	0.25364	0.238921	0.239445	0.246033	0.231879	0.254786	0.228141	0.25772	0.258874	0.25817
91	419	0.240796	0.262827	0.272127	0.253888	0.276639	0.26732	0.258178	0.273167	0.276818	0.268143	0.287175	0.23327	0.251379	0.274749	0.277565	0.264896	0.268325	0.26905	0.247834	0.267204	0.275559	0.273755	0.26005	0.27318	0.270478	0.271769	0.244991	0.270942	0.248424	0.275415	0.25436	0.264508	0.27063	0.264086	0.274506	0.270943	0.24992	0.245618	0.268358	0.253976	0.253971	0.257384	0.249444	0.268383	0.244923	0.271752	0.272002	0.271752
92	42	0.264597	0.265831	0.282645	0.276204	0.27758	0.26086	0.258173	0.255683	0.260815	0.262596	0.273496	0.271244	0.262827	0.250633	0.253617	0.252064	0.256056	0.257324	0.264573	0.252221	0.261686	0.261252	0.248308	0.260789	0.255695	0.257432	0.268336	0.263171	0.263956	0.277597	0.28062	0.253755	0.25627	0.264844	0.263162	0.266578	0.258869	0.265064	0.254192	0.269585	0.262586	0.256598	0.264733	0.274705	0.257961	0.254757	0.261565	0.262774
93	420	0.249227	0.25453	0.273267	0.2536	0.268437	0.249919	0.253359	0.251284	0.251756	0.250438	0.262496	0.249935	0.248682	0.254874	0.257271	0.242518	0.247736	0.24775	0.246782	0.245043	0.253219	0.248772	0.242612	0.253302	0.244177	0.245349	0.246353	0.254542	0.242782	0.263472	0.256969	0.24248	0.249288	0.256552	0.25712	0.256098	0.242831	0.247036	0.247486	0.251616	0.254394	0.248256	0.251273	0.266952	0.243753	0.247813	0.252165	0.256271
94	427	0.254827	0.256881	0.275429	0.260332	0.270712	0.24785	0.251038	0.249067	0.24811	0.253427	0.264821	0.25952	0.252896	0.252089	0.255178	0.23862	0.247324	0.24266	0.252926	0.243433	0.254261	0.246443	0.234899	0.253332	0.243523	0.246187	0.255087	0.256244	0.253054	0.262708	0.264718	0.240751	0.247556	0.255234	0.252315	0.252105	0.244524	0.252549	0.241879	0.257607	0.256696	0.245997	0.255457	0.267603	0.247213	0.241653	0.251479	0.25276
95	428	0.253895	0.251521	0.27706	0.263589	0.26965	0.246675	0.246933	0.243719	0.245091	0.244616	0.259098	0.259437	0.249024	0.247862	0.250747	0.239084	0.240532	0.24001	0.25074	0.242195	0.249129	0.246143	0.233251	0.24481	0.242345	0.245013	0.25566	0.24801	0.252888	0.265548	0.267029	0.236985	0.242055	0.25225	0.249572	0.250611	0.244199	0.252469	0.239446	0.255513	0.252448	0.245093	0.253323	0.269165	0.246565	0.242681	0.244971	0.251491
96	432	0.21949	0.243594	0.249825	0.225997	0.255307	0.249336	0.239414	0.253903	0.260536	0.244721	0.272335	0.205601	0.229765	0.254216	0.260211	0.247215	0.248044	0.251772	0.225318	0.251307	0.256808	0.255011	0.243062	0.255917	0.250975	0.255367	0.219164	0.249654	0.223689	0.258157	0.231025	0.244284	0.249604	0.244847	0.254871	0.253623	0.227215	0.223561	0.250588	0.233005	0.234134	0.240371	0.225519	0.253431	0.224851	0.249051	0.256043	0.257105
97	433	0.217894	0.241159	0.25393	0.22348	0.254863	0.249107	0.238764	0.253684	0.2591	0.250682	0.271114	0.206696	0.229243	0.254591	0.258576	0.246517	0.250258	0.252452	0.222867	0.251225	0.255881	0.252327	0.239959	0.255534	0.251545	0.250901	0.219465	0.253424	0.229097	0.25766	0.228401	0.246378	0.248943	0.24755	0.257972	0.253642	0.226083	0.223812	0.247553	0.232817	0.233972	0.243464	0.226856	0.252422	0.223712	0.250312	0.253107	0.255079
98	435	0.192676	0.241134	0.232952	0.201163	0.248	0.247712	0.228841	0.257252	0.270177	0.24182	0.279522	0.169374	0.216723	0.257284	0.262017	0.251181	0.253176	0.262777	0.214836	0.259578	0.261512	0.2648	0.243964	0.256931	0.262882	0.263606	0.203216	0.240884	0.211512	0.256915	0.191088	0.243774	0.254514	0.236145	0.266234	0.254883	0.217201	0.204009	0.250106	0.218682	0.213475	0.231763	0.205005	0.241818	0.199219	0.258043	0.252398	0.258213
99	438	0.254939	0.255303	0.278507	0.261914	0.269254	0.246355	0.250576	0.24567	0.24541	0.249861	0.257693	0.266002	0.252739	0.248947	0.251561	0.231271	0.237286	0.238655	0.253065	0.23908	0.248228	0.241077	0.233932	0.249642	0.235903	0.238103	0.256803	0.25274	0.247613	0.259418	0.268165	0.234085	0.243804	0.256843	0.247421	0.25198	0.246671	0.254677	0.234495	0.25389	0.257857	0.243298	0.257531	0.268275	0.245361	0.236594	0.243915	0.251576
100	439	0.258313	0.257084	0.277516	0.264888	0.269645	0.249956	0.252694	0.247588	0.253249	0.252289	0.262694	0.263596	0.256487	0.240175	0.245056	0.243313	0.244784	0.244868	0.256773	0.244732	0.250556	0.246127	0.24232	0.250282	0.244773	0.248275	0.261653	0.255588	0.252697	0.266378	0.271473	0.24086	0.246373	0.255	0.25206	0.254604	0.247697	0.255749	0.239009	0.258082	0.257605	0.2473	0.257719	0.266043	0.247632	0.245262	0.250423	0.254909
101	441	0.248875	0.24459	0.268575	0.250439	0.262205	0.236618	0.241344	0.236126	0.234629	0.238573	0.251783	0.254603	0.244656	0.242107	0.244054	0.222597	0.230502	0.22735	0.246069	0.229317	0.241355	0.229696	0.220762	0.242519	0.227172	0.228362	0.242482	0.244065	0.238277	0.252948	0.258547	0.227684	0.231973	0.245171	0.238959	0.244789	0.235903	0.24229	0.222691	0.24644	0.246292	0.231131	0.245994	0.26273	0.236436	0.228312	0.236129	0.243453
102	445	0.241871	0.249955	0.271289	0.252934	0.268079	0.248077	0.243581	0.249861	0.248249	0.244544	0.260889	0.247382	0.248398	0.249463	0.250383	0.237897	0.242946	0.234228	0.250566	0.237796	0.247741	0.240837	0.238608	0.2495	0.24002	0.23997	0.247773	0.247496	0.241531	0.255332	0.258431	0.236999	0.245164	0.248973	0.248999	0.25209	0.239497	0.244265	0.230926	0.247345	0.249086	0.243598	0.243487	0.265671	0.239171	0.237344	0.248165	0.250287
103	446	0.260996	0.25438	0.280475	0.266283	0.273475	0.247586	0.251468	0.246931	0.245418	0.250819	0.260128	0.267526	0.255805	0.25163	0.25405	0.236543	0.242267	0.238915	0.257107	0.241274	0.249893	0.244427	0.23449	0.250874	0.238504	0.237582	0.257486	0.252572	0.252339	0.260929	0.269845	0.235946	0.245471	0.255032	0.247202	0.25504	0.249183	0.257161	0.232369	0.258696	0.257155	0.247125	0.258297	0.269206	0.24821	0.236269	0.249506	0.252514
104	449	0.258348	0.257074	0.279238	0.264594	0.271988	0.251394	0.250309	0.250917	0.24593	0.248155	0.261133	0.264416	0.255996	0.246963	0.253789	0.235888	0.242141	0.238936	0.255246	0.23962	0.24916	0.245578	0.239006	0.251703	0.240212	0.240563	0.257009	0.251374	0.252257	0.264619	0.271028	0.235787	0.246179	0.258336	0.250339	0.255313	0.249634	0.258558	0.238377	0.259071	0.256799	0.24443	0.258197	0.273062	0.249303	0.238213	0.249392	0.253407
105	453	0.246653	0.258117	0.275036	0.257734	0.270695	0.249511	0.24728	0.252858	0.24763	0.251587	0.264189	0.251885	0.2495	0.252012	0.255878	0.241255	0.244696	0.244008	0.251524	0.240918	0.252875	0.248981	0.238834	0.255759	0.245325	0.245236	0.252727	0.254728	0.249129	0.264102	0.262811	0.238805	0.24721	0.249229	0.25261	0.255318	0.241537	0.248573	0.241693	0.254493	0.255466	0.244567	0.250327	0.268553	0.243393	0.2435	0.251646	0.252794
106	457	0.235923	0.238167	0.267278	0.247126	0.263973	0.240008	0.229046	0.241915	0.243883	0.231549	0.253352	0.232971	0.232815	0.237365	0.242888	0.231454	0.233496	0.234812	0.235239	0.238081	0.237849	0.239981	0.222918	0.234188	0.237005	0.241979	0.236752	0.230766	0.240032	0.257487	0.252177	0.225621	0.23484	0.238702	0.236546	0.244611	0.230086	0.233524	0.229787	0.242273	0.226183	0.228154	0.22931	0.255557	0.228813	0.236416	0.240264	0.241152
107	458	0.255473	0.256951	0.279035	0.263297	0.270523	0.246273	0.250224	0.248008	0.244509	0.249271	0.259366	0.263187	0.253199	0.248289	0.251458	0.234915	0.239524	0.240452	0.254431	0.240608	0.246405	0.246139	0.234538	0.250069	0.242945	0.243529	0.256747	0.252013	0.24909	0.262851	0.267739	0.234668	0.24421	0.255229	0.250835	0.252905	0.246741	0.25632	0.238794	0.257178	0.256846	0.246973	0.258071	0.270249	0.247872	0.239733	0.247512	0.252289
108	459	0.241334	0.259304	0.27192	0.250417	0.268613	0.254569	0.250154	0.259954	0.260014	0.256859	0.271378	0.236486	0.247211	0.259147	0.262527	0.251117	0.253385	0.255239	0.24545	0.256344	0.260149	0.257718	0.243625	0.258841	0.255165	0.258381	0.242518	0.26012	0.243654	0.267058	0.254691	0.252393	0.257223	0.255211	0.259118	0.258879	0.239077	0.24299	0.254209	0.246582	0.249054	0.248011	0.245149	0.264042	0.240162	0.25392	0.258475	0.260438
109	460	0.231048	0.251144	0.261304	0.237734	0.267179	0.256833	0.249279	0.262553	0.268473	0.258146	0.27907	0.213991	0.237771	0.264652	0.26908	0.258092	0.260014	0.26357	0.236449	0.262065	0.263314	0.264781	0.254184	0.262603	0.263206	0.265139	0.234661	0.261001	0.23885	0.267748	0.240837	0.255019	0.260467	0.254212	0.264177	0.264316	0.240452	0.233617	0.259408	0.241865	0.242425	0.251435	0.232458	0.258522	0.234343	0.263649	0.263825	0.263934
110	462	0.193156	0.227345	0.253516	0.227908	0.257179	0.24226	0.223501	0.250976	0.25176	0.238522	0.265074	0.177107	0.208118	0.247287	0.251969	0.241311	0.246745	0.242058	0.214567	0.244019	0.248131	0.246789	0.232477	0.244827	0.246473	0.250978	0.218153	0.24006	0.223158	0.255081	0.231751	0.24388	0.247073	0.228409	0.247278	0.241564	0.210622	0.1991	0.243494	0.224406	0.218837	0.229833	0.202354	0.242144	0.203815	0.245772	0.247444	0.241495
111	465	0.241824	0.249414	0.267713	0.248432	0.263377	0.243414	0.246453	0.244559	0.243985	0.24519	0.259248	0.242912	0.245853	0.245888	0.248451	0.234261	0.23849	0.237725	0.242519	0.237584	0.245363	0.241704	0.23295	0.249255	0.239108	0.2381	0.243681	0.24668	0.244735	0.256753	0.254875	0.23186	0.241216	0.246551	0.244833	0.249871	0.238603	0.241642	0.233956	0.245495	0.249216	0.240112	0.247537	0.259579	0.232881	0.234647	0.244984	0.250229
112	467	0.262922	0.258189	0.28321	0.265145	0.273634	0.25218	0.253078	0.248619	0.246889	0.249851	0.260138	0.269763	0.256701	0.251802	0.253714	0.238693	0.245804	0.243333	0.259501	0.238715	0.250026	0.243796	0.237523	0.250505	0.241948	0.242011	0.262456	0.253133	0.253908	0.265126	0.272862	0.235909	0.245448	0.258562	0.250937	0.253942	0.247486	0.257558	0.233985	0.258667	0.259555	0.244654	0.261142	0.273372	0.250111	0.239126	0.250169	0.25463
113	48	0.239337	0.253128	0.264832	0.246965	0.264962	0.254435	0.249446	0.255691	0.260501	0.252691	0.272617	0.235301	0.24274	0.252899	0.257987	0.250237	0.252584	0.25321	0.241447	0.249775	0.257635	0.25539	0.247656	0.257693	0.254802	0.253311	0.212258	0.254816	0.24607	0.270023	0.25353	0.248745	0.251097	0.252182	0.254949	0.257014	0.241585	0.243807	0.252101	0.246906	0.24462	0.247966	0.24309	0.263832	0.236365	0.252738	0.258217	0.257838
114	484	0.220079	0.242121	0.255496	0.231517	0.259737	0.248065	0.239252	0.251992	0.256019	0.24711	0.273549	0.207927	0.232124	0.255952	0.262951	0.249775	0.249481	0.253924	0.22921	0.253046	0.257885	0.256088	0.2427	0.254519	0.256478	0.254214	0.229123	0.248607	0.232235	0.260922	0.235913	0.247954	0.25296	0.243251	0.258856	0.253644	0.228581	0.226431	0.250546	0.234096	0.23343	0.242459	0.226987	0.253404	0.224259	0.252534	0.255265	0.253368
115	487	0.258725	0.256902	0.284794	0.267324	0.275813	0.251087	0.25002	0.254722	0.252981	0.249803	0.265412	0.266113	0.255562	0.250459	0.252396	0.244243	0.247818	0.241474	0.255896	0.247324	0.249974	0.248901	0.246459	0.252993	0.250893	0.250028	0.261188	0.250232	0.256406	0.267928	0.274923	0.242682	0.248929	0.253982	0.252517	0.25581	0.248729	0.260053	0.244777	0.261517	0.254567	0.24679	0.258275	0.275799	0.249752	0.248389	0.253086	0.25682
116	489	0.249267	0.247724	0.279128	0.263026	0.271503	0.247845	0.242014	0.24975	0.250658	0.241771	0.260915	0.254766	0.251071	0.246608	0.24987	0.243001	0.239829	0.245172	0.246553	0.246783	0.246386	0.247713	0.244203	0.242681	0.246719	0.248564	0.259632	0.240884	0.255727	0.270518	0.268581	0.237085	0.243586	0.24551	0.248376	0.247991	0.24307	0.251181	0.244474	0.258843	0.243006	0.245472	0.248118	0.267941	0.243437	0.246327	0.251065	0.249686
117	5	0.252562	0.249754	0.278126	0.262841	0.267684	0.246317	0.247463	0.244185	0.243385	0.242379	0.258133	0.259921	0.250583	0.24771	0.251291	0.23274	0.236106	0.240225	0.253905	0.238582	0.245818	0.242245	0.238583	0.243625	0.235527	0.235619	0.257317	0.245387	0.249283	0.262929	0.26951	0.232765	0.239268	0.251533	0.247677	0.254443	0.243186	0.251234	0.238262	0.255598	0.249878	0.240566	0.252107	0.269413	0.245026	0.238658	0.24577	0.249267
118	500	0.257364	0.257131	0.280937	0.267095	0.268745	0.250413	0.251646	0.252674	0.249461	0.247625	0.260429	0.265047	0.255	0.247354	0.24736	0.238892	0.244552	0.235048	0.255756	0.241738	0.248856	0.249135	0.24298	0.25038	0.244523	0.245942	0.261728	0.250035	0.254956	0.267525	0.270999	0.241426	0.240551	0.253455	0.250207	0.254209	0.246246	0.255187	0.241547	0.25826	0.255637	0.247077	0.257211	0.270643	0.25022	0.241583	0.249012	0.254841
119	503	0.237416	0.240041	0.263237	0.253242	0.254742	0.243665	0.234518	0.238007	0.250399	0.238654	0.26365	0.243714	0.240631	0.228241	0.228151	0.24082	0.240872	0.242063	0.240587	0.240213	0.241788	0.244163	0.234748	0.246714	0.24407	0.246961	0.250878	0.240846	0.245278	0.266871	0.259631	0.232971	0.239723	0.244257	0.246103	0.248767	0.237558	0.241153	0.238753	0.249939	0.233904	0.238104	0.24088	0.254195	0.232582	0.241385	0.247575	0.244194
120	504	0.255704	0.253761	0.278143	0.263323	0.269936	0.245717	0.249212	0.248076	0.244081	0.245807	0.25937	0.26274	0.250462	0.24407	0.246413	0.235199	0.242278	0.236837	0.249116	0.240307	0.246097	0.242024	0.241691	0.246373	0.242952	0.244139	0.257555	0.249403	0.252546	0.266752	0.267194	0.232803	0.24024	0.250522	0.245622	0.250374	0.248255	0.253407	0.240446	0.255754	0.252003	0.247753	0.254176	0.268962	0.244299	0.239217	0.245614	0.250833
121	506	0.23608	0.241338	0.260857	0.253861	0.264284	0.242168	0.233529	0.239126	0.248472	0.235873	0.260156	0.240851	0.241913	0.223682	0.229093	0.238428	0.241138	0.243153	0.241634	0.241406	0.245508	0.243798	0.23291	0.245247	0.245531	0.245414	0.246825	0.241527	0.24747	0.267127	0.261051	0.236223	0.238709	0.243718	0.248164	0.244171	0.236174	0.239177	0.240691	0.247283	0.233429	0.239774	0.237099	0.250465	0.237733	0.241347	0.246111	0.245749
122	507	0.241316	0.23667	0.2709	0.252806	0.262732	0.24107	0.232751	0.235645	0.239716	0.227668	0.258296	0.246198	0.242296	0.241452	0.249833	0.231103	0.237793	0.237835	0.242424	0.234921	0.240907	0.240118	0.232551	0.243901	0.236209	0.237371	0.245672	0.230351	0.240643	0.259606	0.259732	0.228877	0.237689	0.246997	0.244783	0.247275	0.233724	0.241974	0.234963	0.243929	0.231493	0.234548	0.239241	0.261883	0.235952	0.238568	0.240365	0.243513
123	508	0.250104	0.246167	0.277153	0.261498	0.270016	0.24676	0.243547	0.243907	0.243016	0.231602	0.262442	0.253495	0.247551	0.248608	0.255926	0.237387	0.238659	0.243327	0.248466	0.242597	0.244198	0.248447	0.236084	0.246433	0.243466	0.242536	0.255072	0.233836	0.247816	0.265365	0.265125	0.23952	0.243464	0.252392	0.248773	0.250087	0.239513	0.24832	0.23941	0.256007	0.24287	0.241142	0.246047	0.270235	0.240435	0.243579	0.246869	0.248494
124	51	0.24963	0.250916	0.275305	0.257762	0.266442	0.24361	0.245569	0.246156	0.246301	0.247064	0.254784	0.256571	0.249187	0.244514	0.248673	0.234249	0.237105	0.235382	0.251715	0.23015	0.24681	0.239774	0.229161	0.244287	0.233874	0.236897	0.25456	0.246104	0.24508	0.259738	0.264783	0.233246	0.234762	0.251828	0.246968	0.250037	0.242066	0.250778	0.237127	0.252384	0.251495	0.239077	0.253274	0.267078	0.239397	0.235193	0.244326	0.250373
125	510	0.251229	0.249978	0.27624	0.260396	0.267391	0.24357	0.242702	0.24506	0.241201	0.244827	0.258543	0.26052	0.251249	0.243457	0.248431	0.233914	0.237743	0.235047	0.250241	0.238504	0.245964	0.239704	0.231644	0.247988	0.237846	0.238322	0.256746	0.244255	0.249758	0.262932	0.265977	0.229956	0.241171	0.250375	0.243771	0.246515	0.241136	0.251015	0.235055	0.255444	0.251798	0.238068	0.254557	0.26673	0.240502	0.236604	0.245464	0.249593
126	511	0.208567	0.238632	0.262215	0.238511	0.261688	0.247724	0.233016	0.254064	0.257548	0.240631	0.269449	0.18673	0.214853	0.253856	0.256563	0.252077	0.248435	0.252518	0.22756	0.250838	0.250528	0.25611	0.242893	0.252731	0.255851	0.2547	0.232487	0.24444	0.237318	0.26046	0.244704	0.240507	0.250896	0.237375	0.252415	0.250037	0.218333	0.215755	0.249848	0.236576	0.226998	0.238586	0.213919	0.252207	0.213902	0.253528	0.255416	0.249814
127	513	0.233869	0.234768	0.268154	0.248707	0.25671	0.239498	0.227722	0.239112	0.233391	0.226998	0.252748	0.235175	0.232319	0.238853	0.244486	0.230871	0.22907	0.23948	0.230135	0.230254	0.239007	0.236243	0.220427	0.238834	0.233815	0.236241	0.238937	0.227901	0.235839	0.256696	0.249954	0.223905	0.233416	0.238348	0.241458	0.244655	0.227417	0.233604	0.225285	0.242777	0.228498	0.226653	0.237455	0.25323	0.225466	0.231178	0.237479	0.237309
128	514	0.244909	0.247651	0.264053	0.258835	0.256501	0.243934	0.240932	0.239971	0.247698	0.23984	0.261416	0.250203	0.245003	0.22558	0.230163	0.237792	0.241825	0.241711	0.244183	0.240483	0.247268	0.247051	0.236591	0.245966	0.245322	0.246484	0.254867	0.243422	0.248392	0.267136	0.264556	0.233426	0.241838	0.247149	0.246209	0.248513	0.242535	0.249274	0.235039	0.252145	0.241562	0.241917	0.246289	0.258421	0.241944	0.241571	0.248086	0.249726
129	518	0.245795	0.245171	0.271749	0.255779	0.266494	0.237856	0.239459	0.239354	0.24264	0.238655	0.254709	0.251376	0.245311	0.240015	0.242986	0.232679	0.232978	0.232228	0.246367	0.230642	0.23887	0.237016	0.227106	0.242241	0.237475	0.238238	0.251523	0.239429	0.243843	0.260283	0.263651	0.225298	0.234805	0.24678	0.241594	0.243722	0.239271	0.245799	0.232322	0.251009	0.243734	0.241465	0.244335	0.264255	0.237272	0.235496	0.240738	0.246419
130	519	0.252651	0.252883	0.278599	0.261425	0.270191	0.248297	0.243927	0.246776	0.244572	0.246535	0.261036	0.262368	0.250167	0.24471	0.247833	0.234259	0.243404	0.237889	0.252251	0.240762	0.245123	0.243704	0.235642	0.24721	0.244108	0.242885	0.254134	0.246229	0.250014	0.264277	0.269931	0.235639	0.243844	0.251077	0.245627	0.251295	0.242502	0.253912	0.239406	0.255498	0.249479	0.24213	0.254706	0.270613	0.244482	0.241763	0.246557	0.251927
131	523	0.248707	0.248265	0.274475	0.25908	0.265456	0.245856	0.245422	0.245386	0.243723	0.238947	0.258692	0.255729	0.247047	0.242403	0.245349	0.236237	0.240038	0.235549	0.245914	0.239033	0.242576	0.242841	0.236623	0.24433	0.241176	0.239719	0.251756	0.241717	0.246132	0.263648	0.265986	0.229675	0.238548	0.248214	0.243486	0.247722	0.241107	0.248966	0.234298	0.253122	0.247958	0.242013	0.251975	0.266956	0.239729	0.240103	0.245114	0.249092
132	540	0.247791	0.25072	0.269429	0.263628	0.259595	0.248438	0.245614	0.243772	0.253851	0.245613	0.267468	0.252931	0.249701	0.22712	0.234959	0.245611	0.24635	0.247619	0.248766	0.24596	0.251063	0.249844	0.241775	0.251141	0.249535	0.253206	0.26113	0.249785	0.256879	0.274028	0.267473	0.244972	0.24497	0.251467	0.25364	0.253369	0.246094	0.251417	0.248388	0.257599	0.246574	0.247822	0.249326	0.256802	0.241504	0.247049	0.252529	0.254859
133	541	0.247482	0.251701	0.265183	0.261518	0.262165	0.247304	0.243298	0.241275	0.252062	0.24312	0.266214	0.250714	0.24684	0.229123	0.234277	0.243121	0.244461	0.247278	0.246907	0.242762	0.248693	0.248905	0.240631	0.250362	0.249791	0.249941	0.255369	0.247243	0.254761	0.270469	0.266251	0.238813	0.244058	0.249068	0.250821	0.249982	0.244105	0.249692	0.242163	0.254857	0.244895	0.247507	0.248246	0.259169	0.239937	0.246282	0.249254	0.251382
134	542	0.241654	0.246243	0.264658	0.259907	0.259833	0.245701	0.2416	0.239758	0.250583	0.242358	0.263916	0.247731	0.244942	0.223412	0.232169	0.243844	0.242078	0.242186	0.24504	0.241176	0.248373	0.247146	0.240222	0.24927	0.244934	0.247056	0.25396	0.244015	0.252054	0.26854	0.264032	0.235429	0.242295	0.246919	0.248765	0.249779	0.240697	0.245311	0.242072	0.25225	0.243059	0.242844	0.243749	0.255282	0.23576	0.244295	0.247875	0.250429
135	543	0.248297	0.249233	0.268323	0.261675	0.262313	0.247641	0.245147	0.243934	0.255396	0.246245	0.2657	0.249873	0.248364	0.229108	0.237417	0.246738	0.245032	0.245566	0.248385	0.248381	0.249788	0.25087	0.241403	0.250574	0.249935	0.250257	0.255678	0.247263	0.25404	0.272766	0.267597	0.241545	0.245485	0.250168	0.250656	0.2514	0.24492	0.248279	0.24445	0.255852	0.245305	0.245392	0.248458	0.2601	0.239658	0.24915	0.252346	0.25265
136	545	0.245449	0.245679	0.270597	0.250223	0.26222	0.239448	0.239314	0.236526	0.235671	0.241112	0.252053	0.253234	0.245688	0.240955	0.24501	0.22752	0.230424	0.228841	0.247573	0.230121	0.239599	0.233792	0.227039	0.242183	0.226406	0.232025	0.244795	0.242999	0.239126	0.253268	0.25868	0.224846	0.235342	0.246352	0.238129	0.245042	0.23456	0.243216	0.225687	0.249831	0.247843	0.235878	0.249676	0.262638	0.236803	0.229155	0.236426	0.242523
137	60	0.249725	0.251738	0.272926	0.255806	0.265291	0.241838	0.24315	0.239634	0.238915	0.246252	0.253734	0.25636	0.244608	0.243807	0.248147	0.22904	0.236895	0.236343	0.24882	0.229611	0.24189	0.235868	0.226768	0.242496	0.228105	0.230525	0.250292	0.246194	0.242374	0.254783	0.259565	0.225159	0.234423	0.25	0.244014	0.249028	0.238457	0.246109	0.227291	0.247929	0.253088	0.237622	0.252328	0.265175	0.238297	0.230685	0.239029	0.244622
138	72	0.249829	0.251226	0.274497	0.26241	0.266498	0.246687	0.246179	0.246738	0.25017	0.244921	0.26238	0.256997	0.250256	0.238222	0.241033	0.242716	0.243561	0.244472	0.248426	0.244053	0.248674	0.25022	0.237401	0.251388	0.246305	0.247704	0.257023	0.247816	0.253324	0.267942	0.268473	0.240461	0.243181	0.251989	0.251014	0.251183	0.243354	0.249072	0.243371	0.257092	0.247624	0.247162	0.252235	0.263355	0.243152	0.242575	0.250055	0.252955
139	73	0.244447	0.244597	0.26813	0.256503	0.263753	0.241094	0.238863	0.239016	0.245406	0.23796	0.258502	0.248494	0.24132	0.232171	0.239147	0.233049	0.236959	0.232893	0.246998	0.235147	0.24313	0.242605	0.226445	0.245781	0.241507	0.240809	0.246666	0.238487	0.245242	0.26358	0.261471	0.232761	0.237979	0.245686	0.246281	0.246104	0.236618	0.243651	0.239384	0.250843	0.240674	0.236116	0.242849	0.260609	0.234568	0.23693	0.241451	0.248071
140	76	0.25097	0.250376	0.275598	0.260411	0.265474	0.244399	0.24404	0.246442	0.24448	0.24117	0.25594	0.257308	0.249146	0.242118	0.244291	0.233346	0.238195	0.229798	0.248034	0.236048	0.242913	0.241854	0.234708	0.246577	0.237292	0.240373	0.254589	0.24075	0.249672	0.261967	0.266833	0.235442	0.239356	0.250264	0.242499	0.249354	0.243659	0.249749	0.236485	0.253573	0.248351	0.242051	0.250849	0.265686	0.238735	0.239319	0.244594	0.246393
141	77	0.249591	0.245549	0.2793	0.263088	0.272248	0.247822	0.244164	0.252007	0.251843	0.226459	0.265354	0.253562	0.25023	0.251076	0.254438	0.245173	0.244148	0.249367	0.2516	0.248168	0.24412	0.255949	0.242745	0.251315	0.250858	0.252279	0.256416	0.229312	0.254825	0.270828	0.269848	0.244773	0.247378	0.250965	0.252081	0.25328	0.246053	0.251948	0.250714	0.257373	0.238714	0.243236	0.246581	0.26951	0.243942	0.249294	0.251624	0.253845
142	8	0.250432	0.247898	0.275339	0.257903	0.267952	0.242065	0.245037	0.244675	0.243945	0.241647	0.250565	0.256021	0.246043	0.245006	0.248605	0.233801	0.225955	0.239714	0.248159	0.233771	0.246288	0.242197	0.235141	0.233995	0.237459	0.237253	0.251851	0.24609	0.25	0.261977	0.264653	0.230636	0.234069	0.247627	0.243639	0.24937	0.241371	0.249241	0.234835	0.253304	0.247917	0.24186	0.246449	0.264985	0.241808	0.236084	0.24165	0.248273
143	80	0.246303	0.241592	0.280152	0.26279	0.27487	0.248389	0.237651	0.255099	0.253773	0.212803	0.267729	0.24588	0.245766	0.25415	0.258813	0.247415	0.249008	0.253041	0.250508	0.252136	0.245389	0.255791	0.251486	0.249288	0.254603	0.253617	0.256531	0.208943	0.255411	0.272991	0.268657	0.245953	0.248081	0.253694	0.251429	0.254948	0.246337	0.247815	0.252365	0.257265	0.232873	0.244151	0.241776	0.269452	0.242808	0.24909	0.252389	0.251155
144	85	0.271278	0.269297	0.291622	0.275713	0.28311	0.25947	0.263169	0.260423	0.257226	0.260485	0.270102	0.280836	0.265796	0.26319	0.26604	0.249225	0.252297	0.252644	0.266869	0.251195	0.262891	0.253966	0.252494	0.263192	0.248532	0.251606	0.268767	0.261772	0.260374	0.271689	0.280883	0.248492	0.257753	0.266924	0.2582	0.266199	0.258995	0.268669	0.24697	0.27381	0.269243	0.257927	0.272186	0.28089	0.260723	0.247684	0.259089	0.265507
145	90	0.252711	0.234636	0.280379	0.266642	0.276167	0.246834	0.228778	0.259029	0.261583	0.249786	0.273375	0.253179	0.255921	0.252661	0.255375	0.254176	0.253095	0.24819	0.255512	0.255959	0.254472	0.260429	0.247952	0.257357	0.258298	0.260154	0.261333	0.252599	0.259502	0.278451	0.272782	0.250636	0.255355	0.258792	0.25841	0.259887	0.250079	0.252175	0.254891	0.262123	0.219728	0.23735	0.251339	0.272838	0.249138	0.256769	0.262216	0.245318
146	N10	0.253714	0.254475	0.278584	0.261918	0.269876	0.247564	0.246835	0.24925	0.248145	0.247861	0.262194	0.260641	0.250558	0.244904	0.249023	0.24219	0.242606	0.246825	0.251005	0.244193	0.249808	0.247586	0.241239	0.248827	0.247489	0.246918	0.259635	0.247612	0.255265	0.268929	0.269642	0.236273	0.248351	0.251356	0.249835	0.2508	0.244713	0.255361	0.242394	0.258186	0.248793	0.246838	0.253218	0.269313	0.243855	0.244548	0.248296	0.253722
147	N8	0.259086	0.255166	0.286338	0.268405	0.276726	0.249913	0.251481	0.25568	0.253439	0.252241	0.268255	0.264812	0.260354	0.258532	0.261983	0.248723	0.249694	0.252809	0.26321	0.250498	0.254976	0.253411	0.247211	0.256211	0.250358	0.249809	0.264019	0.255483	0.260407	0.274062	0.275672	0.243872	0.25063	0.257957	0.258298	0.260186	0.252911	0.259453	0.248018	0.266287	0.252615	0.25161	0.258717	0.276865	0.253647	0.250332	0.245833	0.256317
148	N9	0.250424	0.249968	0.274112	0.259632	0.266715	0.24426	0.24423	0.241462	0.242864	0.243401	0.257062	0.257229	0.246777	0.244341	0.249555	0.233089	0.23481	0.240682	0.25232	0.237561	0.244384	0.243873	0.235309	0.246	0.238279	0.240361	0.252779	0.247473	0.246682	0.263193	0.265292	0.232187	0.238636	0.249031	0.24698	0.248321	0.241526	0.249112	0.236205	0.251747	0.248585	0.239417	0.250624	0.266294	0.243366	0.238426	0.242907	0.25109
[truncated: 99 more columns]
