# Supplementary material for: Development of core-collections for Guizhou tea genetic resources and GWAS of leaf size using SNP developed by genotyping-by-sequencing
Source: PeerJ. 2020 Mar 13;8:e8572. doi: 10.7717/peerj.8572 (PMC7075365; doi:10.7717/peerj.8572)
Supplement: Table S6 [file peerj-08-8572-s012.xlsx]

## Sheet: Sheet1
Table S6 The information of scaffold and SNP position in the genome Corresponding to the name of pseudo-group(PG)
	Scaffold in the genome		Name of pseudo-group(PG)	Pseudo-Group(PG)
Scaffold	Start position(bp)	End position(bp)		Start position	End position
Sc0000000	1	3505831	PG_1	1	3505831
Sc0000001	1	3488299	PG_1	3505982	6994280
Sc0000002	1	2866215	PG_1	6994431	9860645
Sc0000003	1	2774837	PG_1	9860796	12635632
Sc0000004	1	2768176	PG_1	12635783	15403958
Sc0000005	1	2756750	PG_1	15404109	18160858
Sc0000006	1	2627294	PG_1	18161009	20788302
Sc0000007	1	2472379	PG_1	20788453	23260831
Sc0000008	1	2452568	PG_1	23260982	25713549
Sc0000009	1	2394593	PG_1	25713700	28108292
Sc0000010	1	2242734	PG_1	28108443	30351176
Sc0000011	1	2232160	PG_1	30351327	32583486
Sc0000012	1	2183827	PG_1	32583637	34767463
Sc0000013	1	2160176	PG_1	34767614	36927789
Sc0000014	1	2145899	PG_1	36927940	39073838
Sc0000015	1	2139691	PG_1	39073989	41213679
Sc0000016	1	2130739	PG_1	41213830	43344568
Sc0000017	1	2116971	PG_1	43344719	45461689
Sc0000018	1	2085111	PG_1	45461840	47546950
Sc0000019	1	2077841	PG_1	47547101	49624941
Sc0000020	1	2072804	PG_1	49625092	51697895
Sc0000021	1	1997314	PG_1	51698046	53695359
Sc0000022	1	1978029	PG_1	53695510	55673538
Sc0000023	1	1969321	PG_1	55673689	57643009
Sc0000024	1	1953090	PG_1	57643160	59596249
Sc0000025	1	1918320	PG_1	59596400	61514719
Sc0000026	1	1912720	PG_1	61514870	63427589
Sc0000027	1	1895184	PG_1	63427740	65322923
Sc0000028	1	1862716	PG_1	65323074	67185789
Sc0000030	1	1857641	PG_1	67185940	69043580
Sc0000031	1	1855733	PG_1	69043731	70899463
Sc0000029	1	1851997	PG_1	70899614	72751610
Sc0000032	1	1848282	PG_1	72751761	74600042
Sc0000033	1	1846628	PG_1	74600193	76446820
Sc0000034	1	1816043	PG_1	76446971	78263013
Sc0000035	1	1812323	PG_1	78263164	80075486
Sc0000036	1	1787840	PG_1	80075637	81863476
Sc0000037	1	1785730	PG_1	81863627	83649356
Sc0000038	1	1779563	PG_1	83649507	85429069
Sc0000039	1	1760926	PG_1	85429220	87190145
Sc0000040	1	1739938	PG_1	87190296	88930233
Sc0000041	1	1739217	PG_1	88930384	90669600
Sc0000042	1	1733600	PG_1	90669751	92403350
Sc0000043	1	1721105	PG_1	92403501	94124605
Sc0000044	1	1709149	PG_1	94124756	95833904
Sc0000045	1	1706184	PG_1	95834055	97540238
Sc0000046	1	1704950	PG_1	97540389	99245338
Sc0000047	1	1704396	PG_1	99245489	100949884
Sc0000048	1	1704275	PG_1	100950035	102654309
Sc0000049	1	1687926	PG_1	102654460	104342385
Sc0000050	1	1685924	PG_1	104342536	106028459
Sc0000051	1	1682043	PG_1	106028610	107710652
Sc0000052	1	1680087	PG_1	107710803	109390889
Sc0000053	1	1675929	PG_1	109391040	111066968
Sc0000054	1	1665881	PG_1	111067119	112732999
Sc0000055	1	1653717	PG_1	112733150	114386866
Sc0000056	1	1646439	PG_1	114387017	116033455
Sc0000057	1	1638040	PG_1	116033606	117671645
Sc0000058	1	1636700	PG_1	117671796	119308495
Sc0000059	1	1626549	PG_1	119308646	120935194
Sc0000060	1	1618733	PG_1	120935345	122554077
Sc0000061	1	1617378	PG_1	122554228	124171605
Sc0000062	1	1614946	PG_1	124171756	125786701
Sc0000063	1	1614615	PG_1	125786852	127401466
Sc0000064	1	1614465	PG_1	127401617	129016081
Sc0000065	1	1613803	PG_1	129016232	130630034
Sc0000066	1	1601199	PG_1	130630185	132231383
Sc0000067	1	1600708	PG_1	132231534	133832241
Sc0000068	1	1594770	PG_1	133832392	135427161
Sc0000069	1	1592882	PG_1	135427312	137020193
Sc0000070	1	1584764	PG_1	137020344	138605107
Sc0000071	1	1557248	PG_1	138605258	140162505
Sc0000072	1	1555222	PG_1	140162656	141717877
Sc0000073	1	1553600	PG_1	141718028	143271627
Sc0000074	1	1552684	PG_1	143271778	144824461
Sc0000075	1	1552168	PG_1	144824612	146376779
Sc0000076	1	1549208	PG_1	146376930	147926137
Sc0000077	1	1547158	PG_1	147926288	149473445
Sc0000078	1	1544293	PG_1	149473596	151017888
Sc0000079	1	1542760	PG_1	151018039	152560798
Sc0000080	1	1542334	PG_2	1	1542334
Sc0000081	1	1534801	PG_2	1542485	3077285
Sc0000082	1	1532292	PG_2	3077436	4609727
Sc0000083	1	1531730	PG_2	4609878	6141607
Sc0000084	1	1526785	PG_2	6141758	7668542
Sc0000085	1	1523955	PG_2	7668693	9192647
Sc0000086	1	1523670	PG_2	9192798	10716467
Sc0000087	1	1520671	PG_2	10716618	12237288
Sc0000088	1	1519945	PG_2	12237439	13757383
Sc0000089	1	1513971	PG_2	13757534	15271504
Sc0000090	1	1512872	PG_2	15271655	16784526
Sc0000091	1	1506918	PG_2	16784677	18291594
Sc0000092	1	1504908	PG_2	18291745	19796652
Sc0000093	1	1498379	PG_2	19796803	21295181
Sc0000094	1	1496269	PG_2	21295332	22791600
Sc0000095	1	1492033	PG_2	22791751	24283783
Sc0000096	1	1481612	PG_2	24283934	25765545
Sc0000097	1	1479394	PG_2	25765696	27245089
Sc0000098	1	1474693	PG_2	27245240	28719932
Sc0000099	1	1473456	PG_2	28720083	30193538
Sc0000100	1	1470502	PG_2	30193689	31664190
Sc0000101	1	1469028	PG_2	31664341	33133368
Sc0000102	1	1466363	PG_2	33133519	34599881
Sc0000103	1	1450114	PG_2	34600032	36050145
Sc0000104	1	1449161	PG_2	36050296	37499456
Sc0000105	1	1447525	PG_2	37499607	38947131
Sc0000106	1	1447081	PG_2	38947282	40394362
Sc0000107	1	1445653	PG_2	40394513	41840165
Sc0000108	1	1445295	PG_2	41840316	43285610
xpSc0053207	1	1443986	PG_2	43285761	44729746
Sc0000109	1	1443647	PG_2	44729897	46173543
Sc0000110	1	1442643	PG_2	46173694	47616336
Sc0000111	1	1426626	PG_2	47616487	49043112
Sc0000112	1	1420129	PG_2	49043263	50463391
Sc0000113	1	1411054	PG_2	50463542	51874595
Sc0000114	1	1410183	PG_2	51874746	53284928
Sc0000115	1	1407288	PG_2	53285079	54692366
Sc0000116	1	1397281	PG_2	54692517	56089797
Sc0000117	1	1387080	PG_2	56089948	57477027
Sc0000118	1	1386285	PG_2	57477178	58863462
Sc0000119	1	1385394	PG_2	58863613	60249006
Sc0000120	1	1376511	PG_2	60249157	61625667
Sc0000121	1	1372375	PG_2	61625818	62998192
Sc0000122	1	1370488	PG_2	62998343	64368830
Sc0000123	1	1362796	PG_2	64368981	65731776
Sc0000124	1	1361246	PG_2	65731927	67093172
Sc0000125	1	1360871	PG_2	67093323	68454193
Sc0000126	1	1359908	PG_2	68454344	69814251
Sc0000127	1	1357158	PG_2	69814402	71171559
Sc0000128	1	1354932	PG_2	71171710	72526641
Sc0000129	1	1352396	PG_2	72526792	73879187
Sc0000130	1	1347092	PG_2	73879338	75226429
Sc0000131	1	1343576	PG_2	75226580	76570155
Sc0000132	1	1343246	PG_2	76570306	77913551
Sc0000133	1	1343197	PG_2	77913702	79256898
Sc0000134	1	1338960	PG_2	79257049	80596008
Sc0000135	1	1338410	PG_2	80596159	81934568
Sc0000136	1	1337787	PG_2	81934719	83272505
Sc0000137	1	1335181	PG_2	83272656	84607836
Sc0000138	1	1330812	PG_2	84607987	85938798
Sc0000139	1	1326898	PG_2	85938949	87265846
Sc0000140	1	1325700	PG_2	87265997	88591696
Sc0000141	1	1318007	PG_2	88591847	89909853
Sc0000142	1	1317161	PG_2	89910004	91227164
Sc0000143	1	1313640	PG_2	91227315	92540954
Sc0000144	1	1311401	PG_2	92541105	93852505
Sc0000145	1	1309739	PG_2	93852656	95162394
Sc0000146	1	1304688	PG_2	95162545	96467232
Sc0000147	1	1300659	PG_2	96467383	97768041
Sc0000148	1	1300154	PG_2	97768192	99068345
Sc0000149	1	1297221	PG_2	99068496	100365716
Sc0000150	1	1296093	PG_2	100365867	101661959
Sc0000151	1	1291120	PG_2	101662110	102953229
Sc0000152	1	1279633	PG_2	102953380	104233012
Sc0000153	1	1276401	PG_2	104233163	105509563
Sc0000154	1	1276329	PG_2	105509714	106786042
Sc0000155	1	1274906	PG_2	106786193	108061098
Sc0000156	1	1272435	PG_2	108061249	109333683
Sc0000157	1	1270552	PG_2	109333834	110604385
Sc0000158	1	1269220	PG_2	110604536	111873755
Sc0000159	1	1263134	PG_2	111873906	113137039
Sc0000160	1	1259418	PG_2	113137190	114396607
Sc0000161	1	1259327	PG_2	114396758	115656084
Sc0000162	1	1255925	PG_2	115656235	116912159
Sc0000163	1	1253236	PG_2	116912310	118165545
Sc0000164	1	1253181	PG_2	118165696	119418876
Sc0000165	1	1252210	PG_2	119419027	120671236
Sc0000166	1	1251749	PG_2	120671387	121923135
Sc0000167	1	1246217	PG_2	121923286	123169502
Sc0000168	1	1245941	PG_2	123169653	124415593
Sc0000169	1	1242816	PG_2	124415744	125658559
Sc0000170	1	1241967	PG_2	125658710	126900676
Sc0000171	1	1237678	PG_2	126900827	128138504
Sc0000172	1	1232308	PG_2	128138655	129370962
Sc0000173	1	1226955	PG_2	129371113	130598067
Sc0000174	1	1225747	PG_2	130598218	131823964
Sc0000175	1	1222492	PG_2	131824115	133046606
Sc0000176	1	1222232	PG_2	133046757	134268988
Sc0000177	1	1221511	PG_2	134269139	135490649
Sc0000178	1	1220200	PG_2	135490800	136710999
Sc0000179	1	1219724	PG_2	136711150	137930873
Sc0000180	1	1219240	PG_2	137931024	139150263
Sc0000181	1	1217471	PG_2	139150414	140367884
Sc0000182	1	1215671	PG_2	140368035	141583705
Sc0000183	1	1213806	PG_2	141583856	142797661
Sc0000184	1	1209259	PG_2	142797812	144007070
Sc0000185	1	1209174	PG_2	144007221	145216394
Sc0000186	1	1208344	PG_2	145216545	146424888
Sc0000187	1	1208289	PG_2	146425039	147633327
Sc0000188	1	1205397	PG_2	147633478	148838874
Sc0000189	1	1205296	PG_2	148839025	150044320
Sc0000190	1	1200265	PG_2	150044471	151244735
Sc0000191	1	1199554	PG_2	151244886	152444439
Sc0000192	1	1199289	PG_3	1	1199289
Sc0000193	1	1195690	PG_3	1199440	2395129
Sc0000194	1	1194170	PG_3	2395280	3589449
Sc0000195	1	1193207	PG_3	3589600	4782806
Sc0000196	1	1192862	PG_3	4782957	5975818
Sc0000197	1	1192629	PG_3	5975969	7168597
Sc0000198	1	1192539	PG_3	7168748	8361286
Sc0000199	1	1192360	PG_3	8361437	9553796
Sc0000200	1	1189275	PG_3	9553947	10743221
Sc0000201	1	1187520	PG_3	10743372	11930891
Sc0000202	1	1186545	PG_3	11931042	13117586
Sc0000203	1	1182632	PG_3	13117737	14300368
Sc0000204	1	1177898	PG_3	14300519	15478416
Sc0000205	1	1177065	PG_3	15478567	16655631
Sc0000206	1	1176896	PG_3	16655782	17832677
Sc0000207	1	1176680	PG_3	17832828	19009507
Sc0000208	1	1175087	PG_3	19009658	20184744
Sc0000209	1	1171721	PG_3	20184895	21356615
Sc0000210	1	1169873	PG_3	21356766	22526638
Sc0000211	1	1165446	PG_3	22526789	23692234
Sc0000212	1	1164777	PG_3	23692385	24857161
Sc0000213	1	1164490	PG_3	24857312	26021801
Sc0000214	1	1163885	PG_3	26021952	27185836
Sc0000215	1	1163066	PG_3	27185987	28349052
Sc0000216	1	1161854	PG_3	28349203	29511056
Sc0000217	1	1161358	PG_3	29511207	30672564
Sc0000218	1	1159853	PG_3	30672715	31832567
Sc0000219	1	1157639	PG_3	31832718	32990356
Sc0000220	1	1152977	PG_3	32990507	34143483
Sc0000221	1	1151308	PG_3	34143634	35294941
Sc0000222	1	1150964	PG_3	35295092	36446055
Sc0000223	1	1150732	PG_3	36446206	37596937
Sc0000224	1	1149505	PG_3	37597088	38746592
Sc0000225	1	1148840	PG_3	38746743	39895582
Sc0000226	1	1147288	PG_3	39895733	41043020
Sc0000227	1	1147085	PG_3	41043171	42190255
xfSc0000000	1	1145669	PG_3	42190406	43336074
Sc0000228	1	1145568	PG_3	43336225	44481792
Sc0000229	1	1144892	PG_3	44481943	45626834
Sc0000230	1	1144729	PG_3	45626985	46771713
Sc0000231	1	1143357	PG_3	46771864	47915220
Sc0000232	1	1142735	PG_3	47915371	49058105
Sc0000233	1	1140550	PG_3	49058256	50198805
Sc0000234	1	1135475	PG_3	50198956	51334430
Sc0000235	1	1134665	PG_3	51334581	52469245
Sc0000236	1	1132463	PG_3	52469396	53601858
Sc0000237	1	1128927	PG_3	53602009	54730935
Sc0000238	1	1126774	PG_3	54731086	55857859
Sc0000239	1	1124846	PG_3	55858010	56982855
xfSc0000001	1	1124631	PG_3	56983006	58107636
Sc0000240	1	1124208	PG_3	58107787	59231994
Sc0000241	1	1120637	PG_3	59232145	60352781
Sc0000242	1	1119384	PG_3	60352932	61472315
Sc0000243	1	1119060	PG_3	61472466	62591525
Sc0000244	1	1118631	PG_3	62591676	63710306
Sc0000245	1	1117803	PG_3	63710457	64828259
Sc0000246	1	1116952	PG_3	64828410	65945361
Sc0000247	1	1116688	PG_3	65945512	67062199
Sc0000248	1	1116162	PG_3	67062350	68178511
Sc0000249	1	1115561	PG_3	68178662	69294222
Sc0000250	1	1115452	PG_3	69294373	70409824
Sc0000251	1	1115101	PG_3	70409975	71525075
Sc0000252	1	1114276	PG_3	71525226	72639501
Sc0000253	1	1112671	PG_3	72639652	73752322
Sc0000254	1	1112088	PG_3	73752473	74864560
Sc0000255	1	1111297	PG_3	74864711	75976007
Sc0000256	1	1110561	PG_3	75976158	77086718
Sc0000257	1	1108710	PG_3	77086869	78195578
Sc0000258	1	1108464	PG_3	78195729	79304192
Sc0000259	1	1107727	PG_3	79304343	80412069
Sc0000260	1	1107217	PG_3	80412220	81519436
Sc0000261	1	1105874	PG_3	81519587	82625460
Sc0000262	1	1102649	PG_3	82625611	83728259
Sc0000263	1	1102172	PG_3	83728410	84830581
Sc0000264	1	1100781	PG_3	84830732	85931512
Sc0000265	1	1099939	PG_3	85931663	87031601
Sc0000266	1	1099540	PG_3	87031752	88131291
Sc0000267	1	1097783	PG_3	88131442	89229224
Sc0000268	1	1094299	PG_3	89229375	90323673
Sc0000269	1	1092680	PG_3	90323824	91416503
Sc0000270	1	1092383	PG_3	91416654	92509036
Sc0000271	1	1092229	PG_3	92509187	93601415
Sc0000272	1	1089994	PG_3	93601566	94691559
Sc0000273	1	1089880	PG_3	94691710	95781589
Sc0000274	1	1086863	PG_3	95781740	96868602
xpSc0053208	1	1083393	PG_3	96868753	97952145
Sc0000275	1	1081917	PG_3	97952296	99034212
Sc0000276	1	1081692	PG_3	99034363	100116054
Sc0000277	1	1079875	PG_3	100116205	101196079
Sc0000278	1	1078269	PG_3	101196230	102274498
Sc0000279	1	1077926	PG_3	102274649	103352574
Sc0000280	1	1077225	PG_3	103352725	104429949
Sc0000281	1	1074257	PG_3	104430100	105504356
Sc0000282	1	1070861	PG_3	105504507	106575367
Sc0000283	1	1069325	PG_3	106575518	107644842
Sc0000284	1	1068775	PG_3	107644993	108713767
Sc0000285	1	1067500	PG_3	108713918	109781417
Sc0000286	1	1066911	PG_3	109781568	110848478
Sc0000287	1	1066009	PG_3	110848629	111914637
Sc0000288	1	1064092	PG_3	111914788	112978879
Sc0000289	1	1062839	PG_3	112979030	114041868
Sc0000290	1	1062205	PG_3	114042019	115104223
Sc0000291	1	1061058	PG_3	115104374	116165431
Sc0000292	1	1060414	PG_3	116165582	117225995
Sc0000293	1	1059416	PG_3	117226146	118285561
Sc0000294	1	1059203	PG_3	118285712	119344914
Sc0000295	1	1059195	PG_3	119345065	120404259
Sc0000296	1	1058154	PG_3	120404410	121462563
Sc0000297	1	1057887	PG_3	121462714	122520600
Sc0000298	1	1056439	PG_3	122520751	123577189
Sc0000299	1	1054397	PG_3	123577340	124631736
Sc0000300	1	1054045	PG_3	124631887	125685931
Sc0000301	1	1053701	PG_3	125686082	126739782
Sc0000302	1	1053634	PG_3	126739933	127793566
Sc0000303	1	1053227	PG_3	127793717	128846943
Sc0000304	1	1052295	PG_3	128847094	129899388
Sc0000305	1	1051542	PG_3	129899539	130951080
Sc0000306	1	1050427	PG_3	130951231	132001657
Sc0000307	1	1049867	PG_3	132001808	133051674
Sc0000308	1	1049213	PG_3	133051825	134101037
Sc0000309	1	1047471	PG_3	134101188	135148658
Sc0000310	1	1046329	PG_3	135148809	136195137
Sc0000311	1	1045688	PG_3	136195288	137240975
Sc0000312	1	1045537	PG_3	137241126	138286662
Sc0000313	1	1045468	PG_3	138286813	139332280
Sc0000314	1	1044802	PG_3	139332431	140377232
Sc0000315	1	1041372	PG_3	140377383	141418754
Sc0000316	1	1039359	PG_3	141418905	142458263
Sc0000317	1	1034638	PG_3	142458414	143493051
Sc0000318	1	1031633	PG_3	143493202	144524834
Sc0000319	1	1031206	PG_3	144524985	145556190
Sc0000320	1	1031035	PG_3	145556341	146587375
Sc0000321	1	1030777	PG_3	146587526	147618302
Sc0000322	1	1029276	PG_3	147618453	148647728
Sc0000323	1	1029061	PG_3	148647879	149676939
Sc0000324	1	1024926	PG_3	149677090	150702015
Sc0000325	1	1024249	PG_3	150702166	151726414
Sc0000326	1	1023403	PG_4	1	1023403
Sc0000327	1	1021944	PG_4	1023554	2045497
Sc0000328	1	1020721	PG_4	2045648	3066368
Sc0000329	1	1018901	PG_4	3066519	4085419
Sc0000330	1	1017761	PG_4	4085570	5103330
Sc0000331	1	1016783	PG_4	5103481	6120263
Sc0000332	1	1016688	PG_4	6120414	7137101
Sc0000333	1	1016142	PG_4	7137252	8153393
Sc0000334	1	1015415	PG_4	8153544	9168958
Sc0000335	1	1014316	PG_4	9169109	10183424
Sc0000336	1	1014138	PG_4	10183575	11197712
Sc0000337	1	1013200	PG_4	11197863	12211062
Sc0000338	1	1012773	PG_4	12211213	13223985
Sc0000339	1	1012412	PG_4	13224136	14236547
Sc0000340	1	1012067	PG_4	14236698	15248764
Sc0000341	1	1011116	PG_4	15248915	16260030
Sc0000342	1	1010533	PG_4	16260181	17270713
Sc0000343	1	1010133	PG_4	17270864	18280996
Sc0000344	1	1009344	PG_4	18281147	19290490
Sc0000345	1	1007388	PG_4	19290641	20298028
Sc0000346	1	1006252	PG_4	20298179	21304430
Sc0000347	1	1004226	PG_4	21304581	22308806
Sc0000348	1	1002796	PG_4	22308957	23311752
Sc0000349	1	1000444	PG_4	23311903	24312346
xpSc0053209	1	998126	PG_4	24312497	25310622
Sc0000350	1	997968	PG_4	25310773	26308740
Sc0000351	1	997789	PG_4	26308891	27306679
Sc0000352	1	995203	PG_4	27306830	28302032
Sc0000353	1	995055	PG_4	28302183	29297237
Sc0000354	1	994358	PG_4	29297388	30291745
Sc0000355	1	994173	PG_4	30291896	31286068
Sc0000356	1	993949	PG_4	31286219	32280167
Sc0000357	1	993906	PG_4	32280318	33274223
Sc0000358	1	993464	PG_4	33274374	34267837
Sc0000359	1	992996	PG_4	34267988	35260983
Sc0000360	1	992370	PG_4	35261134	36253503
Sc0000361	1	991985	PG_4	36253654	37245638
Sc0000362	1	991071	PG_4	37245789	38236859
Sc0000363	1	988465	PG_4	38237010	39225474
Sc0000364	1	988439	PG_4	39225625	40214063
Sc0000365	1	988308	PG_4	40214214	41202521
Sc0000366	1	986425	PG_4	41202672	42189096
Sc0000367	1	985926	PG_4	42189247	43175172
Sc0000368	1	985839	PG_4	43175323	44161161
Sc0000369	1	985646	PG_4	44161312	45146957
Sc0000370	1	985619	PG_4	45147108	46132726
Sc0000371	1	985130	PG_4	46132877	47118006
Sc0000372	1	984260	PG_4	47118157	48102416
Sc0000373	1	982290	PG_4	48102567	49084856
Sc0000374	1	980739	PG_4	49085007	50065745
Sc0000375	1	980517	PG_4	50065896	51046412
Sc0000376	1	978542	PG_4	51046563	52025104
Sc0000377	1	978541	PG_4	52025255	53003795
Sc0000378	1	977056	PG_4	53003946	53981001
Sc0000379	1	976665	PG_4	53981152	54957816
Sc0000380	1	976597	PG_4	54957967	55934563
Sc0000381	1	976471	PG_4	55934714	56911184
Sc0000382	1	976272	PG_4	56911335	57887606
Sc0000383	1	976202	PG_4	57887757	58863958
Sc0000384	1	975650	PG_4	58864109	59839758
Sc0000385	1	975424	PG_4	59839909	60815332
Sc0000386	1	973727	PG_4	60815483	61789209
Sc0000387	1	972460	PG_4	61789360	62761819
Sc0000388	1	972161	PG_4	62761970	63734130
Sc0000389	1	972110	PG_4	63734281	64706390
Sc0000390	1	970371	PG_4	64706541	65676911
Sc0000391	1	970203	PG_4	65677062	66647264
Sc0000392	1	969323	PG_4	66647415	67616737
Sc0000393	1	968909	PG_4	67616888	68585796
Sc0000394	1	967283	PG_4	68585947	69553229
Sc0000395	1	967093	PG_4	69553380	70520472
Sc0000396	1	966743	PG_4	70520623	71487365
Sc0000397	1	964317	PG_4	71487516	72451832
Sc0000398	1	963747	PG_4	72451983	73415729
Sc0000399	1	962774	PG_4	73415880	74378653
Sc0000400	1	962008	PG_4	74378804	75340811
Sc0000401	1	961549	PG_4	75340962	76302510
Sc0000402	1	960694	PG_4	76302661	77263354
Sc0000403	1	959878	PG_4	77263505	78223382
Sc0000404	1	959140	PG_4	78223533	79182672
Sc0000405	1	958735	PG_4	79182823	80141557
Sc0000406	1	957273	PG_4	80141708	81098980
Sc0000407	1	956809	PG_4	81099131	82055939
Sc0000408	1	956562	PG_4	82056090	83012651
Sc0000409	1	956144	PG_4	83012802	83968945
Sc0000410	1	954767	PG_4	83969096	84923862
Sc0000411	1	954623	PG_4	84924013	85878635
xpSc0053210	1	954471	PG_4	85878786	86833256
Sc0000412	1	954299	PG_4	86833407	87787705
Sc0000413	1	953305	PG_4	87787856	88741160
Sc0000414	1	951370	PG_4	88741311	89692680
Sc0000415	1	951180	PG_4	89692831	90644010
Sc0000416	1	951164	PG_4	90644161	91595324
Sc0000417	1	949436	PG_4	91595475	92544910
Sc0000418	1	949237	PG_4	92545061	93494297
Sc0000419	1	947095	PG_4	93494448	94441542
Sc0000420	1	947009	PG_4	94441693	95388701
Sc0000421	1	946945	PG_4	95388852	96335796
Sc0000422	1	946260	PG_4	96335947	97282206
Sc0000423	1	945868	PG_4	97282357	98228224
Sc0000424	1	945482	PG_4	98228375	99173856
Sc0000425	1	945131	PG_4	99174007	100119137
Sc0000426	1	944826	PG_4	100119288	101064113
Sc0000427	1	944508	PG_4	101064264	102008771
Sc0000428	1	943279	PG_4	102008922	102952200
Sc0000429	1	943185	PG_4	102952351	103895535
Sc0000430	1	942662	PG_4	103895686	104838347
Sc0000431	1	941886	PG_4	104838498	105780383
Sc0000432	1	939961	PG_4	105780534	106720494
xfSc0000002	1	939637	PG_4	106720645	107660281
Sc0000433	1	939263	PG_4	107660432	108599694
Sc0000434	1	938978	PG_4	108599845	109538822
Sc0000435	1	937542	PG_4	109538973	110476514
Sc0000436	1	937072	PG_4	110476665	111413736
Sc0000437	1	935024	PG_4	111413887	112348910
Sc0000438	1	933257	PG_4	112349061	113282317
Sc0000439	1	932301	PG_4	113282468	114214768
Sc0000440	1	931666	PG_4	114214919	115146584
Sc0000441	1	931559	PG_4	115146735	116078293
Sc0000442	1	931517	PG_4	116078444	117009960
Sc0000443	1	931033	PG_4	117010111	117941143
Sc0000444	1	930124	PG_4	117941294	118871417
Sc0000445	1	929420	PG_4	118871568	119800987
Sc0000446	1	929330	PG_4	119801138	120730467
Sc0000447	1	928842	PG_4	120730618	121659459
Sc0000448	1	928339	PG_4	121659610	122587948
Sc0000449	1	928151	PG_4	122588099	123516249
Sc0000450	1	927208	PG_4	123516400	124443607
Sc0000451	1	926831	PG_4	124443758	125370588
Sc0000452	1	926778	PG_4	125370739	126297516
Sc0000453	1	926601	PG_4	126297667	127224267
xfSc0000003	1	926260	PG_4	127224418	128150677
Sc0000454	1	919009	PG_4	128150828	129069836
Sc0000455	1	915463	PG_4	129069987	129985449
Sc0000456	1	915180	PG_4	129985600	130900779
Sc0000457	1	914602	PG_4	130900930	131815531
Sc0000458	1	914372	PG_4	131815682	132730053
Sc0000459	1	913683	PG_4	132730204	133643886
Sc0000460	1	913405	PG_4	133644037	134557441
Sc0000461	1	911887	PG_4	134557592	135469478
Sc0000462	1	911712	PG_4	135469629	136381340
Sc0000463	1	909875	PG_4	136381491	137291365
Sc0000464	1	909730	PG_4	137291516	138201245
Sc0000465	1	907807	PG_4	138201396	139109202
Sc0000466	1	907798	PG_4	139109353	140017150
Sc0000467	1	907531	PG_4	140017301	140924831
Sc0000468	1	907079	PG_4	140924982	141832060
Sc0000469	1	907062	PG_4	141832211	142739272
Sc0000470	1	906576	PG_4	142739423	143645998
Sc0000471	1	905921	PG_4	143646149	144552069
Sc0000472	1	905383	PG_4	144552220	145457602
Sc0000473	1	905265	PG_4	145457753	146363017
Sc0000474	1	905256	PG_4	146363168	147268423
Sc0000475	1	903572	PG_4	147268574	148172145
Sc0000476	1	902936	PG_4	148172296	149075231
Sc0000477	1	901472	PG_4	149075382	149976853
Sc0000478	1	901321	PG_4	149977004	150878324
Sc0000479	1	899215	PG_4	150878475	151777689
Sc0000480	1	899105	PG_5	1	899105
Sc0000481	1	898500	PG_5	899256	1797755
Sc0000482	1	896288	PG_5	1797906	2694193
Sc0000483	1	896255	PG_5	2694344	3590598
Sc0000484	1	895312	PG_5	3590749	4486060
Sc0000485	1	895206	PG_5	4486211	5381416
Sc0000486	1	894444	PG_5	5381567	6276010
Sc0000487	1	893650	PG_5	6276161	7169810
Sc0000488	1	893202	PG_5	7169961	8063162
Sc0000489	1	891978	PG_5	8063313	8955290
Sc0000490	1	891835	PG_5	8955441	9847275
Sc0000491	1	890701	PG_5	9847426	10738126
Sc0000492	1	890504	PG_5	10738277	11628780
Sc0000493	1	889279	PG_5	11628931	12518209
Sc0000494	1	887934	PG_5	12518360	13406293
Sc0000495	1	886713	PG_5	13406444	14293156
Sc0000496	1	886474	PG_5	14293307	15179780
Sc0000497	1	885962	PG_5	15179931	16065892
Sc0000498	1	884811	PG_5	16066043	16950853
Sc0000499	1	884040	PG_5	16951004	17835043
Sc0000500	1	883610	PG_5	17835194	18718803
Sc0000501	1	883471	PG_5	18718954	19602424
Sc0000502	1	882895	PG_5	19602575	20485469
Sc0000503	1	882870	PG_5	20485620	21368489
Sc0000504	1	882146	PG_5	21368640	22250785
Sc0000505	1	881987	PG_5	22250936	23132922
Sc0000506	1	881815	PG_5	23133073	24014887
Sc0000507	1	881744	PG_5	24015038	24896781
Sc0000508	1	881451	PG_5	24896932	25778382
Sc0000509	1	881156	PG_5	25778533	26659688
Sc0000510	1	881128	PG_5	26659839	27540966
xpSc0053211	1	880650	PG_5	27541117	28421766
Sc0000511	1	880546	PG_5	28421917	29302462
Sc0000512	1	880362	PG_5	29302613	30182974
Sc0000513	1	877983	PG_5	30183125	31061107
Sc0000514	1	877858	PG_5	31061258	31939115
Sc0000515	1	876957	PG_5	31939266	32816222
Sc0000516	1	876424	PG_5	32816373	33692796
Sc0000517	1	875310	PG_5	33692947	34568256
xfSc0000004	1	875004	PG_5	34568407	35443410
xpSc0053212	1	874542	PG_5	35443561	36318102
Sc0000518	1	874406	PG_5	36318253	37192658
Sc0000519	1	874191	PG_5	37192809	38066999
Sc0000520	1	873350	PG_5	38067150	38940499
Sc0000521	1	872228	PG_5	38940650	39812877
xfSc0000005	1	870777	PG_5	39813028	40683804
Sc0000522	1	869722	PG_5	40683955	41553676
Sc0000523	1	869263	PG_5	41553827	42423089
xfSc0000006	1	869047	PG_5	42423240	43292286
Sc0000524	1	868363	PG_5	43292437	44160799
Sc0000525	1	868309	PG_5	44160950	45029258
Sc0000526	1	867568	PG_5	45029409	45896976
Sc0000527	1	867267	PG_5	45897127	46764393
Sc0000528	1	866922	PG_5	46764544	47631465
Sc0000529	1	865156	PG_5	47631616	48496771
Sc0000530	1	865008	PG_5	48496922	49361929
xfSc0000007	1	864255	PG_5	49362080	50226334
Sc0000531	1	864141	PG_5	50226485	51090625
Sc0000532	1	863981	PG_5	51090776	51954756
Sc0000533	1	863324	PG_5	51954907	52818230
Sc0000534	1	863253	PG_5	52818381	53681633
Sc0000535	1	862751	PG_5	53681784	54544534
Sc0000536	1	862345	PG_5	54544685	55407029
Sc0000537	1	862239	PG_5	55407180	56269418
Sc0000538	1	861917	PG_5	56269569	57131485
Sc0000539	1	861816	PG_5	57131636	57993451
Sc0000540	1	859775	PG_5	57993602	58853376
Sc0000541	1	858916	PG_5	58853527	59712442
Sc0000542	1	858227	PG_5	59712593	60570819
Sc0000543	1	857682	PG_5	60570970	61428651
Sc0000544	1	857270	PG_5	61428802	62286071
Sc0000545	1	856010	PG_5	62286222	63142231
Sc0000546	1	855849	PG_5	63142382	63998230
Sc0000547	1	854645	PG_5	63998381	64853025
Sc0000548	1	854381	PG_5	64853176	65707556
Sc0000549	1	853423	PG_5	65707707	66561129
Sc0000550	1	853405	PG_5	66561280	67414684
Sc0000551	1	853116	PG_5	67414835	68267950
Sc0000552	1	852761	PG_5	68268101	69120861
Sc0000553	1	852129	PG_5	69121012	69973140
Sc0000554	1	851569	PG_5	69973291	70824859
Sc0000555	1	850832	PG_5	70825010	71675841
Sc0000556	1	850647	PG_5	71675992	72526638
Sc0000557	1	850568	PG_5	72526789	73377356
Sc0000558	1	850031	PG_5	73377507	74227537
Sc0000559	1	849517	PG_5	74227688	75077204
Sc0000560	1	847994	PG_5	75077355	75925348
Sc0000561	1	846545	PG_5	75925499	76772043
Sc0000562	1	846217	PG_5	76772194	77618410
Sc0000563	1	846203	PG_5	77618561	78464763
Sc0000564	1	845960	PG_5	78464914	79310873
Sc0000565	1	845527	PG_5	79311024	80156550
Sc0000566	1	844839	PG_5	80156701	81001539
Sc0000567	1	844101	PG_5	81001690	81845790
Sc0000568	1	843755	PG_5	81845941	82689695
Sc0000569	1	842100	PG_5	82689846	83531945
Sc0000570	1	841775	PG_5	83532096	84373870
Sc0000571	1	841216	PG_5	84374021	85215236
xpSc0053213	1	840422	PG_5	85215387	86055808
Sc0000572	1	838903	PG_5	86055959	86894861
Sc0000573	1	838747	PG_5	86895012	87733758
Sc0000574	1	838118	PG_5	87733909	88572026
Sc0000575	1	836989	PG_5	88572177	89409165
Sc0000576	1	836209	PG_5	89409316	90245524
Sc0000577	1	835600	PG_5	90245675	91081274
Sc0000578	1	832282	PG_5	91081425	91913706
Sc0000579	1	831488	PG_5	91913857	92745344
Sc0000580	1	830016	PG_5	92745495	93575510
Sc0000581	1	829427	PG_5	93575661	94405087
Sc0000582	1	829033	PG_5	94405238	95234270
Sc0000583	1	828737	PG_5	95234421	96063157
Sc0000584	1	828267	PG_5	96063308	96891574
xfSc0000008	1	828257	PG_5	96891725	97719981
Sc0000585	1	827891	PG_5	97720132	98548022
Sc0000586	1	826341	PG_5	98548173	99374513
Sc0000587	1	826105	PG_5	99374664	100200768
Sc0000588	1	825533	PG_5	100200919	101026451
Sc0000589	1	824940	PG_5	101026602	101851541
Sc0000590	1	824095	PG_5	101851692	102675786
Sc0000591	1	823473	PG_5	102675937	103499409
Sc0000592	1	822352	PG_5	103499560	104321911
Sc0000593	1	820029	PG_5	104322062	105142090
Sc0000594	1	819904	PG_5	105142241	105962144
xpSc0053214	1	819837	PG_5	105962295	106782131
xpSc0053215	1	819609	PG_5	106782282	107601890
Sc0000595	1	819124	PG_5	107602041	108421164
Sc0000596	1	818822	PG_5	108421315	109240136
Sc0000597	1	818723	PG_5	109240287	110059009
Sc0000598	1	817059	PG_5	110059160	110876218
Sc0000599	1	816864	PG_5	110876369	111693232
Sc0000600	1	816606	PG_5	111693383	112509988
Sc0000601	1	816538	PG_5	112510139	113326676
Sc0000602	1	814239	PG_5	113326827	114141065
Sc0000603	1	814032	PG_5	114141216	114955247
Sc0000604	1	813413	PG_5	114955398	115768810
Sc0000605	1	813281	PG_5	115768961	116582241
Sc0000606	1	812684	PG_5	116582392	117395075
Sc0000607	1	812492	PG_5	117395226	118207717
Sc0000608	1	812450	PG_5	118207868	119020317
Sc0000609	1	812211	PG_5	119020468	119832678
Sc0000610	1	811151	PG_5	119832829	120643979
Sc0000611	1	810678	PG_5	120644130	121454807
Sc0000612	1	809623	PG_5	121454958	122264580
Sc0000613	1	809378	PG_5	122264731	123074108
Sc0000614	1	808708	PG_5	123074259	123882966
Sc0000615	1	808578	PG_5	123883117	124691694
Sc0000616	1	808125	PG_5	124691845	125499969
xfSc0000009	1	807753	PG_5	125500120	126307872
Sc0000617	1	807545	PG_5	126308023	127115567
Sc0000618	1	807376	PG_5	127115718	127923093
Sc0000619	1	807300	PG_5	127923244	128730543
Sc0000620	1	807195	PG_5	128730694	129537888
Sc0000621	1	806564	PG_5	129538039	130344602
Sc0000622	1	806517	PG_5	130344753	131151269
Sc0000623	1	806438	PG_5	131151420	131957857
Sc0000624	1	806177	PG_5	131958008	132764184
Sc0000625	1	805869	PG_5	132764335	133570203
Sc0000626	1	805570	PG_5	133570354	134375923
Sc0000627	1	805114	PG_5	134376074	135181187
Sc0000628	1	804995	PG_5	135181338	135986332
Sc0000629	1	804029	PG_5	135986483	136790511
Sc0000630	1	803165	PG_5	136790662	137593826
Sc0000631	1	802724	PG_5	137593977	138396700
Sc0000632	1	801957	PG_5	138396851	139198807
Sc0000633	1	800943	PG_5	139198958	139999900
Sc0000634	1	800790	PG_5	140000051	140800840
Sc0000635	1	800355	PG_5	140800991	141601345
Sc0000636	1	798874	PG_5	141601496	142400369
Sc0000637	1	798607	PG_5	142400520	143199126
Sc0000638	1	798478	PG_5	143199277	143997754
Sc0000639	1	798045	PG_5	143997905	144795949
Sc0000640	1	797846	PG_5	144796100	145593945
Sc0000641	1	797349	PG_5	145594096	146391444
xfSc0000010	1	797254	PG_5	146391595	147188848
Sc0000642	1	796125	PG_5	147188999	147985123
Sc0000643	1	795567	PG_5	147985274	148780840
Sc0000644	1	795524	PG_5	148780991	149576514
Sc0000645	1	794736	PG_5	149576665	150371400
Sc0000646	1	794478	PG_5	150371551	151166028
xfSc0000011	1	794286	PG_5	151166179	151960464
Sc0000647	1	793687	PG_6	1	793687
xfSc0000012	1	792953	PG_6	793838	1586790
Sc0000648	1	791331	PG_6	1586941	2378271
Sc0000649	1	791030	PG_6	2378422	3169451
Sc0000650	1	790535	PG_6	3169602	3960136
Sc0000651	1	789408	PG_6	3960287	4749694
Sc0000652	1	789062	PG_6	4749845	5538906
Sc0000653	1	789044	PG_6	5539057	6328100
Sc0000654	1	788799	PG_6	6328251	7117049
Sc0000655	1	788780	PG_6	7117200	7905979
Sc0000656	1	788753	PG_6	7906130	8694882
Sc0000657	1	788690	PG_6	8695033	9483722
Sc0000658	1	787570	PG_6	9483873	10271442
Sc0000659	1	786779	PG_6	10271593	11058371
Sc0000660	1	786237	PG_6	11058522	11844758
Sc0000661	1	785972	PG_6	11844909	12630880
Sc0000662	1	785420	PG_6	12631031	13416450
Sc0000663	1	785341	PG_6	13416601	14201941
Sc0000664	1	784248	PG_6	14202092	14986339
Sc0000665	1	784161	PG_6	14986490	15770650
Sc0000666	1	783069	PG_6	15770801	16553869
Sc0000667	1	782852	PG_6	16554020	17336871
Sc0000668	1	782362	PG_6	17337022	18119383
Sc0000669	1	782031	PG_6	18119534	18901564
Sc0000670	1	781459	PG_6	18901715	19683173
Sc0000671	1	781379	PG_6	19683324	20464702
Sc0000672	1	780908	PG_6	20464853	21245760
Sc0000673	1	780572	PG_6	21245911	22026482
Sc0000674	1	779567	PG_6	22026633	22806199
Sc0000675	1	778561	PG_6	22806350	23584910
Sc0000676	1	778314	PG_6	23585061	24363374
Sc0000677	1	778099	PG_6	24363525	25141623
Sc0000678	1	777799	PG_6	25141774	25919572
Sc0000679	1	777415	PG_6	25919723	26697137
Sc0000680	1	777103	PG_6	26697288	27474390
Sc0000681	1	776579	PG_6	27474541	28251119
Sc0000682	1	776224	PG_6	28251270	29027493
Sc0000683	1	775682	PG_6	29027644	29803325
Sc0000684	1	774955	PG_6	29803476	30578430
Sc0000685	1	774773	PG_6	30578581	31353353
Sc0000686	1	774744	PG_6	31353504	32128247
Sc0000687	1	771881	PG_6	32128398	32900278
Sc0000688	1	771766	PG_6	32900429	33672194
Sc0000689	1	771567	PG_6	33672345	34443911
Sc0000690	1	771374	PG_6	34444062	35215435
Sc0000691	1	771297	PG_6	35215586	35986882
Sc0000692	1	771099	PG_6	35987033	36758131
Sc0000693	1	770902	PG_6	36758282	37529183
Sc0000694	1	770449	PG_6	37529334	38299782
Sc0000695	1	769767	PG_6	38299933	39069699
Sc0000696	1	769280	PG_6	39069850	39839129
Sc0000697	1	768925	PG_6	39839280	40608204
xpSc0053216	1	768787	PG_6	40608355	41377141
Sc0000698	1	768565	PG_6	41377292	42145856
Sc0000699	1	768257	PG_6	42146007	42914263
Sc0000700	1	767941	PG_6	42914414	43682354
Sc0000701	1	767351	PG_6	43682505	44449855
Sc0000702	1	766812	PG_6	44450006	45216817
Sc0000703	1	766104	PG_6	45216968	45983071
Sc0000704	1	765552	PG_6	45983222	46748773
Sc0000705	1	765188	PG_6	46748924	47514111
Sc0000706	1	764912	PG_6	47514262	48279173
Sc0000707	1	764836	PG_6	48279324	49044159
Sc0000708	1	764591	PG_6	49044310	49808900
Sc0000709	1	763898	PG_6	49809051	50572948
Sc0000710	1	763622	PG_6	50573099	51336720
xpSc0053217	1	762895	PG_6	51336871	52099765
Sc0000711	1	762780	PG_6	52099916	52862695
Sc0000712	1	762462	PG_6	52862846	53625307
Sc0000713	1	762253	PG_6	53625458	54387710
Sc0000714	1	762114	PG_6	54387861	55149974
Sc0000715	1	761832	PG_6	55150125	55911956
Sc0000716	1	760948	PG_6	55912107	56673054
Sc0000717	1	760495	PG_6	56673205	57433699
Sc0000718	1	760066	PG_6	57433850	58193915
Sc0000719	1	759789	PG_6	58194066	58953854
Sc0000720	1	759069	PG_6	58954005	59713073
Sc0000721	1	758832	PG_6	59713224	60472055
Sc0000722	1	758510	PG_6	60472206	61230715
Sc0000723	1	758148	PG_6	61230866	61989013
Sc0000724	1	757382	PG_6	61989164	62746545
Sc0000725	1	756322	PG_6	62746696	63503017
Sc0000726	1	756276	PG_6	63503168	64259443
Sc0000727	1	756005	PG_6	64259594	65015598
Sc0000728	1	755997	PG_6	65015749	65771745
Sc0000729	1	754985	PG_6	65771896	66526880
Sc0000730	1	754718	PG_6	66527031	67281748
Sc0000731	1	754466	PG_6	67281899	68036364
Sc0000732	1	754348	PG_6	68036515	68790862
Sc0000733	1	754305	PG_6	68791013	69545317
Sc0000734	1	754132	PG_6	69545468	70299599
Sc0000735	1	753687	PG_6	70299750	71053436
Sc0000736	1	752697	PG_6	71053587	71806283
Sc0000737	1	751964	PG_6	71806434	72558397
Sc0000738	1	751883	PG_6	72558548	73310430
Sc0000739	1	751494	PG_6	73310581	74062074
Sc0000740	1	751421	PG_6	74062225	74813645
Sc0000741	1	751065	PG_6	74813796	75564860
Sc0000742	1	750795	PG_6	75565011	76315805
Sc0000743	1	750750	PG_6	76315956	77066705
Sc0000744	1	750581	PG_6	77066856	77817436
Sc0000745	1	749956	PG_6	77817587	78567542
xfSc0000013	1	749580	PG_6	78567693	79317272
Sc0000746	1	749265	PG_6	79317423	80066687
Sc0000747	1	748882	PG_6	80066838	80815719
Sc0000748	1	748541	PG_6	80815870	81564410
Sc0000749	1	748403	PG_6	81564561	82312963
Sc0000750	1	748347	PG_6	82313114	83061460
Sc0000752	1	747188	PG_6	83061611	83808798
Sc0000753	1	747119	PG_6	83808949	84556067
Sc0000754	1	747014	PG_6	84556218	85303231
Sc0000755	1	746996	PG_6	85303382	86050377
Sc0000751	1	746704	PG_6	86050528	86797231
Sc0000756	1	746315	PG_6	86797382	87543696
Sc0000757	1	745980	PG_6	87543847	88289826
Sc0000758	1	745856	PG_6	88289977	89035832
Sc0000759	1	745504	PG_6	89035983	89781486
Sc0000761	1	745456	PG_6	89781637	90527092
Sc0000762	1	745052	PG_6	90527243	91272294
Sc0000763	1	744694	PG_6	91272445	92017138
Sc0000764	1	744535	PG_6	92017289	92761823
xpSc0053218	1	744031	PG_6	92761974	93506004
Sc0000765	1	743982	PG_6	93506155	94250136
Sc0000766	1	743901	PG_6	94250287	94994187
Sc0000760	1	743344	PG_6	94994338	95737681
xpSc0053219	1	743196	PG_6	95737832	96481027
Sc0000767	1	742827	PG_6	96481178	97224004
Sc0000768	1	742734	PG_6	97224155	97966888
Sc0000769	1	742574	PG_6	97967039	98709612
Sc0000770	1	742137	PG_6	98709763	99451899
Sc0000771	1	741725	PG_6	99452050	100193774
Sc0000772	1	741348	PG_6	100193925	100935272
Sc0000773	1	740385	PG_6	100935423	101675807
Sc0000774	1	740081	PG_6	101675958	102416038
Sc0000775	1	739101	PG_6	102416189	103155289
Sc0000776	1	737400	PG_6	103155440	103892839
Sc0000777	1	736289	PG_6	103892990	104629278
Sc0000778	1	735934	PG_6	104629429	105365362
Sc0000779	1	734703	PG_6	105365513	106100215
Sc0000780	1	734375	PG_6	106100366	106834740
Sc0000781	1	733975	PG_6	106834891	107568865
Sc0000782	1	733566	PG_6	107569016	108302581
Sc0000783	1	733400	PG_6	108302732	109036131
Sc0000784	1	733368	PG_6	109036282	109769649
Sc0000785	1	733078	PG_6	109769800	110502877
Sc0000786	1	732985	PG_6	110503028	111236012
Sc0000787	1	732711	PG_6	111236163	111968873
Sc0000788	1	732633	PG_6	111969024	112701656
Sc0000789	1	732332	PG_6	112701807	113434138
Sc0000790	1	732130	PG_6	113434289	114166418
Sc0000791	1	731726	PG_6	114166569	114898294
Sc0000792	1	729943	PG_6	114898445	115628387
Sc0000793	1	729464	PG_6	115628538	116358001
Sc0000794	1	729405	PG_6	116358152	117087556
Sc0000795	1	728871	PG_6	117087707	117816577
Sc0000796	1	728326	PG_6	117816728	118545053
Sc0000797	1	727467	PG_6	118545204	119272670
Sc0000798	1	727163	PG_6	119272821	119999983
Sc0000799	1	726929	PG_6	120000134	120727062
Sc0000800	1	726899	PG_6	120727213	121454111
Sc0000801	1	726649	PG_6	121454262	122180910
Sc0000802	1	726283	PG_6	122181061	122907343
Sc0000803	1	726155	PG_6	122907494	123633648
Sc0000804	1	726094	PG_6	123633799	124359892
Sc0000805	1	725833	PG_6	124360043	125085875
Sc0000806	1	725830	PG_6	125086026	125811855
Sc0000807	1	725310	PG_6	125812006	126537315
Sc0000808	1	725094	PG_6	126537466	127262559
Sc0000809	1	724809	PG_6	127262710	127987518
Sc0000810	1	724361	PG_6	127987669	128712029
Sc0000811	1	724198	PG_6	128712180	129436377
Sc0000812	1	724051	PG_6	129436528	130160578
Sc0000813	1	724035	PG_6	130160729	130884763
Sc0000814	1	724006	PG_6	130884914	131608919
Sc0000815	1	723982	PG_6	131609070	132333051
Sc0000816	1	723960	PG_6	132333202	133057161
Sc0000817	1	723789	PG_6	133057312	133781100
Sc0000818	1	723771	PG_6	133781251	134505021
Sc0000819	1	723712	PG_6	134505172	135228883
Sc0000820	1	722944	PG_6	135229034	135951977
Sc0000821	1	722828	PG_6	135952128	136674955
Sc0000822	1	722632	PG_6	136675106	137397737
Sc0000823	1	722626	PG_6	137397888	138120513
Sc0000824	1	721106	PG_6	138120664	138841769
Sc0000825	1	720947	PG_6	138841920	139562866
Sc0000826	1	720394	PG_6	139563017	140283410
Sc0000827	1	720122	PG_6	140283561	141003682
Sc0000828	1	719962	PG_6	141003833	141723794
Sc0000829	1	719519	PG_6	141723945	142443463
xpSc0053220	1	719512	PG_6	142443614	143163125
Sc0000830	1	719354	PG_6	143163276	143882629
Sc0000831	1	718506	PG_6	143882780	144601285
Sc0000832	1	718257	PG_6	144601436	145319692
Sc0000833	1	718076	PG_6	145319843	146037918
Sc0000834	1	717849	PG_6	146038069	146755917
Sc0000835	1	717848	PG_6	146756068	147473915
Sc0000836	1	717755	PG_6	147474066	148191820
Sc0000837	1	717366	PG_6	148191971	148909336
Sc0000838	1	717292	PG_6	148909487	149626778
Sc0000839	1	717165	PG_6	149626929	150344093
Sc0000840	1	717113	PG_6	150344244	151061356
Sc0000841	1	715576	PG_6	151061507	151777082
Sc0000842	1	715551	PG_7	1	715551
Sc0000843	1	714960	PG_7	715702	1430661
Sc0000844	1	714788	PG_7	1430812	2145599
Sc0000845	1	714610	PG_7	2145750	2860359
Sc0000846	1	714521	PG_7	2860510	3575030
Sc0000847	1	713850	PG_7	3575181	4289030
Sc0000848	1	712805	PG_7	4289181	5001985
Sc0000849	1	712547	PG_7	5002136	5714682
Sc0000850	1	712432	PG_7	5714833	6427264
Sc0000851	1	712167	PG_7	6427415	7139581
Sc0000852	1	712164	PG_7	7139732	7851895
Sc0000853	1	711289	PG_7	7852046	8563334
Sc0000854	1	711259	PG_7	8563485	9274743
Sc0000855	1	710787	PG_7	9274894	9985680
Sc0000856	1	710392	PG_7	9985831	10696222
Sc0000857	1	710342	PG_7	10696373	11406714
Sc0000858	1	709975	PG_7	11406865	12116839
Sc0000859	1	709382	PG_7	12116990	12826371
Sc0000860	1	709320	PG_7	12826522	13535841
Sc0000861	1	708975	PG_7	13535992	14244966
Sc0000862	1	708835	PG_7	14245117	14953951
Sc0000863	1	708312	PG_7	14954102	15662413
Sc0000864	1	707937	PG_7	15662564	16370500
xpSc0053221	1	707867	PG_7	16370651	17078517
Sc0000865	1	707559	PG_7	17078668	17786226
Sc0000866	1	707361	PG_7	17786377	18493737
Sc0000867	1	707169	PG_7	18493888	19201056
Sc0000868	1	706910	PG_7	19201207	19908116
Sc0000869	1	706710	PG_7	19908267	20614976
Sc0000870	1	706638	PG_7	20615127	21321764
Sc0000871	1	706488	PG_7	21321915	22028402
Sc0000872	1	706361	PG_7	22028553	22734913
Sc0000874	1	703804	PG_7	22735064	23438867
Sc0000875	1	703666	PG_7	23439018	24142683
Sc0000876	1	703635	PG_7	24142834	24846468
Sc0000877	1	703302	PG_7	24846619	25549920
Sc0000878	1	703085	PG_7	25550071	26253155
Sc0000879	1	703069	PG_7	26253306	26956374
Sc0000880	1	702228	PG_7	26956525	27658752
Sc0000881	1	701438	PG_7	27658903	28360340
Sc0000882	1	700487	PG_7	28360491	29060977
Sc0000873	1	700044	PG_7	29061128	29761171
Sc0000883	1	699722	PG_7	29761322	30461043
Sc0000884	1	699646	PG_7	30461194	31160839
Sc0000885	1	699633	PG_7	31160990	31860622
Sc0000886	1	699574	PG_7	31860773	32560346
Sc0000887	1	699500	PG_7	32560497	33259996
Sc0000888	1	699388	PG_7	33260147	33959534
Sc0000889	1	698095	PG_7	33959685	34657779
Sc0000890	1	697846	PG_7	34657930	35355775
Sc0000891	1	697472	PG_7	35355926	36053397
Sc0000892	1	697453	PG_7	36053548	36751000
Sc0000893	1	697347	PG_7	36751151	37448497
Sc0000894	1	697247	PG_7	37448648	38145894
Sc0000895	1	697136	PG_7	38146045	38843180
Sc0000896	1	696895	PG_7	38843331	39540225
Sc0000897	1	696860	PG_7	39540376	40237235
Sc0000898	1	696855	PG_7	40237386	40934240
Sc0000899	1	696642	PG_7	40934391	41631032
Sc0000900	1	696592	PG_7	41631183	42327774
Sc0000901	1	696193	PG_7	42327925	43024117
Sc0000902	1	696079	PG_7	43024268	43720346
Sc0000903	1	695180	PG_7	43720497	44415676
Sc0000904	1	695163	PG_7	44415827	45110989
Sc0000905	1	694126	PG_7	45111140	45805265
Sc0000906	1	693888	PG_7	45805416	46499303
Sc0000907	1	693622	PG_7	46499454	47193075
Sc0000908	1	692858	PG_7	47193226	47886083
Sc0000909	1	692557	PG_7	47886234	48578790
Sc0000910	1	692333	PG_7	48578941	49271273
Sc0000911	1	691316	PG_7	49271424	49962739
Sc0000912	1	691271	PG_7	49962890	50654160
Sc0000913	1	691176	PG_7	50654311	51345486
Sc0000914	1	691131	PG_7	51345637	52036767
Sc0000915	1	690687	PG_7	52036918	52727604
Sc0000916	1	690207	PG_7	52727755	53417961
Sc0000917	1	689549	PG_7	53418112	54107660
Sc0000918	1	689405	PG_7	54107811	54797215
Sc0000919	1	689269	PG_7	54797366	55486634
Sc0000920	1	688160	PG_7	55486785	56174944
Sc0000921	1	688075	PG_7	56175095	56863169
Sc0000922	1	687610	PG_7	56863320	57550929
Sc0000923	1	687538	PG_7	57551080	58238617
Sc0000924	1	687509	PG_7	58238768	58926276
Sc0000925	1	687309	PG_7	58926427	59613735
Sc0000926	1	687081	PG_7	59613886	60300966
Sc0000927	1	686906	PG_7	60301117	60988022
Sc0000928	1	686248	PG_7	60988173	61674420
Sc0000929	1	686235	PG_7	61674571	62360805
Sc0000930	1	686154	PG_7	62360956	63047109
Sc0000931	1	685493	PG_7	63047260	63732752
Sc0000932	1	685269	PG_7	63732903	64418171
Sc0000933	1	685223	PG_7	64418322	65103544
Sc0000934	1	685121	PG_7	65103695	65788815
Sc0000935	1	684909	PG_7	65788966	66473874
Sc0000936	1	684087	PG_7	66474025	67158111
Sc0000937	1	683403	PG_7	67158262	67841664
Sc0000938	1	683315	PG_7	67841815	68525129
Sc0000939	1	681609	PG_7	68525280	69206888
Sc0000940	1	681161	PG_7	69207039	69888199
Sc0000941	1	680971	PG_7	69888350	70569320
Sc0000943	1	680523	PG_7	70569471	71249993
Sc0000944	1	680083	PG_7	71250144	71930226
Sc0000945	1	680070	PG_7	71930377	72610446
Sc0000942	1	679226	PG_7	72610597	73289822
Sc0000946	1	678621	PG_7	73289973	73968593
Sc0000947	1	678587	PG_7	73968744	74647330
Sc0000948	1	678126	PG_7	74647481	75325606
Sc0000949	1	677955	PG_7	75325757	76003711
Sc0000950	1	677699	PG_7	76003862	76681560
Sc0000951	1	677549	PG_7	76681711	77359259
Sc0000952	1	676653	PG_7	77359410	78036062
Sc0000953	1	676435	PG_7	78036213	78712647
Sc0000954	1	676091	PG_7	78712798	79388888
Sc0000955	1	675729	PG_7	79389039	80064767
Sc0000956	1	675587	PG_7	80064918	80740504
xfSc0000014	1	674655	PG_7	80740655	81415309
Sc0000957	1	674537	PG_7	81415460	82089996
Sc0000958	1	674487	PG_7	82090147	82764633
Sc0000959	1	674124	PG_7	82764784	83438907
Sc0000960	1	674105	PG_7	83439058	84113162
Sc0000961	1	673574	PG_7	84113313	84786886
Sc0000962	1	673272	PG_7	84787037	85460308
Sc0000963	1	672845	PG_7	85460459	86133303
Sc0000964	1	672360	PG_7	86133454	86805813
Sc0000965	1	672076	PG_7	86805964	87478039
Sc0000966	1	672013	PG_7	87478190	88150202
Sc0000967	1	671994	PG_7	88150353	88822346
Sc0000968	1	671747	PG_7	88822497	89494243
Sc0000969	1	671696	PG_7	89494394	90166089
Sc0000970	1	671636	PG_7	90166240	90837875
Sc0000971	1	671169	PG_7	90838026	91509194
Sc0000972	1	671134	PG_7	91509345	92180478
Sc0000973	1	671002	PG_7	92180629	92851630
Sc0000974	1	669831	PG_7	92851781	93521611
Sc0000975	1	669752	PG_7	93521762	94191513
Sc0000976	1	669473	PG_7	94191664	94861136
Sc0000977	1	669195	PG_7	94861287	95530481
Sc0000978	1	669008	PG_7	95530632	96199639
Sc0000979	1	668974	PG_7	96199790	96868763
Sc0000980	1	668881	PG_7	96868914	97537794
Sc0000981	1	667778	PG_7	97537945	98205722
Sc0000982	1	667436	PG_7	98205873	98873308
Sc0000983	1	667243	PG_7	98873459	99540701
Sc0000984	1	666303	PG_7	99540852	100207154
xpSc0053222	1	666235	PG_7	100207305	100873539
Sc0000985	1	665506	PG_7	100873690	101539195
Sc0000986	1	665474	PG_7	101539346	102204819
Sc0000987	1	665058	PG_7	102204970	102870027
Sc0000988	1	664793	PG_7	102870178	103534970
Sc0000989	1	664400	PG_7	103535121	104199520
Sc0000990	1	664057	PG_7	104199671	104863727
Sc0000991	1	663888	PG_7	104863878	105527765
Sc0000992	1	663595	PG_7	105527916	106191510
Sc0000993	1	662810	PG_7	106191661	106854470
Sc0000994	1	662616	PG_7	106854621	107517236
Sc0000995	1	662349	PG_7	107517387	108179735
Sc0000996	1	662002	PG_7	108179886	108841887
Sc0000997	1	660593	PG_7	108842038	109502630
Sc0000998	1	660035	PG_7	109502781	110162815
Sc0000999	1	659479	PG_7	110162966	110822444
Sc0001000	1	659089	PG_7	110822595	111481683
Sc0001001	1	658920	PG_7	111481834	112140753
Sc0001002	1	658674	PG_7	112140904	112799577
Sc0001003	1	657684	PG_7	112799728	113457411
Sc0001004	1	657670	PG_7	113457562	114115231
Sc0001005	1	657425	PG_7	114115382	114772806
Sc0001006	1	657408	PG_7	114772957	115430364
Sc0001007	1	654938	PG_7	115430515	116085452
Sc0001008	1	654663	PG_7	116085603	116740265
Sc0001009	1	654565	PG_7	116740416	117394980
Sc0001010	1	654534	PG_7	117395131	118049664
Sc0001011	1	654449	PG_7	118049815	118704263
Sc0001012	1	654446	PG_7	118704414	119358859
Sc0001013	1	653645	PG_7	119359010	120012654
Sc0001014	1	653342	PG_7	120012805	120666146
Sc0001015	1	653140	PG_7	120666297	121319436
Sc0001016	1	653061	PG_7	121319587	121972647
Sc0001017	1	652986	PG_7	121972798	122625783
Sc0001018	1	652967	PG_7	122625934	123278900
Sc0001019	1	652814	PG_7	123279051	123931864
Sc0001020	1	652751	PG_7	123932015	124584765
Sc0001021	1	651876	PG_7	124584916	125236791
Sc0001022	1	651682	PG_7	125236942	125888623
Sc0001023	1	651169	PG_7	125888774	126539942
Sc0001024	1	650482	PG_7	126540093	127190574
Sc0001025	1	649766	PG_7	127190725	127840490
Sc0001026	1	649525	PG_7	127840641	128490165
Sc0001027	1	649234	PG_7	128490316	129139549
Sc0001028	1	648650	PG_7	129139700	129788349
Sc0001029	1	648436	PG_7	129788500	130436935
Sc0001030	1	648232	PG_7	130437086	131085317
Sc0001031	1	648098	PG_7	131085468	131733565
Sc0001032	1	648049	PG_7	131733716	132381764
Sc0001033	1	647585	PG_7	132381915	133029499
Sc0001034	1	647367	PG_7	133029650	133677016
Sc0001035	1	646811	PG_7	133677167	134323977
Sc0001036	1	646555	PG_7	134324128	134970682
Sc0001037	1	646539	PG_7	134970833	135617371
Sc0001038	1	646506	PG_7	135617522	136264027
Sc0001039	1	646444	PG_7	136264178	136910621
Sc0001040	1	645576	PG_7	136910772	137556347
Sc0001041	1	645399	PG_7	137556498	138201896
Sc0001042	1	644439	PG_7	138202047	138846485
Sc0001043	1	644345	PG_7	138846636	139490980
Sc0001044	1	643689	PG_7	139491131	140134819
Sc0001045	1	643412	PG_7	140134970	140778381
Sc0001046	1	643082	PG_7	140778532	141421613
Sc0001047	1	642630	PG_7	141421764	142064393
Sc0001048	1	642415	PG_7	142064544	142706958
Sc0001049	1	642365	PG_7	142707109	143349473
Sc0001050	1	641862	PG_7	143349624	143991485
Sc0001051	1	641684	PG_7	143991636	144633319
Sc0001052	1	641439	PG_7	144633470	145274908
Sc0001053	1	641437	PG_7	145275059	145916495
Sc0001054	1	641259	PG_7	145916646	146557904
Sc0001055	1	640480	PG_7	146558055	147198534
Sc0001056	1	639544	PG_7	147198685	147838228
Sc0001057	1	639279	PG_7	147838379	148477657
Sc0001058	1	638826	PG_7	148477808	149116633
Sc0001059	1	638543	PG_7	149116784	149755326
Sc0001060	1	638343	PG_7	149755477	150393819
Sc0001061	1	638339	PG_7	150393970	151032308
Sc0001062	1	637910	PG_7	151032459	151670368
Sc0001063	1	637857	PG_8	1	637857
Sc0001064	1	637660	PG_8	638008	1275667
Sc0001065	1	636838	PG_8	1275818	1912655
Sc0001066	1	636442	PG_8	1912806	2549247
Sc0001067	1	636377	PG_8	2549398	3185774
Sc0001068	1	635934	PG_8	3185925	3821858
Sc0001069	1	635902	PG_8	3822009	4457910
Sc0001070	1	635259	PG_8	4458061	5093319
Sc0001071	1	635192	PG_8	5093470	5728661
Sc0001072	1	634571	PG_8	5728812	6363382
Sc0001073	1	634441	PG_8	6363533	6997973
Sc0001074	1	634103	PG_8	6998124	7632226
Sc0001075	1	633930	PG_8	7632377	8266306
Sc0001077	1	633639	PG_8	8266457	8900095
Sc0001078	1	633569	PG_8	8900246	9533814
Sc0001079	1	633387	PG_8	9533965	10167351
Sc0001080	1	632537	PG_8	10167502	10800038
Sc0001081	1	632505	PG_8	10800189	11432693
Sc0001082	1	632500	PG_8	11432844	12065343
Sc0001083	1	632089	PG_8	12065494	12697582
Sc0001084	1	632042	PG_8	12697733	13329774
Sc0001085	1	631417	PG_8	13329925	13961341
Sc0001076	1	631241	PG_8	13961492	14592732
Sc0001086	1	631042	PG_8	14592883	15223924
Sc0001087	1	630966	PG_8	15224075	15855040
Sc0001088	1	630720	PG_8	15855191	16485910
Sc0001089	1	630486	PG_8	16486061	17116546
Sc0001090	1	630230	PG_8	17116697	17746926
Sc0001091	1	629745	PG_8	17747077	18376821
Sc0001092	1	629707	PG_8	18376972	19006678
Sc0001093	1	629647	PG_8	19006829	19636475
Sc0001094	1	629415	PG_8	19636626	20266040
Sc0001095	1	629304	PG_8	20266191	20895494
Sc0001096	1	629101	PG_8	20895645	21524745
Sc0001097	1	628814	PG_8	21524896	22153709
Sc0001098	1	628549	PG_8	22153860	22782408
Sc0001099	1	628483	PG_8	22782559	23411041
Sc0001100	1	627074	PG_8	23411192	24038265
Sc0001101	1	627045	PG_8	24038416	24665460
Sc0001102	1	626865	PG_8	24665611	25292475
Sc0001103	1	626208	PG_8	25292626	25918833
Sc0001104	1	625769	PG_8	25918984	26544752
Sc0001105	1	625601	PG_8	26544903	27170503
Sc0001106	1	625593	PG_8	27170654	27796246
Sc0001107	1	625592	PG_8	27796397	28421988
Sc0001108	1	625573	PG_8	28422139	29047711
Sc0001109	1	625568	PG_8	29047862	29673429
xpSc0053223	1	625522	PG_8	29673580	30299101
Sc0001110	1	625441	PG_8	30299252	30924692
Sc0001111	1	625104	PG_8	30924843	31549946
Sc0001112	1	624728	PG_8	31550097	32174824
Sc0001113	1	622957	PG_8	32174975	32797931
Sc0001114	1	622330	PG_8	32798082	33420411
Sc0001115	1	621724	PG_8	33420562	34042285
Sc0001116	1	621484	PG_8	34042436	34663919
Sc0001117	1	621472	PG_8	34664070	35285541
Sc0001118	1	621272	PG_8	35285692	35906963
Sc0001119	1	621210	PG_8	35907114	36528323
Sc0001120	1	621108	PG_8	36528474	37149581
Sc0001121	1	621099	PG_8	37149732	37770830
Sc0001122	1	620837	PG_8	37770981	38391817
Sc0001123	1	620393	PG_8	38391968	39012360
Sc0001124	1	619863	PG_8	39012511	39632373
Sc0001125	1	619763	PG_8	39632524	40252286
Sc0001126	1	619759	PG_8	40252437	40872195
Sc0001127	1	619077	PG_8	40872346	41491422
Sc0001128	1	619027	PG_8	41491573	42110599
xpSc0053224	1	618371	PG_8	42110750	42729120
Sc0001129	1	618315	PG_8	42729271	43347585
Sc0001130	1	617756	PG_8	43347736	43965491
Sc0001131	1	616673	PG_8	43965642	44582314
Sc0001132	1	616444	PG_8	44582465	45198908
Sc0001133	1	615998	PG_8	45199059	45815056
Sc0001134	1	615856	PG_8	45815207	46431062
Sc0001135	1	615291	PG_8	46431213	47046503
Sc0001136	1	615194	PG_8	47046654	47661847
Sc0001137	1	615015	PG_8	47661998	48277012
Sc0001138	1	614896	PG_8	48277163	48892058
Sc0001139	1	614691	PG_8	48892209	49506899
Sc0001140	1	614594	PG_8	49507050	50121643
Sc0001141	1	614542	PG_8	50121794	50736335
Sc0001142	1	614495	PG_8	50736486	51350980
Sc0001143	1	614352	PG_8	51351131	51965482
Sc0001144	1	613865	PG_8	51965633	52579497
Sc0001145	1	612804	PG_8	52579648	53192451
xpSc0053225	1	612685	PG_8	53192602	53805286
Sc0001146	1	612607	PG_8	53805437	54418043
Sc0001147	1	612596	PG_8	54418194	55030789
Sc0001148	1	612439	PG_8	55030940	55643378
Sc0001149	1	612337	PG_8	55643529	56255865
Sc0001150	1	612236	PG_8	56256016	56868251
Sc0001151	1	611983	PG_8	56868402	57480384
Sc0001152	1	611966	PG_8	57480535	58092500
Sc0001153	1	611772	PG_8	58092651	58704422
Sc0001154	1	611106	PG_8	58704573	59315678
Sc0001155	1	610946	PG_8	59315829	59926774
Sc0001156	1	610796	PG_8	59926925	60537720
xpSc0053226	1	610267	PG_8	60537871	61148137
Sc0001157	1	610172	PG_8	61148288	61758459
Sc0001158	1	610101	PG_8	61758610	62368710
Sc0001159	1	609866	PG_8	62368861	62978726
Sc0001160	1	609817	PG_8	62978877	63588693
xfSc0000015	1	609680	PG_8	63588844	64198523
Sc0001161	1	609528	PG_8	64198674	64808201
Sc0001162	1	609392	PG_8	64808352	65417743
Sc0001163	1	609136	PG_8	65417894	66027029
Sc0001165	1	608339	PG_8	66027180	66635518
Sc0001166	1	608257	PG_8	66635669	67243925
Sc0001164	1	608210	PG_8	67244076	67852285
Sc0001167	1	607959	PG_8	67852436	68460394
Sc0001169	1	607864	PG_8	68460545	69068408
Sc0001168	1	607864	PG_8	69068559	69676422
Sc0001170	1	607637	PG_8	69676573	70284209
Sc0001171	1	606834	PG_8	70284360	70891193
Sc0001172	1	606024	PG_8	70891344	71497367
Sc0001173	1	606004	PG_8	71497518	72103521
xfSc0000016	1	605874	PG_8	72103672	72709545
Sc0001174	1	605703	PG_8	72709696	73315398
Sc0001175	1	605692	PG_8	73315549	73921240
Sc0001176	1	605328	PG_8	73921391	74526718
Sc0001177	1	605184	PG_8	74526869	75132052
Sc0001178	1	605005	PG_8	75132203	75737207
Sc0001179	1	604887	PG_8	75737358	76342244
Sc0001180	1	604863	PG_8	76342395	76947257
Sc0001181	1	604528	PG_8	76947408	77551935
Sc0001182	1	604189	PG_8	77552086	78156274
xfSc0000017	1	603953	PG_8	78156425	78760377
Sc0001183	1	603615	PG_8	78760528	79364142
xfSc0000018	1	603485	PG_8	79364293	79967777
xpSc0053227	1	603332	PG_8	79967928	80571259
Sc0001184	1	602926	PG_8	80571410	81174335
Sc0001185	1	602742	PG_8	81174486	81777227
Sc0001186	1	602555	PG_8	81777378	82379932
Sc0001187	1	602528	PG_8	82380083	82982610
Sc0001188	1	602474	PG_8	82982761	83585234
xpSc0053228	1	601854	PG_8	83585385	84187238
Sc0001189	1	601815	PG_8	84187389	84789203
Sc0001190	1	601698	PG_8	84789354	85391051
Sc0001191	1	601413	PG_8	85391202	85992614
Sc0001192	1	601364	PG_8	85992765	86594128
Sc0001193	1	600985	PG_8	86594279	87195263
Sc0001194	1	600947	PG_8	87195414	87796360
Sc0001195	1	600848	PG_8	87796511	88397358
Sc0001196	1	600761	PG_8	88397509	88998269
Sc0001197	1	600191	PG_8	88998420	89598610
Sc0001198	1	600164	PG_8	89598761	90198924
Sc0001199	1	600141	PG_8	90199075	90799215
Sc0001200	1	599850	PG_8	90799366	91399215
Sc0001201	1	599754	PG_8	91399366	91999119
xfSc0000019	1	599709	PG_8	91999270	92598978
Sc0001202	1	599447	PG_8	92599129	93198575
Sc0001203	1	599279	PG_8	93198726	93798004
Sc0001204	1	599256	PG_8	93798155	94397410
Sc0001205	1	598915	PG_8	94397561	94996475
Sc0001206	1	598875	PG_8	94996626	95595500
Sc0001207	1	598463	PG_8	95595651	96194113
Sc0001208	1	598059	PG_8	96194264	96792322
Sc0001209	1	597413	PG_8	96792473	97389885
Sc0001210	1	597396	PG_8	97390036	97987431
Sc0001211	1	597122	PG_8	97987582	98584703
xfSc0000020	1	597088	PG_8	98584854	99181941
Sc0001212	1	596325	PG_8	99182092	99778416
xfSc0000021	1	596147	PG_8	99778567	100374713
Sc0001213	1	596124	PG_8	100374864	100970987
Sc0001214	1	596043	PG_8	100971138	101567180
Sc0001215	1	595842	PG_8	101567331	102163172
Sc0001216	1	595769	PG_8	102163323	102759091
Sc0001217	1	595592	PG_8	102759242	103354833
Sc0001218	1	594933	PG_8	103354984	103949916
Sc0001219	1	594544	PG_8	103950067	104544610
Sc0001220	1	594532	PG_8	104544761	105139292
Sc0001221	1	594318	PG_8	105139443	105733760
Sc0001222	1	594159	PG_8	105733911	106328069
Sc0001223	1	594024	PG_8	106328220	106922243
Sc0001224	1	594011	PG_8	106922394	107516404
xfSc0000022	1	593848	PG_8	107516555	108110402
Sc0001225	1	593807	PG_8	108110553	108704359
Sc0001226	1	593645	PG_8	108704510	109298154
Sc0001227	1	592600	PG_8	109298305	109890904
Sc0001228	1	592525	PG_8	109891055	110483579
Sc0001229	1	592237	PG_8	110483730	111075966
xfSc0000023	1	591543	PG_8	111076117	111667659
xfSc0000024	1	591238	PG_8	111667810	112259047
Sc0001230	1	591132	PG_8	112259198	112850329
Sc0001231	1	590877	PG_8	112850480	113441356
Sc0001232	1	590796	PG_8	113441507	114032302
Sc0001233	1	590642	PG_8	114032453	114623094
Sc0001234	1	590631	PG_8	114623245	115213875
Sc0001235	1	590544	PG_8	115214026	115804569
Sc0001236	1	590491	PG_8	115804720	116395210
Sc0001237	1	590245	PG_8	116395361	116985605
Sc0001238	1	589373	PG_8	116985756	117575128
Sc0001239	1	589365	PG_8	117575279	118164643
Sc0001240	1	588956	PG_8	118164794	118753749
xpSc0053229	1	588477	PG_8	118753900	119342376
Sc0001241	1	588272	PG_8	119342527	119930798
Sc0001242	1	588004	PG_8	119930949	120518952
Sc0001243	1	587990	PG_8	120519103	121107092
Sc0001244	1	587879	PG_8	121107243	121695121
Sc0001245	1	587807	PG_8	121695272	122283078
xfSc0000025	1	587799	PG_8	122283229	122871027
xfSc0000026	1	587124	PG_8	122871178	123458301
Sc0001246	1	587063	PG_8	123458452	124045514
Sc0001247	1	586858	PG_8	124045665	124632522
Sc0001248	1	585817	PG_8	124632673	125218489
Sc0001249	1	585515	PG_8	125218640	125804154
Sc0001250	1	584518	PG_8	125804305	126388822
Sc0001251	1	584098	PG_8	126388973	126973070
Sc0001252	1	583866	PG_8	126973221	127557086
xpSc0053230	1	583522	PG_8	127557237	128140758
Sc0001253	1	581985	PG_8	128140909	128722893
Sc0001254	1	581826	PG_8	128723044	129304869
Sc0001255	1	581743	PG_8	129305020	129886762
Sc0001256	1	581320	PG_8	129886913	130468232
Sc0001257	1	580945	PG_8	130468383	131049327
Sc0001258	1	580539	PG_8	131049478	131630016
xpSc0053231	1	580312	PG_8	131630167	132210478
Sc0001259	1	579183	PG_8	132210629	132789811
Sc0001260	1	579061	PG_8	132789962	133369022
Sc0001261	1	578839	PG_8	133369173	133948011
Sc0001262	1	578834	PG_8	133948162	134526995
Sc0001263	1	578431	PG_8	134527146	135105576
Sc0001264	1	577949	PG_8	135105727	135683675
Sc0001265	1	577526	PG_8	135683826	136261351
Sc0001266	1	576945	PG_8	136261502	136838446
Sc0001267	1	576760	PG_8	136838597	137415356
xfSc0000027	1	575967	PG_8	137415507	137991473
Sc0001268	1	575778	PG_8	137991624	138567401
Sc0001269	1	575599	PG_8	138567552	139143150
Sc0001270	1	575443	PG_8	139143301	139718743
Sc0001271	1	575372	PG_8	139718894	140294265
Sc0001272	1	575058	PG_8	140294416	140869473
Sc0001273	1	574951	PG_8	140869624	141444574
Sc0001274	1	574942	PG_8	141444725	142019666
Sc0001275	1	574498	PG_8	142019817	142594314
Sc0001276	1	573526	PG_8	142594465	143167990
Sc0001277	1	573401	PG_8	143168141	143741541
xfSc0000028	1	573379	PG_8	143741692	144315070
Sc0001278	1	573123	PG_8	144315221	144888343
Sc0001279	1	572952	PG_8	144888494	145461445
Sc0001280	1	572536	PG_8	145461596	146034131
Sc0001281	1	572324	PG_8	146034282	146606605
Sc0001282	1	572100	PG_8	146606756	147178855
Sc0001283	1	571899	PG_8	147179006	147750904
xpSc0053232	1	571740	PG_8	147751055	148322794
Sc0001284	1	571264	PG_8	148322945	148894208
Sc0001285	1	570856	PG_8	148894359	149465214
Sc0001286	1	570701	PG_8	149465365	150036065
Sc0001287	1	570337	PG_8	150036216	150606552
Sc0001288	1	569386	PG_8	150606703	151176088
xpSc0053233	1	569242	PG_8	151176239	151745480
Sc0001289	1	569093	PG_9	1	569093
Sc0001290	1	568896	PG_9	569244	1138139
Sc0001291	1	568666	PG_9	1138290	1706955
Sc0001292	1	568112	PG_9	1707106	2275217
Sc0001293	1	567682	PG_9	2275368	2843049
xpSc0053234	1	567648	PG_9	2843200	3410847
xfSc0000029	1	567386	PG_9	3410998	3978383
Sc0001294	1	567169	PG_9	3978534	4545702
Sc0001295	1	565896	PG_9	4545853	5111748
Sc0001296	1	565597	PG_9	5111899	5677495
Sc0001298	1	565161	PG_9	5677646	6242806
Sc0001297	1	565161	PG_9	6242957	6808117
Sc0001299	1	564554	PG_9	6808268	7372821
Sc0001300	1	564307	PG_9	7372972	7937278
Sc0001301	1	563810	PG_9	7937429	8501238
Sc0001302	1	563696	PG_9	8501389	9065084
Sc0001303	1	563551	PG_9	9065235	9628785
Sc0001304	1	563254	PG_9	9628936	10192189
Sc0001305	1	562928	PG_9	10192340	10755267
Sc0001306	1	562781	PG_9	10755418	11318198
Sc0001307	1	562701	PG_9	11318349	11881049
xfSc0000030	1	562313	PG_9	11881200	12443512
Sc0001308	1	561890	PG_9	12443663	13005552
xfSc0000031	1	561759	PG_9	13005703	13567461
xfSc0000032	1	561088	PG_9	13567612	14128699
Sc0001309	1	560748	PG_9	14128850	14689597
Sc0001310	1	560559	PG_9	14689748	15250306
Sc0001311	1	560194	PG_9	15250457	15810650
xpSc0053235	1	560094	PG_9	15810801	16370894
Sc0001312	1	560001	PG_9	16371045	16931045
Sc0001313	1	559924	PG_9	16931196	17491119
Sc0001314	1	559405	PG_9	17491270	18050674
Sc0001315	1	559377	PG_9	18050825	18610201
Sc0001316	1	559264	PG_9	18610352	19169615
Sc0001317	1	559230	PG_9	19169766	19728995
Sc0001318	1	558949	PG_9	19729146	20288094
Sc0001319	1	558866	PG_9	20288245	20847110
Sc0001320	1	558108	PG_9	20847261	21405368
Sc0001321	1	557983	PG_9	21405519	21963501
Sc0001322	1	557629	PG_9	21963652	22521280
Sc0001323	1	557246	PG_9	22521431	23078676
Sc0001324	1	557134	PG_9	23078827	23635960
Sc0001325	1	556805	PG_9	23636111	24192915
Sc0001326	1	556699	PG_9	24193066	24749764
Sc0001327	1	556510	PG_9	24749915	25306424
Sc0001328	1	556307	PG_9	25306575	25862881
Sc0001329	1	555751	PG_9	25863032	26418782
Sc0001330	1	555728	PG_9	26418933	26974660
Sc0001331	1	555146	PG_9	26974811	27529956
Sc0001332	1	555071	PG_9	27530107	28085177
Sc0001333	1	554576	PG_9	28085328	28639903
xpSc0053236	1	553529	PG_9	28640054	29193582
Sc0001334	1	553528	PG_9	29193733	29747260
Sc0001335	1	552996	PG_9	29747411	30300406
Sc0001336	1	552844	PG_9	30300557	30853400
Sc0001337	1	552823	PG_9	30853551	31406373
Sc0001339	1	552087	PG_9	31406524	31958610
Sc0001340	1	552005	PG_9	31958761	32510765
Sc0001341	1	551939	PG_9	32510916	33062854
Sc0001342	1	551300	PG_9	33063005	33614304
Sc0001343	1	551256	PG_9	33614455	34165710
Sc0001344	1	551087	PG_9	34165861	34716947
Sc0001345	1	550988	PG_9	34717098	35268085
Sc0001346	1	550641	PG_9	35268236	35818876
Sc0001347	1	550363	PG_9	35819027	36369389
xfSc0000033	1	550302	PG_9	36369540	36919841
Sc0001348	1	550226	PG_9	36919992	37470217
Sc0001349	1	549953	PG_9	37470368	38020320
Sc0001350	1	549885	PG_9	38020471	38570355
Sc0001351	1	549663	PG_9	38570506	39120168
Sc0001352	1	549596	PG_9	39120319	39669914
Sc0001353	1	549590	PG_9	39670065	40219654
xfSc0000034	1	549551	PG_9	40219805	40769355
xpSc0053237	1	549228	PG_9	40769506	41318733
Sc0001354	1	549084	PG_9	41318884	41867967
Sc0001355	1	548975	PG_9	41868118	42417092
Sc0001356	1	548829	PG_9	42417243	42966071
xfSc0000035	1	548722	PG_9	42966222	43514943
Sc0001338	1	548664	PG_9	43515094	44063757
Sc0001357	1	548562	PG_9	44063908	44612469
Sc0001358	1	548441	PG_9	44612620	45161060
xfSc0000036	1	548113	PG_9	45161211	45709323
Sc0001359	1	547680	PG_9	45709474	46257153
Sc0001360	1	547427	PG_9	46257304	46804730
Sc0001361	1	547245	PG_9	46804881	47352125
Sc0001362	1	547138	PG_9	47352276	47899413
Sc0001363	1	546486	PG_9	47899564	48446049
Sc0001364	1	546195	PG_9	48446200	48992394
Sc0001365	1	545754	PG_9	48992545	49538298
Sc0001366	1	545752	PG_9	49538449	50084200
Sc0001367	1	545722	PG_9	50084351	50630072
Sc0001368	1	545705	PG_9	50630223	51175927
Sc0001369	1	545678	PG_9	51176078	51721755
xpSc0053238	1	545273	PG_9	51721906	52267178
Sc0001370	1	545056	PG_9	52267329	52812384
Sc0001371	1	545032	PG_9	52812535	53357566
Sc0001372	1	544790	PG_9	53357717	53902506
Sc0001373	1	544489	PG_9	53902657	54447145
Sc0001374	1	544127	PG_9	54447296	54991422
Sc0001375	1	543970	PG_9	54991573	55535542
Sc0001376	1	543494	PG_9	55535693	56079186
Sc0001377	1	543346	PG_9	56079337	56622682
Sc0001378	1	543344	PG_9	56622833	57166176
Sc0001379	1	543260	PG_9	57166327	57709586
xpSc0053239	1	543067	PG_9	57709737	58252803
Sc0001380	1	542988	PG_9	58252954	58795941
xpSc0053240	1	542477	PG_9	58796092	59338568
Sc0001381	1	541732	PG_9	59338719	59880450
Sc0001383	1	541354	PG_9	59880601	60421954
Sc0001382	1	541354	PG_9	60422105	60963458
Sc0001384	1	541264	PG_9	60963609	61504872
xfSc0000037	1	540795	PG_9	61505023	62045817
Sc0001385	1	540282	PG_9	62045968	62586249
Sc0001386	1	540270	PG_9	62586400	63126669
Sc0001388	1	540142	PG_9	63126820	63666961
Sc0001387	1	540141	PG_9	63667112	64207252
Sc0001389	1	540037	PG_9	64207403	64747439
Sc0001390	1	540023	PG_9	64747590	65287612
xfSc0000038	1	539848	PG_9	65287763	65827610
xpSc0053241	1	539677	PG_9	65827761	66367437
Sc0001391	1	539405	PG_9	66367588	66906992
Sc0001392	1	538675	PG_9	66907143	67445817
Sc0001393	1	538640	PG_9	67445968	67984607
Sc0001394	1	537972	PG_9	67984758	68522729
Sc0001395	1	537596	PG_9	68522880	69060475
Sc0001397	1	537501	PG_9	69060626	69598126
Sc0001398	1	537464	PG_9	69598277	70135740
Sc0001399	1	537455	PG_9	70135891	70673345
xpSc0053242	1	537412	PG_9	70673496	71210907
Sc0001400	1	537340	PG_9	71211058	71748397
Sc0001401	1	537323	PG_9	71748548	72285870
Sc0001402	1	537290	PG_9	72286021	72823310
Sc0001403	1	537061	PG_9	72823461	73360521
Sc0001404	1	536948	PG_9	73360672	73897619
Sc0001405	1	536785	PG_9	73897770	74434554
Sc0001406	1	536680	PG_9	74434705	74971384
Sc0001407	1	536612	PG_9	74971535	75508146
Sc0001408	1	536067	PG_9	75508297	76044363
Sc0001396	1	535997	PG_9	76044514	76580510
Sc0001409	1	535478	PG_9	76580661	77116138
Sc0001410	1	535302	PG_9	77116289	77651590
Sc0001411	1	535288	PG_9	77651741	78187028
xfSc0000039	1	534717	PG_9	78187179	78721895
Sc0001413	1	533837	PG_9	78722046	79255882
Sc0001412	1	533676	PG_9	79256033	79789708
Sc0001414	1	533602	PG_9	79789859	80323460
Sc0001415	1	533156	PG_9	80323611	80856766
Sc0001416	1	533123	PG_9	80856917	81390039
xpSc0053243	1	533083	PG_9	81390190	81923272
xfSc0000040	1	532972	PG_9	81923423	82456394
Sc0001417	1	532063	PG_9	82456545	82988607
Sc0001418	1	531903	PG_9	82988758	83520660
Sc0001419	1	531835	PG_9	83520811	84052645
Sc0001420	1	531450	PG_9	84052796	84584245
Sc0001421	1	531392	PG_9	84584396	85115787
Sc0001422	1	531379	PG_9	85115938	85647316
Sc0001423	1	531140	PG_9	85647467	86178606
Sc0001424	1	531090	PG_9	86178757	86709846
xpSc0053244	1	530397	PG_9	86709997	87240393
Sc0001425	1	530386	PG_9	87240544	87770929
Sc0001426	1	530374	PG_9	87771080	88301453
Sc0001427	1	530304	PG_9	88301604	88831907
Sc0001428	1	530161	PG_9	88832058	89362218
Sc0001429	1	529523	PG_9	89362369	89891891
Sc0001430	1	529401	PG_9	89892042	90421442
Sc0001431	1	529329	PG_9	90421593	90950921
Sc0001432	1	529188	PG_9	90951072	91480259
Sc0001433	1	529070	PG_9	91480410	92009479
Sc0001434	1	528075	PG_9	92009630	92537704
xpSc0053245	1	527863	PG_9	92537855	93065717
Sc0001435	1	527831	PG_9	93065868	93593698
Sc0001436	1	527482	PG_9	93593849	94121330
Sc0001437	1	527476	PG_9	94121481	94648956
Sc0001438	1	527457	PG_9	94649107	95176563
Sc0001439	1	527389	PG_9	95176714	95704102
Sc0001440	1	527291	PG_9	95704253	96231543
Sc0001441	1	527238	PG_9	96231694	96758931
Sc0001442	1	527056	PG_9	96759082	97286137
Sc0001443	1	526917	PG_9	97286288	97813204
xpSc0053246	1	526782	PG_9	97813355	98340136
xfSc0000041	1	526570	PG_9	98340287	98866856
Sc0001444	1	526162	PG_9	98867007	99393168
Sc0001445	1	525795	PG_9	99393319	99919113
xpSc0053247	1	525789	PG_9	99919264	100445052
Sc0001446	1	525452	PG_9	100445203	100970654
Sc0001447	1	524926	PG_9	100970805	101495730
Sc0001448	1	524782	PG_9	101495881	102020662
Sc0001449	1	524724	PG_9	102020813	102545536
Sc0001450	1	524369	PG_9	102545687	103070055
Sc0001451	1	524355	PG_9	103070206	103594560
xpSc0053248	1	524160	PG_9	103594711	104118870
Sc0001452	1	524154	PG_9	104119021	104643174
Sc0001453	1	524048	PG_9	104643325	105167372
Sc0001454	1	523938	PG_9	105167523	105691460
Sc0001455	1	523721	PG_9	105691611	106215331
xpSc0053249	1	523583	PG_9	106215482	106739064
Sc0001456	1	523250	PG_9	106739215	107262464
Sc0001457	1	523204	PG_9	107262615	107785818
Sc0001458	1	523137	PG_9	107785969	108309105
Sc0001459	1	523024	PG_9	108309256	108832279
Sc0001460	1	523012	PG_9	108832430	109355441
Sc0001461	1	522696	PG_9	109355592	109878287
Sc0001462	1	522558	PG_9	109878438	110400995
Sc0001463	1	522528	PG_9	110401146	110923673
Sc0001464	1	522511	PG_9	110923824	111446334
Sc0001465	1	521865	PG_9	111446485	111968349
Sc0001466	1	521807	PG_9	111968500	112490306
Sc0001467	1	521027	PG_9	112490457	113011483
Sc0001468	1	520314	PG_9	113011634	113531947
Sc0001469	1	520094	PG_9	113532098	114052191
Sc0001470	1	520083	PG_9	114052342	114572424
Sc0001471	1	520001	PG_9	114572575	115092575
Sc0001472	1	519950	PG_9	115092726	115612675
Sc0001473	1	519693	PG_9	115612826	116132518
Sc0001474	1	519407	PG_9	116132669	116652075
Sc0001475	1	518981	PG_9	116652226	117171206
Sc0001476	1	518973	PG_9	117171357	117690329
Sc0001477	1	518840	PG_9	117690480	118209319
Sc0001478	1	518673	PG_9	118209470	118728142
Sc0001479	1	517996	PG_9	118728293	119246288
Sc0001480	1	517990	PG_9	119246439	119764428
Sc0001481	1	517633	PG_9	119764579	120282211
Sc0001483	1	517184	PG_9	120282362	120799545
Sc0001484	1	516916	PG_9	120799696	121316611
xpSc0053251	1	516824	PG_9	121316762	121833585
Sc0001485	1	516784	PG_9	121833736	122350519
Sc0001486	1	516388	PG_9	122350670	122867057
xpSc0053252	1	516355	PG_9	122867208	123383562
Sc0001487	1	516212	PG_9	123383713	123899924
Sc0001488	1	516159	PG_9	123900075	124416233
xpSc0053250	1	516029	PG_9	124416384	124932412
Sc0001489	1	515702	PG_9	124932563	125448264
Sc0001490	1	515445	PG_9	125448415	125963859
xfSc0000042	1	515289	PG_9	125964010	126479298
Sc0001482	1	515233	PG_9	126479449	126994681
Sc0001491	1	515215	PG_9	126994832	127510046
Sc0001492	1	514991	PG_9	127510197	128025187
Sc0001493	1	514607	PG_9	128025338	128539944
Sc0001494	1	514176	PG_9	128540095	129054270
Sc0001495	1	513476	PG_9	129054421	129567896
Sc0001496	1	512959	PG_9	129568047	130081005
Sc0001497	1	512186	PG_9	130081156	130593341
Sc0001498	1	512111	PG_9	130593492	131105602
Sc0001499	1	512105	PG_9	131105753	131617857
Sc0001500	1	511968	PG_9	131618008	132129975
Sc0001501	1	511896	PG_9	132130126	132642021
Sc0001502	1	511691	PG_9	132642172	133153862
Sc0001503	1	511687	PG_9	133154013	133665699
Sc0001504	1	511104	PG_9	133665850	134176953
Sc0001505	1	510976	PG_9	134177104	134688079
Sc0001506	1	510675	PG_9	134688230	135198904
Sc0001507	1	510601	PG_9	135199055	135709655
Sc0001508	1	510252	PG_9	135709806	136220057
Sc0001509	1	509885	PG_9	136220208	136730092
Sc0001510	1	509787	PG_9	136730243	137240029
Sc0001511	1	509514	PG_9	137240180	137749693
Sc0001512	1	509438	PG_9	137749844	138259281
Sc0001513	1	509421	PG_9	138259432	138768852
Sc0001514	1	509225	PG_9	138769003	139278227
Sc0001515	1	509195	PG_9	139278378	139787572
Sc0001516	1	509073	PG_9	139787723	140296795
Sc0001517	1	508876	PG_9	140296946	140805821
Sc0001518	1	508818	PG_9	140805972	141314789
Sc0001519	1	508787	PG_9	141314940	141823726
Sc0001520	1	508785	PG_9	141823877	142332661
Sc0001521	1	508697	PG_9	142332812	142841508
Sc0001522	1	508044	PG_9	142841659	143349702
Sc0001523	1	507975	PG_9	143349853	143857827
Sc0001524	1	507841	PG_9	143857978	144365818
Sc0001525	1	507818	PG_9	144365969	144873786
Sc0001526	1	507688	PG_9	144873937	145381624
Sc0001527	1	507683	PG_9	145381775	145889457
Sc0001528	1	507434	PG_9	145889608	146397041
Sc0001529	1	507394	PG_9	146397192	146904585
Sc0001530	1	507123	PG_9	146904736	147411858
Sc0001531	1	506751	PG_9	147412009	147918759
Sc0001532	1	506739	PG_9	147918910	148425648
xfSc0000043	1	506717	PG_9	148425799	148932515
Sc0001533	1	506647	PG_9	148932666	149439312
Sc0001534	1	506427	PG_9	149439463	149945889
Sc0001535	1	505741	PG_9	149946040	150451780
Sc0001536	1	505713	PG_9	150451931	150957643
Sc0001537	1	505638	PG_9	150957794	151463431
Sc0001538	1	505465	PG_10	1	505465
Sc0001539	1	505411	PG_10	505616	1011026
Sc0001540	1	505332	PG_10	1011177	1516508
Sc0001541	1	505140	PG_10	1516659	2021798
Sc0001542	1	505048	PG_10	2021949	2526996
Sc0001543	1	505018	PG_10	2527147	3032164
Sc0001544	1	504985	PG_10	3032315	3537299
Sc0001545	1	504591	PG_10	3537450	4042040
Sc0001546	1	504316	PG_10	4042191	4546506
Sc0001547	1	504259	PG_10	4546657	5050915
Sc0001548	1	504156	PG_10	5051066	5555221
Sc0001549	1	504125	PG_10	5555372	6059496
Sc0001550	1	503877	PG_10	6059647	6563523
Sc0001551	1	503806	PG_10	6563674	7067479
Sc0001552	1	503322	PG_10	7067630	7570951
Sc0001553	1	503313	PG_10	7571102	8074414
Sc0001554	1	503227	PG_10	8074565	8577791
Sc0001555	1	503225	PG_10	8577942	9081166
Sc0001556	1	502756	PG_10	9081317	9584072
Sc0001557	1	502586	PG_10	9584223	10086808
Sc0001558	1	502578	PG_10	10086959	10589536
Sc0001559	1	502305	PG_10	10589687	11091991
Sc0001560	1	502031	PG_10	11092142	11594172
xfSc0000044	1	501782	PG_10	11594323	12096104
Sc0001561	1	501469	PG_10	12096255	12597723
Sc0001562	1	501425	PG_10	12597874	13099298
Sc0001563	1	501307	PG_10	13099449	13600755
Sc0001564	1	500963	PG_10	13600906	14101868
Sc0001565	1	500337	PG_10	14102019	14602355
Sc0001566	1	500261	PG_10	14602506	15102766
Sc0001567	1	499951	PG_10	15102917	15602867
Sc0001568	1	499821	PG_10	15603018	16102838
Sc0001569	1	499814	PG_10	16102989	16602802
xfSc0000045	1	499786	PG_10	16602953	17102738
Sc0001570	1	499678	PG_10	17102889	17602566
Sc0001571	1	498793	PG_10	17602717	18101509
Sc0001572	1	498648	PG_10	18101660	18600307
Sc0001573	1	498445	PG_10	18600458	19098902
Sc0001574	1	498246	PG_10	19099053	19597298
Sc0001575	1	498088	PG_10	19597449	20095536
Sc0001576	1	497532	PG_10	20095687	20593218
Sc0001577	1	497288	PG_10	20593369	21090656
Sc0001578	1	497217	PG_10	21090807	21588023
Sc0001579	1	497158	PG_10	21588174	22085331
Sc0001580	1	496971	PG_10	22085482	22582452
Sc0001581	1	496739	PG_10	22582603	23079341
Sc0001582	1	496433	PG_10	23079492	23575924
Sc0001583	1	496419	PG_10	23576075	24072493
Sc0001584	1	496383	PG_10	24072644	24569026
Sc0001585	1	496199	PG_10	24569177	25065375
xfSc0000046	1	495984	PG_10	25065526	25561509
Sc0001586	1	495828	PG_10	25561660	26057487
Sc0001587	1	495803	PG_10	26057638	26553440
Sc0001588	1	495568	PG_10	26553591	27049158
Sc0001589	1	495259	PG_10	27049309	27544567
Sc0001590	1	495151	PG_10	27544718	28039868
Sc0001591	1	494736	PG_10	28040019	28534754
Sc0001592	1	494571	PG_10	28534905	29029475
Sc0001593	1	494557	PG_10	29029626	29524182
Sc0001594	1	494202	PG_10	29524333	30018534
Sc0001595	1	494088	PG_10	30018685	30512772
Sc0001596	1	493928	PG_10	30512923	31006850
Sc0001597	1	493345	PG_10	31007001	31500345
Sc0001598	1	493284	PG_10	31500496	31993779
Sc0001599	1	492857	PG_10	31993930	32486786
Sc0001600	1	492741	PG_10	32486937	32979677
xpSc0053253	1	492684	PG_10	32979828	33472511
xpSc0053254	1	492637	PG_10	33472662	33965298
Sc0001601	1	492597	PG_10	33965449	34458045
Sc0001602	1	492496	PG_10	34458196	34950691
Sc0001603	1	492469	PG_10	34950842	35443310
Sc0001604	1	492437	PG_10	35443461	35935897
Sc0001605	1	491937	PG_10	35936048	36427984
Sc0001606	1	491610	PG_10	36428135	36919744
Sc0001607	1	491463	PG_10	36919895	37411357
Sc0001608	1	491323	PG_10	37411508	37902830
Sc0001609	1	491258	PG_10	37902981	38394238
Sc0001610	1	491120	PG_10	38394389	38885508
Sc0001611	1	490963	PG_10	38885659	39376621
Sc0001612	1	490689	PG_10	39376772	39867460
Sc0001613	1	490299	PG_10	39867611	40357909
Sc0001614	1	490040	PG_10	40358060	40848099
Sc0001615	1	489929	PG_10	40848250	41338178
Sc0001616	1	489918	PG_10	41338329	41828246
Sc0001617	1	489031	PG_10	41828397	42317427
Sc0001618	1	488796	PG_10	42317578	42806373
Sc0001619	1	488774	PG_10	42806524	43295297
Sc0001620	1	488625	PG_10	43295448	43784072
Sc0001621	1	487931	PG_10	43784223	44272153
Sc0001622	1	487833	PG_10	44272304	44760136
Sc0001623	1	487753	PG_10	44760287	45248039
Sc0001624	1	487674	PG_10	45248190	45735863
Sc0001625	1	487269	PG_10	45736014	46223282
xpSc0053255	1	487074	PG_10	46223433	46710506
Sc0001626	1	486501	PG_10	46710657	47197157
Sc0001627	1	486482	PG_10	47197308	47683789
Sc0001628	1	486418	PG_10	47683940	48170357
Sc0001629	1	485848	PG_10	48170508	48656355
Sc0001630	1	485741	PG_10	48656506	49142246
Sc0001631	1	485726	PG_10	49142397	49628122
Sc0001632	1	485295	PG_10	49628273	50113567
Sc0001633	1	485215	PG_10	50113718	50598932
Sc0001634	1	485105	PG_10	50599083	51084187
Sc0001635	1	484898	PG_10	51084338	51569235
Sc0001636	1	484774	PG_10	51569386	52054159
Sc0001637	1	484616	PG_10	52054310	52538925
Sc0001638	1	484602	PG_10	52539076	53023677
Sc0001639	1	484152	PG_10	53023828	53507979
xpSc0053256	1	484053	PG_10	53508130	53992182
Sc0001640	1	484010	PG_10	53992333	54476342
Sc0001641	1	483809	PG_10	54476493	54960301
Sc0001642	1	483643	PG_10	54960452	55444094
Sc0001643	1	483566	PG_10	55444245	55927810
Sc0001644	1	483454	PG_10	55927961	56411414
Sc0001645	1	483227	PG_10	56411565	56894791
Sc0001646	1	482916	PG_10	56894942	57377857
Sc0001647	1	482875	PG_10	57378008	57860882
Sc0001648	1	482848	PG_10	57861033	58343880
Sc0001649	1	482385	PG_10	58344031	58826415
Sc0001650	1	482269	PG_10	58826566	59308834
Sc0001651	1	481824	PG_10	59308985	59790808
Sc0001652	1	481605	PG_10	59790959	60272563
Sc0001653	1	481526	PG_10	60272714	60754239
Sc0001654	1	481507	PG_10	60754390	61235896
Sc0001655	1	481455	PG_10	61236047	61717501
Sc0001656	1	481078	PG_10	61717652	62198729
Sc0001657	1	481074	PG_10	62198880	62679953
Sc0001658	1	480873	PG_10	62680104	63160976
xfSc0000047	1	480871	PG_10	63161127	63641997
Sc0001659	1	480614	PG_10	63642148	64122761
xpSc0053257	1	480455	PG_10	64122912	64603366
xfSc0000048	1	480409	PG_10	64603517	65083925
Sc0001660	1	480134	PG_10	65084076	65564209
Sc0001661	1	479833	PG_10	65564360	66044192
Sc0001662	1	479606	PG_10	66044343	66523948
Sc0001663	1	479545	PG_10	66524099	67003643
Sc0001664	1	479518	PG_10	67003794	67483311
xfSc0000049	1	479454	PG_10	67483462	67962915
Sc0001665	1	479330	PG_10	67963066	68442395
Sc0001666	1	479209	PG_10	68442546	68921754
Sc0001667	1	478817	PG_10	68921905	69400721
Sc0001668	1	478772	PG_10	69400872	69879643
Sc0001669	1	478527	PG_10	69879794	70358320
Sc0001671	1	477947	PG_10	70358471	70836417
Sc0001672	1	477945	PG_10	70836568	71314512
Sc0001673	1	477875	PG_10	71314663	71792537
Sc0001674	1	477595	PG_10	71792688	72270282
Sc0001675	1	477440	PG_10	72270433	72747872
xfSc0000050	1	477268	PG_10	72748023	73225290
Sc0001676	1	477128	PG_10	73225441	73702568
xpSc0053258	1	477036	PG_10	73702719	74179754
Sc0001677	1	476696	PG_10	74179905	74656600
xfSc0000051	1	476554	PG_10	74656751	75133304
Sc0001678	1	476323	PG_10	75133455	75609777
Sc0001679	1	476055	PG_10	75609928	76085982
Sc0001680	1	476010	PG_10	76086133	76562142
Sc0001681	1	475942	PG_10	76562293	77038234
Sc0001682	1	475890	PG_10	77038385	77514274
Sc0001683	1	475856	PG_10	77514425	77990280
Sc0001684	1	475766	PG_10	77990431	78466196
Sc0001685	1	475504	PG_10	78466347	78941850
Sc0001686	1	475400	PG_10	78942001	79417400
Sc0001687	1	475265	PG_10	79417551	79892815
Sc0001688	1	475053	PG_10	79892966	80368018
Sc0001689	1	474822	PG_10	80368169	80842990
Sc0001690	1	474772	PG_10	80843141	81317912
Sc0001691	1	474423	PG_10	81318063	81792485
Sc0001692	1	474025	PG_10	81792636	82266660
Sc0001693	1	473568	PG_10	82266811	82740378
Sc0001694	1	473525	PG_10	82740529	83214053
Sc0001695	1	473512	PG_10	83214204	83687715
Sc0001696	1	473441	PG_10	83687866	84161306
Sc0001697	1	473215	PG_10	84161457	84634671
Sc0001698	1	473063	PG_10	84634822	85107884
Sc0001699	1	472941	PG_10	85108035	85580975
Sc0001700	1	472840	PG_10	85581126	86053965
Sc0001701	1	472548	PG_10	86054116	86526663
Sc0001702	1	472395	PG_10	86526814	86999208
Sc0001703	1	472387	PG_10	86999359	87471745
Sc0001670	1	472288	PG_10	87471896	87944183
xfSc0000052	1	472169	PG_10	87944334	88416502
Sc0001704	1	472027	PG_10	88416653	88888679
Sc0001705	1	471652	PG_10	88888830	89360481
xpSc0053259	1	471399	PG_10	89360632	89832030
Sc0001706	1	471309	PG_10	89832181	90303489
Sc0001707	1	471143	PG_10	90303640	90774782
Sc0001709	1	470678	PG_10	90774933	91245610
Sc0001710	1	470406	PG_10	91245761	91716166
Sc0001708	1	470352	PG_10	91716317	92186668
Sc0001711	1	469995	PG_10	92186819	92656813
Sc0001712	1	469636	PG_10	92656964	93126599
Sc0001713	1	469576	PG_10	93126750	93596325
Sc0001715	1	469378	PG_10	93596476	94065853
Sc0001716	1	469267	PG_10	94066004	94535270
Sc0001717	1	469041	PG_10	94535421	95004461
Sc0001718	1	468951	PG_10	95004612	95473562
Sc0001719	1	468842	PG_10	95473713	95942554
Sc0001720	1	468377	PG_10	95942705	96411081
Sc0001714	1	468217	PG_10	96411232	96879448
Sc0001721	1	468095	PG_10	96879599	97347693
Sc0001722	1	467949	PG_10	97347844	97815792
Sc0001723	1	467846	PG_10	97815943	98283788
Sc0001724	1	467456	PG_10	98283939	98751394
Sc0001725	1	467150	PG_10	98751545	99218694
Sc0001726	1	467108	PG_10	99218845	99685952
Sc0001727	1	466841	PG_10	99686103	100152943
Sc0001728	1	466829	PG_10	100153094	100619922
Sc0001729	1	466754	PG_10	100620073	101086826
Sc0001730	1	466102	PG_10	101086977	101553078
xpSc0053260	1	466031	PG_10	101553229	102019259
Sc0001731	1	465961	PG_10	102019410	102485370
Sc0001732	1	465342	PG_10	102485521	102950862
xpSc0053261	1	464751	PG_10	102951013	103415763
Sc0001733	1	464730	PG_10	103415914	103880643
Sc0001734	1	464560	PG_10	103880794	104345353
Sc0001735	1	464309	PG_10	104345504	104809812
Sc0001736	1	464267	PG_10	104809963	105274229
Sc0001737	1	464185	PG_10	105274380	105738564
Sc0001738	1	463768	PG_10	105738715	106202482
Sc0001739	1	463570	PG_10	106202633	106666202
xpSc0053262	1	462971	PG_10	106666353	107129323
Sc0001740	1	462961	PG_10	107129474	107592434
Sc0001741	1	462891	PG_10	107592585	108055475
Sc0001742	1	462887	PG_10	108055626	108518512
Sc0001743	1	462672	PG_10	108518663	108981334
Sc0001744	1	462110	PG_10	108981485	109443594
Sc0001745	1	462016	PG_10	109443745	109905760
Sc0001746	1	461699	PG_10	109905911	110367609
Sc0001747	1	461344	PG_10	110367760	110829103
Sc0001748	1	460982	PG_10	110829254	111290235
Sc0001749	1	460966	PG_10	111290386	111751351
Sc0001750	1	460778	PG_10	111751502	112212279
Sc0001751	1	460467	PG_10	112212430	112672896
Sc0001752	1	460407	PG_10	112673047	113133453
Sc0001753	1	460113	PG_10	113133604	113593716
Sc0001754	1	459827	PG_10	113593867	114053693
Sc0001755	1	459653	PG_10	114053844	114513496
Sc0001756	1	459584	PG_10	114513647	114973230
Sc0001757	1	459488	PG_10	114973381	115432868
Sc0001758	1	459457	PG_10	115433019	115892475
Sc0001759	1	458883	PG_10	115892626	116351508
Sc0001760	1	458744	PG_10	116351659	116810402
xpSc0053263	1	458734	PG_10	116810553	117269286
Sc0001761	1	458080	PG_10	117269437	117727516
Sc0001762	1	458032	PG_10	117727667	118185698
Sc0001763	1	457987	PG_10	118185849	118643835
Sc0001764	1	457888	PG_10	118643986	119101873
Sc0001765	1	457768	PG_10	119102024	119559791
Sc0001766	1	457693	PG_10	119559942	120017634
Sc0001767	1	457653	PG_10	120017785	120475437
Sc0001768	1	457622	PG_10	120475588	120933209
Sc0001769	1	457408	PG_10	120933360	121390767
Sc0001770	1	457220	PG_10	121390918	121848137
Sc0001771	1	456899	PG_10	121848288	122305186
Sc0001772	1	456850	PG_10	122305337	122762186
Sc0001773	1	456821	PG_10	122762337	123219157
Sc0001774	1	456680	PG_10	123219308	123675987
Sc0001775	1	456420	PG_10	123676138	124132557
Sc0001776	1	455671	PG_10	124132708	124588378
Sc0001777	1	455559	PG_10	124588529	125044087
Sc0001778	1	455484	PG_10	125044238	125499721
Sc0001779	1	455292	PG_10	125499872	125955163
xfSc0000053	1	455197	PG_10	125955314	126410510
Sc0001782	1	455172	PG_10	126410661	126865832
Sc0001781	1	455172	PG_10	126865983	127321154
Sc0001783	1	455169	PG_10	127321305	127776473
Sc0001784	1	455160	PG_10	127776624	128231783
Sc0001785	1	455096	PG_10	128231934	128687029
xfSc0000054	1	455043	PG_10	128687180	129142222
Sc0001786	1	454921	PG_10	129142373	129597293
Sc0001787	1	454911	PG_10	129597444	130052354
xpSc0053264	1	454821	PG_10	130052505	130507325
Sc0001788	1	454532	PG_10	130507476	130962007
Sc0001789	1	454317	PG_10	130962158	131416474
Sc0001790	1	453908	PG_10	131416625	131870532
Sc0001791	1	453346	PG_10	131870683	132324028
Sc0001792	1	453304	PG_10	132324179	132777482
Sc0001793	1	453184	PG_10	132777633	133230816
Sc0001794	1	452639	PG_10	133230967	133683605
Sc0001795	1	452563	PG_10	133683756	134136318
Sc0001796	1	452418	PG_10	134136469	134588886
Sc0001797	1	452314	PG_10	134589037	135041350
Sc0001798	1	452129	PG_10	135041501	135493629
Sc0001799	1	452098	PG_10	135493780	135945877
Sc0001800	1	451736	PG_10	135946028	136397763
Sc0001801	1	451733	PG_10	136397914	136849646
Sc0001803	1	451405	PG_10	136849797	137301201
Sc0001804	1	451387	PG_10	137301352	137752738
Sc0001805	1	451327	PG_10	137752889	138204215
Sc0001806	1	451254	PG_10	138204366	138655619
Sc0001807	1	451085	PG_10	138655770	139106854
Sc0001808	1	450841	PG_10	139107005	139557845
Sc0001809	1	450378	PG_10	139557996	140008373
Sc0001780	1	450280	PG_10	140008524	140458803
Sc0001810	1	450233	PG_10	140458954	140909186
Sc0001811	1	450221	PG_10	140909337	141359557
Sc0001812	1	449976	PG_10	141359708	141809683
Sc0001813	1	449851	PG_10	141809834	142259684
xpSc0053265	1	449829	PG_10	142259835	142709663
Sc0001814	1	449824	PG_10	142709814	143159637
Sc0001815	1	449754	PG_10	143159788	143609541
Sc0001816	1	449457	PG_10	143609692	144059148
Sc0001817	1	449363	PG_10	144059299	144508661
Sc0001818	1	449341	PG_10	144508812	144958152
Sc0001819	1	449248	PG_10	144958303	145407550
Sc0001820	1	448963	PG_10	145407701	145856663
Sc0001821	1	448869	PG_10	145856814	146305682
Sc0001822	1	448811	PG_10	146305833	146754643
Sc0001823	1	448776	PG_10	146754794	147203569
Sc0001824	1	448554	PG_10	147203720	147652273
Sc0001825	1	448433	PG_10	147652424	148100856
Sc0001826	1	448274	PG_10	148101007	148549280
Sc0001827	1	448252	PG_10	148549431	148997682
Sc0001828	1	448174	PG_10	148997833	149446006
Sc0001829	1	447903	PG_10	149446157	149894059
Sc0001830	1	447426	PG_10	149894210	150341635
Sc0001831	1	447277	PG_10	150341786	150789062
Sc0001832	1	447068	PG_10	150789213	151236280
Sc0001833	1	446803	PG_10	151236431	151683233
Sc0001834	1	446760	PG_11	1	446760
Sc0001835	1	446659	PG_11	446911	893569
Sc0001836	1	446618	PG_11	893720	1340337
xpSc0053266	1	446603	PG_11	1340488	1787090
Sc0001837	1	446489	PG_11	1787241	2233729
Sc0001838	1	446486	PG_11	2233880	2680365
Sc0001802	1	446332	PG_11	2680516	3126847
Sc0001839	1	446232	PG_11	3126998	3573229
Sc0001840	1	446068	PG_11	3573380	4019447
Sc0001841	1	445799	PG_11	4019598	4465396
Sc0001842	1	445557	PG_11	4465547	4911103
Sc0001843	1	445373	PG_11	4911254	5356626
Sc0001844	1	445220	PG_11	5356777	5801996
Sc0001845	1	444968	PG_11	5802147	6247114
xfSc0000055	1	444698	PG_11	6247265	6691962
Sc0001846	1	444654	PG_11	6692113	7136766
Sc0001847	1	444490	PG_11	7136917	7581406
Sc0001848	1	444271	PG_11	7581557	8025827
Sc0001849	1	444267	PG_11	8025978	8470244
Sc0001850	1	444213	PG_11	8470395	8914607
Sc0001851	1	443736	PG_11	8914758	9358493
Sc0001852	1	443007	PG_11	9358644	9801650
Sc0001853	1	442828	PG_11	9801801	10244628
Sc0001854	1	442499	PG_11	10244779	10687277
Sc0001855	1	442450	PG_11	10687428	11129877
Sc0001856	1	442412	PG_11	11130028	11572439
xpSc0053267	1	442063	PG_11	11572590	12014652
Sc0001857	1	442013	PG_11	12014803	12456815
Sc0001858	1	441657	PG_11	12456966	12898622
Sc0001859	1	441391	PG_11	12898773	13340163
Sc0001860	1	441324	PG_11	13340314	13781637
Sc0001861	1	441056	PG_11	13781788	14222843
Sc0001862	1	440953	PG_11	14222994	14663946
Sc0001863	1	440947	PG_11	14664097	15105043
Sc0001864	1	440679	PG_11	15105194	15545872
Sc0001865	1	440501	PG_11	15546023	15986523
Sc0001866	1	440056	PG_11	15986674	16426729
Sc0001867	1	439993	PG_11	16426880	16866872
Sc0001868	1	439828	PG_11	16867023	17306850
Sc0001869	1	439753	PG_11	17307001	17746753
Sc0001870	1	439608	PG_11	17746904	18186511
Sc0001871	1	439530	PG_11	18186662	18626191
Sc0001872	1	438939	PG_11	18626342	19065280
Sc0001873	1	438852	PG_11	19065431	19504282
Sc0001874	1	438777	PG_11	19504433	19943209
Sc0001875	1	438697	PG_11	19943360	20382056
Sc0001876	1	438521	PG_11	20382207	20820727
Sc0001877	1	438512	PG_11	20820878	21259389
Sc0001878	1	438474	PG_11	21259540	21698013
Sc0001879	1	438331	PG_11	21698164	22136494
[truncated: 35,621 more rows]
